# Supplementary material for: PWD/Ph-Encoded Genetic Variants Modulate the Cellular Wnt/β-Catenin Response to Suppress Apc Min-Triggered Intestinal Tumor Formation
Source: Oxford University Press journal article supplement (doi:10.1158/0008-5472.can-20-1480), 2020-11-05
Supplement: 00085472can201480-sup-242572_2_supp_6643676_qg4vgj.xlsx [file 00085472can201480-sup-242572_2_supp_6643676_qg4vgj.xlsx]

## Sheet: Supplementary Table 1
Supplementary Table 1: GSEA signatures and references (Wnt target genes are taken from the HALLMARK Signature)
Erk targets	Wnt targets	Lgr5-Intestinal Stem Cells (ISC2)	TA (Proliferation)	Enterocytes	Lgr5_Intestinal Stem Cells (ISC1)	Paneth Cells
Uhlitz et al. Mol. Syst. Biol. 13, 928 (2017)	MSIGDB Hallmarks signature	Merlos-Suarez et al. Cell Stem Cell 2011	Merlos-Suarez et al. Cell Stem Cell 2011	Merlos-Suarez et al., Cell Stem Cell 2011	Munoz et al. 2012 EMBO (PMID: 22692129) Table S3	Sato et al., Nature 2011
Gbe1	ADAM17	ABTB2	4933406C10RIK	ABTB2	1300002K09Rik	Mptx1
Gch1	AXIN1	AFAP1L1	5730471H19RIK	AFAP1L1	6230424C14Rik	Ang4
Pnp	AXIN2	APCDD1	ARL4C	APCDD1	Adra2A	Bhlhb8
Pnp2	CCND2	ARHGEF4	ASCL2*	ARHGEF4	Afap1	C4bp
Pmm2	CSNK1E	ARNT2	ASRGL1*	ARNT2	Angpt2	Ccl6
Cdkn1a	CTNNB1	AXIN2	BCL2*	AXIN2	Apcdd1	Ccl9
Cd55	CUL1	BCL2	BEX1	BCL2	Arhgef4	Chac1
Cd55b	DKK1	BEX1	BEX4	BEX1	Arl4C	Chgb
Cd44	DKK4	BEX2	C13ORF15*	BEX2	Ascl2	Clps
Tgfb1	DLL1	CAP2	CBS	CAP2	Atg16L2	Copz2
Cacna2d1	DVL2	CCDC46	CD44	CCDC46	Atm	Defa1
Plat	FRAT1	CYP2E1	CENPF	CYP2E1	Axin2	Defcr20
Emp1	FZD1	DGKG	CHST11	DGKG	B930095G15Rik	Defcr6
Gtf2b	FZD8	DLGAP1	CYP11A1	DLGAP1	Cachd1	Guca2a
Id4	GNAI1	DTL	CYP2E1	DTL	Car12	Habp2
Cyr61	HDAC11	DYNC2H1	DCLK1	DYNC2H1	Casp12	Mmp7
Cdk7	HDAC2	EPHA4	E330027M22RIK	EPHA4	Cbx6	Nupr1
Clu	HDAC5	FAM64A	EPHB3	FAM64A	Cc2D2A	Pnliprp2
Crabp2	HEY1	FGFR4	ESAM	FGFR4	Cd320	Reg4
Ctgf	HEY2	FMNL2	FAM49A	FMNL2	Cdc42Ep1	Rnase1
Gadd45a	JAG1	FSTL1	FSTL1*	FSTL1	Cdo1	Sct
Hbegf	JAG2	GRAMD1A	FZD2	GRAMD1A	Ces1D	Spink4
Egr4	KAT2A	GRK4	HEBP2	GRK4	Cgnl1	Lyz
Ercc1	LEF1	IGF1R	IGFBP4*	IGF1R	Cited4
Hmgcs1	MAML1	IGFBP4	KIF26B	IGFBP4	Clca1
Nr4a1	MYC	IL17RD	KLHL8*	IL17RD	Clca2
Inpp1	NCOR2	KIF12	LFNG	KIF12	Clic6
Mxd1	NCSTN	KIF26B	LGR5	KIF26B	Cpn1
Npas2	NKD1	KLHL13	LIMCH1	KLHL13	Cttnbp2
Nptx1	NOTCH1	LDHB	MARVELD1	LDHB	Cyp2E1
Nptx2	NOTCH4	LGR5	MEX3A	LGR5	D930015E06Rik
Psmd12	NUMB	LIFR	MPP3	LIFR	Dct
Uap1	PPARD	LOC285141	NAV1*	LOC285141	Ddb2
Gpr137b	PSEN2	MDFIC	NAV1*	MDFIC	Ddo
Phlda2	PTCH1	MPP3	PCDH8*	MPP3	Dync2H1
Upp1	RBPJ	NPNT	PHGDH	NPNT	E230029C05Rik
Vgf	SKP2	PITPNC1	PRICKLE1	PITPNC1	Ell3
Zfp36	TCF7	PLP1	PSRC1*	PLP1	Emp2
Enc1	TP53	RASSF4	PTHLH	RASSF4	Epha4
Bhlhe40	WNT1	RNF157	PTPRO	RNF157	Ephb3
Stx11	WNT5B	SCN2B	PVT1	SCN2B	Esam
Ier3	WNT6	SEPT6	PXDN	SEPT6	Esrrg
Bcl10		SERTAD4	RASSF5	SERTAD4	Evl
Efnb2		SLC1A2	SCN2B*	SLC1A2	Farp1
Gpr50		SLC38A4	SLC14A1	SLC38A4	Fbxo21
Homer1		SLCO3A1	SLC1A2	SLCO3A1	Fgfr4
Dusp1		SLIT2	SLCO3A1*	SLIT2	Fmnl2
Etv5		SOAT1	SOAT1	SOAT1	Fstl1
Ddx21		SORBS2	SORCS2	SORBS2	Fzd2
Ier2		SOX4	ST3GAL3	SOX4	Gas6
Fos		TACC1	TACC1	TACC1	Gkap1
Fosl2		TMEM182	TEAD2	TMEM182	Gkn3
Fosl1		TNFRSF19	TGIF2	TNFRSF19	Gpld1
Insig1		UTRN	TUBB2B	UTRN	Gpr30
Taf13		ZNF141	VAV3	ZNF141	Gramd1A
Klf10		ZNF273		ZNF273	Hunk
Ubxn8		ZNF493		ZNF493	Igfbp4
Spry2		ZNF626		ZNF626	Il17Rd
Nab2		ZNF678		ZNF678	Immp2L
Tnfaip3		ZNF680		ZNF680	Irs1
Rbm14		ZNF714		ZNF714	Kcne3
Drap1		ZNF85		ZNF85	Klhl8
Arid3b		ZNF92		ZNF92	Large
Gpr75		ZNF93		ZNF93	Lgr5
Rnf24					Lipt2
Mak16					Man2A2
Cyb5r2					Mex3A
Sbds					Mia1
Gnl2					Mpp3
Coq10b					Msi1
Riok1					Myc
Romo1					Mycl1
Tfb2m					Nap1L1
Junb					Napepld
Mcl1					Notch1
Gadd45b					Notch2
Ccne2					Phldb2
Nppc					Pla2G4A
Pea15a					Plekhb1
Prnp					Plxnb1
Spry4					Pogk
Sertad1					Ppap2B
Tnfrsf12a					Prelp
Rnf19a					Prkd3
Ppp1r15a					Psd3
Chst15					Psrc1
Fam3c					Ptpro
Trim9					Ptprs
Arc					Rad51L1
Lrrc8b					Rasa3
Pbdc1					Rgmb
Baiap2					Rgs12
Nagk					Rnf32
Txnl4b					Rnf43
C87436					Scn2B
Akirin2					Sectm1B
Agpat5					Sema7A
Errfi1					Sestd1
Cldnd1					Sfrp5
Utp3					Shisa2
Trib3					Slc19A2
Rai2					Slc23A3
Slc30a7					Slc27A2
Chac1					Slco3A1
Pgbd5					Smo
Yrdc					Snx10
Lonrf3					Sorcs2
Rnf122					Sox4
Fam57a					Sox9
Spsb1					Sp5
Slc35g2					Srl
Pxdc1					Sycn
Tmem88					Tead2
Syap1					Tex9
Pnpla8					Tfpi
Fbxo32					Tgif2
Csrnp1					Tmem209
Cpeb2					Tnfrsf19
Kdm6b					Trim44
Mfsd2a					Ttc21B
Egr2					Ttpa
Chrm4					Txndc16
Slc7a1					Utrn
Car8					Vav3
Epha2					Wdr35
Rnd3					Wdr90
F2rl1					Wwp1
Serpine2					Wwtr1
Kctd13					Zfp12
Nipal1					Zkscan17
Ptgs2					Znrf3
Elf4					Zranb3
Ifrd1					Acsm3
Sdc4					Afap1L1
Thbs1					Agr3
Zyx					Aqp4
Gpr3					Cd44
Fosb					Cdca7
Btg2					Cdk6
Midn					Clca4
Nrarp					Cnn3
Sgms2					Dach1
Srxn1					Dmpk
Otud4					Fam115C
Timp3					Fzd7
Car2					Glrx
Hk2					Grb7
Qsox1					Kcnq1
Serpinb9					Lcp1
Egr3					Mecom
Gem					Nav1
Nxf1					Olfm4
Tfpi2					Paics
Pygo1					Picalm
Abhd5					Sept6
Cmc2					Slc12A2
Arrdc4					Smoc2
Bzw1					Soat1
Ly6g5b					Sorbs2
9130008F23Rik					Tns3
Abcb1a					Vdr
En2					1500011H22Rik
Dnaja1					2310008H04Rik
Dusp6					4933439C10Rik
Tnc					Acpl2
Krt8					Acvr2B
Slc7a5					Adrbk2
Ndrg1					Ai480653
Dnajb1					Aldh7A1
Prkcd					Alms1
Egr1					Als2Cr4
Tor1b					App
Rps24					Aqp1
Slc2a1					Arhgap39
Hipk2					Aspm
Serpinb8					Atp11A
Tmem2					Atr
Trib1					Au020206
Spopl					Bckdhb
Zswim6					Bcl2
Fam83g					Bcl7A
Ubald2					Blnk
Arl5b					Brca2
Zcchc12					C79407
Pdk4					Ccbl2
					Ccdc18
					Cdca7L
					Cenpf
					Cep192
					Cit
					Ckap2
					Csad
					Csnk1E
					Dapk2
					Dctd
					Dtl
					Efna4
					Ehf
					Elmo1
					Engase
					Eri2
					Espl1
					Etv6
					Fads1
					Fam115A
					Fam189B
					Fam92A
					Fhdc1
					Fras1
					Gabbr1
					Gemin8
					Gins1
					Gm3626
					Gm5918
					Haus4
					Hdac11
					Hemgn
					Hirip3
					Ifitm2
					Ift122
					Ilf3
					Isyna1
					Kif12
					Kif20A
					Klhl23
					Krt23
					Lancl1
					Lass6
					Limk2
					Lpar6
					Lrig1
					Lysmd2
					Maged1
					Marveld1
					Mcc
					Mcm8
					Mdn1
					Mfge8
					Mif
					Mlh3
					Mlxip
					Mpzl1
					Mpzl3
					Myo1B
					Nedd4
					Nelf
					Nfia
					Nfic
					Nin
					Nod1
					Nt5C3L
					Orc1
					Palb2
					Pbx1
					Pck2
					Pde3B
					Pds5B
					Peli2
					Phc1
					Phlpp1
					Plce1
					Pls3
					Pnpla7
					Poglut1
					Pold1
					Pole
					Poli
					Ppat
					Ppm1F
					Ppp1R9A
					Prkacb
					Prpf40B
					Prps2
					Prrc2B
					Ptprm
					Qsox2
					Rassf4
					Rgnef
					Rhbdf1
					Rnf219
					Rprd1A
					Sema3B
					Sesn3
					Slc39A10
					Slc44A2
					Smpx
					Sord
					Spag5
					Spata24
					Spice1
					Stk39
					Tbc1D19
					Tbc1D4
					Tgif1
					Tiam1
					Timeless
					Tmem132A
					Tmem194
					Tmem9
					Tnfaip8L1
					Tnfsf10
					Tns4
					Trim37
					Tspan5
					Ttc23
					Tubb2B
					Ung
					Vnn1
					Xrcc5
					Yap1
					Zbtb12
					Zbtb25
					Zbtb38
					Zfhx3
					Zfp275
					Zfp292
					Zfp318
					Zfp397
					Zfp462
					Zfp553
					Zfp566
					Zfp704
					Zfp783
					Zfp90
					Zmym1
					1110051M20Rik
					1190002H23Rik
					1700040L02Rik
					4933431E20Rik
					Acot1
					Ai747448
					Ak7
					Bc021891
					Bhlhb9
					Ccdc111
					Ciita
					Clu
					Dtx4
					Fam171A1
					Fgd1
					Greb1
					H2-Aa
					H2-Eb1
					Hmbox1
					Hmga2
					Iffo2
					Ifitm3
					Impdh2
					Irf2Bp2
					Kank1
					Klhl24
					Lamb3
					Lect2
					Nr2E3
					Nrg4
					Nrn1
					Nrtn
					Pcdh8
					Pde8B
					Pdgfa
					Phf20
					Prss23
					Rasl11B
					Rassf5
					Rccd1
					Rdh16
					Rhobtb3
					S100Pbp
					Sdc4
					Sgk1
					Slc14A1
					Slc16A13
					Smarcd3
					Tbc1D9
					Tcf7
					Tifa
					Tlr2
					Trim24
					Trim32
					Wfdc15B
					Zc3Hav1L
					Zfp503
					Zfp618
					Zfp956

## Sheet: Supplementary Table 2
Supplementary Table 2: 58 differentially expressed genes on chromosome 5, B6 vs C5 APC min normal intestine
chr	start	end	strand	Gene name	baseMean	log2FoldChange	lfcSE	stat	pvalue	padj
chr5	5664828	5694568	-	Steap2	44.0897	-2.03567	0.32384	-6.28603	3.25678e-10	2.3945e-07
chr5	8490335	8622952	-	Rundc3b	118.484	-2.52354	0.266927	-9.45402	3.26048e-21	2.03764e-17
chr5	8966047	8997146	-	Crot	404.821	1.082	0.271376	3.98707	6.68938e-05	0.00610296
chr5	21884453	22344705	-	Reln	203.904	-0.940543	0.229017	-4.10687	4.01062e-05	0.00413385
chr5	23787743	23820369	+	Rint1	131.598	0.895227	0.189634	4.72082	2.34901e-06	0.000504142
chr5	24586749	24592486	+	Chpf2	99.9585	-0.952198	0.228945	-4.15907	3.19553e-05	0.00347312
chr5	29229801	29378390	-	Lmbr1	41.6218	-1.36988	0.309769	-4.42225	9.7677e-06	0.00137176
chr5	30950065	30955095	+	Abhd1	17.9653	3.40312	0.67836	5.01668	5.25714e-07	0.000160266
chr5	30951666	30960361	-	Preb	99.5963	-0.938216	0.225798	-4.15511	3.25135e-05	0.00350333
chr5	31048639	31054633	+	Atraid	138.441	-0.97435	0.238901	-4.07846	4.53342e-05	0.00446167
chr5	31494760	31511627	+	Gpn1	43.2771	1.27576	0.306425	4.16337	3.13583e-05	0.00343813
chr5	32232707	32364356	+	Plb1	3244.27	8.60779	1.19866	7.1812	6.91003e-13	1.07961e-09
chr5	35041552	35048436	+	Hgfac	222.731	1.52102	0.2706	5.62091	1.8995e-08	9.89242e-06
chr5	36794866	36796754	-	Mrfap1	268.719	-1.2153	0.23815	-5.1031	3.34129e-07	0.000112872
chr5	47983154	48306282	+	Slit2	47.99	-1.30649	0.334381	-3.90717	9.33816e-05	0.00772965
chr5	64953094	64960034	-	Tlr6	20.0512	4.06505	0.63484	6.40326	1.52091e-10	1.26733e-07
chr5	65391496	65409207	+	Lias	87.7886	-1.19596	0.278595	-4.29281	1.76423e-05	0.00217898
chr5	72203328	72298771	+	Atp10d	28.3215	2.09853	0.39519	5.31017	1.09521e-07	4.72035e-05
chr5	77016022	77061522	+	1700023E05Rik	34.3907	6.68543	1.05055	6.36377	1.96866e-10	1.53789e-07
chr5	87000859	87013274	+	Ugt2b35	125.907	1.18598	0.239666	4.94847	7.47979e-07	0.000217418
chr5	87065926	87092555	-	Ugt2b36	57.4091	3.02688	0.369727	8.1868	2.68271e-16	8.38278e-13
chr5	87324971	87337195	-	Ugt2a3	209.267	6.7187	1.28461	5.23015	1.69372e-07	6.61555e-05
chr5	87513338	87538195	-	Sult1b1	929.182	1.5989	0.21961	7.28063	3.32263e-13	5.9328e-10
chr5	88565039	88651417	+	Rufy3	79.9338	0.87034	0.213272	4.0809	4.48614e-05	0.00445503
chr5	92359544	92363296	-	Cxcl11	16.3952	3.69805	0.762497	4.84993	1.23508e-06	0.000315045
chr5	96373954	96784728	+	Fras1	87.6121	2.31085	0.474409	4.871	1.11032e-06	0.000297648
chr5	100846228	100899102	+	Agpat9	478.252	0.901982	0.191172	4.71817	2.37974e-06	0.000504142
chr5	103989764	104021796	-	Hsd17b11	1339.04	0.912006	0.21439	4.25397	2.10016e-05	0.00249999
chr5	113793728	113800352	-	Tmem119	104.207	-1.60835	0.292418	-5.50019	3.79378e-08	1.89674e-05
chr5	114165517	114250758	+	Acacb	38.8949	-1.52273	0.390377	-3.90067	9.59274e-05	0.00783658
chr5	114444305	114460590	+	Mvk	133.479	-1.15305	0.292858	-3.93721	8.24328e-05	0.00722716
chr5	114775139	114805820	+	Ankrd13a	982.647	-0.744233	0.153423	-4.85084	1.22939e-06	0.000315045
chr5	115279701	115296972	+	Coq5	104.579	1.41368	0.233344	6.05837	1.37505e-09	9.04564e-07
chr5	115559466	115563729	+	Rplp0	1002.98	-1.97622	0.215364	-9.17619	4.46625e-20	1.86079e-16
chr5	117319265	117355006	+	Vsig10	401.928	0.743604	0.162664	4.57142	4.84435e-06	0.000854056
chr5	120458201	120472763	-	Sdsl	46.0751	-1.60636	0.38182	-4.20712	2.5865e-05	0.00298745
chr5	120753097	120777659	-	Oas3	95.3477	1.41078	0.330244	4.27192	1.93795e-05	0.00232908
chr5	123015073	123030452	+	Orai1	149.127	-1.04319	0.248989	-4.1897	2.79327e-05	0.00308966
chr5	123171806	123182686	-	Hpd	42.0438	-7.87328	1.21021	-6.50572	7.73235e-11	6.90334e-08
chr5	124004640	124032260	-	Vps37b	166.338	-0.900073	0.229973	-3.91382	9.08474e-05	0.00757001
chr5	124345438	124354628	-	Cdk2ap1	13.2823	2.30299	0.556802	4.1361	3.53259e-05	0.00367949
chr5	124540790	124550503	+	Tmed2	187.403	1.23415	0.187802	6.57155	4.97936e-11	4.78746e-08
chr5	124570213	124579057	-	Eif2b1	131.841	-0.810857	0.177979	-4.5559	5.21607e-06	0.000893091
chr5	125385964	125390017	-	Ubc	218.551	-1.76957	0.370466	-4.77661	1.78273e-06	0.000412636
chr5	125441567	125460885	+	Bri3bp	200.941	1.70103	0.246903	6.88949	5.59938e-12	6.99867e-09
chr5	125475872	125517403	+	Aacs	485.31	-1.43759	0.295228	-4.86942	1.11925e-06	0.000297648
chr5	129725074	129758325	+	Gbas	178.509	-0.717759	0.159307	-4.50552	6.62101e-06	0.00104754
chr5	129881160	129887470	-	Chchd2	211.835	-1.6218	0.403722	-4.01712	5.89146e-05	0.00549533
chr5	137378636	137477064	-	Zan	29.6393	-4.26497	0.624116	-6.83361	8.28012e-12	9.40848e-09
chr5	137650853	137684693	-	Agfg2	105.607	-1.01448	0.227987	-4.44971	8.59853e-06	0.00124471
chr5	137745968	137768453	+	Tsc22d4	430.758	-0.860305	0.181961	-4.72798	2.26767e-06	0.000497255
chr5	139471215	139484491	-	Zfand2a	132.946	1.29499	0.268561	4.82195	1.42164e-06	0.000341714
chr5	140340302	140389247	-	Snx8	33.3242	1.79984	0.44649	4.03109	5.55198e-05	0.00529727
chr5	144019806	144050609	-	Ocm	43.1725	-6.06606	0.849424	-7.14138	9.24005e-13	1.28324e-09
chr5	144545886	144557478	+	Nptx2	25.1882	-2.45127	0.458717	-5.34376	9.10383e-08	4.2144e-05
chr5	146832889	146837032	+	Rpl21	29.2958	1.98304	0.460919	4.30236	1.68989e-05	0.00215388
chr5	149616844	149636315	-	Hsph1	318.637	2.23788	0.336672	6.64707	2.98994e-11	3.11427e-08
chr5	149678256	149762599	+	B3glct	85.4378	-0.802138	0.203857	-3.93481	8.32635e-05	0.00722716

## Sheet: Supplementary Table 3
Supplementary Table 3: 116 differentially expressed genes not located on chromosome 5, B6 vs C5 APC min normal intestine
chr	start	end	strand	name	baseMean	log2FoldChange	lfcSE	stat	pvalue	padj
chr1	67123026	67231267	+	Cps1	3456.92	0.859074	0.17743	4.84176	1.28697e-06	0.000321718
chr1	128284763	128328318	-	Lct	1024.12	8.31912	1.76682	4.70852	2.49525e-06	0.000519801
chr1	161040612	161070632	-	Dars2	111.878	0.903883	0.203519	4.44126	8.94336e-06	0.00127026
chr1	169949536	169969205	-	Hsd17b7	458.974	-1.18387	0.28161	-4.20395	2.62296e-05	0.00298745
chr2	26910806	26913311	+	Rpl7a	97.8557	-0.851121	0.22244	-3.82629	0.00013009	0.00927685
chr2	71873223	71903858	+	Pdk1	296.746	-0.845048	0.216969	-3.89479	9.82847e-05	0.00793527
chr2	85136359	85139923	+	Aplnr	18.837	2.3935	0.481857	4.96724	6.79117e-07	0.000202102
chr2	110597298	110649345	+	Slc5a12	217.794	3.50721	0.757517	4.62988	3.65873e-06	0.000721938
chr2	119174508	119177575	+	Gm14137	29.1142	-1.70852	0.438701	-3.89449	9.84052e-05	0.00793527
chr2	180725338	180742278	+	Slc17a9	32.1618	-1.59241	0.376659	-4.22773	2.36056e-05	0.00278346
chr3	40745612	40790365	+	Hspa4l	148.012	0.883141	0.224738	3.92965	8.50696e-05	0.00728278
chr3	40894276	40936307	+	3110057O12Rik	31.3979	1.70914	0.416499	4.10358	4.06804e-05	0.00413385
chr3	60031787	60040157	+	Aadac	53.2705	5.79695	1.32343	4.38023	1.18552e-05	0.00161063
chr3	88368616	88369720	-	Bglap3	363.225	5.74647	0.343117	16.7478	5.87393e-63	7.34182e-59
chr3	89271729	89280951	-	Efna1	240.068	-1.28711	0.225298	-5.71295	1.11033e-08	6.03391e-06
chr3	90541222	90543151	+	S100a16	254.564	-1.25523	0.311158	-4.03408	5.48174e-05	0.00527048
chr3	108554341	108554402	-	Scarna2	225.265	-1.91907	0.456551	-4.20342	2.62917e-05	0.00298745
chr3	122729157	122859374	+	Pde5a	985.68	0.743153	0.129843	5.72349	1.04361e-08	5.92911e-06
chr4	32982997	33022180	+	Rragd	200.831	2.55085	0.563936	4.5233	6.08826e-06	0.000988274
chr4	40203776	40239825	-	Ddx58	154.549	0.853629	0.223048	3.8271	0.000129662	0.00927685
chr4	44981410	44990696	+	Grhpr	40.1986	-1.75888	0.389938	-4.51065	6.46279e-06	0.00103562
chr4	49443531	49451109	-	Acnat1	216.249	0.987716	0.224736	4.395	1.10772e-05	0.00152147
chr4	53261355	53270232	-	AI427809	79.5363	1.47367	0.369924	3.98371	6.78468e-05	0.00614505
chr4	99929450	99987294	+	Pgm2	345.183	-0.980055	0.225027	-4.35527	1.32904e-05	0.0017862
chr4	106442333	106464325	-	Pcsk9	236.681	-1.58	0.367761	-4.29626	1.73703e-05	0.00217112
chr4	106661807	106678944	-	Ttc4	172.978	0.738618	0.193299	3.82113	0.000132844	0.00938086
chr4	106733914	106748292	+	Fam151a	157.225	7.99755	1.79484	4.45585	8.35616e-06	0.00122875
chr4	107291464	107307143	-	Dio1	150.123	2.46962	0.427958	5.77072	7.8934e-09	4.69807e-06
chr4	119108744	119137329	+	Slc2a1	144.126	-1.31786	0.222151	-5.93228	2.98751e-09	1.86704e-06
chr4	137277634	137299501	+	Wnt4	20.3539	2.04552	0.447776	4.56818	4.91975e-06	0.000854056
chr4	150855090	150868880	+	Errfi1	269.031	-1.05563	0.275639	-3.82976	0.00012827	0.00927685
chr4	155400968	155421704	-	5830444B04Rik	9.97046	2.34612	0.613322	3.82527	0.000130629	0.00927685
chr6	60944316	60989378	+	Mmrn1	63.3396	9.44969	1.2345	7.65468	1.9379e-14	4.20405e-11
chr6	72957346	72958748	-	Tmsb10	29.3173	-2.12564	0.447689	-4.74803	2.05411e-06	0.00045969
chr6	136803992	136804431	-	Hist4h4	426.719	-1.05938	0.270278	-3.9196	8.86966e-05	0.00749067
chr6	148047415	148182760	+	Far2	198.813	0.939297	0.24236	3.87563	0.00010635	0.0083602
chr7	19696243	19699166	-	Apoe	1409.13	-1.29086	0.305898	-4.21991	2.44395e-05	0.00285485
chr7	30945247	30956803	-	Usf2	94.566	-0.919834	0.225651	-4.07636	4.57466e-05	0.00446708
chr7	45522916	45526268	-	Ppp1r15a	36.3821	-1.29688	0.324005	-4.00266	6.2635e-05	0.00579907
chr7	81114798	81170416	+	Slc28a1	71.3489	5.12934	1.33346	3.84664	0.00011975	0.00885657
chr7	104470013	104507849	-	Trim30d	174.893	1.13707	0.218568	5.20238	1.96748e-07	7.23282e-05
chr7	126795233	126800447	-	Aldoa	2244.12	-1.29567	0.245971	-5.26757	1.38242e-07	5.57384e-05
chr7	138890835	138909506	-	Bnip3	36.5859	-1.80376	0.447812	-4.02795	5.62646e-05	0.00532766
chr7	140967428	140969827	+	Ifitm1	56.8214	-1.44084	0.333974	-4.31422	1.60166e-05	0.00208532
chr7	141278328	141279133	-	Sct	162.514	-1.57123	0.406031	-3.86973	0.000108954	0.00845849
chr7	141493135	141539857	-	Chid1	117.231	1.18978	0.277269	4.29106	1.77819e-05	0.00217898
chr8	18986232	18991055	-	Defb37	19.9542	-4.14769	0.969479	-4.27826	1.88356e-05	0.00228569
chr8	21249761	21250461	+	Gm15292	87.4115	1.08094	0.263376	4.10416	4.05795e-05	0.00413385
chr8	93256235	93279736	-	Ces1f	240.851	1.20369	0.307272	3.91733	8.95364e-05	0.00751085
chr8	94172617	94173567	+	Mt2	56.246	-2.76998	0.622734	-4.44809	8.66385e-06	0.00124471
chr8	122433595	122443422	-	Mvd	214.785	-1.12124	0.284843	-3.93633	8.27371e-05	0.00722716
chr8	124635755	124663369	-	2310022B05Rik	148.381	-0.98851	0.235536	-4.19685	2.70649e-05	0.00302926
chr9	5298516	5307281	+	Casp1	399.319	0.697232	0.17541	3.97488	7.04151e-05	0.00633179
chr9	21229729	21239332	-	Keap1	352.774	-0.744137	0.179645	-4.14226	3.43904e-05	0.00361215
chr9	59656367	59679375	+	Pkm	1376.66	-0.987551	0.221199	-4.46454	8.0241e-06	0.00122309
chr9	104063702	104127646	+	Acad11	378.781	1.01695	0.223856	4.5429	5.54862e-06	0.000924697
chr9	108854042	108862143	+	Slc26a6	844.655	0.835908	0.219592	3.80664	0.000140866	0.00989147
chr9	124423250	124424856	+	4930526I15Rik	51.5117	-1.81361	0.437009	-4.15006	3.32387e-05	0.00355086
chr10	3973074	4167081	+	Mthfd1l	80.2482	-1.21532	0.238638	-5.09272	3.5297e-07	0.000116099
chr10	59949674	59951770	-	Ddit4	305.514	-1.38454	0.266959	-5.18634	2.14464e-07	7.65883e-05
chr10	77032738	77050432	+	Slc19a1	114.235	-1.20709	0.313182	-3.85427	0.000116077	0.00879302
chr10	77986948	78009796	-	Pfkl	445.638	-2.06122	0.269459	-7.64947	2.0181e-14	4.20405e-11
chr10	80583648	80590341	-	Abhd17a	429.109	-1.33279	0.272516	-4.89068	1.00487e-06	0.000279108
chr10	80622779	80640771	+	Csnk1g2	657.783	-0.841246	0.194721	-4.32027	1.55839e-05	0.00205035
chr11	11814100	11898144	-	Ddc	264.273	1.73122	0.358008	4.83571	1.3267e-06	0.000325145
chr11	21556691	21571934	-	Mdh1	2198.53	1.06441	0.230902	4.60978	4.03104e-06	0.00074094
chr11	50293956	50325673	-	Canx	2917.77	0.641233	0.162407	3.94831	7.87045e-05	0.00702662
chr11	67052669	67067440	+	Sco1	132.72	0.744986	0.193593	3.84821	0.000118983	0.00885657
chr11	78324197	78326760	+	Aldoc	72.5582	-1.49843	0.323981	-4.62504	3.74527e-06	0.000721938
chr11	102106675	102107776	-	Pyy	230.09	-1.88861	0.42216	-4.47368	7.68845e-06	0.00118639
chr11	102348819	102365281	-	Slc4a1	17.3409	-4.54914	1.05788	-4.30026	1.70601e-05	0.00215388
chr11	116336344	116413032	-	Rnf157	26.1114	-1.50071	0.388103	-3.86679	0.000110277	0.00850832
chr11	116676704	116694660	-	St6galnac2	119.361	1.23571	0.258624	4.77801	1.77039e-06	0.000412636
chr11	120948483	120959000	+	Slc16a3	467.61	-2.11496	0.340101	-6.21862	5.01559e-10	3.48277e-07
chr12	26469214	26479837	+	Cmpk2	176.935	1.23035	0.313306	3.92699	8.6014e-05	0.00731353
chr12	76404175	76406936	+	Hspa2	169.165	-1.2666	0.330612	-3.83107	0.000127589	0.00927685
chr12	103450897	103457223	-	Ifi27l2b	353.472	1.56137	0.34889	4.47525	7.63236e-06	0.00118639
chr12	104406707	104414329	+	Serpina3n	75.6643	-2.00816	0.463903	-4.32884	1.499e-05	0.00199319
chr12	110691035	110696395	-	Hsp90aa1	117.053	1.12183	0.247365	4.53511	5.75743e-06	0.000946871
chr13	23684198	23692480	+	Hist1h2bc	715.563	-1.3632	0.345782	-3.94236	8.06848e-05	0.00715233
chr13	33964658	33988465	+	Nqo2	153.624	0.730137	0.165745	4.40517	1.05702e-05	0.00146797
chr13	36867177	37050244	-	F13a1	18.3104	-2.04208	0.530057	-3.85257	0.000116885	0.00880089
chr13	49187546	49196251	+	Ninj1	86.1937	-1.02993	0.2638	-3.90419	9.45408e-05	0.00777411
chr13	55319222	55321980	-	Rab24	179.523	-1.19177	0.26073	-4.57091	4.85609e-06	0.000854056
chr13	56609602	56639339	+	Tgfbi	1117.4	0.955297	0.247471	3.86024	0.000113274	0.00863301
chr13	66932829	66998401	+	Ptdss1	561.049	0.846901	0.190015	4.45702	8.31057e-06	0.00122875
chr13	99898482	99900683	-	Cartpt	18.0193	-5.16249	1.08742	-4.74749	2.05958e-06	0.00045969
chr13	111425679	111490041	-	Gpbp1	405.094	0.65877	0.163696	4.02435	5.71335e-05	0.00536926
chr14	37102139	37110101	-	2610528A11Rik	93.3156	-2.45985	0.461507	-5.33005	9.81882e-08	4.38305e-05
chr14	50944302	50953412	+	Pnp	499.173	0.813379	0.182389	4.45958	8.21213e-06	0.00122875
chr14	54431603	54441258	+	Mmp14	237.329	-0.995549	0.256224	-3.88546	0.000102138	0.00813134
chr14	63198914	63245260	-	Gata4	152.442	7.10996	1.40228	5.07029	3.97212e-07	0.000124521
chr14	70554055	70573548	+	Hr	91.287	1.46636	0.298169	4.91788	8.74847e-07	0.000248516
chr14	70654245	70766628	-	Xpo7	296.564	0.624465	0.1506	4.14651	3.37584e-05	0.00357581
chr15	10177237	10349180	+	Prlr	971.896	0.986518	0.179636	5.49175	3.97969e-08	1.91316e-05
chr15	77403788	77411080	-	Apol9a	27.6509	2.46248	0.601342	4.09498	4.22202e-05	0.00425572
chr15	80977764	81012290	+	Sgsm3	145.289	-0.925842	0.200825	-4.6102	4.02289e-06	0.00074094
chr16	4037144	4040024	+	Dnase1	141.097	5.59223	1.22899	4.55026	5.35799e-06	0.000904993
chr16	15887285	15889545	+	Cebpd	199.532	-1.93781	0.449816	-4.308	1.64737e-05	0.00212273
chr16	18620318	18622403	-	Gp1bb	232.718	-1.56717	0.309127	-5.06967	3.98499e-07	0.000124521
chr16	23609918	23614222	+	Rtp4	40.7516	1.85881	0.477769	3.8906	9.99949e-05	0.00801177
chr16	31296191	31314596	-	Apod	19.4	-3.36584	0.721647	-4.66411	3.09951e-06	0.000624852
chr16	35832877	35871382	-	Parp14	742.6	1.10799	0.286272	3.87041	0.000108654	0.00845849
chr17	27714446	27728951	-	Spdef	172.17	-0.773586	0.167279	-4.62454	3.75438e-06	0.000721938
chr17	28398752	28486149	-	Fkbp5	383.659	-1.8123	0.347161	-5.22035	1.78584e-07	6.76399e-05
chr17	34377131	34386028	+	Btnl1	518.128	1.31946	0.257079	5.13251	2.85908e-07	9.92655e-05
chr17	46016992	46032377	-	Vegfa	319.027	-1.28934	0.274503	-4.697	2.64007e-06	0.000540955
chr17	56751324	56757530	-	Nrtn	18.6836	-2.32005	0.590117	-3.9315	8.44159e-05	0.00727665
chr18	15389393	15403684	-	Aqp4	164.51	-1.29163	0.322846	-4.00075	6.31425e-05	0.00580308
chr18	73859386	73879134	+	Mro	20.4817	1.96304	0.505648	3.88223	0.000103504	0.00818796
chr19	4611783	4615667	-	Lrfn4	68.951	-1.28134	0.331817	-3.86159	0.000112653	0.00863301
chr19	24919915	24961616	-	Cbwd1	33.4564	1.24157	0.304785	4.0736	4.62923e-05	0.00448533
chr19	39688835	39741101	-	Cyp2c68	47.7541	2.53714	0.478844	5.29847	1.16779e-07	4.8654e-05
chrX	8004200	8018492	-	Glod5	252.638	1.04824	0.227084	4.61608	3.91058e-06	0.000740581
chrX	10252358	10321024	+	Otc	305.645	1.1813	0.257703	4.58397	4.56237e-06	0.000826451
chrX	162411951	162643658	-	Reps2	258.737	0.900395	0.214575	4.19619	2.71444e-05	0.00302926

## Sheet: Supplementary Table 4
Supplementary table 4: Differentially expressed genes on chromosome 5 regulated in cis, trans, or both
Gene Name	PWDwt_C5wt_FC	PWDwt_C5wt_padj	B6wt_C5wt_FC	B6wt_C5wt_padj	Regulation
1700023E05Rik	-0.805064	0.0425474	6.61302	1.18984e-05	cis
4933404O12Rik	-1.87484	0.00230268	-0.66632	0.536393	trans
Abcb1b	0.0990498	0.93583	3.54982	0.000164846	cis
Abhd1	-1.10468	0.127997	4.3191	0.000261381	cis
Acad10	-0.951412	0.00058893	1.09598	0.00488117	both
Acad12	-0.344151	0.598076	1.7919	0.00651181	cis
Acox3	-0.0432246	0.925331	0.917163	0.00374177	cis
Afp	-3.0047	0.000642251	1.06529	0.515953	trans
Agfg2	0.88246	0.00685858	0.293718	0.576307	trans
Agpat9	-0.645803	0.00894325	-0.39905	0.248771	trans
Aldh2	-0.606962	0.0124084	1.2893	3.49964e-08	cis
Ankrd13a	-0.244228	0.318901	-0.830964	5.9187e-05	cis
Arap2	-0.120178	0.690955	-0.749521	0.000547601	cis
Atp8a1	-0.816256	0.00621914	-0.635805	0.104669	trans
B3glct	-0.576095	0.0569636	-1.23839	7.45969e-06	cis
Baiap2l1	1.37886	3.73749e-05	-0.0821065	0.911048	trans
Bhlha15	1.08704	0.000310396	0.0415074	0.952512	trans
Bmp3	0.670892	0.0757373	1.19879	0.00309391	cis
Bri3bp	-0.534956	0.114529	1.32831	8.13555e-05	cis
Bst1	-3.87802	0.000346866	-2.86991	0.040197	trans
Cacna2d1	-0.320858	0.513844	1.73451	0.000164846	cis
Ccl24	-2.08894	0.00295869	1.91789		trans
Cd36	-3.06697	8.58136e-06	-0.717849	0.56841	trans
Cgref1	-1.23917	4.55574e-05	0.185608	0.764856	trans
Chchd2	-0.167871	0.84394	-2.10528	0.000119131	cis
Cit	1.34628	0.00233834	0.172096	0.835175	trans
Cldn15	-0.865977	0.00330398	-0.240311	0.644867	trans
Cldn4	1.06494	0.00907668	0.749568	0.16714	trans
Coq5	-0.274056	0.45463	1.63608	1.75345e-07	cis
Cox6a1	-0.808168	0.00943356	-0.262483	0.621316	trans
Cxcl9	3.07161	7.3124e-07	-0.370647	0.682352	trans
Cyp3a13	-1.87548	1.52807e-05	-0.387498	0.631383	trans
D930016D06Rik	0.768153	0.381018	-1.77975	0.00454683	cis
Dao	-1.79766	0.00518363	1.0335	0.300705	trans
Dcun1d4	-1.24076	0.000252773	-1.13251	0.0061355	both
Dgkq	-0.866958	0.00106736	-0.458928	0.23735	trans
Eif2b1	-0.107328	0.78745	-0.814722	0.00340732	cis
Emilin1	-0.803559	0.00727292	0.0514874	0.945175	trans
Ept1	-0.34766	0.235979	-0.923737	0.00044918	cis
Fam222a	1.20147	0.0508477	2.28466	0.00324872	cis
Fbxl5	-0.757995	0.0041266	-0.855686	0.00488787	both
Fbxo21	0.39831	0.285523	0.995404	0.00845133	cis
Fgfrl1	1.02901	0.00136294	0.368985	0.445123	trans
Fosl2	0.450465	0.0261135	0.629182	0.00477391	cis
Fras1	0.1364	0.889742	3.76606	4.56571e-09	cis
Fry	0.764305	0.00535309	0.680836	0.0466416	trans
Galnt11	-0.688216	0.0205783	1.07197	0.00258622	cis
Gk2	-2.44938	1.20086e-06	-0.102624	0.943883	trans
Glt1d1	0.838551	0.238593	2.13611	0.00715522	cis
Gm13826	-0.920343	0.00481015	0.547503	0.271742	trans
Gm8615	-3.28441	3.15187e-05	-0.165748	0.940245	trans
Guf1	-0.582396	0.256777	-1.25346	0.00821513	cis
Hadhb	-0.973315	0.00297247	0.1966	0.771133	trans
Hgfac	-0.599288	0.109189	2.56478	2.12748e-14	cis
Hpd	1.01474		-6.56612	1.86489e-05	cis
Hsd17b13	-1.01849	0.0910699	1.93775	0.00251242	cis
Hvcn1	-0.617779	0.499526	-2.26642	0.00183845	cis
Igj	-1.58521	2.3849e-05	-1.86612	3.91318e-06	both
Kdr	-1.27352	0.00173069	-0.0861791	0.928448	trans
Kit	0.48383	0.0624496	0.937624	0.000414333	cis
Klhl5	-0.475709	0.303477	-1.3985	0.000220121	cis
Lap3	-1.05363	0.00465554	-0.618531	0.236514	trans
Letm1	-0.00366349	0.993478	0.817818	0.00018164	cis
Lias	-0.286159	0.596408	-1.59104	2.89529e-05	cis
Man2b2	-0.229687	0.366282	0.664301	0.00590812	cis
Mdh2	-0.869642	0.0030552	-0.249666	0.627945	trans
Med13l	0.420938	0.21604	0.916049	0.00715522	cis
Micall2	0.290407	0.527317	1.13505	0.00628707	cis
Mmp17	0.596626	0.341348	1.79115	0.00621916	cis
Mospd3	0.147216	0.7616	1.37414	0.000261381	cis
Mrfap1	0.321054	0.451907	-1.16087	0.000622943	cis
Oas1a	-0.626127	0.468817	-2.09747	0.00270041	cis
Ocm	2.67669		-5.98147	9.41077e-09	cis
Pclo	0.987625	0.159484	3.76938	0.000322202	cis
Pi4k2b	-0.885242	0.000897304	-0.832639	0.00961171	both
Pisd	-0.992924	0.000921361	0.290579	0.588945	trans
Plac8	-1.4511	2.38023e-09	-1.03441	0.000420553	both
Plbd2	-0.0222654	0.972472	1.90841	1.47215e-06	cis
Preb	-0.385021	0.325878	-1.16031	0.000414333	cis
Prkab1	0.752193	0.00459519	0.231554	0.602318	trans
Prkg2	-1.68561	8.03722e-07	-1.07408	0.0176481	trans
Rhbdd2	0.217455	0.701803	1.58329	0.000677475	cis
Rnf10	0.186059	0.426161	0.601871	0.00444073	cis
Rpl21	0.110059	0.905156	2.02362	0.00436255	cis
Rplp0	-0.0360013	0.943018	-1.4982	1.51813e-08	cis
Rundc3b	-0.678722	0.106465	-1.74535	1.29449e-06	cis
Scarb1	-1.7691	5.03176e-07	-0.198729	0.819448	trans
Sfswap	0.819305	0.00388335	0.499957	0.19008	trans
Slc2a9	-0.991488	0.0013545	0.389713	0.444428	trans
Slc34a2	2.32553	3.3943e-07	-0.521901	0.514658	trans
Slc4a2	0.339098	0.156254	1.06123	8.61894e-07	cis
Slc5a1	-2.43377	8.82797e-09	-0.877163	0.169517	trans
Slc5a6	-0.121083	0.844373	1.1934	0.00899032	cis
Slc7a1	0.223974	0.51596	0.816234	0.00715522	cis
Spp1	-3.06214	7.02981e-05	1.6306		trans
Srp72	-0.241529	0.343573	-0.653666	0.00499691	cis
Steap2	0.498589	0.499526	-2.11532	2.95961e-06	cis
Steap4	3.18088	0.00691319	0.20141	0.91934	trans
Stim2	0.157504	0.667559	0.904862	0.00212746	cis
Stx2	-1.59306	0.00886145	-0.33682	0.786114	trans
Sult1d1	-1.19104	7.91985e-05	-1.16779	0.000797974	both
Tlr6	0.381045	0.573778	3.81737	1.58892e-05	cis
Tmed5	-0.298725	0.475998	-1.14782	0.00044918	cis
Tmem120a	-0.947461	0.001274	-0.535716	0.199812	trans
Tmem184a	-0.750655	0.000669202	0.267357	0.475977	trans
Tnrc18	1.01891	0.00510501	1.10755	0.00909403	both
Ttc28	0.327988	0.575624	1.43463	0.00715522	cis
Ttyh3	1.09517	0.00456898	1.13692	0.0129601	trans
Ubc	-0.103864	0.900616	-1.81808	0.000349364	cis
Ugdh	-1.79524	5.52578e-13	0.156061	0.778735	trans
Ugt2b34	-1.10009	3.60639e-05	0.12554	0.824497	trans
Ugt2b35	-1.59711	1.41347e-09	0.525591	0.247481	trans
Ugt2b36	-1.90526	1.60492e-08	2.05529	8.90805e-06	both
Ugt2b5	-2.27748	4.08227e-06	2.81171	0.000394816	both
Vsig10	0.497352	0.0259559	0.664682	0.00836514	cis
Wsb2	-0.672209	0.00123904	-0.0950872	0.827143	trans
Zfand2a	0.113142	0.836476	1.48751	0.000110254	cis

## Sheet: Supplementary Table 5
Supplementary table 5: Candidate modifier genes differentially expressed between B6 or PWD chromosome 5
chr	start	end	strand	name	PWDwt_C5wt_log2FoldChange	PWDwt_C5wt_pvalue	PWDwt_C5wt_padj	C5wt_C5no_log2FoldChange	C5wt_C5no_pvalue	C5wt_C5no_padj	C5wt_C5ad_log2FoldChange	C5wt_C5ad_pvalue	C5wt_C5ad_padj	regulation
chr5	5664828	5694568	-	Steap2	0.498589	0.256904	0.499526	-0.0587187	0.880377		1.26429	0.000456044	0.0109714	cis
chr5	8490335	8622952	-	Rundc3b	-0.678722	0.0230078	0.106465	-0.281548	0.356315	0.816887	-0.0682033	0.822116	0.929861	both
chr5	8966047	8997146	-	Crot	-0.771132	0.00441119	0.0317589	0.064282	0.81246	0.957347	-0.172967	0.524261	0.782637	cis
chr5	21884453	22344705	-	Reln	-0.295237	0.224751	0.462257	-0.049452	0.837345	0.959973	-0.351141	0.150866	0.4362	cis
chr5	23787743	23820369	+	Rint1	-0.521142	0.00871011	0.052572	0.467424	0.0157629	0.425261	0.351614	0.0721231	0.295471	cis
chr5	24586749	24592486	+	Chpf2	-0.479902	0.0481708	0.175489	-0.334643	0.172597	0.713284	-0.203505	0.406822	0.700082	both
chr5	29229801	29378390	-	Lmbr1	0.18139	0.610655	0.796392	-0.42963	0.212071	0.742112	-0.214973	0.529362	0.785735	cis
chr5	30950065	30955095	+	Abhd1	-1.10468	0.029932	0.127997	-0.248711	0.630476	0.914777	-0.707805	0.179497	0.476017	cis
chr5	30951666	30960361	-	Preb	-0.385021	0.12511	0.325878	-0.0308697	0.900902	0.975096	0.073044	0.768586	0.909563	cis
chr5	31048639	31054633	+	Atraid	-0.148972	0.560078	0.763194	-0.224695	0.374047	0.824376	-0.434234	0.0905939	0.334712	cis
chr5	31494760	31511627	+	Gpn1	0.178916	0.581633	0.777534	0.416833	0.166325	0.711583	0.396585	0.190881	0.489877	cis
chr5	32239083	32364356	+	Plb1	0.842454	0.475737	0.702869	-0.13444	0.909383	0.976682	-0.761343	0.51923	0.778929	cis
chr5	35041552	35048436	+	Hgfac	-0.599288	0.0238364	0.109189	-0.201559	0.447919	0.842651	0.0934199	0.724596	0.891794	cis
chr5	36794866	36796754	-	Mrfap1	0.321054	0.215667	0.451907	0.0855856	0.732489	0.938093	-0.0223432	0.929327	0.972655	cis
chr5	47983154	48306282	+	Slit2	0.583521	0.149377	0.361109	-0.138379	0.708898	0.933374	0.098736	0.788617	0.917936	cis
chr5	64953094	64960034	-	Tlr6	0.381045	0.326401	0.573778	-0.0515811	0.887982	0.973971	-0.0131695	0.971435	0.989556	cis
chr5	65391496	65409207	+	Lias	-0.286159	0.348854	0.596408	-0.125212	0.678439	0.924416	-0.272368	0.374119	0.676443	cis
chr5	72203328	72298771	+	Atp10d	-0.42098	0.244849	0.486955	0.383622	0.274832	0.785443	0.864695	0.0126032	0.107101	cis
chr5	77016022	77061522	+	1700023E05Rik	-0.805064	0.00654531	0.0425474	0.234398	0.427312	0.836961	0.798949	0.00599507	0.0671809	cis
chr5	87000859	87013274	+	Ugt2b35	-1.59711	1.22704e-11	1.41347e-09	0.331922	0.164181	0.710215	-0.053234	0.825992	0.932061	both
chr5	87065926	87092555	-	Ugt2b36	-1.90526	1.79284e-10	1.60492e-08	-0.0395258	0.897042	0.974261	-0.674904	0.03115	0.183264	both
chr5	87324971	87337195	-	Ugt2a3	-2.37881	0.0502872	0.180333	0.0060127	0.996054	0.999053	-0.466228	0.701433	0.879048	cis
chr5	87513338	87538195	-	Sult1b1	-0.620276	0.00457875	0.0326802	0.188615	0.388193	0.83067	-0.449665	0.0404037	0.211969	cis
chr5	88565039	88642704	+	Rufy3	0.0919438	0.667617	0.83242	-0.180345	0.3836	0.827689	-0.466538	0.0279716	0.171532	cis
chr5	92359544	92363277	-	Cxcl11	0.307023	0.625777	0.805799	0.706093	0.230849		0.448841	0.45094	0.732632	cis
chr5	96373954	96784728	+	Fras1	0.1364	0.765676	0.889742	-0.42777	0.348392	0.813505	-0.45648	0.317641	0.62551	cis
chr5	100846228	100899102	+	Agpat9	-0.645803	0.000839558	0.00894325	0.37558	0.0510706	0.541705	-0.274754	0.157986	0.447241	cis
chr5	103989764	104021796	-	Hsd17b11	-0.576862	0.00716896	0.045526	0.0565351	0.792063	0.95173	-0.269266	0.209986	0.516157	cis
chr5	113793728	113800352	-	Tmem119	-0.642439	0.0342517	0.140236	-0.556524	0.073061	0.60185	-0.598152	0.0561144	0.257483	both
chr5	114165517	114250758	+	Acacb	0.626325	0.144442	0.354077	-0.817811	0.0489118	0.536938	-0.021369	0.957365	0.984419	cis
chr5	114444305	114460590	+	Mvk	0.242502	0.41756	0.657645	-0.928712	0.00193592	0.219758	-0.728076	0.0148604	0.117838	cis
chr5	114775139	114805820	+	Ankrd13a	-0.244228	0.121101	0.318901	-0.0788135	0.615203	0.910409	-0.281437	0.0740949	0.300204	cis
chr5	115279701	115296972	+	Coq5	-0.274056	0.21871	0.45463	-0.209316	0.344998	0.813505	-0.141678	0.523561	0.782102	cis
chr5	115559466	115563729	+	Rplp0	-0.0360013	0.8708	0.943018	-0.261534	0.235135	0.76051	0.0838574	0.702739	0.880086	cis
chr5	117319265	117355006	+	Vsig10	0.497352	0.00335191	0.0259559	0.128024	0.434233	0.837768	-0.18331	0.267263	0.581564	both
chr5	120458201	120472763	-	Sdsl	-0.872301	0.0290059	0.12508	-0.471747	0.254427	0.775062	-0.10311	0.800605	0.921161	both
chr5	120753097	120777659	-	Oas3	-0.141007	0.656977	0.825876	-0.683531	0.0318507	0.484576	-1.29973	5.97862e-05	0.00251596	cis
chr5	123015073	123030452	+	Orai1	0.46715	0.0772122	0.238837	-0.572277	0.0267673	0.470645	-0.173356	0.498328	0.764528	cis
chr5	123171806	123182686	-	Hpd	1.01474	0.542466		-0.664581	0.690115		-1.49837	0.368821		cis
chr5	124004640	124032260	-	Vps37b	-0.506165	0.0372951	0.148302	-0.111264	0.646863	0.917409	0.33704	0.160938	0.450917	cis
chr5	124345438	124354628	-	Cdk2ap1	0.144133	0.766523	0.889885	0.0786643	0.864138		0.563932	0.212487	0.518077	cis
chr5	124540790	124550503	+	Tmed2	-0.190034	0.320478	0.568623	0.335076	0.0720818	0.598905	0.289767	0.121641	0.389915	cis
chr5	124570213	124579057	-	Eif2b1	-0.107328	0.596741	0.78745	-0.0480698	0.806354	0.955891	0.114929	0.556945	0.801105	cis
chr5	125385964	125390017	-	Ubc	-0.103864	0.786373	0.900616	-0.281246	0.460894	0.848085	-0.283654	0.458123	0.737593	cis
chr5	125441567	125460885	+	Bri3bp	-0.534956	0.0255493	0.114529	-0.116424	0.627024	0.913562	-0.243054	0.312235	0.620059	cis
chr5	125475872	125517403	+	Aacs	0.0579731	0.846401	0.930703	-0.604658	0.0431149	0.523201	-0.309522	0.299709	0.608124	cis
chr5	129725074	129758325	+	Gbas	0.394413	0.0328947	0.136276	-0.111165	0.519587	0.875578	-0.444119	0.0126318	0.107101	cis
chr5	129881160	129887470	-	Chchd2	-0.167871	0.68837	0.84394	-0.0147776	0.971628	0.993066	-0.0536139	0.89757	0.960656	cis
chr5	137378636	137477064	-	Zan	1.92641	0.0325871	0.135377	-1.3265	0.0654305		-0.479598	0.463078	0.740485	cis
chr5	137662821	137684693	-	Agfg2	0.88246	0.000598626	0.00685858	-0.607193	0.0115135	0.399056	-0.67073	0.00581675	0.0659344	cis
chr5	137745968	137768453	+	Tsc22d4	0.522851	0.00568826	0.038265	-0.565652	0.0023535	0.23905	-0.539559	0.00380184	0.0488033	cis
chr5	139471215	139484491	-	Zfand2a	0.113142	0.673853	0.836476	0.0120483	0.963598	0.991562	-0.323958	0.224404	0.531227	cis
chr5	140340302	140389247	-	Snx8	-0.692557	0.101696	0.285134	0.151717	0.719206	0.936324	-0.478293	0.26933	0.58403	cis
chr5	144019806	144050609	-	Ocm	2.67669	0.0658388		-0.490785	0.662131		-2.20234	0.130135		cis
chr5	144545886	144557478	+	Nptx2	-0.800369	0.120845	0.318369	-0.392161	0.46995		1.68965	0.000430813	0.0105746	cis
chr5	146832889	146837032	+	Rpl21	0.110059	0.7965	0.905156	-0.231724	0.580409	0.89447	-0.189184	0.652632	0.853451	cis
chr5	149616844	149636315	-	Hsph1	0.269238	0.435299	0.671499	1.43886	1.96522e-05	0.0406015	1.84427	4.31327e-08	5.99011e-06	both
chr5	149678256	149762599	+	B3glct	-0.576095	0.00979038	0.0569636	-0.154314	0.492414	0.865004	0.0348079	0.876388	0.951845	both

## Sheet: Supplementary Table 6
Supplementary Table 6: Polymorphisms in human orthologs of mouse genes located on chromosome 5, polymorphic between B6 and PWD, and expressed in the intestine
mouseGene	humanGene	chr	pos	ref	alt	effect	tcga_homRef	tcga_het	tcga_homAlt	snpId	filter	InbreedingCoeff	ExAc_AF	1000G_AF	EAS_AF	AMR_AF	AFR_AF	EUR_AF	SAS_AF	dbSNP_AF	TCGA_AF	pvalue_1000G_AF	pvalue_EAS_AF	pvalue_AMR_AF	pvalue_AFR_AF	pvalue_EUR_AF	pvalue_SAS_AF	padj_1000G_AF	padj_EAS_AF	padj_AMR_AF	padj_AFR_AF	padj_EUR_AF	padj_SAS_AF
Sh3tc1	SH3TC1	chr4	8229774	C	T	MODERATE	0/0=47	0/1=91	1/1=161	rs1281149	PASS	0.1256	0.365,0.635	0.524361,0.475639	0.4871,0.5129	0.4726,0.5274	0.8714,0.1286	0.2694,0.7306	0.3926,0.6074	0.5244,0.4756	0.690635451505017	0	3.06954461848363e-12	2.24087748357249e-09	0	0.0861972516979954	0.000842544253547794	0	8.44124770082998e-10	1.16749716894127e-06	0	1	0.240967656514669
Slc2a9	SLC2A9	chr4	9909923	G	A	MODERATE	0/0=91	0/1=140	1/1=69	rs2280205	PASS	0.0737	0.561991764,0.438	0.728834,0.271166	0.8006,0.1994	0.5922,0.4078	0.972,0.028	0.5159,0.4841	0.6421,0.3579	0.7288,0.2712	0.463333333333333	0	0	0.0444088719537705	0	0.420189019126022	3.27187607365165e-05	0	0	1	0	1	0.0117460351044094
Clip1	CLIP1	chr12	122812503	G	C	MODERATE	0/0=58	0/1=133	1/1=109	rs1129167	PASS	0.0898	0.438,0.562	0.59345,0.40655	0.6111,0.3889	0.4841,0.5159	0.9425,0.0575	0.3588,0.6412	0.4223,0.5777	0.5935,0.4065	0.585	0	2.37587727269783e-14	0.0127532216307995	0	0.0247750084952327	0.775443472326187	0	6.96132040900464e-12	1	0	1	1
Anapc4	ANAPC4	chr4	25408838	G	A	MODERATE	0/0=191	0/1=99	1/1=10	rs34811474	PASS	0.0529	0.843,0.157	0.9259185,0.0740815	1,0	0.8761,0.1239	0.9811,0.0189	0.7833,0.2167	0.9571,0.0429	0.9259,0.07408	0.198333333333333	0		0.000255304581034732	0	0.38187664492423	0	0	NA	0.106462010291483	0	1	0
Tlr1	TLR1	chr4	38800214	C	G	MODERATE	0/0=225	0/1=68	1/1=7	rs5743611	PASS	0.0633	0.931,0.069	0.9774361,0.0225639	1,0	0.987,0.013	0.9939,0.0061	0.9066,0.0934	0.998,0.002	0.9774,0.02256	0.136666666666667	0		0	0	0.00724291947644473	0	0	NA	0	0	1	0
Steap4	STEAP4	chr7	87913221	C	T	MODERATE	0/0=203	0/1=79	1/1=18	rs34741656	PASS	0.0395	0.857,0.143	0.9175319,0.0824681	0.997,0.003	0.8573,0.1427	0.9508,0.0492	0.8111,0.1889	0.9427,0.0573	0.9175,0.08247	0.191666666666667	0	0	0.0180710296004656	0	0.891235843932734	0	0	0	1	0	1	0
Tacc3	TACC3	chr4	1729556	G	A	MODERATE	0/0=199	0/1=89	1/1=12	rs34205238	PASS	0.0414	0.878,0.122	0.9357029,0.0642971	0.999,0.001	0.9063,0.0937	0.9879,0.0121	0.8439,0.1561	0.9151,0.0849	0.9357,0.0643	0.188333333333333	0	0	8.29534876345406e-07	0	0.0947463335888099	1.47485734736108e-09	0	0	0.000405642554532904	0	1	7.12356098775402e-07
Micall2	MICALL2	chr7	1479642	C	A	MODERATE	0/0=275	0/1=23	1/1=2	rs112889477	PASS	0.0142	0.981,0.019	0.99420927,0.00579073	1,0	0.9928,0.0072	0.9992,0.0008	0.9821,0.0179	0.9949,0.0051	0.9942,0.005791	0.045	0		1.26268783797734e-05	7.061018436616e-14	0.00145618746527165	4.76803936333425e-08	0	NA	0.00589675220335418	2.49960052656206e-11	0.744111794753813	2.17899398904375e-05
Micall2	MICALL2	chr7	1487278	G	A	MODERATE	0/0=284	0/1=16	1/1=0	rs146108745	PASS	-0.0146	0.993728,6.272e-03	0.99860224,0.00139776	1,0	1,0	1,0	0.997,0.003	0.9959,0.0041	0.9986,0.001398	0.0266666666666667	0				2.22063875787715e-05	0.000100567958400077	0	NA	NA	NA	0.0121024812304305	0.0341931058560262
Afap1	AFAP1	chr4	7780582	C	T	MODERATE	0/0=160	0/1=110	1/1=30	rs41264705	PASS	0.0560	0.78,0.220	0.889377,0.110623	0.9385,0.0615	0.8545,0.1455	0.9894,0.0106	0.7008,0.2992	0.9223,0.0777	0.8894,0.1106	0.283333333333333	0	0	1.22680465786118e-09	0	0.499258725595735	0	0	0	6.4407244537712e-07	0	1	0
Lmtk2	LMTK2	chr7	97822115	T	A	MODERATE	0/0=80	0/1=133	1/1=87	rs11765552	PASS	0.1331	0.598991764,0.401	0.776158,0.223842	0.8472,0.1528	0.6844,0.3156	0.9644,0.0356	0.4881,0.5119	0.8098,0.1902	0.7762,0.2238	0.511666666666667	0	0	8.03357380618763e-13	0	0.992779554421288	0	0	0	4.38633129817845e-10	0	1	0
Cwh43	CWH43	chr4	49063872	C	A	MODERATE	0/0=35	0/1=123	1/1=142	rs1051447	PASS	0.1195	0.352,0.648	0.523363,0.476637	0.6319,0.3681	0.2464,0.7536	0.8033,0.1967	0.2525,0.7475	0.5082,0.4918	0.5234,0.4766	0.678333333333333	0	0	0.00267471541914622	0	0.00277264564771471	4.12558875950708e-13	0	0	1	0	1	2.12055262238664e-10
Kmt2c	KMT2C	chr7	151970931	G	A	MODERATE	0/0=5	0/1=184	1/1=111	rs56850341	InbreedingCoeff_Filter	-0.9930	0.501,0.499	0.546526,0.453474	0.5357,0.4643	0.5461,0.4539	0.5726,0.4274	0.5368,0.4632	0.5327,0.4673	0.5465,0.4535	0.676666666666667	0	2.22044604925031e-16	8.88178419700125e-16	0	0	4.44089209850063e-16	0	6.92779167366097e-14	4.9382720135327e-13	0	0	2.37143638059934e-13
Micall2	MICALL2	chr7	1482101	C	G	MODERATE	0/0=237	0/1=55	1/1=8	rs12540098	PASS	0.1014	0.85593299,0.144	0.793331,0.206669	0.9603,0.0397	0.7075,0.2925	0.5514,0.4486	0.8946,0.1054	0.9049,0.0951	0.7933,0.2067	0.118333333333333	2.76392344407934e-07	1.7964534304582e-09	2.050481705868e-14	3.33577394846123e-45	0.423358231448399	0.142078275020616	0.000116913961684556	4.41927543892717e-07	1.13186590163914e-11	1.43438279783833e-42	1	1
Fras1	FRAS1	chr4	79434685	T	G	MODERATE	0/0=223	0/1=69	1/1=8	rs35933858	PASS	0.0464	0.862,0.138	0.9203275,0.0796725	0.998,0.002	0.8977,0.1023	0.9312,0.0688	0.8181,0.1819	0.9468,0.0532	0.9203,0.07967	0.141666666666667	3.21867581476454e-07	0	0.030096820168491	2.8518293992974e-07	0.0364463414492014	1.37654554421829e-09	0.000135828119383064	0	1	6.44513444241212e-05	1	6.66248043401652e-07
Fras1	FRAS1	chr4	78987157	A	G	MODERATE	0/0=99	0/1=137	1/1=64	rs4859905	PASS	0.0335	0.554,0.446	0.448482,0.551518	0.4593,0.5407	0.5346,0.4654	0.2481,0.7519	0.5805,0.4195	0.5112,0.4888	0.4485,0.5515	0.441666666666667	3.36573884388499e-07	0.000122348124025213	0.392524036939706	4.0380748985121e-40	0.385076382301104	0.0686211203156541	0.000141697605327558	0.0199427442161097	1	1.69599145737508e-37	1	1
Ptpn13	PTPN13	chr4	87685796	T	G	MODERATE	0/0=242	0/1=54	1/1=4	rs10033029	PASS	0.0317	0.9239834,0.076	0.9478834,0.0521166	0.9911,0.0089	0.928,0.072	0.9682,0.0318	0.8797,0.1203	0.9601,0.0399	0.9479,0.05212	0.103333333333333	3.60680128208557e-07	0	0.0455811043049192	1.3430390133351e-10	0.300609891520751	5.81896932860815e-07	0.000151485653847594	0	1	4.0291170400053e-08	1	0.000248469990331568
Abcb1a	ABCB1	chr7	87229440	T	C	MODERATE	0/0=264	0/1=34	1/1=2	rs9282564	PASS	0.0439	0.924,0.076	0.9740415,0.0259585	1,0	0.9683,0.0317	0.9985,0.0015	0.9165,0.0835	0.9775,0.0225	0.974,0.02596	0.0633333333333333	3.87479220043119e-07		0.00696364632941537	0	0.140038199572485	3.83778813350943e-05	0.000162353793198067	NA	1	0	1	0.0137009036366287
Abcb1b	ABCB1	chr7	87229440	T	C	MODERATE	0/0=264	0/1=34	1/1=2	rs9282564	PASS	0.0439	0.924,0.076	0.9740415,0.0259585	1,0	0.9683,0.0317	0.9985,0.0015	0.9165,0.0835	0.9775,0.0225	0.974,0.02596	0.0633333333333333	3.87479220043119e-07		0.00696364632941537	0	0.140038199572485	3.83778813350943e-05	0.000162353793198067	NA	1	0	1	0.0137009036366287
Clock	CLOCK	chr4	56319244	G	T	MODERATE	0/0=290	0/1=5	1/1=5	rs6855837	PASS	0.2121	0.975,0.025	0.9167332,0.0832668	1,0	0.9769,0.0231	0.6982,0.3018	0.998,0.002	1,0	0.9167,0.08327	0.025	4.23286990059653e-07		0.82370556128488	1.36326837268556e-42	1.32768330149968e-05		0.000176510674854875	NA	1	5.82115595136734e-40	0.00727570449221825	NA
Kntc1	KNTC1	chr12	123102921	T	G	MODERATE	0/0=239	0/1=60	1/1=1	rs11837038	PASS	0.0196	0.905,0.095	0.9472843,0.0527157	0.997,0.003	0.9568,0.0432	0.9864,0.0136	0.9006,0.0994	0.8845,0.1155	0.9473,0.05272	0.103333333333333	5.51926715219864e-07	0	2.69385505509145e-05	0	0.800110234748851	0.454911719629227	0.000229601513531463	0	0.012283979051217	0	1	1
Clock	CLOCK	chr4	56325365	G	C	MODERATE	0/0=270	0/1=29	1/1=1	rs34897046	PASS	0.0123	0.965,0.035	0.980631,0.019369	0.999,0.001	0.9755,0.0245	0.9962,0.0038	0.9553,0.0447	0.9703,0.0297	0.9806,0.01937	0.0516666666666667	5.55830485193809e-07	1.99240623999231e-12	0.00992319562874977	7.4806827399243e-13	0.524634038455432	0.0268246883748531	0.000230669651355431	5.5189652847787e-10	1	2.51350940061456e-10	1	1
Fras1	FRAS1	chr4	79284694	C	T	MODERATE	0/0=103	0/1=131	1/1=66	rs6835769	PASS	0.0828	0.523,0.477	0.664537,0.335463	0.7996,0.2004	0.4438,0.5562	0.8722,0.1278	0.4443,0.5557	0.6278,0.3722	0.6645,0.3355	0.438333333333333	5.61147806665829e-07	0	2.35000518214277e-05	0	5.31478660276377e-06	0.00915757228926783	0.000232315191959653	0	0.0107630237342139	0	0.00292844741812284	1
Zbtb49	ZBTB49	chr4	4322670	C	T	MODERATE	0/0=272	0/1=27	1/1=1	rs34293093	PASS	0.0186	0.964,0.036	0.9824281,0.0175719	1,0	0.9741,0.0259	0.9955,0.0045	0.9463,0.0537	0.9898,0.0102	0.9824,0.01757	0.0483333333333333	6.29459494749796e-07		0.0314345050001967	2.65685251576997e-11	0.638424410169372	2.15964378114109e-06	0.000259966771331666	NA	1	8.20967427372921e-09	1	0.000874655731362142
0610040J01Rik	C4orf19	chr4	37592128	G	A	MODERATE	0/0=195	0/1=89	1/1=16	rs2973275	PASS	0.0297	0.802,0.198	0.871805,0.128195	0.9216,0.0784	0.8501,0.1499	0.9531,0.0469	0.7455,0.2545	0.8558,0.1442	0.8718,0.1282	0.201666666666667	7.03246491928766e-07	4.36983782492462e-13	0.0142849076250524	0	0.0156678436146923	0.00290181714132887	0.000289737554674652	1.24103394227859e-10	1	0	1	0.748668822462848
Sepsecs	SEPSECS	chr4	25125703	C	G	MODERATE	0/0=273	0/1=26	1/1=1	rs2302566	PASS	0.0259	0.933,0.067	0.88778,0.11222	0.8899,0.1101	0.8905,0.1095	0.8374,0.1626	0.9433,0.0567	0.8947,0.1053	0.8878,0.1122	0.0466666666666667	7.59231227570122e-07	1.19775842017537e-05	3.38242348864614e-05	1.36757262201441e-12	0.385063987261382	4.16288874947586e-05	0.00031204403453132	0.00216794274051742	0.0152547299337941	4.5266653788677e-10	1	0.0147366261731445
Eif2ak1	EIF2AK1	chr7	6080686	A	T	MODERATE	0/0=282	0/1=17	1/1=1	rs34909691	PASS	0.0172	0.98498353,0.015	0.99101438,0.00898562	1,0	0.9827,0.0173	0.9992,0.0008	0.9821,0.0179	0.9857,0.0143	0.991,0.008986	0.0316666666666667	7.70071491462687e-07		0.0919483579075713	6.80789202789356e-10	0.0752763677650043	0.0192359338186334	0.000315729311499702	NA	1	1.97428868808913e-07	1	1
Pigg	PIGG	chr4	533001	T	C	MODERATE	0/0=229	0/1=68	1/1=3	rs1127410	PASS	0.0289	0.85,0.150	0.791334,0.208666	0.7778,0.2222	0.9006,0.0994	0.6407,0.3593	0.8718,0.1282	0.8487,0.1513	0.7913,0.2087	0.123333333333333	7.71690926418097e-07	8.02419039088031e-07	0.170862950639038	2.61988988666558e-26	0.776454489674636	0.120863579915979	0.000315729311499702	0.000165298322052134	1	1.05319573443956e-23	1	1
Abcb1a	ABCB1	chr7	87160618	A	T,C	MODERATE	0/0=62	0/1=3|0/2=121	1/1=0|2/2=114	rs2032582	PASS	0.1342	0.42,0.037,0.543	0.334265,0.048722,0.617013	0.3978,0.1339,0.4683	0.3689,0.0591,0.572	0.0196,0.0008,0.9796	0.4095,0.0179,0.5726	0.592,0.0501,0.3579	0.3343,0.04872,0.617	0.005,0.581666666666667	8.13089009550001e-07,0.0929565241792222	4.42691812145461e-19,1.09147775610996e-05	8.6108662515244e-08,0.725631353995027	0.0630359066806203,6.74109686597175e-117	0.0277298239373365,0.722083805257984	1.10488288621625e-06,0	0.0003317403158964,1	1.45202914383711e-16,0.0020132840893794	4.35709832327135e-05,1	1,3.17505662387269e-114	1,1	0.000461841046438393,0
Abcb1b	ABCB1	chr7	87160618	A	T,C	MODERATE	0/0=62	0/1=3|0/2=121	1/1=0|2/2=114	rs2032582	PASS	0.1342	0.42,0.037,0.543	0.334265,0.048722,0.617013	0.3978,0.1339,0.4683	0.3689,0.0591,0.572	0.0196,0.0008,0.9796	0.4095,0.0179,0.5726	0.592,0.0501,0.3579	0.3343,0.04872,0.617	0.005,0.581666666666667	8.13089009550001e-07,0.0929565241792222	4.42691812145461e-19,1.09147775610996e-05	8.6108662515244e-08,0.725631353995027	0.0630359066806203,6.74109686597175e-117	0.0277298239373365,0.722083805257984	1.10488288621625e-06,0	0.0003317403158964,1	1.45202914383711e-16,0.0020132840893794	4.35709832327135e-05,1	1,3.17505662387269e-114	1,1	0.000461841046438393,0
Eif2ak1	EIF2AK1	chr7	6066450	T	C	MODERATE	0/0=269	0/1=30	1/1=1	rs2640	PASS	0.0899	0.912,0.088	0.879193,0.120807	0.6677,0.3323	0.9438,0.0562	0.9894,0.0106	0.9394,0.0606	0.8405,0.1595	0.8792,0.1208	0.0533333333333333	8.56024100368394e-07	5.03305091373428e-38	0.821346750229111	1.35413678048479e-08	0.546338565244638	2.6175252433275e-10	0.000347545784749568	1.84209663442675e-35	1	3.5342969970653e-06	1	1.28258736923047e-07
C530008M17Rik	KIAA1211	chr4	57180473	C	A	MODERATE	0/0=113	0/1=139	1/1=48	rs6823339	PASS	0.1555	0.744,0.256	0.70607,0.29393	0.9325,0.0675	0.7161,0.2839	0.6384,0.3616	0.5905,0.4095	0.6759,0.3241	0.7061,0.2939	0.391666666666667	8.80622837540201e-07	0	4.1448491167273e-05	0.206079675819037	0.480876859528127	0.00629359729731993	0.000356652249203781	0	0.0185689240429383	1	1	1
Lrwd1	LRWD1	chr7	102108263	A	G	MODERATE	0/0=254	0/1=45	1/1=1	rs35310665	PASS	-0.0404	0.978,0.022	0.9636581,0.0363419	1,0	0.9582,0.0418	0.9539,0.0461	0.9294,0.0706	0.9785,0.0215	0.9637,0.03634	0.0783333333333333	9.04364665599289e-07		0.00531776815240881	0.00445339327356331	0.565592241979612	6.81217768860876e-08	0.000365363324902113	NA	1	0.467606293724148	1	3.08591649293977e-05
Pigg	PIGG	chr4	527677	T	C	MODERATE	0/0=229	0/1=68	1/1=3	rs34623004	PASS	0.0284	0.85,0.150	0.792133,0.207867	0.7788,0.2212	0.902,0.098	0.6407,0.3593	0.8738,0.1262	0.8487,0.1513	0.7921,0.2079	0.123333333333333	9.45237558536989e-07	1.00189166729634e-06	0.14597978809144	2.61988988666558e-26	0.866608006672474	0.120863579915979	0.000380930736090407	0.000204385900128453	1	1.05319573443956e-23	1	1
2410131K14Rik	C12orf49	chr12	117175608	C	T	MODERATE	0/0=281	0/1=19	1/1=0	rs73220422	PASS	0.0125	0.981,0.019	0.9908147,0.0091853	1,0	0.9885,0.0115	0.9992,0.0008	0.9672,0.0328	0.9959,0.0041	0.9908,0.009185	0.0316666666666667	1.16268203531611e-06		0.0113466174258723	6.80789202789356e-10	0.901209170209063	9.22079720866442e-06	0.000467398178197076	NA	1	1.97428868808913e-07	1	0.00349468214208382
Ulk1	ULK1	chr12	132403161	A	G	MODERATE	0/0=7	0/1=3	1/1=288	rs11609348	PASS	0.0582	0.003,0.997	0.00778800000000002,0.992212	0,1	0,1	0.0295,0.9705	0,1	0,1	0.007788,0.9922	0.971476510067114	1.500753709573e-06	7.01830189626742e-08	7.50636404926207e-06	0.906416254231556	7.22888090652407e-08	1.09373288835997e-07	0.000601802237538773	1.60590532365651e-05	0.0035430038312517	1	4.05540218856e-05	4.85617402431827e-05
Kntc1	KNTC1	chr12	123057792	A	G	MODERATE	0/0=272	0/1=27	1/1=1	rs61751322	PASS	0.0253	0.95,0.050	0.9816294,0.0183706	1,0	0.9669,0.0331	0.997,0.003	0.9384,0.0616	0.9969,0.0031	0.9816,0.01837	0.0483333333333333	1.81089252326849e-06		0.163990147947609	1.31183952589708e-12	0.265867787151146	6.1954108510065e-10	0.000724357009307396	NA	1	4.35530722597831e-10	1	3.01096967358916e-07
Akap9	AKAP9	chr7	91708898	A	G	MODERATE	0/0=236	0/1=57	1/1=7	rs35759833	PASS	0.0316	0.892,0.108	0.9345048,0.0654952	0.9673,0.0327	0.9395,0.0605	0.9864,0.0136	0.8748,0.1252	0.8885,0.1115	0.9345,0.0655	0.118333333333333	1.95826161841772e-06	1.44368961230157e-11	0.000237835211494009	0	0.684862796312106	0.678530752727755	0.00078134638574867	3.88352505709122e-09	0.0996529536159898	0	1	1
Gbp4	GBP6	chr1	89844035	T	C	MODERATE	0/0=277	0/1=21	1/1=2	rs35837853	PASS	0.0816	0.921,0.079	0.897963,0.102037	0.7242,0.2758	0.866,0.134	0.9955,0.0045	0.9334,0.0666	0.9315,0.0685	0.898,0.102	0.0416666666666667	2.00473963386806e-06	3.60945496348601e-31	8.73400941435533e-09	1.99079730478502e-09	0.0375218298897653	0.0272137029770339	0.000797886374279488	1.29579433189148e-28	4.49801484839299e-06	5.57423245339806e-07	1	1
Gbp8	GBP6	chr1	89844035	T	C	MODERATE	0/0=277	0/1=21	1/1=2	rs35837853	PASS	0.0816	0.921,0.079	0.897963,0.102037	0.7242,0.2758	0.866,0.134	0.9955,0.0045	0.9334,0.0666	0.9315,0.0685	0.898,0.102	0.0416666666666667	2.00473963386806e-06	3.60945496348601e-31	8.73400941435533e-09	1.99079730478502e-09	0.0375218298897653	0.0272137029770339	0.000797886374279488	1.29579433189148e-28	4.49801484839299e-06	5.57423245339806e-07	1	1
Atraid	ATRAID	chr2	27435165	G	A	MODERATE	0/0=285	0/1=12	1/1=2	rs11556163	PASS	-0.0106	0.979,0.021	0.9195288,0.0804712	1,0	0.9611,0.0389	0.7284,0.2716	0.9851,0.0149	0.998,0.002	0.9195,0.08047	0.0267558528428094	2.3457933415516e-06		0.224949436916089	5.02127702308522e-36	0.0953034447034489	7.00735508507577e-06	0.000928934163254434	NA	1	2.08885124160345e-33	1	0.0027188537730094
Atg9b	ATG9B	chr7	150721090	G	A	MODERATE	0/0=281	0/1=19	1/1=0	rs117030356	PASS	-0.0103	0.983,0.017	0.99041534,0.00958466	1,0	0.9841,0.0159	0.9955,0.0045	0.9761,0.0239	0.9928,0.0072	0.9904,0.009585	0.0316666666666667	2.54415268696739e-06		0.0603289570465819	1.08414968735815e-06	0.351181924465573	0.000212737178331146	0.00100494031135212	NA	1	0.000232008033094644	1	0.0693523201359536
Fam114a1	FAM114A1	chr4	38880046	T	C	MODERATE	0/0=159	0/1=111	1/1=30	rs11944159	PASS	0.0326	0.757,0.243	0.797125,0.202875	0.9137,0.0863	0.7939,0.2061	0.6808,0.3192	0.7525,0.2475	0.8824,0.1176	0.7971,0.2029	0.285	3.25972788117745e-06	0	0.000961832975097332	0.132527828786146	0.0980647138568993	0	0.00128433278518392	0	0.38569502301403	1	1	0
Sdad1	SDAD1	chr4	76878716	G	C	MODERATE	0/0=121	0/1=136	1/1=43	rs2242471	PASS	0.0646	0.659,0.341	0.721046,0.278954	0.9266,0.0734	0.7911,0.2089	0.7632,0.2368	0.5775,0.4225	0.5501,0.4499	0.721,0.279	0.37	3.30831559369749e-06	0	1.44180445360576e-10	1.56686885688373e-09	0.0379762078778952	0.00179471283142717	0.00130016802832311	0	7.6848177377187e-08	4.41857017641212e-07	1	0.4755989003282
Fras1	FRAS1	chr4	79295378	G	A	MODERATE	0/0=280	0/1=20	1/1=0	rs114077522	PASS	0.0088	0.981,0.019	0.9894169,0.0105831	1,0	0.9841,0.0159	0.9985,0.0015	0.9622,0.0378	0.998,0.002	0.9894,0.01058	0.0333333333333333	3.38473151062502e-06		0.040952041303578	1.18884324606938e-09	0.642634794024396	2.49028202725654e-07	0.00132681475216501	NA	1	3.38820325129773e-07	1	0.000107829211780208
Antxr2	ANTXR2	chr4	80905990	C	G	MODERATE	0/0=29	0/1=109	1/1=162	rs12647691	PASS	0.0333	0.23294196,0.767	0.197284,0.802716	0.0387,0.9613	0.1787,0.8213	0.2791,0.7209	0.3012,0.6988	0.1564,0.8436	0.1973,0.8027	0.721666666666667	3.49741653569446e-06	5.88320928388112e-44	1.8625705130993e-05	0.972294194725797	0.329888117531489	4.96755277535531e-09	0.00136748986545653	2.18855385360378e-41	0.00862370147564976	1	1	2.34965246274306e-06
Kdr	KDR	chr4	55972946	A	G	MODERATE	0/0=283	0/1=16	1/1=1	rs34231037	PASS	0.0073	0.978,0.022	0.99101438,0.00898562	1,0	0.9856,0.0144	0.9985,0.0015	0.9692,0.0308	0.998,0.002	0.991,0.008986	0.03	3.92378584690434e-06		0.0544130747875018	1.14387350702572e-08	0.928135918832627	1.35145204138709e-06	0.00153027648029269	NA	1	3.04270352868842e-06	1	0.000555446789010094
Scfd2	SCFD2	chr4	54011526	A	G	MODERATE	0/0=141	0/1=114	1/1=45	rs7675987	PASS	0.0235	0.695991764,0.304	0.747204,0.252796	0.7857,0.2143	0.7219,0.2781	0.8094,0.1906	0.6093,0.3907	0.7832,0.2168	0.7472,0.2528	0.34	4.4366425622222e-06	2.86641537172727e-08	0.0160487666462157	9.69668789707612e-13	0.041968085060585	6.96803676980551e-08	0.00172585395670444	6.73607612355908e-06	1	3.22899706972635e-10	1	3.13561654641248e-05
Shroom3	SHROOM3	chr4	77631425	T	A	MODERATE	0/0=223	0/1=71	1/1=6	rs3821979	PASS	0.0391	0.82,0.180	0.78095,0.21905	0.6637,0.3363	0.7968,0.2032	0.8389,0.1611	0.8907,0.1093	0.6994,0.3006	0.781,0.219	0.138333333333333	4.56503866153863e-06	2.62418753899685e-18	0.00210167351203535	0.200061356238967	0.0834230285378996	2.16448339154648e-13	0.00177123500067699	8.47612575095982e-16	0.814127943675114	1	1	1.12336688021262e-10
Lrwd1	LRWD1	chr7	102113226	C	T	MODERATE	0/0=274	0/1=24	1/1=2	rs148981077	PASS	0.0196	0.962,0.038	0.9818291,0.0181709	1,0	0.9798,0.0202	0.9992,0.0008	0.9583,0.0417	0.9652,0.0348	0.9818,0.01817	0.0466666666666667	4.71896679354877e-06		0.00739399728881596	2.24265050974282e-14	0.637102636180839	0.238990142974038	0.00182624014910337	NA	1	8.00626231978187e-12	1	1
Slc2a9	SLC2A9	chr4	9922130	C	T	MODERATE	0/0=197	0/1=83	1/1=20	rs3733591	PASS	0.1057	0.755,0.245	0.705871,0.294129	0.3155,0.6845	0.7925,0.2075	0.9607,0.0393	0.8091,0.1909	0.5961,0.4039	0.7059,0.2941	0.205	4.82415125074284e-06	3.22439541538122e-77	0.911758984205487	0	0.491217308447995	3.1370278228769e-16	0.00186212238278674	1.26073860741406e-74	1	0	1	1.67830988523914e-13
Abcb1a	ABCB1	chr7	87179809	C	T	MODERATE	0/0=278	0/1=22	1/1=0	rs2229109	PASS	0.0155	0.971,0.029	0.9874201,0.0125799	1,0	0.9755,0.0245	0.997,0.003	0.9672,0.0328	0.9908,0.0092	0.9874,0.01258	0.0366666666666667	5.032064908983e-06		0.201775775252188	3.13486414604824e-09	0.680192088805686	0.000135214961840324	0.00193734498995845	NA	1	8.55817911871169e-07	1	0.0452970122165085
Abcb1b	ABCB1	chr7	87179809	C	T	MODERATE	0/0=278	0/1=22	1/1=0	rs2229109	PASS	0.0155	0.971,0.029	0.9874201,0.0125799	1,0	0.9755,0.0245	0.997,0.003	0.9672,0.0328	0.9908,0.0092	0.9874,0.01258	0.0366666666666667	5.032064908983e-06		0.201775775252188	3.13486414604824e-09	0.680192088805686	0.000135214961840324	0.00193734498995845	NA	1	8.55817911871169e-07	1	0.0452970122165085
Nfxl1	NFXL1	chr4	47901476	G	A	MODERATE	0/0=148	0/1=128	1/1=24	rs12651301	PASS	0.0299	0.649,0.351	0.611222,0.388778	0.3998,0.6002	0.6585,0.3415	0.671,0.329	0.673,0.327	0.6513,0.3487	0.6112,0.3888	0.293333333333333	5.2389042303003e-06	1.08181168883079e-32	0.0638026340644517	0.119698899506887	0.159789806812501	0.0229196315782852	0.00200650032020501	3.90534019667915e-30	1	1	1	1
N4bp2	N4BP2	chr4	40103817	G	A	MODERATE	0/0=251	0/1=47	1/1=2	rs61748746	PASS	0.0133	0.932,0.068	0.956869,0.043131	0.9593,0.0407	0.9769,0.0231	0.966,0.034	0.9185,0.0815	0.9673,0.0327	0.9569,0.04313	0.085	5.33102676736341e-06	0.000216682784894173	5.43662765695174e-07	1.9616598567751e-06	0.805520163322357	6.22968548058545e-06	0.00203645222513282	0.0333691488737026	0.000268025743487721	0.000411948569922771	1	0.00245449607935067
N4bp2	N4BP2	chr4	40123790	T	G	MODERATE	0/0=251	0/1=47	1/1=2	rs61748749	PASS	0.0137	0.931991764,0.068	0.956869,0.043131	0.9593,0.0407	0.9769,0.0231	0.966,0.034	0.9185,0.0815	0.9673,0.0327	0.9569,0.04313	0.085	5.33102676736341e-06	0.000216682784894173	5.43662765695174e-07	1.9616598567751e-06	0.805520163322357	6.22968548058545e-06	0.00203645222513282	0.0333691488737026	0.000268025743487721	0.000411948569922771	1	0.00245449607935067
Mmp17	MMP17	chr12	132335592	G	A	MODERATE	0/0=186	0/1=100	1/1=13	rs11835665	PASS	0.0224	0.818,0.182	0.859026,0.140974	1,0	0.7939,0.2061	0.8215,0.1785	0.7833,0.2167	0.8885,0.1115	0.859,0.141	0.210702341137124	5.8064146464254e-06		0.839021544334111	0.0947973042119794	0.777185576737412	8.11367550923592e-08	0.00220643756564165	NA	1	1	1	3.63492662813769e-05
Rint1	RINT1	chr7	105205815	C	A	MODERATE	0/0=288	0/1=12	1/1=0	rs35531972	PASS	0.0150	0.989,0.011	0.99540735,0.00459265	1,0	0.9885,0.0115	0.9992,0.0008	0.9881,0.0119	0.998,0.002	0.9954,0.004593	0.02	5.9383735651064e-06		0.216219100337245	2.05100004713188e-06	0.195311206456723	0.000209421715430036	0.00225064358117533	NA	1	0.000426608009803431	1	0.0684809009456218
Mlxip	MLXIP	chr12	122618042	G	A	MODERATE	0/0=283	0/1=17	1/1=0	rs113336247	PASS	0.0061	0.979,0.021	0.99161342,0.00838658	1,0	0.9899,0.0101	0.9977,0.0023	0.9712,0.0288	0.9969,0.0031	0.9916,0.008387	0.0283333333333333	6.03001229970701e-06		0.0153588532843087	1.924857806479e-07	0.956732216883454	1.38363579005318e-05	0.00227934464928925	NA	1	4.4271729549017e-05	1	0.00523014328640102
Hps4	HPS4	chr22	26854441	G	A	MODERATE	0/0=7	0/1=46	1/1=247	rs1894706	PASS	0.0822	0.118,0.882	0.172524,0.827476	0.1954,0.8046	0.2406,0.7594	0.2549,0.7451	0.0616,0.9384	0.1033,0.8967	0.1725,0.8275	0.9	6.03048516878424e-06	4.43511299019761e-07	3.31650262808125e-11	7.54951656745106e-15	0.00495165141180536	0.833493007434638	0.00227934464928925	9.27665318005749e-05	1.78096191127963e-08	2.72537548084983e-12	1	1
Rbm19	RBM19	chr12	114374887	T	A,C	MODERATE	0/0=240	0/1=14|0/2=41	1/1=1|2/2=4	rs2290787	PASS	0.0634	0.87,0.024,0.106	0.8073083,0.0770767,0.115615	0.8115,0,0.1885	0.9265,0.0317,0.0418	0.6755,0.2731,0.0514	0.8867,0.003,0.1103	0.8149,0,0.1851	0.8073,0.07708,0.1156	0.0266666666666667,0.0816666666666667	6.08582312928106e-06,0.0127051201485602	1.88250519395083e-07,5.7328154903146e-09	0.592787070559257,0.00265883733353123	1.92910324640571e-36,0.0101085992273682	2.22063875787715e-05,0.0637931994330633	2.85240282060784e-07,1.58276138504281e-08	0.00228826949660968,1	4.0850362708733e-05,1.3758757176755e-06	1,1	8.04436053751181e-34,0.89966533123577	0.0121024812304305,1	0.000122938561568198,7.40732328200035e-06
Evc2	EVC2	chr4	5690902	T	C	MODERATE	0/0=202	0/1=88	1/1=10	rs4689278	PASS	0.0160	0.763,0.237	0.734824,0.265176	0.5972,0.4028	0.7104,0.2896	0.8086,0.1914	0.7903,0.2097	0.7372,0.2628	0.7348,0.2652	0.18	6.26313373685779e-06	1.94165363419441e-20	3.99733351975965e-06	0.553227837776834	0.148950941348093	0.000152749578124204	0.00234867515132167	6.50453967455127e-18	0.00191072542244511	1	1	0.0505601103591115
Idua	IDUA	chr4	996165	G	A	MODERATE	0/0=224	0/1=69	1/1=7	rs6831280	PASS	0.0319	0.821,0.179	0.782348,0.217652	0.7867,0.2133	0.8905,0.1095	0.7519,0.2481	0.834,0.166	0.6892,0.3108	0.7823,0.2177	0.138333333333333	6.35237710593002e-06	0.000182774819374369	0.115132149483145	5.36903092656384e-08	0.13901379257019	1.07139713454004e-14	0.00237578903761783	0.0288784214611503	1	1.30467451515501e-05	1	5.62483495633521e-12
Pigg	PIGG	chr4	520853	G	A	MODERATE	0/0=242	0/1=53	1/1=5	rs13114026	PASS	0.0099	0.862,0.138	0.821685,0.178315	0.7946,0.2054	0.9092,0.0908	0.7587,0.2413	0.8708,0.1292	0.8221,0.1779	0.8217,0.1783	0.105	6.39476695227875e-06	1.89976495635719e-07	0.390244902194596	3.9597754177986e-12	0.149047822602458	8.31866796973075e-05	0.00238524807319997	4.10349230573153e-05	1	1.27504768453115e-09	1	0.0283666577767819
Fras1	FRAS1	chr4	79295322	G	A	MODERATE	0/0=280	0/1=20	1/1=0	rs17459809	PASS	0.0081	0.981,0.019	0.9890176,0.0109824	1,0	0.9841,0.0159	0.997,0.003	0.9622,0.0378	0.998,0.002	0.989,0.01098	0.0333333333333333	6.66910760438455e-06		0.040952041303578	2.80587528767029e-08	0.642634794024396	2.49028202725654e-07	0.00248090802883105	NA	1	7.01468821917573e-06	1	0.000107829211780208
Psapl1	PSAPL1	chr4	7436239	C	T	MODERATE	0/0=214	0/1=70	1/1=14	rs56402179	PASS	0.0356	0.845,0.155	0.896565,0.103435	0.9236,0.0764	0.8718,0.1282	0.9849,0.0151	0.8091,0.1909	0.8569,0.1431	0.8966,0.1034	0.164429530201342	6.78594993486215e-06	4.64668021837866e-08	0.0653570881033256	0	0.18354754343019	0.251864994913481	0.00251758742583386	1.06873645022709e-05	1	0	1	1
Gpn1	GPN1	chr2	27851918	G	A	MODERATE	0/0=165	0/1=114	1/1=21	rs3749147	PASS	0.0382	0.775,0.225	0.816494,0.183506	0.6815,0.3185	0.7911,0.2089	0.9713,0.0287	0.7465,0.2535	0.8364,0.1636	0.8165,0.1835	0.26	6.85191739524527e-06	0.0130020043324295	0.0300304880213091	0	0.772759158120745	3.39790499004344e-06	0.00253520943624075	1	1	0	1	0.00135916199601738
Plb1	PLB1	chr2	28824793	C	G	MODERATE	0/0=56	0/1=154	1/1=90	rs7601771	PASS	0.0425	0.415991764,0.584	0.35024,0.64976	0.122,0.878	0.415,0.585	0.3343,0.6657	0.4235,0.5765	0.4857,0.5143	0.3502,0.6498	0.556666666666667	7.16320318696871e-06	5.63193652519511e-48	0.304333612166988	4.38872327802911e-06	0.437482980417611	0.101629016616457	0.00264322197599145	2.10071232389778e-45	1	0.000855801039215676	1	1
Zfp12	ZNF12	chr7	6731672	G	C	MODERATE	0/0=275	0/1=22	1/1=3	rs61731528	PASS	0.0096	0.975,0.025	0.9814297,0.0185703	1,0	0.964,0.036	0.997,0.003	0.9573,0.0427	0.9785,0.0215	0.9814,0.01857	0.0466666666666667	7.60119409748405e-06		0.334252273383869	4.01989552756277e-12	0.708246710857279	0.00515649198636003	0.00279723942787413	NA	1	1.29038646434765e-09	1	1
Ift172	IFT172	chr2	27682309	C	T	MODERATE	0/0=286	0/1=14	1/1=0	rs61747073	PASS	0.0010	0.987,0.013	0.9938099,0.0061901	1,0	0.9957,0.0043	0.9977,0.0023	0.9771,0.0229	0.998,0.002	0.9938,0.00619	0.0233333333333333	8.67609173815787e-06		0.0027000768418568	5.16004193840125e-06	0.955366975663308	3.92318390418644e-05	0.00318412566790394	NA	1	0.000995888094111441	1	0.0139273028598619
C530008M17Rik	KIAA1211	chr4	57181995	C	T	MODERATE	0/0=139	0/1=127	1/1=34	rs3796547	PASS	0.0247	0.705,0.295	0.757987,0.242013	0.746,0.254	0.7666,0.2334	0.8003,0.1997	0.66,0.34	0.8078,0.1922	0.758,0.242	0.325	9.38121815785564e-06	0.00217606149516847	0.000236556425105672	2.36950437049188e-09	0.53763807281435	2.3230766199589e-09	0.00343352584577516	0.280140175130299	0.0993536985443822	6.51613701885267e-07	1	1.11507677758027e-06
Wbscr27	WBSCR27	chr7	73249165	T	A	MODERATE	0/0=35	0/1=125	1/1=140	rs13246460	PASS	0.0388	0.336,0.664	0.41893,0.58107	0.4187,0.5813	0.3876,0.6124	0.5371,0.4629	0.2744,0.7256	0.4305,0.5695	0.4189,0.5811	0.675	9.75449610840506e-06	0.00018636013307316	0.0192048201431831	0	0.0311891278178474	3.04171427538691e-05	0.00356039107956785	0.0292585408924861	1	0	1	0.0109805885341467
Ncor2	NCOR2	chr12	124857033	C	T	MODERATE	0/0=285	0/1=8	1/1=5	rs7978237	PASS	0.0376	0.879991577,0.120	0.9193291,0.0806709	1,0	0.8487,0.1513	0.9168,0.0832	0.8767,0.1233	0.9335,0.0665	0.9193,0.08067	0.0302013422818792	1.01493898036789e-05		1.54510709128315e-13	1.67446184129088e-05	2.35670861880826e-10	0.00177952088509238	0.00369437788853912	NA	8.48263793114449e-11	0.00299728669591068	1.34568062133952e-07	0.473352555434573
Arap2	ARAP2	chr4	36081878	C	T	MODERATE	0/0=4	0/1=4	1/1=292	rs4833069	PASS	0.0105	0.00800000000000001,0.992	0.00479200000000002,0.995208	0,1	0.00719999999999998,0.9928	0.000800000000000023,0.9992	0.0139,0.9861	0.00409999999999999,0.9959	0.004792,0.9952	0.98	1.04351670515768e-05	6.58011695065564e-06	0.0437212078390008	2.05100004718688e-06	0.348582299472	0.00221638421333137	0.00378796563972238	0.00124364210367392	1	0.000426608009803431	1	0.580692663892819
Dhx37	DHX37	chr12	125438516	T	C	MODERATE	0/0=70	0/1=121	1/1=109	rs4516060	PASS	0.0426	0.366,0.634	0.344249,0.655751	0.1538,0.8462	0.3487,0.6513	0.5537,0.4463	0.4006,0.5994	0.1963,0.8037	0.3442,0.6558	0.565	1.11861508129214e-05	1.34922082815947e-35	0.00149392817108142	1.39700492951533e-06	0.175659470570855	2.56614992139048e-24	0.00404938659427755	4.91116381450047e-33	0.593089483919324	0.00029616504505725	1	1.41908090652894e-21
Slc8b1	SLC8B1	chr12	113758166	G	A	MODERATE	0/0=279	0/1=20	1/1=1	rs16942745	PASS	0.0340	0.944,0.056	0.9109425,0.0890575	0.8294,0.1706	0.964,0.036	0.9228,0.0772	0.9573,0.0427	0.8937,0.1063	0.9109,0.08906	0.0366666666666667	1.16023295760456e-05	1.52033939305754e-15	0.949024144448222	0.000805089540937493	0.552694620120218	7.24821312323961e-07	0.00418844097695246	4.71305211847837e-13	1	0.101441282158124	1	0.000307324236425359
Zfp518b	ZNF518B	chr4	10445207	T	C	MODERATE	0/0=283	0/1=16	1/1=1	rs75487798	PASS	0.0159	0.978,0.022	0.99041534,0.00958466	1,0	0.9928,0.0072	0.9992,0.0008	0.9662,0.0338	0.9918,0.0082	0.9904,0.009585	0.03	1.17644514510129e-05		0.00196389252833384	2.13842543672627e-09	0.677270372468494	0.000962988770443429	0.00423520252236464	NA	0.765918086050198	5.94482271409903e-07	1	0.26963685572416
Bod1l	BOD1L1	chr4	13605040	C	T	MODERATE	0/0=285	0/1=14	1/1=1	rs61995957	PASS	0.0057	0.985,0.015	0.99201278,0.00798722	1,0	0.9885,0.0115	0.9992,0.0008	0.9751,0.0249	0.9939,0.0061	0.992,0.007987	0.0266666666666667	1.36961818926196e-05		0.0436625693340795	2.10861528238127e-08	0.828193335557053	0.000711364140587145	0.00491692929945044	NA	1	5.41914127571986e-06	1	0.207718329051446
Fam220a	FAM220A	chr7	6370077	C	T	MODERATE	0/0=280	0/1=20	1/1=0	rs2241445	PASS	0.0540	0.944,0.056	0.9163339,0.0836661	0.8284,0.1716	0.9179,0.0821	0.9985,0.0015	0.9553,0.0447	0.8548,0.1452	0.9163,0.08367	0.0333333333333333	1.44193375081565e-05	1.56342562957322e-16	0.0002169573445094	1.18884324606938e-09	0.26336636409977	1.18351576527329e-12	0.00516212282792003	4.90915647685991e-14	0.0915559993829668	3.38820325129773e-07	1	6.04776556054651e-10
Emilin1	EMILIN1	chr2	27308159	G	A	MODERATE	0/0=283	0/1=17	1/1=0	rs36045790	PASS	0.0080	0.98,0.020	0.99101438,0.00898562	1,0	0.9914,0.0086	0.997,0.003	0.9712,0.0288	0.9939,0.0061	0.991,0.008986	0.0283333333333333	1.84327781753701e-05		0.0073426092132105	7.2483270607826e-07	0.956732216883454	0.00034349295181868	0.00658050180860712	NA	1	0.000158738362631139	1	0.107513293919247
Ddx51	DDX51	chr12	132626425	G	A	MODERATE	0/0=189	0/1=100	1/1=11	rs60927391	PASS	0.0609	0.77898344,0.221	0.713858,0.286142	0.8214,0.1786	0.7983,0.2017	0.4554,0.5446	0.8191,0.1809	0.7843,0.2157	0.7139,0.2861	0.203333333333333	1.853236820772e-05	0.219402155977154	0.941873431226508	2.27152042305714e-44	0.26690659435667	0.558900632195041	0.00659752308194832	1	1	9.74482261491513e-42	1	1
Btbd8	BTBD8	chr1	92554283	G	A	MODERATE	0/0=285	0/1=14	1/1=1	rs34856868	PASS	0.0176	0.978,0.022	0.9918131,0.0081869	1,0	0.987,0.013	1,0	0.9702,0.0298	0.998,0.002	0.9918,0.008187	0.0266666666666667	2.00199483371133e-05		0.0750242940613166		0.715664846301896	7.30081116029346e-06	0.00710708165967522	NA	1	NA	1	0.00281811310787328
Bmp3	BMP3	chr4	81967150	G	A	MODERATE	0/0=261	0/1=37	1/1=2	rs3733549	PASS	0.0422	0.896,0.104	0.872005,0.127995	0.873,0.127	0.8833,0.1167	0.9319,0.0681	0.9284,0.0716	0.7239,0.2761	0.872,0.128	0.0683333333333333	2.38514300594048e-05	0.000207437474712074	0.00298564576449688	0.984995119922446	0.804452789885524	7.38749872074273e-24	0.0084434062410293	0.0321528085803715	1	1	1	4.07789929384999e-21
Psapl1	PSAPL1	chr4	7436486	C	A	MODERATE	0/0=231	0/1=61	1/1=8	rs11548325	PASS	0.0343	0.84,0.160	0.79992,0.20008	0.7054,0.2946	0.7205,0.2795	0.8457,0.1543	0.8748,0.1252	0.8149,0.1851	0.7999,0.2001	0.128333333333333	2.51891983019825e-05	2.29887056290983e-14	2.65445699965345e-11	0.135413024029258	0.854939889481921	0.00307743922212367	0.00889178700059982	6.8046568662131e-12	1.43075232281321e-08	1	1	0.785901966457293
Cep135	CEP135	chr4	56874517	A	C	MODERATE	0/0=189	0/1=100	1/1=11	rs3214045	PASS	0.0282	0.791,0.209	0.860823,0.139177	0.9087,0.0913	0.8818,0.1182	0.913,0.087	0.7286,0.2714	0.862,0.138	0.8608,0.1392	0.203333333333333	2.60844170441032e-05	1.59141588795819e-10	2.78324877371894e-05	6.59250432022418e-13	0.00218337270486994	0.000644307448271597	0.00918171479952433	4.08993883205255e-08	0.012635949432684	2.22167395591555e-10	1	0.190070697240121
Tlr6	TLR6	chr4	38830736	A	G	MODERATE	0/0=289	0/1=11	1/1=0	rs5743808	PASS	0.0551	0.979,0.021	0.9400958,0.0599042	0.9137,0.0863	0.9841,0.0159	0.8858,0.1142	0.998,0.002	0.9499,0.0501	0.9401,0.0599	0.0183333333333333	2.61758784630171e-05	3.58532082229182e-08	0.735821948082132	2.37291826164724e-12	0.000412134705829015	0.00135971258693265	0.009187733340519	8.2820910994941e-06	1	7.80690108081942e-10	0.214310047031088	0.368482111058748
Tgfbr3	TGFBR3	chr1	92327045	G	A	MODERATE	0/0=240	0/1=50	1/1=10	rs1805110	PASS	0.0601	0.869,0.131	0.814097,0.185903	0.63,0.37	0.8588,0.1412	0.8245,0.1755	0.9155,0.0845	0.8538,0.1462	0.8141,0.1859	0.116666666666667	2.84877555142451e-05	3.93468319465984e-28	0.190408278955001	0.00102287441530649	0.0347068014813756	0.0955652415636643	0.00997071442998579	1.3810738013256e-25	1	0.124790678667392	1	1
Psapl1	PSAPL1	chr4	7435721	C	T	MODERATE	0/0=199	0/1=84	1/1=15	rs6850206	PASS	0.0285	0.833,0.167	0.870807,0.129193	0.9236,0.0764	0.8617,0.1383	0.8956,0.1044	0.8052,0.1948	0.8569,0.1431	0.8708,0.1292	0.191275167785235	2.88491318902739e-05	6.69175825862567e-12	0.0101816859775949	1.86762935561191e-07	0.862948498788797	0.0117263792664113	0.0100683470297056	1.81346648808756e-09	1	4.31422381146351e-05	1	1
Mphosph9	MPHOSPH9	chr12	123705962	C	T	MODERATE	0/0=277	0/1=21	1/1=2	rs36121382	PASS	0.0730	0.945,0.055	0.9075479,0.0924521	0.7321,0.2679	0.9337,0.0663	0.9576,0.0424	0.9513,0.0487	0.9571,0.0429	0.9075,0.09245	0.0416666666666667	3.03703043183922e-05	8.76142310600279e-30	0.0523436470478423	0.940910911088255	0.515429432801917	0.906075604056116	0.0105688659028005	3.10154377952499e-27	1	1	1	1
Zfp644	ZNF644	chr1	91404256	C	A	MODERATE	0/0=282	0/1=18	1/1=0	rs41286761	PASS	0.0121	0.978,0.022	0.9898163,0.0101837	1,0	0.9827,0.0173	0.9992,0.0008	0.9672,0.0328	0.9949,0.0051	0.9898,0.01018	0.03	3.16903528387869e-05		0.130094483424761	2.13842543672627e-09	0.756882852892161	6.13438622030227e-05	0.0109965524350591	NA	1	5.94482271409903e-07	1	0.0211636324600428
Lrrc8c	LRRC8C	chr1	90179041	A	C	MODERATE	0/0=290	0/1=10	1/1=0	rs72712583	PASS	0.0104	0.989,0.011	0.99620607,0.00379393	1,0	0.9928,0.0072	0.9992,0.0008	0.9871,0.0129	1,0	0.9962,0.003794	0.0166666666666667	3.26180782006524e-05		0.112589177504883	2.0272952880207e-05	0.538615075695597		0.0112858550574257	NA	1	0.00358831265979664	1	NA
Sun1	SUN1	chr7	881668	C	T	MODERATE	0/0=95	0/1=144	1/1=61	rs6461378	PASS	0.0237	0.534,0.466	0.467053,0.532947	0.3601,0.6399	0.5562,0.4438	0.3767,0.6233	0.5676,0.4324	0.5327,0.4673	0.4671,0.5329	0.443333333333333	3.27862783361081e-05	1.43946000052275e-14	0.986556052429753	1.59730159854384e-13	0.669100513494446	0.35362358507559	0.0113112660259573	4.27519620155257e-12	1	5.51069051497625e-11	1	1
Fry	FRY	chr13	32776616	T	A	MODERATE	0/0=273	0/1=26	1/1=1	rs61750791	PASS	0.0830	0.928,0.072	0.9011581,0.0988419	0.7351,0.2649	0.9611,0.0389	0.997,0.003	0.9642,0.0358	0.8354,0.1646	0.9012,0.09884	0.0466666666666667	3.27900010089912e-05	7.8473828439122e-28	0.489790536964879	4.01989552756277e-12	0.281538176799466	2.47954930722259e-12	0.0113112660259573	2.74658399536927e-25	1	1.29038646434765e-09	1	1.2620905973763e-09
Fam220a	FAM220A	chr7	6370575	C	T	MODERATE	0/0=223	0/1=72	1/1=5	rs3750041	PASS	0.0275	0.846,0.154	0.792732,0.207268	0.8135,0.1865	0.8545,0.1455	0.7345,0.2655	0.8797,0.1203	0.7168,0.2832	0.7927,0.2073	0.136666666666667	4.35485346511585e-05	0.00972051213797755	0.649278079956291	3.73270322068766e-10	0.33968061027257	1.57728483005057e-11	0.0149371473853474	1	1	1.09741474688217e-07	1	7.85487845365184e-09
Rest	REST	chr4	57796900	G	A	MODERATE	0/0=264	0/1=34	1/1=2	rs2228991	PASS	0.0930	0.919,0.081	0.880791,0.119209	0.7976,0.2024	0.7478,0.2522	0.8737,0.1263	0.9672,0.0328	0.9816,0.0184	0.8808,0.1192	0.0633333333333333	4.47115902555229e-05	4.60467172607441e-14	6.48411137397976e-20	3.40927437495747e-05	0.00398050986023635	2.81820771497188e-06	0.0152913638673888	1.33995947228765e-11	3.69594348316846e-17	0.00548893174368153	1	0.00113573770913367
Ankib1	ANKIB1	chr7	92028039	C	A	MODERATE	0/0=65	0/1=154	1/1=81	rs38794	PASS	0.0305	0.487991727,0.512	0.560903,0.439097	0.5288,0.4712	0.4784,0.5216	0.7587,0.2413	0.4414,0.5586	0.5082,0.4918	0.5609,0.4391	0.526666666666667	4.58680729815697e-05	0.0314208899152126	0.855593272171277	0	0.213651546494685	0.178693336643379	0.0156410128867153	1	1	0	1	1
Gtf2ird2	GTF2IRD2	chr7	74211363	T	G	MODERATE	0/0=288	0/1=12	1/1=0	rs142434912	VQSRTrancheSNP99.60to99.80	0.0044	0.988,0.012	0.99460863,0.00539137	1,0	0.9942,0.0058	1,0	0.9841,0.0159	0.9928,0.0072	0.9946,0.005391	0.02	4.71910906045814e-05		0.0212627267421535		0.543623547351608	0.0237789355174713	0.0160449708055577	NA	1	NA	1	1
Slc30a9	SLC30A9	chr4	42003671	A	G	MODERATE	0/0=46	0/1=81	1/1=173	rs1047626	PASS	0.1547	0.263,0.737	0.371605,0.628395	0.0516,0.9484	0.232,0.768	0.8949,0.1051	0.2435,0.7565	0.2249,0.7751	0.3716,0.6284	0.711666666666667	6.09279578041022e-05	5.57330350682759e-40	0.0209283103644037	0	0.0476011409696058	0.00467456692108325	0.0206545776955906	2.05654899401938e-37	1	0	1	1
Pole	POLE	chr12	133253995	G	A	MODERATE	0/0=244	0/1=53	1/1=3	rs5744751	PASS	0.0192	0.914,0.086	0.9430911,0.0569089	0.8948,0.1052	0.9553,0.0447	0.9955,0.0045	0.8996,0.1004	0.9581,0.0419	0.9431,0.05691	0.0983333333333333	6.44070760129622e-05	0.660803061418807	0.000155831558185993	0	0.89358151315418	7.92280103256715e-06	0.0217695916923812	1	0.066228412229047	0	1	0.00304235559650579
Shroom3	SHROOM3	chr4	77675505	C	T	MODERATE	0/0=96	0/1=142	1/1=62	rs3733242	PASS	0.0437	0.53895882,0.461	0.470647,0.529353	0.4345,0.5655	0.5562,0.4438	0.3396,0.6604	0.6093,0.3907	0.4816,0.5184	0.4706,0.5294	0.443333333333333	6.7333843752901e-05	2.11290114004636e-06	0.986556052429753	2.83979498807157e-19	0.0380449998332628	0.00378277836540168	0.0226915053447276	0.000418354425729179	1	1.08480168544334e-16	1	0.934346256254215
Rest	REST	chr4	57797467	C	T	MODERATE	0/0=288	0/1=11	1/1=1	rs114282228	PASS	0.0166	0.986,0.014	0.99361022,0.00638978	1,0	0.9885,0.0115	1,0	0.9761,0.0239	1,0	0.9936,0.00639	0.0216666666666667	7.38393521573233e-05		0.148735837221033		0.773017800397855		0.0248100223248606	NA	1	NA	1	NA
Letm1	LETM1	chr4	1824020	C	T	MODERATE	0/0=281	0/1=19	1/1=0	rs28681468	PASS	0.0109	0.978991755,0.021	0.9882188,0.0117812	1,0	0.9827,0.0173	0.9909,0.0091	0.9732,0.0268	0.9918,0.0082	0.9882,0.01178	0.0316666666666667	8.4803791391197e-05		0.0919483579075713	0.000275316232352107	0.571481473147247	0.000486197034511582	0.028409270116051	NA	1	0.036066426438126	1	0.147803898491521
Gtf2ird2	GTF2IRD2	chr7	74212311	G	T	MODERATE	0/0=13	0/1=6	1/1=281	rs187868539	PASS	0.6437	0.07,0.930	0.103435,0.896565	0,1	0.0317,0.9683	0.3752,0.6248	0,1	0,1	0.1034,0.8966	0.946666666666667	9.64508654361929e-05	1.29984648559629e-13	0.0523052083814266	0	1.37288971191739e-13	2.95240783072577e-13	0.0322145890556884	3.74355787851732e-11	1	0	7.96276032912086e-11	1.52934725631595e-10
Gtf2ird2	GTF2IRD2	chr7	74212036	C	G	MODERATE	0/0=224	0/1=72	1/1=4	rs707394	PASS	0.0272	0.877991763,0.122	0.9147364,0.0852636	0.9831,0.0169	0.928,0.072	0.9493,0.0507	0.8559,0.1441	0.8487,0.1513	0.9147,0.08526	0.133333333333333	0.000104379402704469	0	0.000251905976086153	2.68699507088854e-10	0.547568312666277	0.324381020037972	0.0347583411005882	0	0.105296698004012	7.92663545912119e-08	1	1
Afp	AFP	chr4	74308089	A	C	MODERATE	0/0=288	0/1=12	1/1=0	rs35765619	PASS	0.0147	0.989,0.011	0.99420927,0.00579073	1,0	0.9841,0.0159	0.9992,0.0008	0.9891,0.0109	0.9939,0.0061	0.9942,0.005791	0.02	0.000113000603306546		0.578058233387166	2.05100004713188e-06	0.137290200558975	0.0115198310448006	0.0375162002977733	NA	1	0.000426608009803431	1	1
Sparcl1	SPARCL1	chr4	88412806	T	C	MODERATE	0/0=221	0/1=67	1/1=12	rs1130643	PASS	0.0826	0.856,0.144	0.780152,0.219848	0.8462,0.1538	0.8689,0.1311	0.4939,0.5061	0.8757,0.1243	0.9376,0.0624	0.7802,0.2198	0.151666666666667	0.000114474282097927	0.90850141728611	0.288579430468366	4.38575756474355e-49	0.119975289364029	5.40915623403748e-09	0.0378909873744138	1	1	1.92096181335767e-46	1	2.55312174246569e-06
Sdsl	SDSL	chr12	113867073	G	C	MODERATE	0/0=281	0/1=18	1/1=1	rs113152874	PASS	0.0118	0.976,0.024	0.9870208,0.0129792	1,0	0.9741,0.0259	0.9992,0.0008	0.9712,0.0288	0.9826,0.0174	0.987,0.01298	0.0333333333333333	0.000115128635462591		0.429492497655416	2.16670237307426e-10	0.609253355211905	0.0423525114418035	0.037992449702655	NA	1	6.47844009549204e-08	1	1
Fam185a	FAM185A	chr7	102389710	A	T	MODERATE	0/0=276	0/1=22	1/1=2	rs147397718	PASS	0.0108	0.942,0.058	0.9105431,0.0894569	0.8046,0.1954	0.9769,0.0231	0.9312,0.0688	0.9563,0.0437	0.8978,0.1022	0.9105,0.08946	0.0433333333333333	0.000123984557834527	1.41780620633524e-17	0.0406171661790307	0.0304521483953746	0.97221960461141	2.80600519803434e-05	0.0407909195275594	4.50862373614606e-15	1	1	1	0.0102419189728253
Oas1a	OAS1	chr12	113348870	G	A	MODERATE	0/0=60	0/1=146	1/1=94	rs1131454	PASS	0.0680	0.438,0.562	0.526158,0.473842	0.4087,0.5913	0.3732,0.6268	0.851,0.149	0.4254,0.5746	0.4202,0.5798	0.5262,0.4738	0.556666666666667	0.000124718171236715	0.173779768300896	0.0104027260882993	0	0.482782279368552	0.367413160289053	0.0409075601656425	1	1	0	1	1
Oas1g	OAS1	chr12	113348870	G	A	MODERATE	0/0=60	0/1=146	1/1=94	rs1131454	PASS	0.0680	0.438,0.562	0.526158,0.473842	0.4087,0.5913	0.3732,0.6268	0.851,0.149	0.4254,0.5746	0.4202,0.5798	0.5262,0.4738	0.556666666666667	0.000124718171236715	0.173779768300896	0.0104027260882993	0	0.482782279368552	0.367413160289053	0.0409075601656425	1	1	0	1	1
Cit	CIT	chr12	120313953	C	T	MODERATE	0/0=283	0/1=16	1/1=1	rs36054900	PASS	0.0183	0.977,0.023	0.9888179,0.0111821	1,0	0.9841,0.0159	0.9985,0.0015	0.9632,0.0368	0.9939,0.0061	0.9888,0.01118	0.03	0.000134961696410363		0.0876680906939236	1.14387350702572e-08	0.468603738106179	0.000164221885104343	0.0439975130297783	NA	1	3.04270352868842e-06	1	0.0540290001993288
Slc2a9	SLC2A9	chr4	10022981	C	T	MODERATE	0/0=88	0/1=131	1/1=81	rs2276961	PASS	0.0413	0.49,0.510	0.592652,0.407348	0.5823,0.4177	0.5605,0.4395	0.851,0.149	0.4722,0.5278	0.4008,0.5992	0.5927,0.4073	0.488333333333333	0.000142808596464317	0.00583327237371711	0.0789100649884207	0	0.125825863534344	1.67776397212421e-05	0.046412793850903	0.659159778230033	1	0	1	0.0062580596160233
Hps4	HPS4	chr22	26859942	C	T	MODERATE	0/0=10	0/1=65	1/1=225	rs5752330	PASS	0.0642	0.151991764,0.848	0.206869,0.793131	0.1974,0.8026	0.2752,0.7248	0.3306,0.6694	0.0895,0.9105	0.1217,0.8783	0.2069,0.7931	0.858333333333333	0.000160694462501443	0.00459004572719235	4.98210850352621e-09	0	0.00117306964491427	0.25115048590481	0.0520650058504675	0.532445304354313	2.57575009632305e-06	0	0.600611658196106	1
Nom1	NOM1	chr7	156761818	G	A	MODERATE	0/0=68	0/1=147	1/1=85	rs2302445	PASS	0.0323	0.496,0.504	0.552716,0.447284	0.7222,0.2778	0.4769,0.5231	0.5666,0.4334	0.4294,0.5706	0.5399,0.4601	0.5527,0.4473	0.528333333333333	0.000165340561167238	0	0.850874790404605	0.000109864062718401	0.0991987692828469	0.00847303019596879	0.0534050012570179	0	1	0.0156006969060129	1	1
Reln	RELN	chr7	103292201	G	A	MODERATE	0/0=288	0/1=12	1/1=0	rs78008536	PASS	0.0089	0.989,0.011	0.99400958,0.00599042	1,0	0.987,0.013	0.9992,0.0008	0.9831,0.0169	0.9969,0.0031	0.994,0.00599	0.02	0.00016901754445886		0.320571980561251	2.05100004713188e-06	0.651759407959309	0.000793380229362706	0.0544236493157529	NA	1	0.000426608009803431	1	0.230080266515185
Clip2	CLIP2	chr7	73814702	C	A	MODERATE	0/0=287	0/1=13	1/1=0	rs17145468	PASS	0.0307	0.971,0.029	0.9414936,0.0585064	0.9395,0.0605	0.9755,0.0245	0.9085,0.0915	0.9781,0.0219	0.9264,0.0736	0.9415,0.05851	0.0216666666666667	0.000173714534891981	0.000324692454563629	0.735569497557276	2.52964907064663e-08	0.975295144244333	9.13849422422006e-06	0.0557623657003259	0.0475051213890403	1	6.37471565802951e-06	1	0.00347262780520362
Bod1l	BOD1L1	chr4	13601337	G	A	MODERATE	0/0=209	0/1=86	1/1=5	rs3733557	PASS	0.0188	0.865,0.135	0.891374,0.108626	0.8254,0.1746	0.9092,0.0908	0.9871,0.0129	0.8648,0.1352	0.8446,0.1554	0.8914,0.1086	0.16	0.000184000840174336	0.450072506131382	0.000156158306964471	0	0.171443329291147	0.807435970076878	0.0588802688557875	1	0.066228412229047	0	1	1
Naaa	NAAA	chr4	76836137	A	G	MODERATE	0/0=35	0/1=126	1/1=139	rs6823734	PASS	0.0398	0.29,0.710	0.255591,0.744409	0.4613,0.5387	0.3026,0.6974	0.025,0.975	0.2873,0.7127	0.2894,0.7106	0.2556,0.7444	0.673333333333333	0.000186954349197316	1.11611152764368e-07	0.352166277546501	8.56922959984101e-80	0.0964626842958762	0.118065267614607	0.0596384373939438	2.46660647609253e-05	1	3.9075686975275e-77	1	1
Acacb	ACACB	chr12	109617728	A	G	MODERATE	0/0=278	0/1=22	1/1=0	rs16940029	PASS	0.0934	0.966,0.034	0.9211262,0.0788738	0.9821,0.0179	0.9597,0.0403	0.7625,0.2375	0.9761,0.0239	0.9888,0.0112	0.9211,0.07887	0.0366666666666667	0.000196128016372713	0.0195103725908374	0.735158751985273	6.44525566603088e-27	0.138034672556722	0.000593909005669913	0.0623687092065227	1	1	2.60388328907648e-24	1	0.175797065678294
Kmt2c	KMT2C	chr7	151877127	G	T	MODERATE	0/0=286	0/1=14	1/1=0	rs13231116	PASS	0.0080	0.981,0.019	0.99221246,0.00778754	1,0	0.9899,0.0101	0.9977,0.0023	0.9742,0.0258	0.9969,0.0031	0.9922,0.007788	0.0233333333333333	0.000199887443168345		0.0603357792878949	5.16004193840125e-06	0.758825697171215	0.000159329739788605	0.0633643194843654	NA	1	0.000995888094111441	1	0.0525788141302396
Rest	REST	chr4	57797414	C	T	MODERATE	0/0=200	0/1=85	1/1=15	rs3796529	PASS	0.0194	0.775,0.225	0.739217,0.260783	0.623,0.377	0.7752,0.2248	0.7262,0.2738	0.8151,0.1849	0.773,0.227	0.7392,0.2608	0.191666666666667	0.000234819546317405	6.8831500876956e-15	0.144100060772767	0.000112081473921706	0.736760479292364	0.0963988736483265	0.0742029766363	2.09247762665946e-12	1	0.0158034878229605	1	1
Shroom3	SHROOM3	chr4	77660731	C	G	MODERATE	0/0=86	0/1=118	1/1=96	rs344141	PASS	0.0530	0.46598353,0.534	0.561502,0.438498	0.7312,0.2688	0.5144,0.4856	0.5787,0.4213	0.3936,0.6064	0.5695,0.4305	0.5615,0.4385	0.516666666666667	0.000273244647105653	0	0.265028651590617	9.88427750838738e-05	0.000436774274682571	0.000861499309952274	0.085798819191175	0	1	0.0143322023871617	0.226685848560254	0.244665804026446
Nom1	NOM1	chr7	156743264	C	A	MODERATE	0/0=220	0/1=70	1/1=10	rs61747373	PASS	-0.0001	0.823,0.177	0.786941,0.213059	0.7232,0.2768	0.7594,0.2406	0.7557,0.2443	0.8489,0.1511	0.8507,0.1493	0.7869,0.2131	0.15	0.000309586027381169	4.97276351579449e-09	4.62334728226825e-05	3.09877450886274e-06	0.952466121429096	0.969808197894224	0.0969004265703059	1.20838153433806e-06	0.0205738954060937	0.00061045857824596	1	1
Ankle2	ANKLE2	chr12	133331459	G	C	MODERATE	0/0=268	0/1=30	1/1=2	rs7968520	PASS	0.0768	0.923,0.077	0.897364,0.102636	1,0	0.8141,0.1859	0.7519,0.2481	0.9513,0.0487	0.9918,0.0082	0.8974,0.1026	0.0566666666666667	0.000338949386706242		2.81969561691329e-12	2.60958219954426e-23	0.48537929161725	6.42598685374196e-09	0.105752208652348	NA	1.53109471998392e-09	1.03339455101953e-20	1	3.02021382125872e-06
Ddx54	DDX54	chr12	113596866	G	A	MODERATE	0/0=271	0/1=28	1/1=1	rs1048889	PASS	0.0149	0.953,0.047	0.9752396,0.0247604	1,0	0.9568,0.0432	0.9977,0.0023	0.9195,0.0805	0.9898,0.0102	0.9752,0.02476	0.05	0.000350226041685664		0.561791823137042	8.99280649946377e-14	0.0197381781179443	1.0379584252096e-06	0.108920298964242	NA	1	3.14748227481232e-11	1	0.000436980497013242
Htt	HTT	chr4	3189547	C	A	MODERATE	0/0=229	0/1=64	1/1=7	rs363125	PASS	0.0814	0.873,0.127	0.810903,0.189097	0.9911,0.0089	0.8775,0.1225	0.5166,0.4834	0.8917,0.1083	0.8926,0.1074	0.8109,0.1891	0.13	0.000400900494936254	0	0.685143847949253	7.51627029513259e-50	0.189609939130118	0.173515797862161	0.124279153430239	0	1	3.29964265956321e-47	1	1
Shroom3	SHROOM3	chr4	77660299	T	G	MODERATE	0/0=264	0/1=35	1/1=1	rs61999292	PASS	0.0368	0.937,0.063	0.966853,0.033147	0.999,0.001	0.9452,0.0548	0.9955,0.0045	0.9284,0.0716	0.9499,0.0501	0.9669,0.03315	0.0616666666666667	0.000408771466625213	9.54791801177635e-15	0.598159368160471	3.99680288865056e-15	0.443954577466698	0.325802551014798	0.126310383187191	2.87392332154468e-12	1	1.45083944858015e-12	1	1
Man2b2	MAN2B2	chr4	6600012	A	G	MODERATE	0/0=102	0/1=142	1/1=56	rs2301790	PASS	0.0193	0.517,0.483	0.500599,0.499401	0.3859,0.6141	0.4899,0.5101	0.5628,0.4372	0.5517,0.4483	0.4898,0.5102	0.5006,0.4994	0.423333333333333	0.000428162097640342	1.11263830598649e-13	0.00181705788851787	0.569663449747267	0.32939648738264	0.000797306435915573	0.131873926073225	3.21552470430096e-11	0.715920808076041	1	1	0.230080266515185
Tecpr1	TECPR1	chr7	97852399	G	A	MODERATE	0/0=213	0/1=79	1/1=6	rs11762014	PASS	0.0567	0.81,0.190	0.785743,0.214257	0.7391,0.2609	0.7104,0.2896	0.7632,0.2368	0.8111,0.1889	0.8916,0.1084	0.7857,0.2143	0.152684563758389	0.000460290405652628	4.41745389526547e-07	4.66450089869271e-09	2.90407757704518e-05	0.0654549365432849	0.0100144548866601	0.141309154535357	9.27665318005749e-05	2.41621146552282e-06	0.00490789110520635	1	1
Ap5z1	AP5Z1	chr7	4830463	G	A	MODERATE	0/0=284	0/1=15	1/1=1	rs11766611	PASS	0.0034	0.984,0.016	0.9888179,0.0111821	0.999,0.001	0.9769,0.0231	1,0	0.9612,0.0388	1,0	0.9888,0.01118	0.0283333333333333	0.000460789846270515	4.71758967002245e-07	0.551689320221976		0.268816647415609		0.141309154535357	9.8125865136467e-05	1	NA	1	NA
Uspl1	USPL1	chr13	31231806	T	C	MODERATE	0/0=113	0/1=132	1/1=55	rs7984952	PASS	0.0828	0.58,0.420	0.521366,0.478634	0.8204,0.1796	0.611,0.389	0.177,0.823	0.5984,0.4016	0.5358,0.4642	0.5214,0.4786	0.403333333333333	0.00047925102834362	0	0.599013932486628	3.83452107615513e-76	0.945364265681124	0.018080804401992	0.146171563644804	0	1	1.73019540960397e-73	1	1
Golga3	GOLGA3	chr12	133384516	T	C	MODERATE	0/0=286	0/1=14	1/1=0	rs118103768	PASS	0.0043	0.982,0.018	0.99161342,0.00838658	1,0	0.987,0.013	0.9977,0.0023	0.9712,0.0288	0.999,0.001	0.9916,0.008387	0.0233333333333333	0.000502003489507574		0.160843547516332	5.16004193840125e-06	0.511351594541462	8.9278863155684e-06	0.152609060810303	NA	1	0.000995888094111441	1	0.0034193804588627
Lyar	LYAR	chr4	4276475	C	A,T	MODERATE	0/0=269	0/1=8|0/2=22	1/1=1	rs2272739	PASS	0.0560	0.937,0.022,0.041	0.9255192,0.0473243,0.0271565	0.8492,0.1508,0	0.9525,0.0115,0.036	0.9818,0.0144,0.0038	0.9275,0.0089,0.0636	0.907,0.0501,0.0429	0.9255,0.04732,0.02716	0.0166666666666667,0.0366666666666667	0.000543334016998368,0.18339537578479	5.50251820161618e-18,9.27021348573476e-10	0.428496489908497,0.949024144448222	0.705806401690601,1.42068672381868e-08	0.163239220889187,0.0203633332661464	0.000677683926207474,0.542160850571546	0.164630207150505,1	1.77181086092041e-15,2.31755337143369e-07	1,1	1,3.69378548192857e-06	1,1	0.199239074304997,1
Ap5z1	AP5Z1	chr7	4827859	G	A	MODERATE	0/0=282	0/1=18	1/1=0	rs77890266	PASS	-0.0200	0.985,0.015	0.9876198,0.0123802	1,0	0.9813,0.0187	0.9985,0.0015	0.9761,0.0239	0.9765,0.0235	0.9876,0.01238	0.03	0.000582988864939793		0.184812755925318	1.14387350702572e-08	0.458902652132852	0.430649494710026	0.176062637211817	NA	1	3.04270352868842e-06	1	1
Scarb1	SCARB1	chr12	125348263	C	T	MODERATE	0/0=282	0/1=11	1/1=3	rs4238001	PASS	-0.0011	0.944,0.056	0.9357029,0.0642971	0.997,0.003	0.9006,0.0994	0.9334,0.0666	0.8837,0.1163	0.954,0.046	0.9357,0.0643	0.0287162162162162	0.00059701121913556	7.91658175192111e-06	4.23660015643626e-07	0.000769446399168924	1.05859872104511e-09	0.0883128351725166	0.179700376959804	0.00148831736936117	0.000209288047727951	0.0977196926944533	6.00225474832577e-07	1
Hpse	HPSE	chr4	84230619	T	C	MODERATE	0/0=21	0/1=105	1/1=174	rs11099592	PASS	0.0161	0.216,0.784	0.186701,0.813299	0.13,0.87	0.3213,0.6787	0.1233,0.8767	0.2505,0.7495	0.1697,0.8303	0.1867,0.8133	0.755	0.000626644834868363	3.68871942197456e-09	0.00245267386347536	1.79336910535044e-11	0.805096546461894	0.000270937400113879	0.187993450460509	9.03736258383767e-07	0.932016068120637	5.61324529974688e-09	1	0.0869709054365552
Daglb	DAGLB	chr7	6452461	G	A	MODERATE	0/0=288	0/1=12	1/1=0	rs1133850	PASS	0.0089	0.969,0.031	0.9484824,0.0515176	0.9137,0.0863	0.9827,0.0173	0.9682,0.0318	0.9881,0.0119	0.8926,0.1074	0.9485,0.05152	0.02	0.000654520614306495	8.81572981657921e-08	0.71963880415865	0.14701927388335	0.195311206456723	1.26151835703963e-10	0.195701663677642	1.9923549385469e-05	1	1	1	6.24451586734617e-08
Akap9	AKAP9	chr7	91712698	A	G	MODERATE	0/0=121	0/1=140	1/1=39	rs6960867	PASS	0.0245	0.641,0.359	0.704073,0.295927	0.8383,0.1617	0.6542,0.3458	0.7791,0.2209	0.6163,0.3837	0.59,0.41	0.7041,0.2959	0.363333333333333	0.000686858384336908	0	0.510705186235096	5.62276891713509e-11	0.415010985095172	0.0653117515736573	0.204683798532399	0	1	1.7149445197262e-08	1	1
Limch1	LIMCH1	chr4	41673604	T	C	MODERATE	0/0=63	0/1=139	1/1=98	rs11734372	PASS	0.0586	0.496,0.504	0.514776,0.485224	0.8591,0.1409	0.5187,0.4813	0.3116,0.6884	0.4344,0.5656	0.5143,0.4857	0.5148,0.4852	0.558333333333333	0.000711985956956651	0	0.00568633889986714	3.17005889081566e-08	0.776404832342056	0.00507427156066576	0.211459829216125	0	1	7.89344663813099e-06	1	1
Tmem120b	TMEM120B	chr12	122186317	G	A	MODERATE	0/0=84	0/1=133	1/1=83	rs28655666	PASS	0.0464	0.506,0.494	0.574081,0.425919	0.4821,0.5179	0.5519,0.4481	0.7897,0.2103	0.4533,0.5467	0.5174,0.4826	0.5741,0.4259	0.498333333333333	0.000718772823864011	0.447784042515651	0.0710453939548745	0	0.0603246540034324	0.543881646025871	0.212756755863747	1	1	0	1	1
Ap5z1	AP5Z1	chr7	4821300	C	G	MODERATE	0/0=282	0/1=18	1/1=0	rs11549839	PASS	0.0109	0.983,0.017	0.9874201,0.0125799	1,0	0.9813,0.0187	0.9985,0.0015	0.9751,0.0249	0.9765,0.0235	0.9874,0.01258	0.03	0.00072571830456325		0.184812755925318	1.14387350702572e-08	0.540435226361008	0.430649494710026	0.214086899846159	NA	1	3.04270352868842e-06	1	1
Slc15a4	SLC15A4	chr12	129299446	A	G	MODERATE	0/0=246	0/1=51	1/1=3	rs33990080	PASS	0.0298	0.916,0.084	0.9404952,0.0595048	1,0	0.9366,0.0634	0.9992,0.0008	0.8887,0.1113	0.8558,0.1442	0.9405,0.0595	0.095	0.000740458245090059		0.0345882920153089	0	0.303051709490379	0.0041839264747648	0.217694724056477	NA	1	0	1	1
Zbtb49	ZBTB49	chr4	4304522	A	C	MODERATE	0/0=162	0/1=119	1/1=19	rs2920217	PASS	0.0239	0.737,0.263	0.797324,0.202676	0.753,0.247	0.7104,0.2896	0.8964,0.1036	0.7306,0.2694	0.8395,0.1605	0.7973,0.2027	0.261666666666667	0.000783887105946457	0.512630592869181	0.262653985087486	0	0.734542339196045	1.02551479574942e-06	0.229678922042312	1	1	0	1	0.000432767243806255
Add1	ADD1	chr4	2916762	C	G	MODERATE	0/0=205	0/1=84	1/1=11	rs4963	PASS	0.0365	0.798,0.202	0.762181,0.237819	0.5476,0.4524	0.8228,0.1772	0.8298,0.1702	0.8091,0.1909	0.8006,0.1994	0.7622,0.2378	0.176666666666667	0.000787605910057018	3.44038361141213e-29	0.979999515149617	0.727889583711902	0.477847970760119	0.264519479234045	0.229980925736649	1.21445541482848e-26	1	1	1	1
Htt	HTT	chr4	3234980	G	A	MODERATE	0/0=169	0/1=100	1/1=31	rs362272	PASS	0.0496	0.720991739,0.279	0.789736,0.210264	0.6815,0.3185	0.7133,0.2867	0.9894,0.0106	0.6909,0.3091	0.7873,0.2127	0.7897,0.2103	0.27	0.000789527963439118	0.0401920953167626	0.504153992360585	0	0.0963135765755238	0.00910683669217982	0.229980925736649	1	1	0	1	1
Aasdh	AASDH	chr4	57221348	T	C	MODERATE	0/0=283	0/1=16	1/1=1	rs3796543	PASS	0.0631	0.958,0.042	0.9353035,0.0646965	0.8085,0.1915	0.9784,0.0216	0.9871,0.0129	0.9821,0.0179	0.9172,0.0828	0.9353,0.0647	0.03	0.000790300150037597	1.76196500311389e-20	0.339082348947406	0.00942961219373628	0.113083442362243	2.67763122255045e-05	0.229980925736649	5.92020241046267e-18	1	0.848665097436265	1	0.00980013027453465
Micall2	MICALL2	chr7	1479659	T	C	MODERATE	0/0=268	0/1=30	1/1=2	rs61287564	PASS	0.0779	0.919,0.081	0.9009585,0.0990415	0.9722,0.0278	0.7824,0.2176	0.8132,0.1868	0.9493,0.0507	0.9806,0.0194	0.901,0.09904	0.0566666666666667	0.000799362111958431	0.00364720863718171	1.62245292345552e-16	7.25907356510773e-14	0.605401727298871	6.61261304897298e-05	0.231015650355987	0.444959453736169	9.10196090058547e-14	2.55519389491792e-11	1	0.0226812627579773
Rita1	RITA1	chr12	113629471	C	A	MODERATE	0/0=271	0/1=28	1/1=1	rs34831139	PASS	0.0199	0.951,0.049	0.9740415,0.0259585	1,0	0.9568,0.0432	0.9932,0.0068	0.9195,0.0805	0.9898,0.0102	0.974,0.02596	0.05	0.000829740207290097		0.561791823137042	4.81041873001686e-10	0.0197381781179443	1.0379584252096e-06	0.238965179699548	NA	1	1.40945268789494e-07	1	0.000436980497013242
C530008M17Rik	KIAA1211	chr4	57176832	T	C	MODERATE	0/0=283	0/1=16	1/1=1	rs79868722	PASS	0.0661	0.957,0.043	0.9355032,0.0644968	0.8125,0.1875	0.9741,0.0259	0.9962,0.0038	0.9831,0.0169	0.9039,0.0961	0.9355,0.0645	0.03	0.000833494216418966	7.46831834126191e-20	0.654610308015632	9.96081500170831e-07	0.0819724477156638	6.89841190758974e-07	0.239212840112243	2.46454505261643e-17	1	0.000214157522536729	1	0.000293182506072564
Ddx55	DDX55	chr12	124104551	A	G	MODERATE	0/0=265	0/1=35	1/1=0	rs10773019	PASS	0.0313	0.932,0.068	0.899161,0.100839	0.9117,0.0883	0.9568,0.0432	0.8502,0.1498	0.9563,0.0437	0.8528,0.1472	0.8992,0.1008	0.0583333333333333	0.000851887880795285	0.0293719202995494	0.213852954702226	1.25130374669675e-08	0.189497401659996	6.50473021198959e-08	0.243639933907452	1	1	3.27841581634548e-06	1	2.95314751624327e-05
Slc46a3	SLC46A3	chr13	29287552	C	T	MODERATE	0/0=282	0/1=17	1/1=1	rs141294918	PASS	0.0184	0.972,0.028	0.986222,0.013778	1,0	0.9841,0.0159	0.9992,0.0008	0.9682,0.0318	0.9744,0.0256	0.9862,0.01378	0.0316666666666667	0.000862876302899718		0.0603289570465819	6.80789202789356e-10	0.98823754274497	0.47752671476508	0.24591974632642	NA	1	1.97428868808913e-07	1	1
Iqce	IQCE	chr7	2646796	G	A	MODERATE	0/0=219	0/1=74	1/1=7	rs61729413	PASS	0.0129	0.875,0.125	0.897764,0.102236	0.9474,0.0526	0.8458,0.1542	0.913,0.087	0.829,0.171	0.9335,0.0665	0.8978,0.1022	0.146666666666667	0.000877026538200987	1.12164277865645e-10	0.705632150833154	8.02437872351458e-05	0.200325111257499	1.75221798848213e-07	0.24907553684908	2.91627122450677e-08	1	0.0119563242980367	1	7.65719260966691e-05
Ankle2	ANKLE2	chr12	133306808	C	T	MODERATE	0/0=290	0/1=10	1/1=0	rs149597645	PASS	0.0111	0.984,0.016	0.99480831,0.00519169	1,0	0.9942,0.0058	1,0	0.9801,0.0199	0.998,0.002	0.9948,0.005192	0.0166666666666667	0.000881390961070538		0.0597513345498213		0.643486281850328	0.00110772606795062	0.249433641982962	NA	1	NA	1	0.307947846890272
Uspl1	USPL1	chr13	31233063	G	A	MODERATE	0/0=113	0/1=132	1/1=55	rs3742302	PASS	0.0804	0.582,0.418	0.525359,0.474641	0.8214,0.1786	0.6124,0.3876	0.1823,0.8177	0.5994,0.4006	0.546,0.454	0.5254,0.4746	0.403333333333333	0.000938325440940998	0	0.563690861116096	8.23667241063916e-74	0.913921829272954	0.0487296388053647	0.264607774345361	0	1	3.69826591237698e-71	1	1
Zfp518b	ZNF518B	chr4	10447907	C	T	MODERATE	0/0=288	0/1=12	1/1=0	rs72648876	PASS	0.0112	0.985,0.015	0.99301118,0.00698882	1,0	0.9841,0.0159	0.9992,0.0008	0.9801,0.0199	0.9969,0.0031	0.993,0.006989	0.02	0.000954115521379251		0.578058233387166	2.05100004713188e-06	0.988934596811671	0.000793380229362706	0.26810646150757	NA	1	0.000426608009803431	1	0.230080266515185
Micall2	MICALL2	chr7	1478610	C	T	MODERATE	0/0=268	0/1=24	1/1=5	rs4580937	VQSRTrancheINDEL99.00to99.50	0.0918	0.918983418,0.081	0.9009585,0.0990415	0.9722,0.0278	0.7824,0.2176	0.8132,0.1868	0.9493,0.0507	0.9806,0.0194	0.901,0.09904	0.0572390572390572	0.000997157465913025	0.00317598325118551	2.84354579025307e-16	1.2178370054597e-13	0.573140816171692	5.5527744127204e-05	0.279204090455647	0.393821923147003	1.59238564254172e-13	4.22589440894516e-11	1	0.0192125994680126
Gbp4	GBP6	chr1	89847444	A	G	MODERATE	0/0=21	0/1=108	1/1=171	rs4658146	PASS	0.0144	0.22295882,0.777	0.19349,0.80651	0.2748,0.7252	0.1571,0.8429	0.09,0.91	0.2515,0.7485	0.2157,0.7843	0.1935,0.8065	0.75	0.00106408088866685	0.276115905381271	3.11536792586765e-05	7.32867456167148e-21	0.94652329919513	0.115313010385289	0.296878567938051	1	0.0141126167041805	2.86551175361355e-18	1	1
Gbp8	GBP6	chr1	89847444	A	G	MODERATE	0/0=21	0/1=108	1/1=171	rs4658146	PASS	0.0144	0.22295882,0.777	0.19349,0.80651	0.2748,0.7252	0.1571,0.8429	0.09,0.91	0.2515,0.7485	0.2157,0.7843	0.1935,0.8065	0.75	0.00106408088866685	0.276115905381271	3.11536792586765e-05	7.32867456167148e-21	0.94652329919513	0.115313010385289	0.296878567938051	1	0.0141126167041805	2.86551175361355e-18	1	1
Mlxip	MLXIP	chr12	122622795	A	G	MODERATE	0/0=286	0/1=14	1/1=0	rs74580294	PASS	0.0122	0.976,0.024	0.99101438,0.00898562	1,0	0.9914,0.0086	1,0	0.9652,0.0348	0.9959,0.0041	0.991,0.008986	0.0233333333333333	0.0011336192917859		0.0320182539804146		0.196210920002693	0.000479945325031927	0.314012543824694	NA	1	NA	1	0.14686326945977
Hps4	HPS4	chr22	26853905	C	A	MODERATE	0/0=17	0/1=38	1/1=244	rs1894704	PASS	0.0820	0.119,0.881	0.172724,0.827276	0.1954,0.8046	0.2406,0.7594	0.2557,0.7443	0.0616,0.9384	0.1033,0.8967	0.1727,0.8273	0.879598662207358	0.00118992628366099	9.97294809550464e-05	2.88361095002188e-08	2.09707806675397e-11	3.85546816586214e-05	0.291987847865794	0.328419654290433	0.0164553643575827	1.47064158451116e-05	6.52191278760485e-09	0.0207809734139969	1
Trmt44	TRMT44	chr4	8465721	A	G	MODERATE	0/0=290	0/1=10	1/1=0	rs79184768	PASS	-0.0014	0.990775,9.225e-03	0.99460863,0.00539137	0.999,0.001	0.9971,0.0029	0.9985,0.0015	0.9821,0.0179	0.9959,0.0041	0.9946,0.005391	0.0166666666666667	0.00126487473077286	0.000228836436801938	0.0100216588999229	9.06577688506438e-05	0.855066280253932	0.00978419278015852	0.347840550962537	0.0347831383938946	1	0.0134173497898953	1	1
Aasdh	AASDH	chr4	57248716	G	C	MODERATE	0/0=282	0/1=17	1/1=1	rs34228795	PASS	0.0633	0.957991764,0.042	0.9353035,0.0646965	0.8095,0.1905	0.9769,0.0231	0.9871,0.0129	0.9821,0.0179	0.9172,0.0828	0.9353,0.0647	0.0316666666666667	0.0014197943456138	7.31794383077104e-20	0.343696344150962	0.00495328433563746	0.0752763677650043	5.17216132993019e-05	0.389023650698181	2.42955735181599e-17	1	0.505235002235021	1	0.0179991214281571
Aasdh	AASDH	chr4	57250285	T	C	MODERATE	0/0=282	0/1=17	1/1=1	rs34543011	PASS	0.0645	0.957991764,0.042	0.9353035,0.0646965	0.8095,0.1905	0.9769,0.0231	0.9871,0.0129	0.9821,0.0179	0.9172,0.0828	0.9353,0.0647	0.0316666666666667	0.0014197943456138	7.31794383077104e-20	0.343696344150962	0.00495328433563746	0.0752763677650043	5.17216132993019e-05	0.389023650698181	2.42955735181599e-17	1	0.505235002235021	1	0.0179991214281571
Kmt2c	KMT2C	chr7	151859683	G	A	MODERATE	0/0=284	0/1=16	1/1=0	rs74483926	PASS	0.0400	0.952,0.048	0.9420927,0.0579073	0.8522,0.1478	0.9784,0.0216	0.997,0.003	0.9592,0.0408	0.9172,0.0828	0.9421,0.05791	0.0266666666666667	0.0014533543402117	9.77992379292506e-15	0.552199657589051	2.11745092371096e-06	0.138779756610409	6.57068555682665e-06	0.395312380537582	2.93397713787752e-12	1	0.000429842537513325	1	0.00257570873827605
Ube3b	UBE3B	chr12	109936056	T	C	MODERATE	0/0=284	0/1=16	1/1=0	rs61748069	PASS	0.0135	0.975,0.025	0.9888179,0.0111821	0.999,0.001	0.9942,0.0058	0.9985,0.0015	0.9622,0.0378	0.9888,0.0112	0.9888,0.01118	0.0266666666666667	0.00145352072684202	1.13972094251125e-06	0.00242503893811952	1.09384719726435e-07	0.231272482804145	0.0213443880512865	0.395312380537582	0.000230223630387273	0.926364874361657	2.55960244159858e-05	1	1
Dhx37	DHX37	chr12	125434580	C	T	MODERATE	0/0=59	0/1=129	1/1=108	rs4447263	PASS	0.0509	0.367,0.633	0.351637,0.648363	0.1548,0.8452	0.3357,0.6643	0.5885,0.4115	0.3996,0.6004	0.1963,0.8037	0.3516,0.6484	0.58277027027027	0.001649710624748	1.71394153685013e-31	0.00258713025382969	3.80850906367414e-12	0.488304093608089	3.28798945776137e-21	0.44542186868196	6.17018953266047e-29	0.977935235947623	1.23014842756675e-09	1	1.79524224393771e-18
Cenpc1	CENPC	chr4	68380215	G	A	MODERATE	0/0=42	0/1=133	1/1=125	rs11250	PASS	0.0344	0.346,0.654	0.299321,0.700679	0.1726,0.8274	0.2464,0.7536	0.3805,0.6195	0.3748,0.6252	0.2802,0.7198	0.2993,0.7007	0.638333333333333	0.0017382775127877	1.25818867191319e-17	6.39783732640271e-06	0.429265211288057	0.59792311014587	0.00069071544446935	0.467596650939891	4.01362186340308e-15	0.00302617705538848	1	1	0.20237962522952
Btbd8	BTBD8	chr1	92568089	A	G	MODERATE	0/0=290	0/1=10	1/1=0	rs17131602	PASS	0.0070	0.987,0.013	0.99440895,0.00559105	1,0	0.9914,0.0086	0.9985,0.0015	0.9811,0.0189	0.999,0.001	0.9944,0.005591	0.0166666666666667	0.00177759792140098		0.18994708925724	9.06577688506438e-05	0.745122015974072	0.000278237227716138	0.476396242935463	NA	1	0.0134173497898953	1	0.0890359128691642
Zfp12	ZNF12	chr7	6732315	A	C	MODERATE	0/0=280	0/1=20	1/1=0	rs61227179	PASS	0.0421	0.946,0.054	0.9341054,0.0658946	0.999,0.001	0.9669,0.0331	0.8116,0.1884	0.9652,0.0348	0.9775,0.0225	0.9341,0.06589	0.0333333333333333	0.00183450652605423	3.34598460050017e-08	0.98136297974577	1.09742829061505e-19	0.875768448158299	0.194348373453568	0.489813242456479	7.76268427316039e-06	1	4.25802176758639e-17	1	1
N4bp2	N4BP2	chr4	40154465	G	A	MODERATE	0/0=282	0/1=18	1/1=0	rs113404449	PASS	0.0139	0.976,0.024	0.9864217,0.0135783	0.999,0.001	0.9697,0.0303	1,0	0.9692,0.0308	0.9847,0.0153	0.9864,0.01358	0.03	0.00197895850520058	1.95288812454564e-07	0.974898139605191		0.928135918832627	0.047465527178383	0.526402962383354	4.19870946777313e-05	1	NA	1	1
Serpine1	SERPINE1	chr7	100771723	G	A	MODERATE	0/0=289	0/1=11	1/1=0	rs6090	PASS	0.0188	0.973,0.027	0.9548722,0.0451278	0.9474,0.0526	0.9755,0.0245	0.916,0.084	0.9821,0.0179	0.9724,0.0276	0.9549,0.04513	0.0183333333333333	0.00205015063194976	0.000676552901803296	0.447107333707638	4.49080463007404e-08	0.949701809120478	0.24371049805425	0.543289917466686	0.096070512056068	1	1.10024713436814e-05	1	1
Clip1	CLIP1	chr12	122825398	C	T	MODERATE	0/0=289	0/1=11	1/1=0	rs61954403	PASS	0.0044	0.989991763,0.010	0.99341054,0.00658946	1,0	0.9856,0.0144	0.9985,0.0015	0.9801,0.0199	0.999,0.001	0.9934,0.006589	0.0183333333333333	0.00206250264130858		0.576501844706901	2.98121208182067e-05	0.825338949006165	0.000117568195096673	0.544500697305465	NA	1	0.00500843629745872	1	0.0398556181377721
Ap5z1	AP5Z1	chr7	4821352	G	C	MODERATE	0/0=283	0/1=17	1/1=0	rs11549840	PASS	0.0126	0.983,0.017	0.9874201,0.0125799	1,0	0.9813,0.0187	0.9985,0.0015	0.9751,0.0249	0.9765,0.0235	0.9874,0.01258	0.0283333333333333	0.0021044007455393		0.250663083253105	3.54019582538001e-08	0.676793651018885	0.553115035498379	0.553457396076836	NA	1	8.74428368868863e-06	1	1
Tbc1d14	TBC1D14	chr4	6925237	C	G	MODERATE	0/0=245	0/1=46	1/1=9	rs34860182	PASS	0.0248	0.888,0.112	0.9283147,0.0716853	0.9732,0.0268	0.8948,0.1052	0.9879,0.0121	0.8956,0.1044	0.8589,0.1411	0.9283,0.07169	0.106666666666667	0.00216780197912225	2.04194439135108e-11	0.93185629717573	0	0.886134739957321	0.046872370239563	0.567964118530029	5.45199152490738e-09	1	0	1	1
Gsap	GSAP	chr7	76991935	C	T	MODERATE	0/0=174	0/1=107	1/1=19	rs1527263	PASS	0.0458	0.738,0.262	0.698083,0.301917	0.9117,0.0883	0.781,0.219	0.4546,0.5454	0.7674,0.2326	0.6769,0.3231	0.6981,0.3019	0.241666666666667	0.00223769057064573	0	0.333582918660243	2.56977473096504e-35	0.67890583546589	0.000553908691830832	0.584037238938536	0	1	1.06388673861953e-32	1	0.165618698857419
Pilra	PILRB	chr7	99956436	T	C	MODERATE	0/0=285	0/1=4	1/1=11	rs11771799	PASS	0.2715	0.99785001,2.066e-03	0.9221246,0.0778754	0.9772,0.0228	0.9236,0.0764	0.9297,0.0703	0.8598,0.1402	0.9182,0.0818	0.9221,0.07788	0.0433333333333333	0.00228059819391521	0.0204930394693905	0.0132428985790852	0.0229843795176893	7.6721085877865e-10	0.00304360538921156	0.592955530417955	1	1	1	4.37310189503831e-07	0.782206585027371
Cit	CIT	chr12	120263003	G	C	MODERATE	0/0=289	0/1=9	1/1=2	rs55707601	PASS	0.0104	0.986,0.014	0.99141374,0.00858626	0.9911,0.0089	0.9885,0.0115	0.9962,0.0038	0.9861,0.0139	0.9928,0.0072	0.9914,0.008586	0.0216666666666667	0.00232533711172866	0.0329436039577691	0.148735837221033	0.000166000644471032	0.241399942892003	0.0127283023371476	0.602262311937723	1	1	0.0225760876480604	1	1
Zfp518b	ZNF518B	chr4	10447194	T	G	MODERATE	0/0=289	0/1=11	1/1=0	rs73224493	PASS	0.0048	0.984,0.016	0.99321086,0.00678914	1,0	0.9914,0.0086	1,0	0.9871,0.0129	0.9847,0.0153	0.9932,0.006789	0.0183333333333333	0.00274335015267169		0.124823379791512		0.385080700628999	0.645646132333691	0.707784339389296	NA	1	NA	1	1
Zbtb49	ZBTB49	chr4	4322624	C	G	MODERATE	0/0=290	0/1=9	1/1=1	rs34623124	PASS	0.0045	0.983,0.017	0.99321086,0.00678914	1,0	0.9827,0.0173	0.9992,0.0008	0.9851,0.0149	0.9939,0.0061	0.9932,0.006789	0.0183333333333333	0.00274335015267169		0.888445651055609	6.44622802159489e-06	0.597835652181703	0.0221700709311321	0.707784339389296	NA	1	0.00122478332410303	1	1
Sorcs2	SORCS2	chr4	7666160	G	A	MODERATE	0/0=277	0/1=23	1/1=0	rs34058821	PASS	0.0112	0.96,0.040	0.9804313,0.0195687	1,0	0.964,0.036	0.9985,0.0015	0.9553,0.0447	0.9734,0.0266	0.9804,0.01957	0.0383333333333333	0.00279478144835843		0.824696974018405	3.94333454778462e-11	0.539817089356257	0.192154644983617	0.715464050779758	NA	1	1.20666037162209e-08	1	1
Ssh1	SSH1	chr12	109221123	G	A	MODERATE	0/0=287	0/1=13	1/1=0	rs117096112	PASS	-0.0041	0.987,0.013	0.99121406,0.00878594	1,0	0.9899,0.0101	0.9977,0.0023	0.9761,0.0239	0.9898,0.0102	0.9912,0.008786	0.0216666666666667	0.00295337172304189		0.092640513863844	1.52740897565451e-05	0.773017800397855	0.0648909659121673	0.753109789375682	NA	1	0.00277988433569121	1	1
Lyar	LYAR	chr4	4276198	C	T	MODERATE	0/0=287	0/1=13	1/1=0	rs41264703	PASS	0.0019	0.98697529,0.013	0.99121406,0.00878594	1,0	0.9741,0.0259	0.9992,0.0008	0.9781,0.0219	0.9969,0.0031	0.9912,0.008786	0.0216666666666667	0.00295337172304189		0.619318411567771	6.52869406314593e-07	0.975295144244333	0.000356566513402878	0.753109789375682	NA	1	0.000144284138795525	1	0.111200685627322
Gbp4	GBP6	chr1	89847372	G	T	MODERATE	0/0=18	0/1=111	1/1=171	rs4658359	PASS	0.0150	0.223,0.777	0.194089,0.805911	0.2738,0.7262	0.1585,0.8415	0.0908,0.9092	0.2535,0.7465	0.2157,0.7843	0.1941,0.8059	0.755	0.00319090359440118	0.20459366223392	0.000100489800875208	1.34401218420591e-19	0.703653729780533	0.177284835605047	0.807298609383499	1	0.0434115939780899	5.20132715287687e-17	1	1
Gbp4	GBP6	chr1	89847411	C	T	MODERATE	0/0=18	0/1=111	1/1=171	rs4658360	PASS	0.0145	0.223,0.777	0.194089,0.805911	0.2738,0.7262	0.1585,0.8415	0.0908,0.9092	0.2535,0.7465	0.2157,0.7843	0.1941,0.8059	0.755	0.00319090359440118	0.20459366223392	0.000100489800875208	1.34401218420591e-19	0.703653729780533	0.177284835605047	0.807298609383499	1	0.0434115939780899	5.20132715287687e-17	1	1
Gbp8	GBP6	chr1	89847372	G	T	MODERATE	0/0=18	0/1=111	1/1=171	rs4658359	PASS	0.0150	0.223,0.777	0.194089,0.805911	0.2738,0.7262	0.1585,0.8415	0.0908,0.9092	0.2535,0.7465	0.2157,0.7843	0.1941,0.8059	0.755	0.00319090359440118	0.20459366223392	0.000100489800875208	1.34401218420591e-19	0.703653729780533	0.177284835605047	0.807298609383499	1	0.0434115939780899	5.20132715287687e-17	1	1
Gbp8	GBP6	chr1	89847411	C	T	MODERATE	0/0=18	0/1=111	1/1=171	rs4658360	PASS	0.0145	0.223,0.777	0.194089,0.805911	0.2738,0.7262	0.1585,0.8415	0.0908,0.9092	0.2535,0.7465	0.2157,0.7843	0.1941,0.8059	0.755	0.00319090359440118	0.20459366223392	0.000100489800875208	1.34401218420591e-19	0.703653729780533	0.177284835605047	0.807298609383499	1	0.0434115939780899	5.20132715287687e-17	1	1
Ankle2	ANKLE2	chr12	133306710	C	T	MODERATE	0/0=253	0/1=45	1/1=2	rs78905764	PASS	0.0164	0.935,0.065	0.9472843,0.0527157	0.8998,0.1002	0.9553,0.0447	0.9985,0.0015	0.9215,0.0785	0.9479,0.0521	0.9473,0.05272	0.0816666666666667	0.00350887796928268	0.216503514320474	0.00590324875924297	0	0.820656638651986	0.0192444307006066	0.873710614351387	1	1	0	1	1
Wbscr27	WBSCR27	chr7	73254812	T	C	MODERATE	0/0=50	0/1=114	1/1=136	rs13241921	PASS	0.0614	0.347,0.653	0.41873,0.58127	0.4187,0.5813	0.3876,0.6124	0.5363,0.4637	0.2744,0.7256	0.4305,0.5695	0.4187,0.5813	0.643333333333333	0.0035150958384178	0.0138780554255848	0.251269384639125	2.78888023785839e-13	0.000532968651839946	0.00369148961089127	0.873710614351387	1	1	9.48219280871853e-11	0.275011824349412	0.919180913111926
Gak	GAK	chr4	843508	C	T	MODERATE	0/0=234	0/1=60	1/1=6	rs1134921	PASS	0.0327	0.879,0.121	0.9157348,0.0842652	0.8681,0.1319	0.8285,0.1715	0.9947,0.0053	0.8777,0.1223	0.9591,0.0409	0.9157,0.08427	0.12	0.00351723200954979	0.488912772517309	0.00920387177156936	0	0.891418738638912	2.84731260791204e-09	0.873710614351387	1	1	0	1	1.36101542658196e-06
Stx18	STX18	chr4	4440183	T	G	MODERATE	0/0=262	0/1=38	1/1=0	rs61740788	PASS	0.0149	0.9568517,0.043	0.9616613,0.0383387	0.999,0.001	0.9683,0.0317	0.9289,0.0711	0.9543,0.0457	0.9703,0.0297	0.9617,0.03834	0.0633333333333333	0.0035305349410728	3.99680288865056e-15	0.00696364632941537	0.532709222458685	0.124619372492317	0.00130197224406015	0.873710614351387	1.22701848681572e-12	1	1	1	0.354136450384361
Man2b2	MAN2B2	chr4	6596360	G	A	MODERATE	0/0=75	0/1=138	1/1=86	rs2301795	PASS	0.0146	0.506,0.494	0.544529,0.455471	0.6121,0.3879	0.5245,0.4755	0.5613,0.4387	0.4612,0.5388	0.5521,0.4479	0.5445,0.4555	0.518394648829431	0.00353344102538533	3.44049503109289e-07	0.124139895382343	0.001183191013995	0.428421231614682	0.00653832305278068	0.873710614351387	7.259444515606e-05	1	0.1419829216794	1	1
Sh3tc1	SH3TC1	chr4	8220029	G	A	MODERATE	0/0=289	0/1=11	1/1=0	rs1281138	PASS	0.0138	0.983,0.017	0.99301118,0.00698882	0.999,0.001	0.9841,0.0159	1,0	0.9771,0.0229	1,0	0.993,0.006989	0.0183333333333333	0.00359802852157487	9.4368176855264e-05	0.735821948082132		0.53876763908572		0.877918959264268	0.0158538537116844	1	NA	1	NA
Pilra	PILRB	chr7	99956439	T	C	MODERATE	0/0=284	0/1=5	1/1=11	rs35986051	PASS	0.2293	0.99756167,2.287e-03	0.9221246,0.0778754	0.9772,0.0228	0.9236,0.0764	0.9297,0.0703	0.8598,0.1402	0.9182,0.0818	0.9221,0.07788	0.045	0.00372437489345708	0.0131055551248316	0.0193597417412938	0.033599380832934	1.64158220183812e-09	0.00476378410238247	0.90502309911007	1	1	1	9.29135526240376e-07	1
Hps4	HPS4	chr22	26862212	T	C	MODERATE	0/0=17	0/1=60	1/1=223	rs713998	PASS	0.0642	0.151,0.849	0.206869,0.793131	0.1974,0.8026	0.2752,0.7248	0.3306,0.6694	0.0895,0.9105	0.1217,0.8783	0.2069,0.7931	0.843333333333333	0.0037670220521353	0.0407060862202655	2.88223343414273e-07	2.66453525910038e-15	4.3522158818476e-05	0.0484696201444286	0.911619336616743	1	0.000144111671707136	9.69890834312538e-13	0.0233713992855216	1
Htt	HTT	chr4	3148570	G	A	MODERATE	0/0=275	0/1=24	1/1=1	rs35892913	PASS	0.0211	0.957,0.043	0.9764377,0.0235623	1,0	0.9741,0.0259	0.997,0.003	0.9264,0.0736	0.9775,0.0225	0.9764,0.02356	0.0433333333333333	0.00381127234290624		0.0843461446469167	3.74491548882361e-11	0.0151901860342532	0.019324606811657	0.918516634640404	NA	1	1.15343397055767e-08	1	1
Plb1	PLB1	chr2	28761981	G	A,C	MODERATE	0/0=165	0/1=1|0/2=110	1/1=0|2/2=24	rs6753929	PASS	0.0209	0.7485223,4.777e-04,0.251	0.800519,0,0.199481	0.7768,0,0.2232	0.696,0,0.304	0.9077,0,0.0923	0.7575,0,0.2425	0.7986,0,0.2014	0.8005,.,0.1995	0.00166666666666667,0.263333333333333	0.00386079109628068,0.000259676276824328	0.194785597865263,0.0676657582923137	0.281971895233966,0.106139242403358	0.137610262760338,0	0.195228842171266,0.351136713690855	0.201560145623984,0.00423263383044525	0.926589863107363,0.0817980271996633	1,1	1,1	1,0	1,1	1,1
Stard13	STARD13	chr13	33703666	C	T,G	MODERATE	0/0=288	0/1=1|0/2=11	1/1=0	rs34425674	PASS	0.0064	0.98094235,5.765e-05,0.019	0.9898163,0,0.0101837	1,0,0	0.9928,0,0.0072	1,0,0	0.9732,0,0.0268	0.9806,0,0.0194	0.9898,.,0.01018	0.00166666666666667,0.0183333333333333	0.00386079109628068,0.0712133016795158		0.281971895233966,0.0706928634262081		0.195228842171266,0.279931832731115	0.201560145623984,0.880223806802655	0.926589863107363,1	NA,NA	1,1	NA,NA	1,1	1,1
Zcchc4	ZCCHC4	chr4	25315754	G	T,C	MODERATE	0/0=281	0/1=1|0/2=18	1/1=0	rs144236014	PASS	0.0030	0.98494204,5.796e-05,0.015	0.99341054,0,0.00658946	1,0,0	0.9899,0,0.0101	1,0,0	0.9851,0,0.0149	0.9888,0,0.0112	0.9934,.,0.006589	0.00166666666666667,0.03	0.00386079109628068,1.1401260602284e-08		0.281971895233966,0.00951556227355765		0.195228842171266,0.0390350188541664	0.201560145623984,0.00690688980184828	0.926589863107363,5.18757357403922e-06	NA,NA	1,1	NA,NA	1,1	1,1
Ddx55	DDX55	chr12	124097766	A	G	MODERATE	0/0=238	0/1=59	1/1=3	rs11057306	PASS	0.0580	0.881,0.119	0.847843,0.152157	0.9702,0.0298	0.902,0.098	0.6354,0.3646	0.8847,0.1153	0.9325,0.0675	0.8478,0.1522	0.108333333333333	0.00422394591028431	1.05665254324094e-10	0.541606980941594	8.52873915329154e-31	0.669303115984886	0.00432021064651122	1	2.75786313785885e-08	1	3.47972557454295e-28	1	1
Htt	HTT	chr4	3137674	G	A	MODERATE	0/0=275	0/1=24	1/1=1	rs363075	PASS	0.0210	0.957,0.043	0.976238,0.023762	1,0	0.9741,0.0259	0.997,0.003	0.9264,0.0736	0.9765,0.0235	0.9762,0.02376	0.0433333333333333	0.0043102479612469		0.0843461446469167	3.74491548882361e-11	0.0151901860342532	0.0274338551944151	1	NA	1	1.15343397055767e-08	1	1
Lrpap1	LRPAP1	chr4	3516559	C	T	MODERATE	0/0=290	0/1=10	1/1=0	rs1800493	PASS	0.0174	0.987,0.013	0.9938099,0.0061901	1,0	0.9914,0.0086	1,0	0.9881,0.0119	0.9867,0.0133	0.9938,0.00619	0.0166666666666667	0.00441873239047341		0.18994708925724		0.426310345220842	0.588075117944948	1	NA	1	NA	1	1
Aasdh	AASDH	chr4	57215803	G	A	MODERATE	0/0=289	0/1=11	1/1=0	rs150162083	PASS	0.0108	0.986,0.014	0.9928115,0.0071885	1,0	0.9971,0.0029	0.9977,0.0023	0.9861,0.0139	0.9826,0.0174	0.9928,0.007188	0.0183333333333333	0.00465731164932026		0.0055239917736134	0.000130851449933633	0.487357135122726	0.89159313724047	1	NA	1	0.018188351540775	1	1
Prr14l	PRR14L	chr22	32108475	C	T	MODERATE	0/0=274	0/1=26	1/1=0	rs16989427	PASS	-0.0419	0.977,0.023	0.9760383,0.0239617	0.9901,0.0099	0.987,0.013	0.9652,0.0348	0.9632,0.0368	0.9816,0.0184	0.976,0.02396	0.0433333333333333	0.0048632712115384	1.16502751408287e-05	0.000798748570967289	0.361300439854691	0.514195228695896	0.0034942738137318	1	0.00212035007563082	0.325090668383687	1	1	0.87356845343295
2210016L21Rik	C12orf43	chr12	121454148	C	T	MODERATE	0/0=267	0/1=32	1/1=1	rs16950706	PASS	0.0313	0.952,0.048	0.9660543,0.0339457	0.995,0.005	0.951,0.049	0.9955,0.0045	0.9394,0.0606	0.9346,0.0654	0.9661,0.03395	0.0566666666666667	0.0049681638340151	7.50195461307612e-11	0.537678630357674	1.0991207943789e-13	0.746475728512297	0.485217832591041	1	1.97301406323902e-08	1	3.82494036443857e-11	1	1
Parm1	PARM1	chr4	75937971	C	T	MODERATE	0/0=121	0/1=124	1/1=55	rs3822109	PASS	0.0366	0.612,0.388	0.667332,0.332668	0.8383,0.1617	0.7233,0.2767	0.7095,0.2905	0.5388,0.4612	0.5266,0.4734	0.6673,0.3327	0.39	0.00504889446538792	0	1.52573900431552e-05	1.50719720746206e-05	0.00535977282879671	0.00120105623585079	1	0	0.00707942898002401	0.00275817088965557	1	0.327888352387266
Zdhhc4	ZDHHC4	chr7	6621277	G	A	MODERATE	0/0=165	0/1=108	1/1=27	rs11559146	PASS	0.0263	0.687,0.313	0.673922,0.326078	0.7649,0.2351	0.6268,0.3732	0.5582,0.4418	0.7187,0.2813	0.7239,0.2761	0.6739,0.3261	0.27	0.00539380418087331	0.117103941607395	7.76870150810829e-05	7.97242513787881e-13	0.624503159591919	0.791928729215882	1	1	0.0341045996205954	2.66278999605152e-10	1	1
2410131K14Rik	C12orf49	chr12	117160976	T	C	MODERATE	0/0=275	0/1=24	1/1=1	rs10507274	PASS	0.0212	0.955,0.045	0.9758387,0.0241613	0.999,0.001	0.951,0.049	0.9977,0.0023	0.9254,0.0746	0.9918,0.0082	0.9758,0.02416	0.0433333333333333	0.00547449541278988	1.67175828735822e-10	0.628819921387262	8.2975848414435e-12	0.0125480533534218	3.08927239367485e-06	1	4.27970121563704e-08	1	2.63033439473759e-09	1	0.00124188750225729
Atp6v0a2	ATP6V0A2	chr12	124241506	C	T	MODERATE	0/0=282	0/1=18	1/1=0	rs17883456	PASS	0.0195	0.972,0.028	0.9852236,0.0147764	1,0	0.9813,0.0187	0.9977,0.0023	0.9602,0.0398	0.9816,0.0184	0.9852,0.01478	0.03	0.00553541086992637		0.184812755925318	6.3751699030945e-08	0.308693065708232	0.134061951046602	1	NA	1	1.54279111654887e-05	1	1
Abcb9	ABCB9	chr12	123444507	G	T	MODERATE	0/0=290	0/1=10	1/1=0	rs58843120	PASS	0.0032	0.99,0.010	0.99361022,0.00638978	1,0	0.9971,0.0029	0.9992,0.0008	0.9801,0.0199	0.9908,0.0092	0.9936,0.00639	0.0166666666666667	0.00579500081374285		0.0100216588999229	2.0272952880207e-05	0.643486281850328	0.18675523829288	1	NA	1	0.00358831265979664	1	1
Eif2b4	EIF2B4	chr2	27590038	G	C	MODERATE	0/0=289	0/1=11	1/1=0	rs78599355	PASS	0.0056	0.98498353,0.015	0.99261182,0.00738818	1,0	0.9942,0.0058	0.9977,0.0023	0.9722,0.0278	0.998,0.002	0.9926,0.007388	0.0183333333333333	0.00595458699190754		0.0358443769821524	0.000130851449933633	0.232958070240791	0.000482306317213022	1	NA	1	0.018188351540775	1	0.147103426749972
Tnrc18	TNRC18	chr7	5434107	G	A	MODERATE	0/0=287	0/1=11	1/1=2	rs73057725	PASS	-0.0256	0.986,0.014	0.9884185,0.0115815	1,0	0.9784,0.0216	0.9992,0.0008	0.9583,0.0417	1,0	0.9884,0.01158	0.025	0.00613867119022182		0.685216881328954	6.62059909117829e-08	0.0800171864133273		1	NA	1	1.59556438097397e-05	1	NA
Shroom3	SHROOM3	chr4	77660162	G	C	MODERATE	0/0=24	0/1=120	1/1=156	rs344140	PASS	0.0223	0.284,0.716	0.335064,0.664936	0.3978,0.6022	0.2997,0.7003	0.388,0.612	0.2893,0.7107	0.271,0.729	0.3351,0.6649	0.72	0.00667972605926037	1.77171482018679e-06	0.436361303845034	4.49369174293501e-06	0.689853106732383	0.697320590558715	1	0.000352571249217171	1	0.000871776198129392	1	1
Kmt2c	KMT2C	chr7	151949735	T	C	MODERATE	0/0=284	0/1=16	1/1=0	rs77652527	PASS	0.0118	0.977,0.023	0.9872204,0.0127796	1,0	0.9813,0.0187	0.9985,0.0015	0.9543,0.0457	0.9969,0.0031	0.9872,0.01278	0.0266666666666667	0.00671271798588768		0.334110694961177	1.09384719726435e-07	0.0554021693370215	3.13674944021347e-05	1	NA	1	2.55960244159858e-05	1	0.0112922979847685
Brat1	BRAT1	chr7	2578238	C	T	MODERATE	0/0=269	0/1=19	1/1=2	rs62907961	PASS	0.0347	0.868,0.132	0.9311102,0.0688898	0.994,0.006	0.8372,0.1628	0.9924,0.0076	0.8569,0.1431	0.9264,0.0736	0.9311,0.06889	0.0396551724137931	0.00720368379467871	1.44360484788386e-06	1.35201196582391e-12	8.40655181910677e-07	1.01269900745388e-10	0.00678820490578236	1	0.000290164574424656	7.35494509408207e-10	0.000181581519292706	5.80276531271073e-08	1
Golga3	GOLGA3	chr12	133354262	C	T	MODERATE	0/0=285	0/1=15	1/1=0	rs143232411	PASS	0.0087	0.973,0.027	0.9882188,0.0117812	1,0	0.9856,0.0144	0.9992,0.0008	0.9543,0.0457	0.998,0.002	0.9882,0.01178	0.025	0.00733066323850284		0.167094822197728	6.62059909117829e-08	0.0357469162550092	1.69363961881608e-05	1	NA	1	1.59556438097397e-05	1	0.00630033938199582
Wdr19	WDR19	chr4	39216240	G	A	MODERATE	0/0=270	0/1=29	1/1=1	rs75964850	PASS	0.0076	0.966,0.034	0.9690495,0.0309505	0.9911,0.0089	0.9769,0.0231	0.9486,0.0514	0.9692,0.0308	0.9683,0.0317	0.969,0.03095	0.0516666666666667	0.00740983137514695	9.97066651464706e-08	0.00617821945550601	0.980441997812419	0.0357234044811447	0.047506679364905	1	2.22345863276629e-05	1	1	1	1
Ptpn12	PTPN12	chr7	77265140	G	A	MODERATE	0/0=269	0/1=31	1/1=0	rs2230602	PASS	0.0236	0.945,0.055	0.9690495,0.0309505	0.999,0.001	0.9582,0.0418	0.9962,0.0038	0.9135,0.0865	0.9663,0.0337	0.969,0.03095	0.0516666666666667	0.00740983137514695	1.99240623999231e-12	0.399987639238272	7.4806827399243e-13	0.00965291496528941	0.0789343936591085	1	5.5189652847787e-10	1	2.51350940061456e-10	1	1
Gtpbp10	GTPBP10	chr7	89984409	A	G	MODERATE	0/0=62	0/1=134	1/1=104	rs42664	PASS	0.0278	0.432,0.568	0.48742,0.51258	0.3532,0.6468	0.4683,0.5317	0.6891,0.3109	0.4483,0.5517	0.407,0.593	0.4874,0.5126	0.57	0.00781121787254468	0.00217162926457596	0.167319535056271	0	0.474940878092277	0.368162040793826	1	0.280140175130299	1	0	1	1
Bmp2k	BMP2K	chr4	79786856	G	A	MODERATE	0/0=271	0/1=28	1/1=1	rs2288255	PASS	0.0476	0.939,0.061	0.9193291,0.0806709	0.7708,0.2292	0.9683,0.0317	0.9977,0.0023	0.9602,0.0398	0.8896,0.1104	0.9193,0.08067	0.05	0.00788555584164173	4.31979823570515e-21	0.0946187523198385	8.99280649946377e-14	0.332918882150659	3.73317274565749e-05	1	1.46009180366834e-18	1	3.14748227481232e-11	1	0.0133647584294538
Tacc3	TACC3	chr4	1732978	G	A	MODERATE	0/0=184	0/1=104	1/1=12	rs17680881	PASS	0.0195	0.787,0.213	0.830072,0.169928	0.8522,0.1478	0.804,0.196	0.8669,0.1331	0.7366,0.2634	0.8722,0.1278	0.8301,0.1699	0.213333333333333	0.00812589733628921	0.000763115607330223	0.440375465244466	7.9304585633988e-06	0.0239609715887285	6.94208317564282e-06	1	0.106623697388857	1	0.00149092620991897	1	0.00270047035532506
Abcb8	ABCB8	chr7	150742408	G	T	MODERATE	0/0=273	0/1=26	1/1=1	rs59397762	PASS	0.0074	0.958,0.042	0.9726438,0.0273562	0.9802,0.0198	0.9582,0.0418	0.9879,0.0121	0.9404,0.0596	0.9877,0.0123	0.9726,0.02736	0.0466666666666667	0.0081664552400651	0.00219051202211218	0.670544459255793	2.66125866721367e-06	0.27046429040578	2.5004872172385e-05	1	0.280140175130299	1	0.00052959047477552	1	0.00920179295943768
Pom121	POM121	chr7	72418963	T	C	MODERATE	0/0=76	0/1=138	1/1=86	rs7056	VQSRTrancheSNP99.80to99.90	0.0310	0.459,0.541	0.426917,0.573083	0.5337,0.4663	0.4597,0.5403	0.3177,0.6823	0.4592,0.5408	0.408,0.592	0.4269,0.5731	0.516666666666667	0.0083989819515052	0.0506455772870198	0.395680475876004	3.13252153567203e-12	0.348438036783334	0.00340023641854504	1	1	1	1.02120202062908e-09	1	0.853459341054805
Gak	GAK	chr4	843720	T	C	MODERATE	0/0=291	0/1=9	1/1=0	rs2306242	PASS	0.0154	0.958,0.042	0.9646565,0.0353435	0.9137,0.0863	0.9654,0.0346	0.9939,0.0061	0.9632,0.0368	0.9785,0.0215	0.9647,0.03534	0.015	0.00854682430165023	5.33312080802617e-09	0.0257543465954349	0.0539281094750119	0.0113030366128664	0.358915910392695	1	1.29061523554233e-06	1	1	1	1
Abcb8	ABCB8	chr7	150730999	G	A	MODERATE	0/0=280	0/1=18	1/1=1	rs4148844	PASS	0.0094	0.949,0.051	0.9402955,0.0597045	0.9385,0.0615	0.951,0.049	0.9191,0.0809	0.9503,0.0497	0.953,0.047	0.9403,0.0597	0.0334448160535117	0.00879337825460531	0.0135348568363025	0.163614608488089	0.000106559654796215	0.123330048088558	0.192261723994142	1	1	1	0.0152380306358587	1	1
Fgl2	FGL2	chr7	76828953	C	T	MODERATE	0/0=234	0/1=65	1/1=1	rs2075761	PASS	0.0553	0.865991764,0.134	0.848243,0.151757	0.7371,0.2629	0.7378,0.2622	0.9402,0.0598	0.9135,0.0865	0.8497,0.1503	0.8482,0.1518	0.111666666666667	0.00886502760204931	4.29144867358055e-13	7.36154935895675e-12	6.9986521815002e-05	0.0975326212798078	0.0295577270112413	1	1.22306287197046e-10	3.97523665383665e-09	0.0106379513158803	1	1
Tmem119	TMEM119	chr12	108985976	G	A	MODERATE	0/0=279	0/1=21	1/1=0	rs112073168	PASS	0.0197	0.972,0.028	0.9810304,0.0189696	1,0	0.9885,0.0115	0.9992,0.0008	0.9702,0.0298	0.9427,0.0573	0.981,0.01897	0.035	0.00913052537467141		0.00438634786064052	6.89326373759513e-11	0.565273456549286	0.0459830721191281	1	NA	1	2.09555217622892e-08	1	1
Ube3b	UBE3B	chr12	109937534	G	A	MODERATE	0/0=53	0/1=150	1/1=97	rs7298565	PASS	0.0448	0.49,0.510	0.482827,0.517173	0.6895,0.3105	0.5101,0.4899	0.2269,0.7731	0.4583,0.5417	0.6217,0.3783	0.4828,0.5172	0.573333333333333	0.00924821583721847	0	0.00271529167245443	3.54545564535653e-19	0.217347113819022	4.15223411209809e-14	1	0	1	1.35081860088084e-16	1	2.1757706747394e-11
Oas3	OAS3	chr12	113379390	C	T	MODERATE	0/0=290	0/1=10	1/1=0	rs12819767	PASS	0.0137	0.986,0.014	0.99321086,0.00678914	0.999,0.001	0.9957,0.0043	0.9992,0.0008	0.9732,0.0268	0.998,0.002	0.9932,0.006789	0.0166666666666667	0.0095577066607202	0.000228836436801938	0.0260261473239236	2.0272952880207e-05	0.190154161928859	0.00110772606795062	1	0.0347831383938946	1	0.00358831265979664	1	0.307947846890272
Prom1	PROM1	chr4	16077475	A	C	MODERATE	0/0=290	0/1=10	1/1=0	rs189108830	PASS	0.0337	0.987,0.013	0.99321086,0.00678914	1,0	0.9625,0.0375	0.9992,0.0008	0.995,0.005	0.998,0.002	0.9932,0.006789	0.0166666666666667	0.0095577066607202		0.0231070759301306	2.0272952880207e-05	0.0188237226921417	0.00110772606795062	1	NA	1	0.00358831265979664	1	0.307947846890272
Gsap	GSAP	chr7	76950686	C	A	MODERATE	0/0=271	0/1=28	1/1=1	rs17151689	PASS	0.0235	0.944,0.056	0.9205272,0.0794728	0.9276,0.0724	0.9568,0.0432	0.8797,0.1203	0.9632,0.0368	0.8988,0.1012	0.9205,0.07947	0.05	0.0101849044556996	0.0759974183791694	0.561791823137042	1.62074536447167e-06	0.200658991076589	0.00031340540341765	1	1	1	0.000341977271903522	1	0.099349512883395
Zfp518b	ZNF518B	chr4	10447168	C	G	MODERATE	0/0=179	0/1=101	1/1=20	rs66538112	PASS	0.0232	0.749991764,0.250	0.808906,0.191094	0.7937,0.2063	0.7233,0.2767	0.9236,0.0764	0.7565,0.2435	0.7843,0.2157	0.8089,0.1911	0.235	0.0104306128194347	0.176922491374367	0.0870723597842983	0	0.699746421005405	0.371297943237021	1	1	1	0	1	1
Mblac1	MBLAC1	chr7	99725146	C	G	MODERATE	0/0=286	0/1=11	1/1=1	rs78225095	PASS	-0.0017	0.961,0.039	0.9560703,0.0439297	0.9593,0.0407	0.9597,0.0403	0.9705,0.0295	0.9304,0.0696	0.9571,0.0429	0.9561,0.04393	0.0218120805369128	0.0105567556297376	0.0427465268830787	0.0590413698200925	0.337336318747264	3.0365147075234e-05	0.0270547320278447	1	1	1	1	0.0164275445677016	1
Lrpap1	LRPAP1	chr4	3526642	T	C	MODERATE	0/0=282	0/1=18	1/1=0	rs2228158	PASS	0.0301	0.98,0.020	0.9842252,0.0157748	1,0	0.9726,0.0274	0.9932,0.0068	0.9732,0.0268	0.9755,0.0245	0.9842,0.01577	0.03	0.0115493084361118		0.779635501441339	6.18978564221884e-05	0.706861795720949	0.509747848714453	1	NA	1	0.00947037203259482	1	1
Ncor2	NCOR2	chr12	124821413	G	A	MODERATE	0/0=281	0/1=18	1/1=1	rs2230944	PASS	0.0222	0.951,0.049	0.9416933,0.0583067	0.9702,0.0298	0.9712,0.0288	0.9622,0.0378	0.9543,0.0457	0.8507,0.1493	0.9417,0.05831	0.0333333333333333	0.0116704071206557	0.693107019585614	0.638408509549591	0.628052369698347	0.227066476007859	3.13253194375867e-13	1	1	1	1	1	1.61638648297947e-10
Cep135	CEP135	chr4	56820412	G	A	MODERATE	0/0=285	0/1=15	1/1=0	rs77591659	PASS	0.0104	0.972,0.028	0.9876198,0.0123802	1,0	0.9885,0.0115	0.9985,0.0015	0.9563,0.0437	0.9918,0.0082	0.9876,0.01238	0.025	0.012064576101608		0.0667189215440163	3.37361668156788e-07	0.0538856892073734	0.00689093923077078	1	NA	1	7.56299300685993e-05	1	1
Micall2	MICALL2	chr7	1486451	G	A	MODERATE	0/0=260	0/1=38	1/1=2	rs75056037	PASS	0.0367	0.905,0.095	0.897764,0.102236	0.9712,0.0288	0.7565,0.2435	0.8646,0.1354	0.9195,0.0805	0.9448,0.0552	0.8978,0.1022	0.07	0.0123908681475145	0.0001008312359565	3.60408081962679e-17	3.11568329305621e-05	0.443978184994895	0.23244926821644	1	0.016536322696866	2.02549342063026e-14	0.00507856376768162	1	1
Wbscr27	WBSCR27	chr7	73249299	G	C	MODERATE	0/0=57	0/1=104	1/1=137	rs13232463	PASS	0.0371	0.337,0.663	0.41893,0.58107	0.4187,0.5813	0.3876,0.6124	0.5371,0.4629	0.2744,0.7256	0.4305,0.5695	0.4189,0.5811	0.634228187919463	0.0127249328847259	0.0364614600439102	0.420072594122599	3.6883829324097e-12	0.00012942470342632	0.0111977669761378	1	1	1	1.19872445303315e-09	0.0685950928159496	1
Prr14l	PRR14L	chr22	32110943	G	A	MODERATE	0/0=258	0/1=40	1/1=2	rs140079	PASS	0.0283	0.931,0.069	0.894169,0.105831	0.9683,0.0317	0.8127,0.1873	0.792,0.208	0.9404,0.0596	0.9663,0.0337	0.8942,0.1058	0.0733333333333333	0.0130753990757279	0.000141176512414631	2.0623268242013e-09	1.93449367584392e-13	0.279222784000291	0.000387559097713819	1	0.0227294184987556	1.07653460223308e-06	6.65465824490308e-11	1	0.120143320291284
Prr14l	PRR14L	chr22	32113164	T	G	MODERATE	0/0=289	0/1=11	1/1=0	rs117519233	PASS	0.0263	0.982,0.018	0.9616613,0.0383387	0.9762,0.0238	0.8329,0.1671	0.9902,0.0098	0.9771,0.0229	0.9836,0.0164	0.9617,0.03834	0.0183333333333333	0.0131676064901525	0.467434147903116	2.93852813786624e-19	0.118161761036569	0.53876763908572	0.773896634115811	1	1	1.66908398230802e-16	1	1	1
Abcb8	ABCB8	chr7	150732812	C	T	MODERATE	0/0=273	0/1=25	1/1=1	rs17545756	PASS	0.0079	0.957,0.043	0.9728435,0.0271565	0.9802,0.0198	0.9582,0.0418	0.9894,0.0106	0.9394,0.0606	0.9877,0.0123	0.9728,0.02716	0.0451505016722408	0.0133131599033676	0.00355565167179828	0.768091359357948	1.24117444078031e-06	0.188780566692016	4.66043385003445e-05	1	0.437345155631188	1	0.000264370155886206	1	0.0164513314906216
Ddx54	DDX54	chr12	113600940	C	T	MODERATE	0/0=272	0/1=26	1/1=2	rs11564	PASS	0.0179	0.95,0.050	0.9690495,0.0309505	1,0	0.9553,0.0447	0.975,0.025	0.9195,0.0805	0.9898,0.0102	0.969,0.03095	0.05	0.0135559048401936		0.653780676317928	0.00435509934229228	0.0197381781179443	1.0379584252096e-06	1	NA	1	0.461640530282982	1	0.000436980497013242
Chst12	CHST12	chr7	2472455	A	T	MODERATE	0/0=272	0/1=27	1/1=1	rs3735100	PASS	0.0357	0.938,0.062	0.9241214,0.0758786	0.8462,0.1538	0.9438,0.0562	0.9841,0.0159	0.9602,0.0398	0.8722,0.1278	0.9241,0.07588	0.0483333333333333	0.0142027381757455	1.31922652922372e-10	0.527112930556803	3.49655454796594e-05	0.414717334134352	2.41780736847158e-07	1	3.41679671068943e-08	1	0.0055944872767455	1	0.000105174620528514
Ncor2	NCOR2	chr12	124821416	C	T	MODERATE	0/0=281	0/1=18	1/1=1	rs2227277	PASS	0.0202	0.952,0.048	0.9426917,0.0573083	0.9702,0.0298	0.9712,0.0288	0.9652,0.0348	0.9553,0.0447	0.8507,0.1493	0.9427,0.05731	0.0333333333333333	0.0147028221140231	0.693107019585614	0.638408509549591	0.870034939324995	0.26336636409977	3.13253194375867e-13	1	1	1	1	1	1.61638648297947e-10
Chst12	CHST12	chr7	2472429	C	A	MODERATE	0/0=272	0/1=27	1/1=1	rs3735099	PASS	0.0348	0.939,0.061	0.9245208,0.0754792	0.8462,0.1538	0.9438,0.0562	0.9856,0.0144	0.9602,0.0398	0.8722,0.1278	0.9245,0.07548	0.0483333333333333	0.0154351584547332	1.31922652922372e-10	0.527112930556803	1.00553824400329e-05	0.414717334134352	2.41780736847158e-07	1	3.41679671068943e-08	1	0.00185019036896605	1	0.000105174620528514
Ankle2	ANKLE2	chr12	133303973	C	G	MODERATE	0/0=255	0/1=43	1/1=2	rs77646743	PASS	-0.0065	0.959,0.041	0.9456869,0.0543131	0.8929,0.1071	0.9553,0.0447	0.9985,0.0015	0.9195,0.0805	0.9489,0.0511	0.9457,0.05431	0.0783333333333333	0.0163714121152418	0.0586811228164052	0.0112553096895616	0	0.87673915080659	0.0287653931152911	1	1	1	0	1	1
Srrd	SRRD	chr22	26884039	G	A	MODERATE	0/0=12	0/1=67	1/1=221	rs4820682	PASS	0.0409	0.132,0.868	0.191693,0.808307	0.1915,0.8085	0.1628,0.8372	0.3366,0.6634	0.0905,0.9095	0.1207,0.8793	0.1917,0.8083	0.848333333333333	0.0175871114721096	0.0427964665868064	0.583645672279701	0	0.000183672726792952	0.0781563937309877	1	1	1	0	0.0967955270198857	1
Medag	MEDAG	chr13	31480720	G	A	MODERATE	0/0=286	0/1=8	1/1=4	rs71436423	PASS	0.0342	0.903,0.097	0.951877,0.048123	0.998,0.002	0.9337,0.0663	0.9697,0.0303	0.8738,0.1262	0.9734,0.0266	0.9519,0.04812	0.0268456375838926	0.0189012710971226	5.04867504624862e-06	0.000957898664778823	0.677661468747818	1.55978570215397e-11	0.976604134508688	1	0.000964296933833486	0.385075263241087	1	8.98436564440687e-09	1
Taok3	TAOK3	chr12	118682751	C	T	MODERATE	0/0=34	0/1=120	1/1=146	rs428073	PASS	0.0169	0.286,0.714	0.26877,0.73123	0.2857,0.7143	0.2392,0.7608	0.2549,0.7451	0.3171,0.6829	0.2413,0.7587	0.2688,0.7312	0.686666666666667	0.0206668758961125	0.240404543654868	0.00285339487065037	0.00771860804119967	0.875158920543173	0.00172652893456883	1	1	1	0.717830547831569	1	0.460983225529878
Ptpn13	PTPN13	chr4	87706506	T	G	MODERATE	0/0=91	0/1=144	1/1=65	rs989902	PASS	0.0626	0.573,0.427	0.493411,0.506589	0.5546,0.4454	0.536,0.464	0.1732,0.8268	0.5974,0.4026	0.726,0.274	0.4934,0.5066	0.456666666666667	0.0208240205651808	0.660484921530006	0.791841597241035	7.94402027040758e-62	0.0338559948706461	1.19015908239817e-13	1	1	1	3.51920097979056e-59	1	6.20072881929447e-11
Ptpn13	PTPN13	chr4	87622624	G	A	MODERATE	0/0=289	0/1=11	1/1=0	rs61730646	PASS	0.0094	0.988,0.012	0.99141374,0.00858626	1,0	0.9971,0.0029	1,0	0.992,0.008	0.9663,0.0337	0.9914,0.008586	0.0183333333333333	0.0208662935467214		0.0055239917736134		0.0642463351937574	0.0717525369940079	1	NA	1	NA	1	1
Naa25	NAA25	chr12	112471090	G	T	MODERATE	0/0=253	0/1=45	1/1=2	rs12298022	PASS	0.0650	0.91898353,0.081	0.88758,0.11242	1,0	0.902,0.098	0.702,0.298	0.9294,0.0706	0.9693,0.0307	0.8876,0.1124	0.0816666666666667	0.0224268555214988		0.306953304664666	1.70394049276131e-25	0.41457022558449	6.60120667617115e-06	1	NA	1	6.78168316119001e-23	1	0.00258107181038292
Bod1l	BOD1L1	chr4	13603591	C	T	MODERATE	0/0=287	0/1=13	1/1=0	rs17807493	PASS	0.0134	0.974,0.026	0.9890176,0.0109824	1,0	0.9856,0.0144	0.9992,0.0008	0.9652,0.0348	0.9908,0.0092	0.989,0.01098	0.0216666666666667	0.023840901827697		0.323795017064574	6.52869406314593e-07	0.1348800939201	0.0403173464132931	1	NA	1	0.000144284138795525	1	1
Mlxipl	MLXIPL	chr7	73020337	C	G	MODERATE	0/0=248	0/1=48	1/1=4	rs3812316	PASS	0.0138	0.914,0.086	0.9317093,0.0682907	0.9147,0.0853	0.9597,0.0403	0.9758,0.0242	0.8837,0.1163	0.9192,0.0808	0.9317,0.06829	0.0933333333333333	0.0239756446265016	0.582931264555503	0.000112448889724392	1.82438508744553e-11	0.150957939631005	0.387567460875658	1	1	0.0480156759123154	5.69208147283005e-09	1	1
D5Ertd579e	KIAA0232	chr4	6865521	C	T	MODERATE	0/0=278	0/1=22	1/1=0	rs116439703	PASS	0.0118	0.959,0.041	0.9780351,0.0219649	0.998,0.002	0.9669,0.0331	0.9992,0.0008	0.9672,0.0328	0.9479,0.0521	0.978,0.02196	0.0366666666666667	0.0247860800117012	2.97541358218467e-08	0.726844753180808	2.19211315766188e-11	0.680192088805686	0.156397499054536	1	6.96246778231213e-06	1	6.79555078875183e-09	1	1
Alkbh4	ALKBH4	chr7	102098010	G	A	MODERATE	0/0=252	0/1=35	1/1=11	rs41275227	PASS	0.0205	0.842,0.158	0.872404,0.127596	0.8522,0.1478	0.8847,0.1153	0.9932,0.0068	0.835,0.165	0.7597,0.2403	0.8724,0.1276	0.0956375838926175	0.0253313059936381	0.00254900464952242	0.253160961690199	0	0.000105925525663004	7.9765361104962e-13	1	0.321174585839825	1	0	0.0563523796527181	4.08398648857405e-10
Rad9b	RAD9B	chr12	110960196	G	A	MODERATE	0/0=271	0/1=27	1/1=2	rs34513555	PASS	0.0191	0.954,0.046	0.923123,0.076877	0.9315,0.0685	0.9654,0.0346	0.8487,0.1513	0.9622,0.0378	0.9448,0.0552	0.9231,0.07688	0.0516666666666667	0.0259623067796439	0.17653031674061	0.129159245015922	4.84184085759339e-10	0.185007683819296	0.762773135974999	1	1	1	1.41381753041727e-07	1	1
Serpine1	SERPINE1	chr7	100771717	G	A	MODERATE	0/0=244	0/1=54	1/1=2	rs6092	PASS	0.0158	0.904,0.096	0.9285144,0.0714856	0.9028,0.0972	0.9193,0.0807	0.9977,0.0023	0.9016,0.0984	0.8957,0.1043	0.9285,0.07149	0.0966666666666667	0.0261356377903175	0.972120721715729	0.312259108717475	0	0.90991106983051	0.625797818832683	1	1	1	0	1	1
Agfg2	AGFG2	chr7	100160264	T	C	MODERATE	0/0=229	0/1=55	1/1=16	rs17855473	PASS	0.0385	0.829,0.171	0.818291,0.181709	0.9812,0.0188	0.8545,0.1455	0.6551,0.3449	0.8131,0.1869	0.8507,0.1493	0.8183,0.1817	0.145	0.0262503429374457	0	0.979692744514541	1.88000719630774e-19	0.0310666617132336	0.815193935751752	1	0	1	7.20042756185864e-17	1	1
Lrrc8c	LRRC8C	chr1	90179532	A	G	MODERATE	0/0=234	0/1=62	1/1=4	rs12032393	PASS	0.0270	0.843,0.157	0.849441,0.150559	0.75,0.25	0.7911,0.2089	0.9675,0.0325	0.8469,0.1531	0.8364,0.1636	0.8494,0.1506	0.116666666666667	0.0266969454033943	1.03610214161419e-10	8.77764014973222e-06	3.60378393793326e-13	0.0414800565367552	0.010320550243017	1	2.71458761102918e-08	0.00413426851052388	1.22168275495938e-10	1	1
Add1	ADD1	chr4	2906707	G	T	MODERATE	0/0=205	0/1=88	1/1=7	rs4961	PASS	0.0494	0.798,0.202	0.791534,0.208466	0.5476,0.4524	0.8256,0.1744	0.9508,0.0492	0.7952,0.2048	0.7996,0.2004	0.7915,0.2085	0.17	0.0272325885568941	1.24041658793685e-30	0.834464835715288	0	0.0866102002969644	0.134176157311031	1	4.40347888717582e-28	1	0	1	1
Idua	IDUA	chr4	994414	G	A	MODERATE	0/0=226	0/1=68	1/1=6	rs3755955	PASS	0.0248	0.836991755,0.163	0.83127,0.16873	0.7927,0.2073	0.9092,0.0908	0.8729,0.1271	0.833,0.167	0.7577,0.2423	0.8313,0.1687	0.133333333333333	0.0272647740374878	0.000186771401091707	0.0149548680262406	0.705641641028985	0.0708841759477339	1.56535948897377e-07	1	0.0292585408924861	1	1	1	6.89123693429217e-05
Daglb	DAGLB	chr7	6449496	T	C	MODERATE	0/0=195	0/1=91	1/1=14	rs2303361	PASS	0.0292	0.809,0.191	0.837061,0.162939	0.7331,0.2669	0.8184,0.1816	0.9455,0.0545	0.7893,0.2107	0.8599,0.1401	0.8371,0.1629	0.198333333333333	0.0279439066725427	0.00188487053257649	0.443587349509865	0	0.553369687071408	0.00231948849422925	1	0.245033169234944	1	0	1	0.603067008499605
Usp42	USP42	chr7	6193752	G	A	MODERATE	0/0=270	0/1=18	1/1=4	rs61753119	PASS	0.0234	0.907,0.093	0.9317093,0.0682907	0.9911,0.0089	0.8775,0.1225	0.9516,0.0484	0.8618,0.1382	0.954,0.046	0.9317,0.06829	0.0445205479452055	0.0283473831801601	2.96684852152396e-06	8.19368299068411e-07	0.712770955603094	3.54248779924217e-09	0.891958512552095	1	0.000575568613175648	0.000401490466543521	1	2.00150560657183e-06	1
Aacs	AACS	chr12	125561151	A	G	MODERATE	0/0=202	0/1=87	1/1=11	rs12831803	PASS	0.0318	0.836,0.164	0.779353,0.220647	0.8829,0.1171	0.8112,0.1888	0.6452,0.3548	0.8559,0.1441	0.7526,0.2474	0.7794,0.2206	0.181666666666667	0.0284607136168132	0.000323164091081907	0.741998645079875	1.72469327582496e-14	0.0459294772789531	0.00230303696903936	1	0.0475051213890403	1	6.17440192745336e-12	1	0.601092648919273
Depdc5	DEPDC5	chr22	32200849	C	T	MODERATE	0/0=290	0/1=9	1/1=1	rs41311139	PASS	0.0051	0.977,0.023	0.99101438,0.00898562	1,0	0.9798,0.0202	0.9985,0.0015	0.9761,0.0239	0.9949,0.0051	0.991,0.008986	0.0183333333333333	0.0295404277584339		0.807865705824759	2.98121208182067e-05	0.46010024799172	0.0108284510804999	1	NA	1	0.00500843629745872	1	1
Lmbr1	LMBR1	chr7	156554830	T	C	MODERATE	0/0=265	0/1=32	1/1=3	rs6957768	PASS	0.0178	0.928,0.072	0.9103435,0.0896565	0.8661,0.1339	0.9294,0.0706	0.9062,0.0938	0.9264,0.0736	0.9315,0.0685	0.9103,0.08966	0.0633333333333333	0.0304831312657397	1.00061827755905e-05	0.602688336486697	0.025894346512361	0.434625942987486	0.68931493245476	1	0.00186114999625983	1	1	1	1
Lgi2	LGI2	chr4	25005356	T	C	MODERATE	0/0=283	0/1=16	1/1=1	rs2232027	PASS	0.0106	0.967,0.033	0.9826278,0.0173722	1,0	0.9769,0.0231	0.9947,0.0053	0.9602,0.0398	0.9755,0.0245	0.9826,0.01737	0.03	0.0310463248736179		0.439235482205645	9.51237043245179e-06	0.308693065708232	0.509747848714453	1	NA	1	0.00175978853000358	1	1
Ptpn13	PTPN13	chr4	87724970	G	A	MODERATE	0/0=288	0/1=12	1/1=0	rs61750816	PASS	0.0126	0.98,0.020	0.9898163,0.0101837	0.999,0.001	0.9899,0.0101	0.9977,0.0023	0.9632,0.0368	0.9969,0.0031	0.9898,0.01018	0.02	0.0310875776191621	3.89601166184139e-05	0.139913201921364	4.48942159769761e-05	0.0583147229698896	0.000793380229362706	1	0.00685698052484085	1	0.00700349769240827	1	0.230080266515185
Mrpl1	MRPL1	chr4	78830434	G	C	MODERATE	0/0=288	0/1=12	1/1=0	rs1801350	PASS	0.0170	0.963991762,0.036	0.9628594,0.0371406	1,0	0.9712,0.0288	0.9357,0.0643	0.9543,0.0457	0.9642,0.0358	0.9629,0.03714	0.02	0.0315677518342482		0.309304683005369	3.93993748728134e-05	0.00756254502446329	0.0731160559155577	1	NA	1	0.00622510122990452	1	1
Sorcs2	SORCS2	chr4	7716932	T	C	MODERATE	0/0=7	0/1=36	1/1=257	rs6816604	PASS	0.0331	0.049,0.951	0.061102,0.938898	0.001,0.999	0.0389,0.9611	0.1626,0.8374	0.0417,0.9583	0.0215,0.9785	0.0611,0.9389	0.916666666666667	0.0348131129273607	8.16856611413867e-20	0.000753380602231319	2.99830393846179e-06	0.000512572484352866	8.86242268927496e-09	1	2.68745825155162e-17	0.308132666312609	0.000593664179815434	0.264999974410432	4.15647624126996e-06
Fras1	FRAS1	chr4	79387464	A	G	MODERATE	0/0=4	0/1=2	1/1=294	rs7684722	PASS	0.0742	0.01,0.990	0.032348,0.967652	0,1	0.0101,0.9899	0.1157,0.8843	0.002,0.998	0,1	0.03235,0.9677	0.983333333333333	0.0352743442356152	3.92952111836282e-05	0.301015305701891	5.11146680537422e-13	0.000966463994426228	5.11783577193794e-05	1	0.00685698052484085	1	1.72767578021649e-10	0.496762493135081	0.0179636035595022
Gbp4	GBP6	chr1	89849742	A	T	MODERATE	0/0=6	0/1=53	1/1=241	rs959460	PASS	0.0142	0.117,0.883	0.139377,0.860623	0.2728,0.7272	0.0807,0.9193	0.084,0.916	0.1103,0.8897	0.1483,0.8517	0.1394,0.8606	0.891666666666667	0.0360888883349892	5.55111512312578e-15	0.0886487358290758	0.0865815490655691	0.902846656776874	0.0232757753049606	1	1.69864122767649e-12	1	1	1	1
Gbp8	GBP6	chr1	89849742	A	T	MODERATE	0/0=6	0/1=53	1/1=241	rs959460	PASS	0.0142	0.117,0.883	0.139377,0.860623	0.2728,0.7272	0.0807,0.9193	0.084,0.916	0.1103,0.8897	0.1483,0.8517	0.1394,0.8606	0.891666666666667	0.0360888883349892	5.55111512312578e-15	0.0886487358290758	0.0865815490655691	0.902846656776874	0.0232757753049606	1	1.69864122767649e-12	1	1	1	1
Fam185a	FAM185A	chr7	102427887	T	C	MODERATE	0/0=300	0/1=0	1/1=0	rs374821683		?	?	0.9928115,0.0071885	0.996,0.004	0.9971,0.0029	0.9992,0.0008	0.9771,0.0229	0.9939,0.0061	0.9928,0.007188	0	0.0372057993190931	0.120868311805227	0.186795755407005	0.488302637429354	0.000188742718874986	0.0552710600518605	1	1	1	1	0.0992786701282426	1
Pole	POLE	chr12	133220526	T	C	MODERATE	0/0=217	0/1=76	1/1=7	rs5744934	PASS	0.0295	0.882,0.118	0.879393,0.120607	0.9911,0.0089	0.9207,0.0793	0.829,0.171	0.8698,0.1302	0.8129,0.1871	0.8794,0.1206	0.15	0.0388158531751677	0	5.8136210954185e-05	0.249774228447804	0.26514506273934	0.0585635981142077	1	0	0.0258124776636581	1	1	1
Pom121	POM121	chr7	72418992	C	T	MODERATE	0/0=234	0/1=64	1/1=2	rs9955	PASS	0.0414	0.861,0.139	0.855631,0.144369	0.7232,0.2768	0.7882,0.2118	0.9766,0.0234	0.8718,0.1282	0.8599,0.1401	0.8556,0.1444	0.113333333333333	0.0390237459497458	1.29456839069415e-14	2.07896046287095e-06	2.22044604925031e-16	0.379606797796463	0.124735018260229	1	3.85781380426857e-12	0.000999979982640927	8.34887714518117e-14	1	1
Zfp113	ZNF3	chr7	99669802	A	G	MODERATE	0/0=225	0/1=70	1/1=5	rs11550034	PASS	0.0232	0.857,0.143	0.894369,0.105631	0.8601,0.1399	0.853,0.147	0.9629,0.0371	0.8777,0.1223	0.8834,0.1166	0.8944,0.1056	0.133333333333333	0.0393030776787791	0.711482812746118	0.480719376073507	5.55111512312578e-15	0.519805711055178	0.32580227681439	1	1	1	2.00950367457153e-12	1	1
Dbf4	DBF4	chr7	87537177	A	G	MODERATE	0/0=274	0/1=26	1/1=0	rs2041049	PASS	0.0242	0.956,0.044	0.9351038,0.0648962	0.9137,0.0863	0.9251,0.0749	0.8979,0.1021	0.9791,0.0209	0.9693,0.0307	0.9351,0.0649	0.0433333333333333	0.039340335592997	0.00111352628833891	0.0173356338377317	1.63559697403727e-05	0.00989096124917066	0.188003792277269	1	0.152553101502431	1	0.00294407455326709	1	1
Cux1	CUX1	chr7	101917521	G	A	MODERATE	0/0=74	0/1=143	1/1=83	rs803064	PASS	0.0050	0.432,0.568	0.440895,0.559105	0.502,0.498	0.4928,0.5072	0.3828,0.6172	0.4642,0.5358	0.3957,0.6043	0.4409,0.5591	0.515	0.0399731059166996	0.509629946181547	0.779548505273823	2.50735323039776e-05	0.419232719585193	0.000503892078260902	1	1	1	0.00428757402398017	1	0.152679299713053
Alkbh2	ALKBH2	chr12	109527872	T	C	MODERATE	0/0=289	0/1=11	1/1=0	rs139644396	PASS	0.0156	0.982,0.018	0.99061502,0.00938498	0.999,0.001	0.9827,0.0173	0.9985,0.0015	0.9722,0.0278	0.9959,0.0041	0.9906,0.009385	0.0183333333333333	0.0406226192567285	9.4368176855264e-05	0.888445651055609	2.98121208182067e-05	0.232958070240791	0.00468777508177909	1	0.0158538537116844	1	0.00500843629745872	1	1
Auts2	AUTS2	chr7	70228020	G	T	MODERATE	0/0=265	0/1=33	1/1=2	rs2293507	PASS	0.0311	0.944991763,0.055	0.9139377,0.0860623	0.8968,0.1032	0.9582,0.0418	0.8525,0.1475	0.9692,0.0308	0.9264,0.0736	0.9139,0.08606	0.0616666666666667	0.0411684816543696	0.00440443803871344	0.105286212227689	8.68416793960476e-08	0.0029585292145291	0.364114882543546	1	0.515319250529472	1	2.05814780168633e-05	1	1
Spon2	SPON2	chr4	1164277	C	G	MODERATE	0/0=62	0/1=118	1/1=120	rs2279279	PASS	0.0690	0.361,0.639	0.446685,0.553315	0.3234,0.6766	0.2911,0.7089	0.7761,0.2239	0.3171,0.6829	0.3722,0.6278	0.4467,0.5533	0.596666666666667	0.0433230107418821	0.00118150327115292	2.22819948795901e-05	0	0.000453921955676052	0.217056799317947	1	0.159502941605644	0.0102274356497319	0	0.235131573040195	1
Uvssa	UVSSA	chr4	1374774	C	T	MODERATE	0/0=32	0/1=140	1/1=125	rs28522910	PASS	0.0262	0.31,0.690	0.303514,0.696486	0.3016,0.6984	0.2219,0.7781	0.3003,0.6997	0.335,0.665	0.3354,0.6646	0.3035,0.6965	0.656565656565657	0.0462556664662831	0.0822147049358738	1.21353265986265e-06	0.0598296438288356	0.730431116844692	0.744114658737898	1	1	0.000589776872693248	1	1	1
Por	POR	chr7	75615006	C	T	MODERATE	0/0=168	0/1=114	1/1=17	rs1057868	PASS	0.0259	0.724,0.276	0.713858,0.286142	0.626,0.374	0.7205,0.2795	0.8298,0.1702	0.7048,0.2952	0.6524,0.3476	0.7139,0.2861	0.247491638795987	0.047117250631849	1.7420305005981e-07	0.193480137782763	7.36639777036974e-05	0.0390521955219586	3.03067617471076e-05	1	3.79762649130386e-05	1	0.0111232606332583	1	0.010971047752453
Zfp664	ZNF664	chr12	124496864	T	G	MODERATE	0/0=258	0/1=42	1/1=0	rs80197353	PASS	-0.0856	0.92,0.080	0.9490815,0.0509185	1,0	0.9553,0.0447	0.9667,0.0333	0.9016,0.0984	0.9172,0.0828	0.9491,0.05092	0.07	0.048583113754078		0.0492049155954961	0.000311267122836023	0.0517043355250526	0.357161418657541	1	NA	1	0.040464725968683	1	1
Ep400	EP400	chr12	132562126	G	A	MODERATE	0/0=241	0/1=55	1/1=4	rs73164912	PASS	0.0297	0.888991763,0.111	0.9183307,0.0816693	0.9881,0.0119	0.928,0.072	0.857,0.143	0.8787,0.1213	0.9632,0.0368	0.9183,0.08167	0.105	0.0517553036124094	0	0.035980986509871	0.0221978771653123	0.322298338490246	5.83564856437846e-08	1	0	1	1	1	2.6552200967922e-05
Afp	AFP	chr4	74310768	C	G	MODERATE	0/0=285	0/1=15	1/1=0	rs41265657	PASS	0.0106	0.98,0.020	0.9854233,0.0145767	0.999,0.001	0.9798,0.0202	0.9992,0.0008	0.9791,0.0209	0.9632,0.0368	0.9854,0.01458	0.025	0.0522147362265495	2.75399959392963e-06	0.560874417155198	6.62059909117829e-08	0.59143308083969	0.198159447304402	1	0.000537029920816278	1	1.59556438097397e-05	1	1
P2rx7	P2RX7	chr12	121615103	G	A	MODERATE	0/0=121	0/1=141	1/1=38	rs1718119	PASS	0.0433	0.641991764,0.358	0.677516,0.322484	0.8581,0.1419	0.7997,0.2003	0.5401,0.4599	0.6173,0.3827	0.6524,0.3476	0.6775,0.3225	0.361666666666667	0.0531292331948541	0	9.05344688106879e-11	5.53546652301369e-05	0.399593854527684	0.570293064789615	1	0	4.8435940813718e-08	0.00852461844544108	1	1
Acacb	ACACB	chr12	109623516	G	A	MODERATE	0/0=197	0/1=92	1/1=11	rs2300455	PASS	0.0260	0.811,0.189	0.840455,0.159545	0.7361,0.2639	0.8429,0.1571	0.9841,0.0159	0.8419,0.1581	0.7505,0.2495	0.8405,0.1595	0.19	0.056199162312556	0.000741829602499478	0.1181447725965	0	0.0997004834886301	0.00615113808488337	1	0.104597973952426	1	0	1	1
Kdr	KDR	chr4	55979558	C	T	MODERATE	0/0=232	0/1=62	1/1=6	rs2305948	PASS	0.0280	0.891,0.109	0.847444,0.152556	0.8333,0.1667	0.9049,0.0951	0.7564,0.2436	0.9056,0.0944	0.8845,0.1155	0.8474,0.1526	0.123333333333333	0.0577800971429008	0.0186701109830929	0.102997651841435	1.53641967184694e-09	0.0675267945753801	0.640203485069519	1	1	1	4.34806767132684e-07	1	1
Uspl1	USPL1	chr13	31231778	G	C	MODERATE	0/0=287	0/1=13	1/1=0	rs17609459	PASS	0.0235	0.98593411,0.014	0.9876198,0.0123802	1,0	0.987,0.013	0.9796,0.0204	0.9801,0.0199	0.9939,0.0061	0.9876,0.01238	0.0216666666666667	0.0612988615542689		0.229361442331873	0.856897273310014	0.809280232703223	0.00587386121389333	1	NA	1	1	1	1
Slc5a6	SLC5A6	chr2	27423913	G	A	MODERATE	0/0=268	0/1=30	1/1=2	rs61737373	PASS	0.0175	0.94,0.060	0.9594649,0.0405351	0.998,0.002	0.9611,0.0389	0.9985,0.0015	0.9314,0.0686	0.8947,0.1053	0.9595,0.04054	0.0566666666666667	0.0634481941101972	7.7937656328686e-13	0.13262981984097	2.22044604925031e-16	0.345040484076927	0.000865596550710131	1	2.19004814283608e-10	1	8.34887714518117e-14	1	0.244963823850967
Tacc3	TACC3	chr4	1729953	G	A	MODERATE	0/0=205	0/1=80	1/1=13	rs17132047	PASS	0.0234	0.796,0.204	0.850839,0.149161	0.8522,0.1478	0.8127,0.1873	0.941,0.059	0.7366,0.2634	0.8722,0.1278	0.8508,0.1492	0.177852348993289	0.065289788915261	0.111692108309567	0.661692491244672	2.22044604925031e-16	8.73377882449135e-05	0.00648926994289867	1	1	1	8.34887714518117e-14	0.0468130544992736	1
Fras1	FRAS1	chr4	79240063	A	G	MODERATE	0/0=113	0/1=137	1/1=50	rs345513	PASS	0.0065	0.58997518,0.410	0.565695,0.434305	0.5962,0.4038	0.5461,0.4539	0.4909,0.5091	0.6054,0.3946	0.6084,0.3916	0.5657,0.4343	0.395	0.0661110232611194	0.727618953950167	0.0326536079436497	3.44395081757087e-06	0.98734228482129	0.893208200514915	1	1	1	0.000675014360243891	1	1
Fam175a	FAM175A	chr4	84383810	C	T	MODERATE	0/0=114	0/1=144	1/1=42	rs12642536	PASS	0.0671	0.56891763,0.431	0.58107,0.41893	0.3244,0.6756	0.4741,0.5259	0.8775,0.1225	0.6213,0.3787	0.4796,0.5204	0.5811,0.4189	0.38	0.0673943698209673	6.22317508068841e-31	1.49784471537383e-07	0	0.958573030557001	5.74059625343885e-08	1	2.22167350380576e-28	7.51918047117663e-05	0	1	2.61771189156812e-05
Man2b2	MAN2B2	chr4	6606864	A	G	MODERATE	0/0=75	0/1=152	1/1=73	rs2301788	PASS	0.0117	0.48,0.520	0.464257,0.535743	0.3849,0.6151	0.4841,0.5159	0.5129,0.4871	0.505,0.495	0.4243,0.5757	0.4643,0.5357	0.496666666666667	0.0698854195821631	3.47318706050694e-06	0.490128211325814	0.697447663088413	0.948472972786455	0.00220671175797002	1	0.000670325102677839	1	1	1	0.580365192346115
Golga3	GOLGA3	chr12	133393323	C	T	MODERATE	0/0=256	0/1=42	1/1=2	rs2291256	PASS	0.0204	0.929,0.071	0.941893,0.058107	0.871,0.129	0.9366,0.0634	1,0	0.9304,0.0696	0.9519,0.0481	0.9419,0.05811	0.0766666666666667	0.0706569446065353	0.00115157782707173	0.34952300623266		0.596675465439877	0.0193544690676455	1	0.156614584481755	1	NA	1	1
N4bp2	N4BP2	chr4	40121562	G	A	MODERATE	0/0=15	0/1=93	1/1=192	rs794001	PASS	0.0580	0.189,0.811	0.175319,0.824681	0.0347,0.9653	0.1542,0.8458	0.3238,0.6762	0.2376,0.7624	0.0706,0.9294	0.1753,0.8247	0.795	0.0727853818118802	1.30735416743389e-28	0.0171423979278917	9.46394855816379e-08	0.130411811801281	2.24136057510257e-15	1	4.60188666936729e-26	1	2.23349185972665e-05	1	1.18343838365416e-12
Oas3	OAS3	chr12	113386779	C	G	MODERATE	0/0=172	0/1=107	1/1=20	rs2285933	PASS	0.0202	0.736,0.264	0.719449,0.280551	0.8423,0.1577	0.621,0.379	0.5908,0.4092	0.7435,0.2565	0.8119,0.1881	0.7194,0.2806	0.245819397993311	0.0727973482709468	1.37861462572442e-05	2.92451965849724e-07	4.71507632869646e-12	0.63400441335267	0.00633621080976265	1	0.00248150632630396	0.000145933530959012	1.50410934885417e-09	1	1
Tacc3	TACC3	chr4	1729988	G	A	MODERATE	0/0=195	0/1=89	1/1=15	rs1063743	PASS	0.0190	0.789,0.211	0.830072,0.169928	0.8522,0.1478	0.804,0.196	0.8669,0.1331	0.7366,0.2634	0.8722,0.1278	0.8301,0.1699	0.198996655518395	0.0757101343225706	0.00780986929645389	0.892663533677198	0.000208705031900847	0.00346725694937752	0.000149697690536188	1	0.851275753313474	1	0.0279664742747135	1	0.0496996332580144
Lrpap1	LRPAP1	chr4	3526645	C	T	MODERATE	0/0=280	0/1=20	1/1=0	rs11549516	PASS	0.0172	0.956,0.044	0.9504792,0.0495208	0.9663,0.0337	0.9207,0.0793	0.9539,0.0461	0.9642,0.0358	0.9366,0.0634	0.9505,0.04952	0.0333333333333333	0.0790000581556945	0.968504883303863	0.000418563829429239	0.196607844263111	0.794369393140052	0.00899747919623325	1	1	0.174122553042563	1	1	1
Ncapg	NCAPG	chr4	17829990	G	C	MODERATE	0/0=236	0/1=59	1/1=5	rs3795243	PASS	0.0230	0.871,0.129	0.858826,0.141174	0.8383,0.1617	0.8833,0.1167	0.9123,0.0877	0.9095,0.0905	0.7382,0.2618	0.8588,0.1412	0.115	0.0793211264904016	0.00994856012042416	0.924105694686408	0.0600192470576173	0.112810351277067	2.56275957091628e-12	1	1	1	1	1	1.30188186202547e-09
Chfr	CHFR	chr12	133428242	G	A	MODERATE	0/0=156	0/1=108	1/1=31	rs2306541	PASS	0.0252	0.723,0.277	0.745208,0.254792	0.8075,0.1925	0.7248,0.2752	0.8048,0.1952	0.7217,0.2783	0.6391,0.3609	0.7452,0.2548	0.288135593220339	0.0800930709360947	1.08826166993481e-05	0.607366883300544	6.69769085459571e-06	0.673351247513258	0.0030699295564738	1	0.0020132840893794	1	0.00126586357151859	1	0.785901966457293
Hgfac	HGFAC	chr4	3449915	A	G	MODERATE	0/0=290	0/1=10	1/1=0	rs114303452	PASS	0.0110	0.989,0.011	0.9908147,0.0091853	1,0	0.9885,0.0115	1,0	0.9831,0.0169	0.9785,0.0215	0.9908,0.009185	0.0166666666666667	0.0815604599241804		0.428496489908497		0.971933346997688	0.502012311445129	1	NA	1	NA	1	1
Alkbh2	ALKBH2	chr12	109526189	C	T	MODERATE	0/0=288	0/1=12	1/1=0	rs33962311	PASS	0.0030	0.989991764,0.010	0.9882188,0.0117812	0.996,0.004	0.9986,0.0014	0.9743,0.0257	0.996,0.004	0.9836,0.0164	0.9882,0.01178	0.02	0.0888336604025051	0.00178860814994564	0.000810042048536408	0.448564165008165	0.00180269496429708	0.599248127659935	1	0.236096275792824	0.328877071705782	1	0.915769041862917	1
Setd1b	SETD1B	chr12	122260549	T	C	MODERATE	0/0=285	0/1=15	1/1=0	rs58801491	PASS	0.0045	0.978,0.022	0.9610623,0.0389377	0.9802,0.0198	0.9827,0.0173	0.9145,0.0855	0.9851,0.0149	0.9642,0.0358	0.9611,0.03894	0.025	0.0892576961295967	0.489237181860514	0.333913831781761	8.26536625710812e-07	0.148049272786482	0.234502488297932	1	1	1	0.000179358447779246	1	1
Fras1	FRAS1	chr4	79447763	T	C	MODERATE	0/0=234	0/1=60	1/1=6	rs34670941	PASS	0.0136	0.884,0.116	0.854633,0.145367	0.7728,0.2272	0.9135,0.0865	0.8245,0.1755	0.8907,0.1093	0.9008,0.0992	0.8546,0.1454	0.12	0.0931494484375019	9.83078793479835e-08	0.0471080869541163	0.0020029982142552	0.512812219449383	0.194627938166854	1	2.20209649739483e-05	1	0.226338798210838	1	1
Wfs1	WFS1	chr4	6302889	G	A	MODERATE	0/0=275	0/1=24	1/1=1	rs1801208	PASS	0.0068	0.943,0.057	0.9396965,0.0603035	0.9206,0.0794	0.9222,0.0778	0.9667,0.0333	0.9473,0.0527	0.9274,0.0726	0.9397,0.0603	0.0433333333333333	0.0941392329876147	0.00482661964592471	0.0102479799877517	0.276653245627679	0.40114924958649	0.0187912393194661	1	0.555061259281342	1	1	1	1
Bmp2k	BMP2K	chr4	79832706	C	G	MODERATE	0/0=248	0/1=52	1/1=0	rs12507099	PASS	0.0327	0.898,0.102	0.891174,0.108826	0.7579,0.2421	0.8228,0.1772	0.9955,0.0045	0.8986,0.1014	0.9284,0.0716	0.8912,0.1088	0.0866666666666667	0.0962919961407284	7.37691975989079e-15	2.04214396879726e-06	0	0.332021543018738	0.276721415529541	1	2.23520668724691e-12	0.000984313392960279	0	1	1
Stx18	STX18	chr4	4436517	A	T	MODERATE	0/0=264	0/1=36	1/1=0	rs33952588	PASS	0.0149	0.954,0.046	0.9548722,0.0451278	0.999,0.001	0.9712,0.0288	0.9017,0.0983	0.9543,0.0457	0.9703,0.0297	0.9549,0.04513	0.06	0.102836517562531	2.33146835171283e-14	0.0059437129470743	0.00560267686073365	0.207796927600988	0.00329154333835491	1	6.87783163755285e-12	1	0.549062332351898	1	0.829468921265437
P2rx7	P2RX7	chr12	121600253	T	C	MODERATE	0/0=53	0/1=155	1/1=92	rs208294	PASS	0.0413	0.477,0.523	0.470048,0.529952	0.5863,0.4137	0.6095,0.3905	0.3056,0.6944	0.4443,0.5557	0.5,0.5	0.47,0.53	0.565	0.103897670526092	4.12638456737113e-09	3.59139828987054e-10	3.27317734788124e-08	0.71649801454953	0.0120746205170079	1	1.00683783443856e-06	1.89266689876177e-07	8.11747982274548e-06	1	1
Spon2	SPON2	chr4	1165130	G	T	MODERATE	0/0=90	0/1=85	1/1=100	rs11247975	PASS	0.0923	0.366,0.634	0.445487,0.554513	0.3244,0.6756	0.2911,0.7089	0.7716,0.2284	0.3161,0.6839	0.3722,0.6278	0.4455,0.5545	0.518181818181818	0.103944164492911	9.48239021739168e-10	5.23468490513309e-12	0	1.0748993792584e-10	2.92591827771732e-05	1	2.36111516413053e-07	2.83719921858214e-09	0	6.14842444935805e-08	0.0106210833481139
Rest	REST	chr4	57797283	G	A	MODERATE	0/0=299	0/1=1	1/1=0	rs544207693		?	?	0.99261182,0.00738818	0.9931,0.0069	0.9986,0.0014	0.9939,0.0061	0.9841,0.0159	0.9949,0.0051	0.9926,0.007388	0.00166666666666667	0.106447036196577	0.148020908700562	0.902389124598722	0.188654685583656	0.00700393413371801	0.281549820117884	1	1	1	1	1	1
Fras1	FRAS1	chr4	79300993	G	A	MODERATE	0/0=174	0/1=107	1/1=19	rs12512164	PASS	0.0231	0.736,0.264	0.786741,0.213259	0.7827,0.2173	0.6513,0.3487	0.8805,0.1195	0.7296,0.2704	0.819,0.181	0.7867,0.2133	0.241666666666667	0.110239105186738	0.258816675100013	2.74607240835135e-05	9.71622782230952e-12	0.203914706126647	0.00369844408709552	1	1	0.0124946294579986	3.07032799184981e-09	1	0.919180913111926
Wfs1	WFS1	chr4	6303354	G	A	MODERATE	0/0=73	0/1=152	1/1=75	rs734312	PASS	0.0994	0.464,0.536	0.530751,0.469249	0.1895,0.8105	0.4524,0.5476	0.9682,0.0318	0.4374,0.5626	0.4427,0.5573	0.5308,0.4692	0.503333333333333	0.114048104035303	2.36808674261238e-38	0.111722970101077	0	0.0211375049639895	0.0368868718793156	1	8.71455921281356e-36	1	0	1	1
Nipal1	NIPAL1	chr4	48037926	A	G	MODERATE	0/0=184	0/1=93	1/1=23	rs13116684	PASS	0.0156	0.79,0.210	0.795927,0.204073	0.8363,0.1637	0.8084,0.1916	0.7738,0.2262	0.7813,0.2187	0.7904,0.2096	0.7959,0.2041	0.231666666666667	0.114929105165291	0.000761597838491834	0.0777220133634795	0.791207718785734	0.546256740791915	0.302713466166134	1	0.106623697388857	1	1	1	1
Pex1	PEX1	chr7	92132493	T	C	MODERATE	0/0=284	0/1=16	1/1=0	rs35996821	PASS	0.0138	0.973,0.027	0.9824281,0.0175719	0.996,0.004	0.9827,0.0173	0.9962,0.0038	0.9493,0.0507	0.9836,0.0164	0.9824,0.01757	0.0266666666666667	0.118655736130825	7.39304198966728e-05	0.248218183810905	7.96562543881052e-06	0.0197960173338853	0.160395065843014	1	0.0124942409625377	1	0.00149092620991897	1	1
Ptpn13	PTPN13	chr4	87690998	A	G	MODERATE	0/0=201	0/1=88	1/1=11	rs2230600	PASS	0.0332	0.823,0.177	0.841454,0.158546	0.6845,0.3155	0.7723,0.2277	0.9811,0.0189	0.841,0.159	0.864,0.136	0.8415,0.1585	0.183333333333333	0.118675484227023	6.64618481883918e-09	0.0495392740399278	0	0.207122330479264	0.0114450298993309	1	1.58179198688372e-06	1	0	1	1
Gtpbp10	GTPBP10	chr7	90014408	G	A	MODERATE	0/0=212	0/1=79	1/1=9	rs17863999	PASS	0.0106	0.814,0.186	0.8127,0.1873	0.8899,0.1101	0.7983,0.2017	0.7784,0.2216	0.8141,0.1859	0.7883,0.2117	0.8127,0.1873	0.161666666666667	0.126143264763934	0.0028809932499152	0.0633506792319047	0.00246533196009021	0.21819741079528	0.0144322725376868	1	0.3601241562394	1	0.276117179530104	1	1
Tmem214	TMEM214	chr2	27260469	G	A	MODERATE	0/0=131	0/1=138	1/1=31	rs1124649	PASS	0.0439	0.684,0.316	0.696885,0.303115	0.9345,0.0655	0.5994,0.4006	0.5522,0.4478	0.6909,0.3091	0.7229,0.2771	0.6969,0.3031	0.333333333333333	0.129169390736304	0	0.0124152378865799	2.30804444368125e-06	0.313128223301475	0.0177989142581638	1	0	1	0.000466224977623613	1	1
Spon2	SPON2	chr4	1165748	T	C	MODERATE	0/0=236	0/1=57	1/1=6	rs6836335	PASS	0.0572	0.878991745,0.121	0.86222,0.13778	0.999,0.001	0.9006,0.0994	0.7057,0.2943	0.8688,0.1312	0.8988,0.1012	0.8622,0.1378	0.115384615384615	0.130305360190258	0	0.353633597156252	1.62345168334378e-17	0.354883065338438	0.375885688555564	1	0	1	6.15288187987293e-15	1	1
Lgi2	LGI2	chr4	25032135	C	T	MODERATE	0/0=216	0/1=75	1/1=9	rs74901868	PASS	0.0282	0.846,0.154	0.820088,0.179912	0.7738,0.2262	0.7867,0.2133	0.8389,0.1611	0.8121,0.1879	0.8742,0.1258	0.8201,0.1799	0.155	0.131033160418025	0.000551362256358764	0.00722577474703902	0.734826260754652	0.0936746174825872	0.101402282677119	1	0.0788448026593032	1	1	1	1
Upk3b	UPK3B	chr7	76140186	T	C	MODERATE	0/0=198	0/1=94	1/1=8	rs12666503	PASS	-0.0098	0.814,0.186	0.790735,0.209265	0.5744,0.4256	0.7781,0.2219	0.9085,0.0915	0.8161,0.1839	0.8374,0.1626	0.7907,0.2093	0.183333333333333	0.138104438469957	2.44446597811568e-23	0.0860192044615539	9.60997659227303e-09	0.977366976932752	0.287699999177804	1	8.38451830493678e-21	1	2.5658637501369e-06	1	1
P2rx7	P2RX7	chr12	121622196	A	G	MODERATE	0/0=271	0/1=26	1/1=3	rs2230912	PASS	0.0280	0.868,0.132	0.9307109,0.0692891	0.999,0.001	0.9496,0.0504	0.9644,0.0356	0.8529,0.1471	0.8814,0.1186	0.9307,0.06929	0.0533333333333333	0.141210550005899	8.20010725988141e-13	0.81225650425765	0.0696914080703399	8.28297897143556e-09	1.58013555329904e-05	1	2.29603003276679e-10	1	1	4.65503418194678e-06	0.00590970696933841
Zfp518b	ZNF518B	chr4	10446385	C	T	MODERATE	0/0=4	0/1=1	1/1=295	rs9291410	PASS	0.0343	0.00299176400000001,0.997	0.00898600000000005,0.991014	0,1	0.00139999999999996,0.9986	0.0333,0.9667	0,1	0,1	0.008986,0.991	0.985	0.154012099926618	9.64424440572259e-05	0.00527211529756984	0.0232200354112113	9.79901111213972e-05	0.000122477709186391	1	0.0160094457134995	1	1	0.0522287292277047	0.0412749879958138
Hgfac	HGFAC	chr4	3449652	G	A	MODERATE	0/0=266	0/1=33	1/1=1	rs16844401	PASS	0.0287	0.927991733,0.072	0.9257188,0.0742812	0.9127,0.0873	0.915,0.085	0.9781,0.0219	0.9304,0.0696	0.8712,0.1288	0.9257,0.07428	0.0583333333333333	0.154765858490691	0.0345446855044073	0.0653087897911539	3.67866468140576e-05	0.376947029186424	7.12983995443438e-06	1	1	1	0.00584907684343516	1	0.00275924806236611
N4bp2	N4BP2	chr4	40122313	A	T	MODERATE	0/0=284	0/1=16	1/1=0	rs61748748	PASS	0.0144	0.979,0.021	0.9816294,0.0183706	1,0	0.9755,0.0245	0.9992,0.0008	0.9642,0.0358	0.9611,0.0389	0.9816,0.01837	0.0266666666666667	0.162322206634752		0.805267112320242	2.10861528238127e-08	0.317210455068458	0.194587358929083	1	NA	1	5.41914127571986e-06	1	1
Trafd1	TRAFD1	chr12	112583447	A	C	MODERATE	0/0=290	0/1=10	1/1=0	rs79680080	PASS	0.0129	0.984,0.016	0.9896166,0.0103834	1,0	0.9841,0.0159	0.9985,0.0015	0.9692,0.0308	0.9918,0.0082	0.9896,0.01038	0.0166666666666667	0.164240831368582		0.913395939182159	9.06577688506438e-05	0.0823014343608092	0.12437565206524	1	NA	1	0.0134173497898953	1	1
Cux1	CUX1	chr7	101921289	A	G	MODERATE	0/0=277	0/1=23	1/1=0	rs79334660	PASS	0.0184	0.973,0.027	0.9716454,0.0283546	1,0	0.9654,0.0346	0.9463,0.0537	0.9583,0.0417	0.9949,0.0051	0.9716,0.02835	0.0383333333333333	0.171666982362351		0.720405637183668	0.147760699257375	0.740402054455383	1.20174464668388e-06	1	NA	1	1	1	0.00049872402837381
Atg9b	ATG9B	chr7	150713827	G	A	MODERATE	0/0=275	0/1=25	1/1=0	rs3800789	PASS	0.0205	0.951,0.049	0.9452875,0.0547125	0.8542,0.1458	0.9568,0.0432	0.9834,0.0166	0.9732,0.0268	0.9509,0.0491	0.9453,0.05471	0.0416666666666667	0.178906106930356	6.36799821105712e-11	0.891529858571461	0.00097083131069442	0.10333604242626	0.495028339468344	1	1.68115152771908e-08	1	0.120383082526108	1	1
Dhx37	DHX37	chr12	125467158	C	T	MODERATE	0/0=131	0/1=130	1/1=39	rs11558556	PASS	0.0202	0.639,0.361	0.625998,0.374002	0.5853,0.4147	0.7493,0.2507	0.5877,0.4123	0.661,0.339	0.5961,0.4039	0.626,0.374	0.346666666666667	0.190271341287035	0.006810192401452	0.000160557820362728	0.00630704034731956	0.754017978920803	0.0231256036842326	1	0.762609856114578	0.0679159580134339	0.605475873342678	1	1
Nupl2	NUPL2	chr7	23240263	G	A	MODERATE	0/0=261	0/1=37	1/1=2	rs13243961	PASS	0.0374	0.92,0.080	0.9446885,0.0553115	0.998,0.002	0.8545,0.1455	0.997,0.003	0.8996,0.1004	0.9294,0.0706	0.9447,0.05531	0.0683333333333333	0.192474271996266	1.55431223447522e-15	9.46397562930857e-06	0	0.0285465278721362	0.863744516642802	1	4.80282480452843e-13	0.00444806854577503	0	1	1
Rest	REST	chr4	57797100	G	T	MODERATE	0/0=255	0/1=43	1/1=2	rs2227902	PASS	0.0101	0.937,0.063	0.9355032,0.0644968	0.9306,0.0694	0.9597,0.0403	0.9092,0.0908	0.9165,0.0835	0.9785,0.0215	0.9355,0.0645	0.0783333333333333	0.196982825794448	0.504692172079107	0.0034959376612147	0.368633176150602	0.714400556122648	6.81217768860876e-08	1	1	1	1	1	3.08591649293977e-05
Rest	REST	chr4	57797308	A	C	MODERATE	0/0=255	0/1=43	1/1=2	rs2227903		?	?	0.9355032,0.0644968	0.9306,0.0694	0.9597,0.0403	0.9092,0.0908	0.9165,0.0835	0.9785,0.0215	0.9355,0.0645	0.0783333333333333	0.196982825794448	0.504692172079107	0.0034959376612147	0.368633176150602	0.714400556122648	6.81217768860876e-08	1	1	1	1	1	3.08591649293977e-05
Gatc	GATC	chr12	120884291	C	T	MODERATE	0/0=270	0/1=29	1/1=1	rs17431446	PASS	0.0217	0.944,0.056	0.9594649,0.0405351	0.9911,0.0089	0.9553,0.0447	0.9992,0.0008	0.9394,0.0606	0.8967,0.1033	0.9595,0.04054	0.0516666666666667	0.197544008248432	9.97066651464706e-08	0.558531441229023	6.66133814775094e-16	0.456034718666926	0.000323179001203257	1	2.22345863276629e-05	1	2.45137243837235e-13	1	0.101801385379026
Shroom3	SHROOM3	chr4	77675925	G	A	MODERATE	0/0=284	0/1=16	1/1=0	rs61741104	PASS	0.0273	0.955,0.045	0.9632588,0.0367412	0.998,0.002	0.8905,0.1095	0.9955,0.0045	0.9513,0.0487	0.9479,0.0521	0.9633,0.03674	0.0266666666666667	0.208577389349945	5.49354525336554e-06	7.37087435751549e-09	2.2534848704181e-05	0.030183276835023	0.0149666012667136	1	0.00104377359813945	3.80337116847799e-06	0.00387599397711913	1	1
Bod1l	BOD1L1	chr4	13606576	A	T	MODERATE	0/0=24	0/1=103	1/1=173	rs1971278	PASS	0.1240	0.193,0.807	0.275759,0.724241	0.0288,0.9712	0.1542,0.8458	0.6952,0.3048	0.1918,0.8082	0.136,0.864	0.2758,0.7242	0.748333333333333	0.210738210937453	9.1424335585876e-43	1.2086464903271e-05	0	0.00466811442748479	6.39898132519984e-09	1	3.391842850236e-40	0.0056685520396341	0	1	3.01392020416913e-06
Slc30a9	SLC30A9	chr4	42020142	A	G	MODERATE	0/0=4	0/1=9	1/1=287	rs2581423	PASS	0.0093	0.020991761,0.979	0.020567,0.979433	0.004,0.996	0.0101,0.9899	0.0325,0.9675	0.0268,0.9732	0.0225,0.9775	0.02057,0.9794	0.971666666666667	0.214121173032672	3.27264876717091e-05	0.0153588532843085	0.626349706213924	0.855439984203927	0.468760659118544	1	0.00579258831789251	1	1	1	1
Ccl24	CCL24	chr7	75442723	G	A	MODERATE	0/0=282	0/1=17	1/1=1	rs11465293	PASS	0.0170	0.958,0.042	0.9576677,0.0423323	0.9444,0.0556	0.9798,0.0202	0.9614,0.0386	0.9503,0.0497	0.9581,0.0419	0.9577,0.04233	0.0316666666666667	0.214130325215111	0.0277693944760863	0.192082959606683	0.45222219895636	0.0846862983218442	0.30207183113	1	1	1	1	1	1
Tnrc18	TNRC18	chr7	5396715	T	C	MODERATE	0/0=111	0/1=139	1/1=50	rs35508364	PASS	0.2111	0.703,0.297	0.627596,0.372404	0.8403,0.1597	0.6844,0.3156	0.5061,0.4939	0.5209,0.4791	0.6421,0.3579	0.6276,0.3724	0.398333333333333	0.215105756042584	0	0.00191201279550812	9.90446050044347e-05	0.00164363274911007	0.106951148087032	1	0	0.747597003043675	0.0143322023871617	0.836609069297026	1
Sh3tc1	SH3TC1	chr4	8228731	T	C	MODERATE	0/0=5	0/1=3	1/1=292	rs1281145	PASS	0.0675	0.00900000000000001,0.991	0.030751,0.969249	0,1	0.013,0.987	0.1097,0.8903	0,1	0,1	0.03075,0.9692	0.978333333333333	0.216048719053939	2.70104568024268e-06	0.229361442331881	7.49478257233704e-11	2.76290982720611e-06	3.79437011407549e-06	1	0.000529404953327565	1	2.26342433684579e-08	0.00153065204427218	0.00151015930540205
Nup54	NUP54	chr4	77053834	T	C	MODERATE	0/0=213	0/1=78	1/1=9	rs61750814	PASS	0.0342	0.851,0.149	0.858626,0.141374	0.9722,0.0278	0.7752,0.2248	0.7844,0.2156	0.828,0.172	0.9325,0.0675	0.8586,0.1414	0.16	0.218594735977852	0	0.00333199482827209	0.00460922154883203	0.533305157673351	4.18531675983047e-09	1	0	1	0.479359041078531	1	1.98384014415964e-06
C530008M17Rik	KIAA1211	chr4	57180563	G	C	MODERATE	0/0=205	0/1=57	1/1=32	rs59615456	PASS	0.1244	0.792,0.208	0.772764,0.227236	0.7411,0.2589	0.7738,0.2262	0.8495,0.1505	0.6571,0.3429	0.82,0.18	0.7728,0.2272	0.20578231292517	0.238570613162994	0.0164363247432718	0.376710331944092	0.00282239399485751	6.34114619062577e-09	0.207592058513726	1	1	1	0.313285733429184	3.57640645151293e-06	1
Afap1	AFAP1	chr4	7802227	G	C	MODERATE	0/0=225	0/1=66	1/1=9	rs28406288	PASS	0.0262	0.856,0.144	0.876797,0.123203	0.9911,0.0089	0.7752,0.2248	0.8442,0.1558	0.8529,0.1471	0.8998,0.1002	0.8768,0.1232	0.14	0.239736651527328	0	9.09025066024895e-05	0.369836220569708	0.695394279538991	0.0162725044911312	1	0	0.0394516878654804	1	1	1
Reln	RELN	chr7	103251161	G	C	MODERATE	0/0=241	0/1=55	1/1=4	rs362691	PASS	0.0122	0.883991763,0.116	0.878994,0.121006	0.8542,0.1458	0.879,0.121	0.9342,0.0658	0.8946,0.1054	0.8139,0.1861	0.879,0.121	0.105	0.253020729792241	0.0188533580861214	0.365700505942331	0.00298884558474799	0.979839896667678	1.5720528029006e-05	1	1	1	0.325784168737531	1	0.00589519801087725
Fam185a	FAM185A	chr7	102389697	C	T	MODERATE	0/0=263	0/1=35	1/1=2	rs141352868	PASS	0.0141	0.912,0.088	0.9219249,0.0780751	0.9077,0.0923	0.9193,0.0807	0.9977,0.0023	0.9185,0.0815	0.8395,0.1605	0.9219,0.07808	0.065	0.255340153866016	0.0537906128121688	0.280236536824136	0	0.225522068308323	2.34980324125662e-08	1	1	1	0	1	1.09265850718433e-05
C530008M17Rik	KIAA1211	chr4	57181629	C	T	MODERATE	0/0=184	0/1=90	1/1=20	rs61750793	PASS	0.0495	0.76192515,0.238	0.798722,0.201278	0.746,0.254	0.804,0.196	0.8585,0.1415	0.7177,0.2823	0.8517,0.1483	0.7987,0.2013	0.22108843537415	0.258877480855594	0.138579088152702	0.269687111780682	1.59472600496091e-05	0.00716193386662107	0.000246608226114109	1	1	1	0.00288645406897925	1	0.0794078488087431
Acox3	ACOX3	chr4	8390948	C	T	MODERATE	0/0=282	0/1=18	1/1=0	rs13434465	PASS	0.0174	0.965,0.035	0.9606629,0.0393371	1,0	0.9741,0.0259	0.9251,0.0749	0.9612,0.0388	0.9581,0.0419	0.9607,0.03934	0.03	0.260329289862233		0.654610308015632	0.000136389360017586	0.356621948331316	0.226351184568304	1	NA	1	0.0186853423224093	1	1
Fam114a1	FAM114A1	chr4	38933859	G	A	MODERATE	0/0=231	0/1=64	1/1=5	rs17429619	PASS	0.0321	0.836,0.164	0.891174,0.108826	0.9236,0.0764	0.7954,0.2046	0.9493,0.0507	0.8449,0.1551	0.8947,0.1053	0.8912,0.1088	0.123333333333333	0.283883756984001	0.00180661312054853	9.25439551215975e-05	1.5241028217261e-08	0.0787454656509857	0.270456089311697	1	0.236666318791857	0.0400715325676517	3.9474263082706e-06	1	1
Gtpbp10	GTPBP10	chr7	89983808	T	G	MODERATE	0/0=16	0/1=77	1/1=207	rs42663	PASS	0.0139	0.191,0.809	0.19988,0.80012	0.1101,0.8899	0.1988,0.8012	0.2723,0.7277	0.1839,0.8161	0.2117,0.7883	0.1999,0.8001	0.818333333333333	0.290006038467246	5.36886642862731e-05	0.434153378492523	1.8118783686516e-05	0.910856039649162	0.147861094614987	1	0.0091807615929527	1	0.00322514349619985	1	1
Akap9	AKAP9	chr7	91630620	G	T	MODERATE	0/0=112	0/1=140	1/1=48	rs6964587	PASS	0.0271	0.618,0.382	0.627796,0.372204	0.8383,0.1617	0.6427,0.3573	0.4977,0.5023	0.6133,0.3867	0.591,0.409	0.6278,0.3722	0.393333333333333	0.312231372948631	0	0.181588093192932	9.15489698100474e-06	0.791968034388984	0.53795048702919	1	0	1	0.00170281083846688	1	1
Htt	HTT	chr4	3215835	T	C	MODERATE	0/0=105	0/1=138	1/1=57	rs362331	PASS	0.0246	0.573,0.427	0.558706,0.441294	0.6141,0.3859	0.5706,0.4294	0.4138,0.5862	0.5666,0.4334	0.681,0.319	0.5587,0.4413	0.42	0.320602540806567	0.176787961614058	0.733028035370404	1.30004872100986e-11	0.599602275393023	4.82179841949648e-05	1	1	1	4.08215298397096e-09	1	0.0169727304366276
Hgfac	HGFAC	chr4	3451109	G	A	MODERATE	0/0=255	0/1=43	1/1=2	rs2498323	PASS	0.0183	0.926,0.074	0.932508,0.067492	0.9524,0.0476	0.9107,0.0893	0.9085,0.0915	0.9185,0.0815	0.9744,0.0256	0.9325,0.06749	0.0783333333333333	0.320983067017649	0.0114635672785268	0.478704141352029	0.343563532693276	0.821293234610719	1.1052367892006e-06	1	1	1	1	1	0.000461841046438393
Slc2a9	SLC2A9	chr4	9922167	C	T	MODERATE	0/0=169	0/1=115	1/1=16	rs16890979	PASS	0.0558	0.761,0.239	0.736222,0.263778	0.9871,0.0129	0.6182,0.3818	0.5197,0.4803	0.7863,0.2137	0.8027,0.1973	0.7362,0.2638	0.245	0.322772764371739	0	1.38022190085767e-07	2.23354010887725e-22	0.146438207821374	0.0252627899964373	1	0	6.94251616131408e-05	8.82248343006514e-20	1	1
Nop14	NOP14	chr4	2951804	A	G	MODERATE	0/0=92	0/1=159	1/1=49	rs2515960	PASS	0.0573	0.593,0.407	0.592452,0.407548	0.8085,0.1915	0.585,0.415	0.3185,0.6815	0.5567,0.4433	0.7822,0.2178	0.5925,0.4075	0.428333333333333	0.327917385123981	0	0.628088678350212	7.83867436846436e-26	0.558640257610159	0	1	0	1	3.13546974738574e-23	1	0
Man2b2	MAN2B2	chr4	6616056	C	T	MODERATE	0/0=280	0/1=19	1/1=1	rs61729241	PASS	0.0471	0.94498353,0.055	0.9566693,0.0433307	0.998,0.002	0.8718,0.1282	0.9675,0.0325	0.9503,0.0497	0.9663,0.0337	0.9567,0.04333	0.035	0.338783471415842	7.12072167896594e-08	2.02979161886412e-09	0.777065183220598	0.165626689037257	0.890282072516952	1	1.61640382112527e-05	1.06158101666593e-06	1	1	1
Acacb	ACACB	chr12	109696838	G	A	MODERATE	0/0=28	0/1=90	1/1=182	rs2075260	PASS	0.0318	0.211,0.789	0.261182,0.738818	0.2738,0.7262	0.1556,0.8444	0.3064,0.6936	0.166,0.834	0.3599,0.6401	0.2612,0.7388	0.756666666666667	0.345802540307011	0.179269516578956	7.41885362082383e-05	0.00461016330120456	0.000153822250334438	1.32001996400177e-06	1	1	0.0326429559316248	0.479359041078531	0.0813719704269177	0.000545168245132731
Dhx37	DHX37	chr12	125461976	C	T	MODERATE	0/0=288	0/1=12	1/1=0	rs33931896	PASS	0.0135	0.973,0.027	0.985024,0.014976	0.999,0.001	0.9755,0.0245	1,0	0.9702,0.0298	0.9724,0.0276	0.985,0.01498	0.02	0.34670067658531	3.89601166184139e-05	0.585518446620623		0.233733930508461	0.345138976649867	1	0.00685698052484085	1	NA	1	1
Sowahb	SOWAHB	chr4	77817874	G	T	MODERATE	0/0=233	0/1=61	1/1=6	rs2703130	PASS	0.0198	0.872,0.128	0.890974,0.109026	0.9147,0.0853	0.9265,0.0735	0.8563,0.1437	0.8479,0.1521	0.9325,0.0675	0.891,0.109	0.121666666666667	0.350434644724433	0.0181337030404245	0.00333234543198113	0.192756458881763	0.0897622883209654	0.00022844215936213	1	1	1	1	1	0.073786817473968
Kdr	KDR	chr4	55972974	T	A	MODERATE	0/0=184	0/1=95	1/1=21	rs1870377	PASS	0.0529	0.781,0.219	0.788139,0.211861	0.5347,0.4653	0.8689,0.1311	0.91,0.09	0.7654,0.2346	0.8507,0.1493	0.7881,0.2119	0.228333333333333	0.35221999131671	2.46193810126589e-21	4.68774106421321e-06	2.22044604925031e-16	0.773573814514058	7.11014500041074e-05	1	8.34597016329137e-19	0.00223136474656549	8.34887714518117e-14	1	0.0243166959014047
Htt	HTT	chr4	3148653	T	G	MODERATE	0/0=283	0/1=17	1/1=0	rs1143646	PASS	0.0182	0.96,0.040	0.9776358,0.0223642	1,0	0.9769,0.0231	0.9977,0.0023	0.9513,0.0487	0.955,0.045	0.9776,0.02236	0.0283333333333333	0.35669823899651		0.551689320221976	1.924857806479e-07	0.046688670018989	0.0954992700951469	1	NA	1	4.4271729549017e-05	1	1
Wscd2	WSCD2	chr12	108618630	C	T	MODERATE	0/0=179	0/1=98	1/1=23	rs3764002	PASS	0.0641	0.731,0.269	0.743011,0.256989	0.4524,0.5476	0.8343,0.1657	0.9856,0.0144	0.7406,0.2594	0.6524,0.3476	0.743,0.257	0.24	0.367033785568861	2.18357678096116e-33	0.000864886843077839	0	0.386437996539695	6.80237948300282e-06	1	7.92638371488901e-31	0.350279171446525	0	1	0.0026529279983711
Acacb	ACACB	chr12	109684125	G	A	MODERATE	0/0=269	0/1=29	1/1=2	rs61752535	PASS	0.0220	0.948,0.052	0.9532748,0.0467252	1,0	0.9568,0.0432	0.9009,0.0991	0.9404,0.0596	0.9867,0.0133	0.9533,0.04673	0.055	0.368384896679734		0.325257096795602	0.00134250749876623	0.702543655299372	1.75635877641689e-06	1	NA	1	0.159195876923714	1	0.000714838022001674
Kntc1	KNTC1	chr12	123030788	G	T	MODERATE	0/0=229	0/1=69	1/1=2	rs7968222	PASS	0.0318	0.882,0.118	0.865815,0.134185	0.994,0.006	0.9265,0.0735	0.6989,0.3011	0.8986,0.1014	0.8824,0.1176	0.8658,0.1342	0.121666666666667	0.393246043987787	0	0.00333234543198113	2.36247672335777e-17	0.207343752040532	0.808727198151721	1	0	1	8.93016201429237e-15	1	1
Lrrc8c	LRRC8C	chr1	90178743	A	G	MODERATE	0/0=5	0/1=1	1/1=294	rs474536	PASS	0.0389	0.005,0.995	0.013978,0.986022	0,1	0.0101,0.9899	0.0477,0.9523	0,1	0,1	0.01398,0.986	0.981666666666667	0.398127766114388	1.60605331291636e-05	0.207403264017923	0.00193861779334448	1.63732378147565e-05	2.14516826008563e-05	1	0.00287483543012028	1	0.223293472393442	0.00893978784685705	0.00791567087971598
Atraid	ATRAID	chr2	27435250	A	G	MODERATE	0/0=19	0/1=13	1/1=268	rs1275533	PASS	0.2856	0.047,0.953	0.095647,0.904353	0,1	0.0504,0.9496	0.3238,0.6762	0.0139,0.9861	0.002,0.998	0.09565,0.9044	0.915	0.399524654491699	5.1183667136534e-21	0.0126984165191877	0	2.64516548885572e-12	6.25192825189226e-19	1	1.7248895825012e-18	1	0	1.52890565255861e-09	3.3885451125256e-16
Bod1l	BOD1L1	chr4	13615174	G	A	MODERATE	0/0=232	0/1=61	1/1=7	rs2035820	PASS	0.0280	0.855,0.145	0.86262,0.13738	0.997,0.003	0.7853,0.2147	0.8442,0.1558	0.8499,0.1501	0.817,0.183	0.8626,0.1374	0.125	0.40324453908648	0	2.10904526813953e-05	0.0765515467661508	0.161707559716881	0.00233787057618737	1	0	0.00970160823344184	1	1	0.605508479232529
Tyw1	TYW1	chr7	66703328	G	A	MODERATE	0/0=165	0/1=130	1/1=5	rs139935023	PASS	0.0281	0.77,0.230	0.751198,0.248802	0.9266,0.0734	0.7781,0.2219	0.6384,0.3616	0.7634,0.2366	0.6912,0.3088	0.7512,0.2488	0.233333333333333	0.406489290877131	0	0.624511900326658	2.42156296992018e-08	0.881333318844685	0.00119197061010554	1	0	1	6.12655431389806e-06	1	0.326599947168918
Bod1l	BOD1L1	chr4	13604418	G	C	MODERATE	0/0=231	0/1=62	1/1=7	rs17745712	PASS	0.0273	0.854,0.146	0.861222,0.138778	0.997,0.003	0.7867,0.2133	0.8381,0.1619	0.8499,0.1501	0.817,0.183	0.8612,0.1388	0.126666666666667	0.415576171606178	0	4.00113663190338e-05	0.0455434769415147	0.192225060997896	0.003163105727032	1	0	0.0179651034772462	1	1	0.803428854666128
Tnrc18	TNRC18	chr7	5391702	C	G	MODERATE	0/0=210	0/1=74	1/1=16	rs3801048	PASS	0.0201	0.818,0.182	0.810304,0.189696	0.9375,0.0625	0.8156,0.1844	0.7474,0.2526	0.7853,0.2147	0.7863,0.2137	0.8103,0.1897	0.176666666666667	0.440447092093241	5.21360732363974e-13	0.718509133632323	0.000240905160676571	0.065526242637741	0.07399697273257	1	1.47545087259005e-10	1	0.0317994812093074	1	1
Tnip2	TNIP2	chr4	2744087	G	A	MODERATE	0/0=130	0/1=125	1/1=45	rs2269495	PASS	0.0530	0.576,0.424	0.657149,0.342851	0.6121,0.3879	0.4337,0.5663	0.9349,0.0651	0.5835,0.4165	0.5624,0.4376	0.6571,0.3429	0.358333333333333	0.450759917595305	0.236705613975296	7.72979889428867e-14	0	0.0210559081991882	0.00186542190432206	1	1	4.25138939185877e-11	0	1	0.492471382741024
Phtf2	PHTF2	chr7	77552127	G	A	MODERATE	0/0=52	0/1=143	1/1=104	rs848486	PASS	0.1930	0.46598195,0.534	0.397165,0.602835	0.2192,0.7808	0.3141,0.6859	0.5651,0.4349	0.4473,0.5527	0.3609,0.6391	0.3972,0.6028	0.58695652173913	0.453560458571382	1.40128097785113e-16	0.000220195719360341	6.62389032513033e-10	0.180775881800741	0.0385717314230063	1	4.41403508023106e-14	0.0927023978507036	1.92755208461293e-07	1	1
Kit	KIT	chr4	55593464	A	C	MODERATE	0/0=267	0/1=32	1/1=1	rs3822214	PASS	0.0112	0.921,0.079	0.9355032,0.0644968	0.9474,0.0526	0.9438,0.0562	0.9493,0.0507	0.9215,0.0785	0.9131,0.0869	0.9355,0.0645	0.0566666666666667	0.457857569388914	0.727397502759057	0.971056771803889	0.587015504963976	0.0978844411354297	0.0272427968106775	1	1	1	1	1	1
Tnip2	TNIP2	chr4	2746567	C	T	MODERATE	0/0=290	0/1=10	1/1=0	rs116412781	PASS	0.0132	0.976991764,0.023	0.9790335,0.0209665	0.9871,0.0129	0.9769,0.0231	0.9992,0.0008	0.9751,0.0249	0.9489,0.0511	0.979,0.02097	0.0166666666666667	0.482505611112054	0.538439996195943	0.41109443058438	2.0272952880207e-05	0.274635403202159	0.00051551226912886	1	1	1	0.00358831265979664	1	0.155169193007787
Sdad1	SDAD1	chr4	76881233	G	T	MODERATE	0/0=249	0/1=50	1/1=1	rs34627298	PASS	0.0226	0.896,0.104	0.9045527,0.0954473	0.877,0.123	0.8934,0.1066	0.9841,0.0159	0.9115,0.0885	0.8262,0.1738	0.9046,0.09545	0.0866666666666667	0.487187157785205	0.0240041554289705	0.227733374506504	5.48450174164827e-14	0.900065120448624	1.34648363808853e-06	1	1	1	1.94699811828514e-11	1	0.000554751258892474
Pom121	POM121	chr7	72413104	G	A	MODERATE	0/0=295	0/1=4	1/1=1	rs202144776	PASS	-0.1056	0.9990106,9.894e-04	0.99261182,0.00738818	1,0	0.9885,0.0115	0.9864,0.0136	0.9891,0.0109	1,0	0.9926,0.007388	0.01	0.488254516242919		0.794649817153839	0.509976345532145	0.864488204170977		1	NA	1	1	1	NA
Acacb	ACACB	chr12	109692053	C	T	MODERATE	0/0=252	0/1=46	1/1=2	rs17848835	PASS	0.0253	0.91,0.090	0.9243211,0.0756789	0.9812,0.0188	0.9294,0.0706	0.8812,0.1188	0.8966,0.1034	0.9489,0.0511	0.9243,0.07568	0.0833333333333333	0.505019868995054	6.49748477243861e-10	0.390147208697522	0.0201296169831607	0.18645022578018	0.0107224193188387	1	1.65685861697185e-07	1	1	1	1
Pmpcb	PMPCB	chr7	102952123	G	T	MODERATE	0/0=256	0/1=40	1/1=4	rs3087615	PASS	0.0279	0.909,0.091	0.9273163,0.0726837	0.9484,0.0516	0.8804,0.1196	0.9879,0.0121	0.9185,0.0815	0.8661,0.1339	0.9273,0.07268	0.08	0.516265512178295	0.0225747671151408	0.018523317190105	1.48769885299771e-14	0.915090087397114	0.00104569287649898	1	1	1	5.34083888226178e-12	1	0.291748312543215
Nudt1	NUDT1	chr7	2289586	G	A	MODERATE	0/0=290	0/1=10	1/1=0	rs4866	PASS	0.0240	0.979,0.021	0.9794329,0.0205671	0.9633,0.0367	0.9928,0.0072	0.9811,0.0189	0.9821,0.0179	0.9816,0.0184	0.9794,0.02057	0.0166666666666667	0.520521340746488	0.0210747163284787	0.112589177504883	0.734322389324638	0.855066280253932	0.800109778266914	1	1	1	1	1	1
Prr14l	PRR14L	chr22	32113269	C	A	MODERATE	0/0=284	0/1=15	1/1=1	rs112531886	PASS	0.0213	0.964,0.036	0.966853,0.033147	0.9732,0.0268	0.9827,0.0173	0.9985,0.0015	0.9612,0.0388	0.9121,0.0879	0.9669,0.03315	0.0283333333333333	0.530569663552783	0.855385157342756	0.181214383343265	3.54019582538001e-08	0.268816647415609	3.30206142567455e-06	1	1	1	8.74428368868863e-06	1	0.00132412663169549
Tnrc18	TNRC18	chr7	5353344	G	A	MODERATE	0/0=254	0/1=41	1/1=4	rs12532973	PASS	0.0202	0.899,0.101	0.9103435,0.0896565	0.9395,0.0605	0.8242,0.1758	0.9395,0.0605	0.8956,0.1044	0.9172,0.0828	0.9103,0.08966	0.0819397993311037	0.530722265319888	0.100067030696367	6.90362965775908e-07	0.0822285058737982	0.139851382593353	0.951965597804029	1	1	0.000338968216195971	1	1	1
Klhl5	KLHL5	chr4	39064162	A	C	MODERATE	0/0=21	0/1=109	1/1=170	rs2711941	PASS	0.0102	0.2498929,0.750	0.263578,0.736422	0.1726,0.8274	0.2118,0.7882	0.3896,0.6104	0.2535,0.7465	0.2342,0.7658	0.2636,0.7364	0.748333333333333	0.530795819582822	0.000134245878306245	0.0893879265208448	3.89946097634208e-09	0.934824558956966	0.430862696765636	1	0.0217478322856117	1	1.0567539245887e-06	1	1
Stard13	STARD13	chr13	33704065	T	C	MODERATE	0/0=199	0/1=79	1/1=22	rs3742321	PASS	0.0257	0.763,0.237	0.783946,0.216054	0.7877,0.2123	0.6657,0.3343	0.8941,0.1059	0.7913,0.2087	0.7076,0.2924	0.7839,0.2161	0.205	0.533307578926859	0.727957169618012	2.00975511071322e-07	4.68801775177496e-09	0.859552386604777	0.000119874891827698	1	1	0.000100688731046732	1.26576479297924e-06	1	0.0405177134377619
Ap5z1	AP5Z1	chr7	4825307	T	A	MODERATE	0/0=265	0/1=31	1/1=4	rs11772411	PASS	-0.0028	0.942,0.058	0.9283147,0.0716853	0.9494,0.0506	0.9683,0.0317	0.9909,0.0091	0.9324,0.0676	0.7894,0.2106	0.9283,0.07169	0.065	0.54673495891384	0.224401204685222	0.00482457690040117	1.62114766055765e-12	0.839819934494594	8.95443162148449e-15	1	1	1	5.34978727984024e-10	1	4.71898546452233e-12
Psmd9	PSMD9	chr12	122326812	T	C	MODERATE	0/0=12	0/1=70	1/1=218	rs2230681	PASS	0.0905	0.175,0.825	0.166334,0.833666	0.125,0.875	0.2651,0.7349	0.1868,0.8132	0.1272,0.8728	0.1513,0.8487	0.1663,0.8337	0.843333333333333	0.546885567119459	0.0739237641192921	2.17789513534683e-06	0.109045713549416	0.0978734162585351	0.773944582653086	1	1	0.00104538966496648	1	1	1
Ncor2	NCOR2	chr12	124826462	C	T	MODERATE	0/0=214	0/1=81	1/1=5	rs2229840	PASS	0.0164	0.831,0.169	0.839058,0.160942	0.8929,0.1071	0.7363,0.2637	0.888,0.112	0.8449,0.1551	0.7843,0.2157	0.8391,0.1609	0.151666666666667	0.558064625888805	0.00866671030315724	8.69218358281956e-07	0.0146158857593879	0.853625635888711	0.00169485902414529	1	0.936004712740982	0.000424178558841595	1	1	0.455719588442609
Fras1	FRAS1	chr4	79443850	G	A	MODERATE	0/0=72	0/1=157	1/1=71	rs931606	PASS	0.0125	0.481,0.519	0.489018,0.510982	0.5446,0.4554	0.5504,0.4496	0.4992,0.5008	0.4523,0.5477	0.4121,0.5879	0.489,0.511	0.498333333333333	0.558091776691614	0.0953141478516937	0.0799246083333793	0.920169535582321	0.0551884412993511	0.000511675515018495	1	1	1	1	1	0.154526005535586
Tnrc18	TNRC18	chr7	5410425	G	C	MODERATE	0/0=151	0/1=98	1/1=50	rs12671708	PASS	0.0731	0.58197502,0.418	0.656949,0.343051	0.5764,0.4236	0.513,0.487	0.941,0.059	0.5825,0.4175	0.5348,0.4652	0.6569,0.3431	0.331103678929766	0.560434926179723	0.000237474080269279	1.41997734651811e-08	0	0.000585894233802021	1.57150599882476e-07	1	0.0356211120403919	7.27028401417272e-06	0	0.301735530408041	6.8989113348407e-05
Depdc5	DEPDC5	chr22	32217539	C	T	MODERATE	0/0=284	0/1=15	1/1=1	rs16989528	PASS	0.0195	0.964,0.036	0.9672524,0.0327476	0.9772,0.0228	0.9827,0.0173	0.997,0.003	0.9592,0.0408	0.9141,0.0859	0.9673,0.03275	0.0283333333333333	0.563153283695806	0.490716806242065	0.181214383343265	7.2483270607826e-07	0.195354060519173	5.7543722414614e-06	1	1	1	0.000158738362631139	1	0.00227297703537725
P2rx7	P2RX7	chr12	121605355	G	A	MODERATE	0/0=172	0/1=109	1/1=19	rs7958311	PASS	0.0334	0.755991764,0.244	0.744209,0.255791	0.6042,0.3958	0.7032,0.2968	0.7292,0.2708	0.7704,0.2296	0.911,0.089	0.7442,0.2558	0.245	0.566406588158349	6.5799978792132e-10	0.0369508776357663	0.233711680058834	0.481574827252637	0	1	1.67131946132015e-07	1	1	1	0
Man2b2	MAN2B2	chr4	6594947	A	C	MODERATE	0/0=105	0/1=137	1/1=58	rs2301796	PASS	0.0364	0.53497529,0.465	0.566094,0.433906	0.3859,0.6141	0.5159,0.4841	0.8238,0.1762	0.5457,0.4543	0.4601,0.5399	0.5661,0.4339	0.421666666666667	0.567430815109795	6.84150037866192e-14	0.0245126741772942	0	0.202710639643318	5.11054501859693e-06	1	1.98403510981196e-11	1	0	1	0.00202377582736438
Prkrip1	PRKRIP1	chr7	102036877	T	G	MODERATE	0/0=273	0/1=24	1/1=1	rs6951185	PASS	0.0049	0.948,0.052	0.9510783,0.0489217	0.998,0.002	0.9524,0.0476	0.9092,0.0908	0.9314,0.0686	0.9785,0.0215	0.9511,0.04892	0.0436241610738255	0.568737058636189	7.78505038212529e-10	0.733341940427143	0.00031197410961215	0.0407913469405381	0.012392631827375	1	1.95404764591345e-07	1	0.040464725968683	1	1
Spon2	SPON2	chr4	1165741	A	G	MODERATE	0/0=12	0/1=4	1/1=284	rs922697	PASS	0.1386	0.014,0.986	0.051717,0.948283	0,1	0.0202,0.9798	0.1831,0.8169	0.003,0.997	0,1	0.05172,0.9483	0.953333333333333	0.59575703672845	4.54597192403371e-12	0.00739399728881573	1.55431223447522e-15	7.69477503370722e-10	9.32951172816332e-12	1	1.24559630718524e-09	1	5.68878277817931e-13	4.37832699417941e-07	4.70207391099431e-09
Golga3	GOLGA3	chr12	133354313	T	C	MODERATE	0/0=283	0/1=17	1/1=0	rs148310828	PASS	0.0196	0.969,0.031	0.9752396,0.0247604	1,0	0.9755,0.0245	0.9977,0.0023	0.9612,0.0388	0.9335,0.0665	0.9752,0.02476	0.0283333333333333	0.597314876038891		0.667276835125422	1.924857806479e-07	0.268816647415609	0.000915582258093542	1	NA	1	4.4271729549017e-05	1	0.257278614524285
Ddx51	DDX51	chr12	132626668	T	C	MODERATE	0/0=97	0/1=87	1/1=116	rs1133690	PASS	0.0996	0.38,0.620	0.457668,0.542332	0.247,0.753	0.3228,0.6772	0.8011,0.1989	0.3042,0.6958	0.4642,0.5358	0.4577,0.5423	0.531666666666667	0.620292869235962	6.74085599113801e-20	8.70995220836894e-08	0	3.90988312762144e-11	0.873048704992431	1	2.24470504504896e-17	4.38981591301795e-05	0	2.24427291525471e-08	1
Uspl1	USPL1	chr13	31221106	C	T	MODERATE	0/0=278	0/1=22	1/1=0	rs3742303	PASS	0.0299	0.96,0.040	0.9592652,0.0407348	0.9415,0.0585	0.9755,0.0245	0.9985,0.0015	0.9672,0.0328	0.9049,0.0951	0.9593,0.04073	0.0366666666666667	0.632059839620229	0.0528224893201395	0.201775775252188	1.2288570161445e-10	0.680192088805686	1.45856329878235e-05	1	1	1	3.69885961859494e-08	1	0.00548419800342164
Rbm47	RBM47	chr4	40428010	T	C	MODERATE	0/0=44	0/1=91	1/1=165	rs278981	PASS	0.0196	0.255,0.745	0.307708,0.692292	0.4216,0.5784	0.2233,0.7767	0.3275,0.6725	0.2157,0.7843	0.318,0.682	0.3077,0.6923	0.701666666666667	0.637935516441944	7.95648671836346e-07	0.00209826789606988	0.20340966687435	0.000201793959100964	0.412429217463756	1	0.000164699275070124	0.814127943675114	1	0.105941828528006	1
Hgfac	HGFAC	chr4	3446091	G	T	MODERATE	0/0=231	0/1=60	1/1=8	rs3748034	PASS	0.0280	0.861,0.139	0.866214,0.133786	0.6915,0.3085	0.8876,0.1124	0.9841,0.0159	0.8638,0.1362	0.8742,0.1258	0.8662,0.1338	0.127090301003344	0.648652075050272	2.06829845300901e-16	0.416471961032839	0	0.603160177603454	0.940351389012018	1	6.4737741579182e-14	1	0	1	1
Ptcd1	ATP5J2-PTCD1	chr7	99032517	G	A	MODERATE	0/0=272	0/1=28	1/1=0	rs34943973	PASS	0.0113	0.953,0.047	0.9572684,0.0427316	0.9673,0.0327	0.9481,0.0519	0.9455,0.0545	0.9692,0.0308	0.9571,0.0429	0.9573,0.04273	0.0466666666666667	0.653964816999067	0.156108101657173	0.665079488503221	0.473760328428815	0.101971735065263	0.724173158374186	1	1	1	1	1	1
Oas1a	OAS1	chr12	113357193	G	A	HIGH	0/0=43	0/1=139	1/1=117	rs10774671	PASS	0.0584	0.335,0.665	0.385583,0.614417	0.255,0.745	0.2738,0.7262	0.6399,0.3601	0.3519,0.6481	0.2904,0.7096	0.3856,0.6144	0.623745819397993	0.657619367004183	2.96802242490709e-07	8.40861423205624e-05	0	0.326087902186075	0.000404937908149922	1	6.3218877650521e-05	0.0367456441940858	0	1	0.125125813618326
Oas1g	OAS1	chr12	113357193	G	A	HIGH	0/0=43	0/1=139	1/1=117	rs10774671	PASS	0.0584	0.335,0.665	0.385583,0.614417	0.255,0.745	0.2738,0.7262	0.6399,0.3601	0.3519,0.6481	0.2904,0.7096	0.3856,0.6144	0.623745819397993	0.657619367004183	2.96802242490709e-07	8.40861423205624e-05	0	0.326087902186075	0.000404937908149922	1	6.3218877650521e-05	0.0367456441940858	0	1	0.125125813618326
Bod1l	BOD1L1	chr4	13604182	T	C	MODERATE	0/0=231	0/1=62	1/1=7	rs17745676	PASS	0.0293	0.856,0.144	0.867212,0.132788	0.997,0.003	0.7911,0.2089	0.8585,0.1415	0.8499,0.1501	0.817,0.183	0.8672,0.1328	0.126666666666667	0.675636521955766	0	8.8527128055703e-05	0.380637582975455	0.192225060997896	0.003163105727032	1	0	0.0385093007042308	1	1	0.803428854666128
Psmd9	PSMD9	chr12	122353796	A	G	MODERATE	0/0=151	0/1=122	1/1=27	rs14259	PASS	0.0382	0.682991762,0.317	0.714657,0.285343	0.5188,0.4812	0.6398,0.3602	0.9546,0.0454	0.6869,0.3131	0.6738,0.3262	0.7147,0.2853	0.293333333333333	0.682385337737921	1.31269471689817e-13	0.010693980462318	0	0.405533709977559	0.171957657511396	1	3.76743383749775e-11	1	0	1	1
Atraid	ATRAID	chr2	27439751	G	T	MODERATE	0/0=267	0/1=30	1/1=3	rs7437	PASS	0.0175	0.948,0.052	0.9438898,0.0561102	0.999,0.001	0.9611,0.0389	0.8918,0.1082	0.9493,0.0507	0.9397,0.0603	0.9439,0.05611	0.06	0.696618866191927	2.33146835171283e-14	0.0786112678009512	0.000754522759047825	0.425745568468614	0.980593751904148	1	6.87783163755285e-12	1	0.0965789131581216	1	1
Paxip1	PAXIP1	chr7	154738409	T	C	MODERATE	0/0=188	0/1=87	1/1=25	rs3501	PASS	0.0388	0.721991728,0.278	0.764577,0.235423	0.7917,0.2083	0.6182,0.3818	0.9274,0.0726	0.6988,0.3012	0.6881,0.3119	0.7646,0.2354	0.228333333333333	0.698578687504029	0.344921834028594	2.69643990045617e-09	0	0.00153825763891543	0.000332513111882261	1	1	1.39945230833675e-06	0	0.784511395846869	0.10440911713103
Fras1	FRAS1	chr4	79205699	T	A	MODERATE	0/0=145	0/1=122	1/1=33	rs12504081	PASS	0.0136	0.651,0.349	0.678914,0.321086	0.623,0.377	0.5821,0.4179	0.8275,0.1725	0.6272,0.3728	0.6575,0.3425	0.6789,0.3211	0.313333333333333	0.700517984858365	0.00978727277466006	0.000101723123546812	3.73123754116023e-12	0.0156869869247787	0.232143257858526	1	1	0.0435374968780355	1.20892096333591e-09	1	1
Kmt2c	KMT2C	chr7	151945060	G	A	MODERATE	0/0=300	0/1=0	1/1=0	rs200598064	VQSRTrancheSNP99.60to99.80	-0.0004	0.99994235,5.765e-05	0.999800319,0.000199681	0.999,0.001	1,0	1,0	1,0	1,0	0.9998,0.0001997	0	0.729218976424431	0.438434465496931					1	1	NA	NA	NA	NA
Oas3	OAS3	chr12	113388598	G	A	MODERATE	0/0=292	0/1=8	1/1=0	rs115666428	PASS	0.0178	0.995003,4.997e-03	0.9882188,0.0117812	1,0	0.9957,0.0043	0.9599,0.0401	0.997,0.003	1,0	0.9882,0.01178	0.0133333333333333	0.740885860553566		0.0773415438627592	0.00192494372752967	0.0152268891495215		1	NA	1	0.223293472393442	1	NA
Chfr	CHFR	chr12	133423662	C	T	MODERATE	0/0=188	0/1=101	1/1=11	rs2306536	PASS	0.0255	0.814,0.186	0.800319,0.199681	0.9335,0.0665	0.8573,0.1427	0.7247,0.2753	0.7942,0.2058	0.7311,0.2689	0.8003,0.1997	0.205	0.758341444700082	0	0.00303451121357212	0.00102494613266126	0.969382373218977	0.00414850437054968	1	0	1	0.124790678667392	1	1
Nop14	NOP14	chr4	2943361	T	C	MODERATE	0/0=101	0/1=150	1/1=48	rs1054090	PASS	0.0564	0.604,0.396	0.594848,0.405152	0.8095,0.1905	0.5893,0.4107	0.3192,0.6808	0.5646,0.4354	0.7812,0.2188	0.5948,0.4052	0.411371237458194	0.769727943878006	0	0.980492941763804	7.53168341822316e-29	0.34673753460449	4.44089209850063e-16	1	0	1	3.05033178438038e-26	1	2.37143638059934e-13
Upk3b	UPK3B	chr7	76144483	A	G	MODERATE	0/0=133	0/1=126	1/1=41	rs1636632	PASS	0.0810	0.657991656,0.342	0.659145,0.340855	0.5575,0.4425	0.6153,0.3847	0.789,0.211	0.5964,0.4036	0.684,0.316	0.6591,0.3409	0.346666666666667	0.77665080546087	0.000154613784238378	0.156929823213314	2.34633867890466e-10	0.0231299102024906	0.207688954611018	1	0.0245835916939021	1	6.96862587634684e-08	1	1
Slc2a9	SLC2A9	chr4	10027542	C	T	MODERATE	0/0=173	0/1=96	1/1=31	rs6820230	PASS	0.0668	0.757,0.243	0.73143,0.26857	0.9028,0.0972	0.7795,0.2205	0.4493,0.5507	0.7028,0.2972	0.9315,0.0685	0.7314,0.2686	0.263333333333333	0.784336497315172	0	0.0721475903296898	1.11496009284472e-31	0.14562888110944	0	1	0	1	4.5601867797349e-29	1	0
Zcchc4	ZCCHC4	chr4	25363901	T	A	MODERATE	0/0=8	0/1=56	1/1=236	rs315675	PASS	0.0334	0.126,0.874	0.123602,0.876398	0.2609,0.7391	0.1182,0.8818	0.00760000000000005,0.9924	0.1054,0.8946	0.1616,0.8384	0.1236,0.8764	0.88	0.799751605047589	1.71218594857692e-11	0.920573477950714	1.38374740402264e-29	0.367294059856906	0.0230108844349461	1	4.58865834218615e-09	1	5.61801446033192e-27	1	1
Lnx2	LNX2	chr13	28143229	A	G	MODERATE	0/0=67	0/1=145	1/1=88	rs8002697	PASS	0.0253	0.479,0.521	0.470248,0.529752	0.5387,0.4613	0.6182,0.3818	0.3238,0.6762	0.4264,0.5736	0.5378,0.4622	0.4702,0.5298	0.535	0.807692655078256	0.00424492354314721	3.37074632650314e-08	2.70854076336573e-09	0.131748988435463	0.0049805415674069	1	0.500900978091371	1.7157098801901e-05	7.4214016916221e-07	1	1
Depdc5	DEPDC5	chr22	32266603	A	G	MODERATE	0/0=287	0/1=13	1/1=0	rs61731662	PASS	0.0095	0.979,0.021	0.9796326,0.0203674	0.998,0.002	0.987,0.013	0.9629,0.0371	0.9751,0.0249	0.9826,0.0174	0.9796,0.02037	0.0216666666666667	0.831946776620048	7.32453943119715e-05	0.229361442331873	0.0760864676646684	0.680227766504174	0.546968693142509	1	0.0124517170330352	1	1	1	1
Sun1	SUN1	chr7	897496	G	A	MODERATE	0/0=207	0/1=87	1/1=6	rs59910530	PASS	0.0167	0.819,0.181	0.831669,0.168331	0.8641,0.1359	0.7594,0.2406	0.9228,0.0772	0.8151,0.1849	0.7434,0.2566	0.8317,0.1683	0.165	0.836597732012185	0.110746805971621	0.000790802308140279	5.61008106636507e-09	0.31260711963986	2.11984618572054e-05	1	1	0.322647341721234	1.50350172578584e-06	1	0.007843430887166
Reln	RELN	chr7	103292112	T	G	MODERATE	0/0=289	0/1=11	1/1=0	rs115734214	PASS	0.0104	0.975,0.025	0.9828275,0.0171725	0.9712,0.0288	0.9856,0.0144	0.9985,0.0015	0.9682,0.0318	0.9867,0.0133	0.9828,0.01717	0.0183333333333333	0.836711739474761	0.192626893137685	0.576501844706901	2.98121208182067e-05	0.105774672071697	0.427794823017955	1	1	1	0.00500843629745872	1	1
Rint1	RINT1	chr7	105177041	A	T	MODERATE	0/0=193	0/1=97	1/1=10	rs11556986	PASS	0.0297	0.811,0.189	0.808506,0.191494	0.9782,0.0218	0.83,0.17	0.7262,0.2738	0.8052,0.1948	0.7331,0.2669	0.8085,0.1915	0.195	0.836714903869883	0	0.244704276602982	0.000214857682794201	0.992189919985764	0.00116024505998971	1	0	1	0.0285760718116287	1	0.31906739149717
P2rx7	P2RX7	chr12	121592689	T	C	MODERATE	0/0=271	0/1=27	1/1=2	rs17525809	PASS	0.0146	0.94,0.060	0.9500799,0.0499201	0.9454,0.0546	0.9337,0.0663	0.9977,0.0023	0.9324,0.0676	0.9202,0.0798	0.9501,0.04992	0.0516666666666667	0.852984659239836	0.800427688460253	0.267197383161035	2.88657986402541e-14	0.199035097394663	0.0324344952004521	1	1	1	1.02762243159305e-11	1	1
Plb1	PLB1	chr2	28854958	C	T	MODERATE	0/0=170	0/1=106	1/1=24	rs2199619	PASS	0.0135	0.733,0.267	0.746605,0.253395	0.6796,0.3204	0.8156,0.1844	0.8079,0.1921	0.7177,0.2823	0.7137,0.2863	0.7466,0.2534	0.256666666666667	0.861839895666841	0.00680901657245159	0.00168819748583315	0.00133778047835054	0.2644972394869	0.200637626473118	1	0.762609856114578	0.666838006904094	0.159195876923714	1	1
Naaa	NAAA	chr4	76857309	C	T	MODERATE	0/0=184	0/1=103	1/1=13	rs4859571	PASS	0.0324	0.763,0.237	0.781949,0.218051	0.6419,0.3581	0.7017,0.2983	0.916,0.084	0.7694,0.2306	0.8149,0.1851	0.7819,0.2181	0.215	0.864125800530658	1.64509131750728e-09	0.000654276373664802	8.88178419700125e-16	0.468756449306537	0.146736004120517	1	4.06337555424298e-07	0.268253313202569	3.25961480029946e-13	1	1
Tlr1	TLR1	chr4	38799539	T	A	MODERATE	0/0=282	0/1=18	1/1=0	rs3923647	PASS	0.0157	0.969991764,0.030	0.9708466,0.0291534	1,0	0.9798,0.0202	0.9244,0.0756	0.9751,0.0249	0.9928,0.0072	0.9708,0.02915	0.03	0.90740861746122		0.257773414650598	0.000113452923193905	0.540435226361008	0.000434459216511085	1	NA	1	0.0158834092471467	1	0.133378979468903
Gsap	GSAP	chr7	76950699	C	T	MODERATE	0/0=254	0/1=43	1/1=3	rs17151692	PASS	0.0167	0.918,0.082	0.9195288,0.0804712	0.9911,0.0089	0.9553,0.0447	0.8389,0.1611	0.9155,0.0845	0.9335,0.0665	0.9195,0.08047	0.0816666666666667	0.919031461323802	3.73034936274053e-14	0.00590324875924297	2.56241670812061e-06	0.842558052414944	0.258671052077981	1	1.08926201392023e-11	1	0.000512483341624122	1	1
Hps4	HPS4	chr22	26860269	G	C	MODERATE	0/0=131	0/1=123	1/1=45	rs2014410	PASS	0.0281	0.617,0.383	0.645767,0.354233	0.6974,0.3026	0.7464,0.2536	0.7073,0.2927	0.6183,0.3817	0.4663,0.5337	0.6458,0.3542	0.3561872909699	0.924768386196116	0.0263568582544693	6.12129585266796e-05	0.00544593374166014	0.306717420612703	7.1470216424639e-12	1	1	0.0270561276687924	0.539147440424354	1	3.60924592944427e-09
Rbm19	RBM19	chr12	114282496	C	T	MODERATE	0/0=187	0/1=93	1/1=19	rs2075387	PASS	0.0196	0.752,0.248	0.780351,0.219649	0.869,0.131	0.7968,0.2032	0.8185,0.1815	0.6998,0.3002	0.7086,0.2914	0.7804,0.2196	0.219063545150502	0.973923632023762	4.02645930952517e-06	0.485569404464506	0.0535303835184335	0.000400847392361383	0.00156997598632939	1	0.000773080187428833	1	1	0.208841491420281	0.423893516308935
Abcb8	ABCB8	chr7	150739054	G	A	MODERATE	0/0=284	0/1=16	1/1=0	rs56198402	PASS	0.0144	0.963,0.037	0.9734425,0.0265575	0.9792,0.0208	0.9524,0.0476	0.9992,0.0008	0.9553,0.0447	0.9663,0.0337	0.9734,0.02656	0.0266666666666667	0.987463554875857	0.447745670286604	0.0492211181799698	2.10861528238127e-08	0.0673432869806321	0.434078181418962	1	1	1	5.41914127571986e-06	1	1
Acacb	ACACB	chr12	109665242	G	A	MODERATE	0/0=272	0/1=25	1/1=3	rs60293430	PASS	0.0220	0.951,0.049	0.9482827,0.0517173	0.998,0.002	0.9452,0.0548	0.8926,0.1074	0.9414,0.0586	0.9816,0.0184	0.9483,0.05172	0.0516666666666667	0.995777078517602	1.10398357122676e-11	0.802496575074637	7.6133065062774e-05	0.558844160321126	0.000216869902254002	1	2.98075564231225e-09	1	0.0114199597594161	1	0.0704827182325506
Oas1a	OAS1	chr12	113357237	G	T,C	MODERATE	0/0=34	0/1=1|0/2=132	1/1=0|2/2=133	rs1051042	PASS	0.0559	0.284061,9.390e-04,0.715	0.212259958,0.000599042,0.787141	0.255,0,0.745	0.2046,0,0.7954	0.0272,0,0.9728	0.3449,0.003,0.6521	0.2873,0,0.7127	0.2123,0.000599,0.7871	0.00166666666666667,0.663333333333333	0.354623029329967,7.33264141686091e-12	0.194785597865263,0.000453460736222318	0.281971895233966,8.20193594205418e-08	0.137610262760338,3.19157133603616e-81	0.604855410576267,0.646571112727486	0.201560145623984,0.0388614632437023	1,3.76164504684965e-09	1,0.0657518067522361	1,4.16658345856352e-05	1,1.46173967190456e-78	1,1	1,1
Oas1g	OAS1	chr12	113357237	G	T,C	MODERATE	0/0=34	0/1=1|0/2=132	1/1=0|2/2=133	rs1051042	PASS	0.0559	0.284061,9.390e-04,0.715	0.212259958,0.000599042,0.787141	0.255,0,0.745	0.2046,0,0.7954	0.0272,0,0.9728	0.3449,0.003,0.6521	0.2873,0,0.7127	0.2123,0.000599,0.7871	0.00166666666666667,0.663333333333333	0.354623029329967,7.33264141686091e-12	0.194785597865263,0.000453460736222318	0.281971895233966,8.20193594205418e-08	0.137610262760338,3.19157133603616e-81	0.604855410576267,0.646571112727486	0.201560145623984,0.0388614632437023	1,3.76164504684965e-09	1,0.0657518067522361	1,4.16658345856352e-05	1,1.46173967190456e-78	1,1	1,1
Shroom3	SHROOM3	chr4	77662486	G	A,T	MODERATE	0/0=236	0/1=1|0/2=60	1/1=0|2/2=2	rs71607374	PASS	0.0343	0.9360216,9.784e-04,0.063	0.95786743,0.00439297,0.0377396	0.995,0,0.005	0.9625,0,0.0375	0.9524,0.0166,0.031	0.9095,0,0.0905	0.9734,0,0.0266	0.9579,0.004393,0.03774	0.00167224080267559,0.107023411371237	0.32522486079918,1.22124532708767e-14	0.194040656357432,0	0.281168327499653,9.88101753307546e-07	0.00531050738774832,1.15878417972226e-11	0.194483395602974,0.27884252268534	0.200807750706379,2.45550246802395e-11	1,6.52145004664816e-12	1,0	1,0.000481205553860775	0.531050738774832,3.65017016612512e-09	1,1	1,1.2203847266079e-08
Ptpn12	PTPN12	chr7	77256713	A	G	MODERATE	0/0=212	0/1=77	1/1=11	rs3750050	PASS	0.1366	0.739,0.261	0.634984,0.365016	0.3095,0.6905	0.5634,0.4366	0.7829,0.2171	0.84,0.16	0.6104,0.3896	0.635,0.365	0.165	1.86595918709903e-22	2.31187342378539e-92	6.40051674639745e-26	0.00824460634266091	0.792420130360511	4.7711559487229e-21	1.03933926721416e-19	9.10878128971444e-90	3.70589919616412e-23	0.758503783524804	1	2.60027999205398e-18
Slc34a2	SLC34A2	chr4	25678199	A	G	MODERATE	0/0=38	0/1=52	1/1=203	rs6448389	PASS	0.0436	0.137,0.863	0.089257,0.910743	0.003,0.997	0.1225,0.8775	0.0182,0.9818	0.1531,0.8469	0.1851,0.8149	0.08926,0.9107	0.781569965870307	1.98543911986653e-22	1.65514973772225e-51	4.41203674518143e-06	3.40969497637019e-50	0.000992072570328169	0.109078923332367	1.10390415064579e-19	6.23991451121288e-49	0.00210454152745154	1.50026578960288e-47	0.508933228578351	1
Daglb	DAGLB	chr7	6456319	G	C	MODERATE	0/0=265	0/1=34	1/1=1	rs1055430	PASS	0.0230	0.958,0.042	0.9798323,0.0201677	1,0	0.9741,0.0259	0.9977,0.0023	0.9215,0.0785	0.999,0.001	0.9798,0.02017	0.06	2.33692087903137e-09		0.00221621218668688	0	0.164172220400369	5.44009282066327e-14	1.10536357578184e-06	NA	0.855457904061136	0	1	2.83972845238623e-11
Vsig10	VSIG10	chr12	118509191	G	A	MODERATE	0/0=148	0/1=105	1/1=47	rs7307331	PASS	0.1226	0.623,0.377	0.458067,0.541933	0.2192,0.7808	0.4928,0.5072	0.2663,0.7337	0.7187,0.2813	0.6708,0.3292	0.4581,0.5419	0.331666666666667	2.00302951516427e-22	1.53490216323414e-71	1.91341265586139e-10	7.79957703806704e-63	0.033128121888742	0.919432175469782	1.11168138091617e-19	5.9707694149808e-69	1.0160221202624e-07	3.46301220490177e-60	1	1
Gtf2ird2	GTF2IRD2	chr7	74212352	A	G	MODERATE	0/0=277	0/1=11	1/1=12	rs200619072	PASS	0.3330	0.998773,1.227e-03	0.986222,0.013778	1,0	0.9885,0.0115	0.9962,0.0038	0.9682,0.0318	0.9755,0.0245	0.9862,0.01378	0.0583333333333333	2.08721928629529e-14		2.75600754151561e-06	8.65973959207622e-15	0.0100870882882653	0.000581407562225467	1.11248787959539e-11	NA	0.00132012761238598	3.11750625314744e-12	1	0.173259453543189
P2rx7	P2RX7	chr12	121622304	A	C	MODERATE	0/0=244	0/1=45	1/1=11	rs3751143	PASS	0.0234	0.81,0.190	0.792532,0.207468	0.7331,0.2669	0.8084,0.1916	0.9153,0.0847	0.7913,0.2087	0.6779,0.3221	0.7925,0.2075	0.111666666666667	2.50130881838656e-08	1.31506470662732e-13	7.28085707301683e-05	0.0594077452698125	6.37114142849136e-07	2.70619785246336e-21	1.11558373300041e-05	3.76743383749775e-11	0.0321085796920042	1	0.00035359834928127	1.48029022529746e-18
Pgm1	PGM2	chr4	37851856	A	C	MODERATE	0/0=276	0/1=24	1/1=0	rs10001580	PASS	0.0889	0.939,0.061	0.871206,0.128794	0.8026,0.1974	0.8573,0.1427	0.7943,0.2057	0.9732,0.0268	0.9509,0.0491	0.8712,0.1288	0.04	2.28170717790342e-10	1.02181827404416e-18	3.37036488360726e-10	1.09324958785996e-20	0.144308855804668	0.40044734429274	1.11803651717268e-07	3.32090939064352e-16	1.78292302342824e-07	4.25274089677524e-18	1	1
Selplg	SELPLG	chr12	109017898	C	T	MODERATE	0/0=250	0/1=45	1/1=5	rs2228315	PASS	0.0693	0.888,0.112	0.817292,0.182708	0.7222,0.2778	0.8516,0.1484	0.6868,0.3132	0.9324,0.0676	0.9489,0.0511	0.8173,0.1827	0.0916666666666667	2.52058657257791e-08	6.19703289540903e-19	0.00188019039041228	1.09200191513232e-25	0.0793602532363504	0.00169412486409892	1.12166102479717e-05	2.02023272390334e-16	0.738914823432026	4.35708764137796e-23	1	0.455719588442609
Upk3b	UPK3B	chr7	76144455	A	C	MODERATE	0/0=14	0/1=2	1/1=284	rs1799125	PASS	0.0340	0.00488259999999996,0.995	0.010383,0.989617	0,1	0,1	0.0393,0.9607	0,1	0,1	0.01038,0.9896	0.95	2.17438533733902e-14	7.69608541058791e-13	2.51982191673604e-09	0.281995276038176	8.10111611239102e-13	1.66157206411375e-12	1.15677299946436e-11	2.17029608578579e-10	1.31030739670274e-06	1	4.6905462290744e-10	8.47401752698012e-10
Mmp17	MMP17	chr12	132325239	G	A	MODERATE	0/0=160	0/1=66	1/1=59	rs6598163	PASS	0.0101	0.528,0.472	0.546326,0.453674	0.4762,0.5238	0.5576,0.4424	0.5484,0.4516	0.5417,0.4583	0.6125,0.3875	0.5463,0.4537	0.32280701754386	2.46744349972762e-09	1.2848243034081e-14	1.42016589571225e-05	1.7832468148784e-07	1.47066245475077e-07	0.0107105334937652	1.16463333187144e-06	3.84162466719022e-12	0.00660377141506196	4.13713261051789e-05	8.2210031220568e-05	1
Sparcl1	SPARCL1	chr4	88415636	G	C	MODERATE	0/0=109	0/1=131	1/1=60	rs1049544	PASS	0.0753	0.543,0.457	0.424321,0.575679	0.5625,0.4375	0.4957,0.5043	0.1172,0.8828	0.6213,0.3787	0.4438,0.5562	0.4243,0.5757	0.418333333333333	2.21243273584484e-13	0.452803772376606	0.00198765144529182	4.28909509852103e-102	0.115765284937722	1.05303707909598e-07	1.16816448452608e-10	1	0.773196412218518	2.00729650610784e-99	1	4.69654537276807e-05
Rbm19	RBM19	chr12	114395651	T	C	MODERATE	0/0=240	0/1=54	1/1=6	rs10850256	PASS	0.0645	0.864,0.136	0.786542,0.213458	0.8194,0.1806	0.9179,0.0821	0.593,0.407	0.8857,0.1143	0.819,0.181	0.7865,0.2135	0.11	2.51549105379759e-09	0.000150187231587101	0.0878966673049044	1.27502273544827e-38	0.792070107932573	0.00014874846243941	1.18479628633866e-06	0.0240299570539362	1	5.34234526152825e-36	1	0.0495332379923235
Aasdh	AASDH	chr4	57204777	A	C	MODERATE	0/0=233	0/1=62	1/1=5	rs8340	PASS	0.0681	0.823991764,0.176	0.774361,0.225639	0.7847,0.2153	0.621,0.379	0.7769,0.2231	0.8698,0.1302	0.771,0.229	0.7744,0.2256	0.12	2.54037864709599e-09	1.48339423761393e-06	2.77423501954053e-26	9.86836405583166e-08	0.551778502157252	7.25900299263238e-08	1.19397796413512e-06	0.000296678847522786	1.61460478137259e-23	2.31906555312044e-05	1	3.25929234369194e-05
Helq	HELQ	chr4	84374480	C	T	MODERATE	0/0=72	0/1=148	1/1=80	rs1494961	PASS	0.0390	0.438,0.562	0.335463,0.664537	0.3224,0.6776	0.3559,0.6441	0.174,0.826	0.5099,0.4901	0.3732,0.6268	0.3355,0.6645	0.513333333333333	2.30013390113662e-13	5.7071634791632e-11	1.95224940587097e-06	2.89565828989979e-46	0.367676710909791	9.05058338082656e-06	1.212170565899e-10	1.51239832197825e-08	0.000942936463035679	1.25382003952661e-43	1	0.00344827226809492
Noa1	NOA1	chr4	57843295	C	A	MODERATE	0/0=285	0/1=11	1/1=1	rs3733306	PASS	0.0641	0.945,0.055	0.9053514,0.0946486	0.8046,0.1954	0.7594,0.2406	0.9531,0.0469	0.9692,0.0308	0.9826,0.0174	0.9054,0.09465	0.0218855218855219	2.65825464870425e-09	2.7837082212368e-23	1.54515431282996e-29	0.0090232270705766	0.292050380565525	0.528659944029002	1.24672143024229e-06	9.52028211662986e-21	9.00824964379867e-27	0.821113663422471	1	1
Dhx37	DHX37	chr12	125453115	C	T	MODERATE	0/0=239	0/1=52	1/1=7	rs11057939	PASS	0.0371	0.891,0.109	0.9462859,0.0537141	1,0	0.9006,0.0994	0.9924,0.0076	0.8419,0.1581	0.9683,0.0317	0.9463,0.05371	0.110738255033557	2.8392892925666e-08		0.507139056896775	0	0.00836825478893741	2.53467247190997e-10	1.26064444589957e-05	NA	1	0	1	1.2445241837078e-07
Fras1	FRAS1	chr4	79443837	A	T	MODERATE	0/0=219	0/1=74	1/1=7	rs931605	PASS	0.0421	0.864,0.136	0.9207268,0.0792732	0.998,0.002	0.8977,0.1023	0.9334,0.0666	0.8171,0.1829	0.9468,0.0532	0.9207,0.07927	0.146666666666667	2.85596961635548e-08	0	0.0153377151048069	1.71181075980797e-08	0.061093887106474	2.32366570429576e-10	1.26519454004548e-05	0	1	4.41647176030456e-06	1	1.14324352651351e-07
Gtpbp10	GTPBP10	chr7	90001496	G	C	MODERATE	0/0=239	0/1=56	1/1=5	rs35001814	PASS	0.0265	0.897,0.103	0.9494808,0.0505192	0.998,0.002	0.9035,0.0965	0.9932,0.0068	0.8698,0.1302	0.955,0.045	0.9495,0.05052	0.11	2.77509770718609e-09	0	0.425133439145125	0	0.232560086121546	8.57006018595285e-07	1.29874572696309e-06	0	1	0	1	0.000362513545865806
Nom1	NOM1	chr7	156762248	G	A	MODERATE	0/0=153	0/1=71	1/1=59	rs12919	PASS	0.0298	0.485,0.515	0.51857,0.48143	0.7222,0.2778	0.464,0.536	0.444,0.556	0.4294,0.5706	0.5399,0.4601	0.5186,0.4814	0.333922261484099	2.59695449134872e-11	0.0194829334397213	7.01472282626116e-13	9.22436268503819e-19	2.0108039458842e-19	1.22977232479331e-06	1.30626810914841e-08	1	3.83705338596485e-10	3.50525782031451e-16	1.16827709255872e-16	0.00050912574246443
Daglb	DAGLB	chr7	6476104	G	A	MODERATE	0/0=274	0/1=23	1/1=3	rs117103601	PASS	0.0119	0.976,0.024	0.9844249,0.0155751	1,0	0.9683,0.0317	1,0	0.9602,0.0398	0.9836,0.0164	0.9844,0.01558	0.0483333333333333	2.97886884048637e-08		0.125154294580328		0.414717334134352	0.000217195299798467	1.31666002749498e-05	NA	1	NA	1	0.0704827182325506
Sparcl1	SPARCL1	chr4	88416188	G	T	MODERATE	0/0=109	0/1=131	1/1=60	rs13051	PASS	0.0758	0.543,0.457	0.42472,0.57528	0.5625,0.4375	0.4971,0.5029	0.118,0.882	0.6213,0.3787	0.4438,0.5562	0.4247,0.5753	0.418333333333333	2.55342468809339e-13	0.452803772376606	0.00234976222097932	1.29350944298274e-101	0.115765284937722	1.05303707909598e-07	1.34310138593712e-10	1	0.89995893063508	6.0406890987294e-99	1	4.69654537276807e-05
Ptpn12	PTPN12	chr7	77247821	G	A	MODERATE	0/0=61	0/1=133	1/1=105	rs9640663	PASS	0.0662	0.328,0.672	0.21266,0.78734	0.0952,0.9048	0.2305,0.7695	0.1271,0.8729	0.3748,0.6252	0.2699,0.7301	0.2127,0.7873	0.573578595317726	2.44402608597794e-31	2.2449178382697e-54	5.46973577200574e-14	1.26522378472744e-48	0.0407663752322285	1.3997764897867e-10	1.37843071249156e-28	8.53068778542486e-52	3.01382441037516e-11	5.51637570141164e-46	1	6.9148958595463e-08
Selplg	SELPLG	chr12	109017266	G	A	MODERATE	0/0=286	0/1=14	1/1=0	rs61729674	PASS	0.0895	0.958,0.042	0.9111422,0.0888578	0.998,0.002	0.9726,0.0274	0.7542,0.2458	0.9722,0.0278	0.9274,0.0726	0.9111,0.08886	0.0233333333333333	3.15099652832421e-08	3.09443756252303e-05	0.643619804039753	1.9510605762388e-32	0.587254449331028	2.57310959605572e-05	1.38958946899098e-05	0.00550809886129099	1	8.01885896834147e-30	1	0.00944331221752449
Ankle2	ANKLE2	chr12	133331537	G	A	MODERATE	0/0=123	0/1=134	1/1=43	rs1132375	PASS	0.0461	0.664,0.336	0.739617,0.260383	0.7579,0.2421	0.7853,0.2147	0.913,0.087	0.5895,0.4105	0.6084,0.3916	0.7396,0.2604	0.366666666666667	3.198124587378e-08	9.72790761277764e-08	1.56129620343393e-09	0	0.0820358456471898	0.322413866597789	1.40717481844632e-05	2.18877921287497e-05	8.18119210599379e-07	0	1	1
Arhgap24	ARHGAP24	chr4	86916056	C	G	MODERATE	0/0=284	0/1=16	1/1=0	rs35521695	PASS	0.0100	0.989,0.011	0.99440895,0.00559105	1,0	0.9899,0.0101	1,0	0.9851,0.0149	0.9939,0.0061	0.9944,0.005591	0.0266666666666667	3.21461384178434e-08		0.0245308321989641		0.0972650856995827	0.000711364140587145	1.41121547654333e-05	NA	1	NA	1	0.207718329051446
Pxn	PXN	chr12	120661977	T	C	MODERATE	0/0=33	0/1=85	1/1=182	rs4767884	PASS	0.0990	0.183,0.817	0.099241,0.900759	0.0149,0.9851	0.1888,0.8112	0.0242,0.9758	0.2386,0.7614	0.0808,0.9192	0.09924,0.9008	0.748333333333333	2.5400967037037e-28	1.8633677367875e-51	0.00630325306453329	7.53658566054995e-56	0.555034184637332	9.86579085259587e-21	1.43007444418518e-25	7.006262690321e-49	1	3.32363427630253e-53	1	5.36699022381215e-18
Kcnh2	KCNH2	chr7	150645534	T	G	MODERATE	0/0=289	0/1=6	1/1=4	rs1805123	PASS	0.0430	0.81998352,0.180	0.863818,0.136182	0.9464,0.0536	0.83,0.17	0.9932,0.0068	0.7465,0.2535	0.7485,0.2515	0.8638,0.1362	0.0234113712374582	2.69574700756426e-15	0.00368586373991003	4.13145449369415e-18	0.00194173718102175	8.601657444702e-33	2.45820834881032e-32	1.44222464904688e-12	0.445989512529114	2.32600887994981e-15	0.223293472393442	5.01476629026127e-30	1.36676384193854e-29
Hsd17b13	HSD17B13	chr4	88231429	G	A	MODERATE	0/0=263	0/1=36	1/1=1	rs62305723	PASS	0.0207	0.952,0.048	0.9778355,0.0221645	1,0	0.9611,0.0389	0.9962,0.0038	0.9384,0.0616	0.9826,0.0174	0.9778,0.02216	0.0633333333333333	3.1119544718905e-09		0.0447811699692149	2.22044604925031e-16	0.88938340296891	1.3743072089234e-06	1.45328273837286e-06	NA	1	8.34887714518117e-14	1	0.000562091648449671
Fam114a1	FAM114A1	chr4	38879949	G	A	MODERATE	0/0=144	0/1=127	1/1=29	rs11096964	PASS	0.0323	0.753,0.247	0.796725,0.203275	0.9137,0.0863	0.7939,0.2061	0.6808,0.3192	0.7525,0.2475	0.8804,0.1196	0.7967,0.2033	0.308333333333333	3.13648040872749e-09	0	2.48948536998306e-05	0.634851713233123	0.00791353173268172	0	1.46159987046701e-06	0	0.0113769481408226	1	1	0
Rbm19	RBM19	chr12	114377835	A	G	MODERATE	0/0=256	0/1=37	1/1=6	rs2290788	PASS	0.0450	0.871,0.129	0.807308,0.192692	0.8115,0.1885	0.9265,0.0735	0.6755,0.3245	0.8867,0.1133	0.8149,0.1851	0.8073,0.1927	0.0819397993311037	2.92488521104992e-11	6.61489663185299e-09	0.571374959965151	5.10274672002576e-30	0.0444152143763776	1.81654825952319e-08	1.46829237594706e-08	1.58096029501286e-06	1	2.07681791505048e-27	1	8.46511488937807e-06
Fam220a	FAM220A	chr7	6370194	C	T	MODERATE	0/0=84	0/1=141	1/1=75	rs6952125	PASS	0.1020	0.409,0.591	0.267372,0.732628	0.1161,0.8839	0.3386,0.6614	0.1006,0.8994	0.5447,0.4553	0.3129,0.6871	0.2674,0.7326	0.485	2.61774412059324e-36	8.40841742197233e-69	1.45038025577653e-10	4.93793941336933e-89	0.248428766448579	1.3362962626185e-15	1.48687866049696e-33	3.24564912488132e-66	7.71602296073114e-08	2.29120388780337e-86	1	7.06900722925187e-13
Slc4a1ap	SLC4A1AP	chr2	27887034	C	A	MODERATE	0/0=89	0/1=128	1/1=83	rs9678851	PASS	0.0793	0.527958814,0.472	0.660942,0.339058	0.9206,0.0794	0.6499,0.3501	0.7466,0.2534	0.4612,0.5388	0.4908,0.5092	0.6609,0.3391	0.49	2.8643754035329e-13	0	3.51678064225425e-07	0	0.0582600591311666	0.458995783096562	1.50379708685477e-10	0	0.000174080641791585	0	1	1
P2rx7	P2RX7	chr12	121615131	C	G	MODERATE	0/0=263	0/1=34	1/1=3	rs2230911	PASS	0.0721	0.868,0.132	0.835064,0.164936	0.8323,0.1677	0.7378,0.2622	0.8411,0.1589	0.9215,0.0785	0.8098,0.1902	0.8351,0.1649	0.0666666666666667	3.07559400192181e-10	5.66606399039522e-09	1.34566339232183e-20	2.55414992050023e-08	0.381062816823213	1.04406148334744e-11	1.50396546693976e-07	1.36552142168525e-06	7.68373797015765e-18	6.41091630045558e-06	1	5.2203074167372e-09
Plb1	PLB1	chr2	28827625	C	T	MODERATE	0/0=245	0/1=51	1/1=4	rs34289907	PASS	0.0206	0.928,0.072	0.956869,0.043131	1,0	0.9366,0.0634	0.975,0.025	0.8946,0.1054	0.9663,0.0337	0.9569,0.04313	0.0983333333333333	3.27446714187829e-09		0.0206019046972024	3.02602387591833e-12	0.651859496082812	1.0354498436449e-07	1.5226272209734e-06	NA	1	9.89509807425294e-10	1	4.6284608010927e-05
Nom1	NOM1	chr7	156762224	G	C	MODERATE	0/0=204	0/1=39	1/1=50	rs2302443	PASS	0.0303	0.492,0.508	0.542732,0.457268	0.7222,0.2778	0.4726,0.5274	0.531,0.469	0.4294,0.5706	0.5399,0.4601	0.5427,0.4573	0.237201365187713	2.71544020237622e-24	0.0758284688810296	3.5536292899571e-26	1.38846697418271e-21	4.41015289947094e-38	1.29489017417589e-18	1.52336195353306e-21	1	2.06465861746508e-23	5.46801527871017e-19	2.5799394461905e-35	6.99240694054981e-16
Helq	HELQ	chr4	84376743	A	T	MODERATE	0/0=4	0/1=0	1/1=296	rs6831595	PASS	-0.0000	0,1.000	0,1	0,1	0,1	0,1	0,1	0,1	0,1	0.986666666666667	2.90202748918142e-16	0.000237649869849875	0.00227794949844714	2.5858019607584e-05	0.000241057621225176	0.000294281461737462	1.56419281666879e-13	0.0356211120403919	0.877010556902149	0.00439586333328928	0.126073135900767	0.0938757862942504
Prr14l	PRR14L	chr22	32110163	G	A	MODERATE	0/0=183	0/1=99	1/1=18	rs140078	PASS	0.0676	0.735,0.265	0.654752,0.345248	0.8125,0.1875	0.6945,0.3055	0.4153,0.5847	0.7952,0.2048	0.6431,0.3569	0.6548,0.3452	0.225	3.44626729002449e-09	0.0698142062678673	0.00111546998613744	1.63498552636324e-48	0.338288112182289	3.47411673867794e-08	1.59906802257136e-06	1	0.445072524468839	7.1121870396801e-46	1	1.5911454663145e-05
Tchp	TCHP	chr12	110341933	A	G	MODERATE	0/0=200	0/1=83	1/1=17	rs10774978	PASS	0.1076	0.836,0.164	0.688099,0.311901	0.8562,0.1438	0.8156,0.1844	0.326,0.674	0.8231,0.1769	0.7751,0.2249	0.6881,0.3119	0.195	3.45624812940621e-09	0.0071682361832166	0.627411861577926	1.47127275858824e-84	0.364817226166054	0.159430039989691	1.60024288391508e-06	0.788505980153826	1	6.79728014467767e-82	1	1
Selplg	SELPLG	chr12	109017264	T	C	MODERATE	0/0=282	0/1=16	1/1=2	rs7300972	PASS	0.1310	0.95,0.050	0.889377,0.110623	0.998,0.002	0.9625,0.0375	0.6838,0.3162	0.9722,0.0278	0.9182,0.0818	0.8894,0.1106	0.0333333333333333	3.58486401817375e-09	1.70226815532359e-07	0.686534048095285	1.02877821470688e-42	0.528566498450613	0.000124941722605973	1.65620717639627e-06	3.72796726015866e-05	1	4.40317075894545e-40	1	0.0419804187956069
Pigg	PIGG	chr4	517461	T	C	MODERATE	0/0=237	0/1=58	1/1=5	rs7666425	PASS	0.0346	0.848,0.152	0.775759,0.224241	0.7798,0.2202	0.9006,0.0994	0.6044,0.3956	0.8688,0.1312	0.819,0.181	0.7758,0.2242	0.113333333333333	3.45110677325395e-10	7.01268700286685e-08	0.416558320120086	1.87707879903253e-35	0.294156223105626	0.00031458626616857	1.68414010534793e-07	1.60590532365651e-05	1	7.789877015985e-33	1	0.0994092601092681
Iqce	IQCE	chr7	2645526	G	A	MODERATE	0/0=237	0/1=57	1/1=6	rs10950797	PASS	0.0707	0.8,0.200	0.745008,0.254992	0.5585,0.4415	0.7118,0.2882	0.8865,0.1135	0.8469,0.1531	0.6646,0.3354	0.745,0.255	0.115	3.2670609615339e-14	5.41083555765759e-42	1.91184230194662e-14	0.923605131164287	0.0326824602157363	1.18884877201259e-22	1.7348093705745e-11	2.00200915633331e-39	1.05724879297648e-11	1	1	6.53866824606925e-20
Fam220a	FAM220A	chr7	6370406	C	T	MODERATE	0/0=86	0/1=144	1/1=70	rs3750040	PASS	0.0953	0.411991764,0.588	0.276957,0.723043	0.1161,0.8839	0.3429,0.6571	0.1331,0.8669	0.5457,0.4543	0.3139,0.6861	0.277,0.723	0.473333333333333	3.09405638806749e-36	4.81282208392289e-72	2.69659232077483e-11	5.63256294357526e-75	0.459183903046419	4.70791250395166e-17	1.75432997203427e-33	1.87700061272993e-69	1.45076666857686e-08	2.53465332460887e-72	1	2.53285692712599e-14
Sh3tc1	SH3TC1	chr4	8228943	G	A	MODERATE	0/0=251	0/1=48	1/1=1	rs34994651	PASS	0.0299	0.949,0.051	0.9698482,0.0301518	0.998,0.002	0.9323,0.0677	0.9947,0.0053	0.9195,0.0805	0.9857,0.0143	0.9698,0.03015	0.0833333333333333	3.54114515488391e-11	0	0.286848335114108	0	0.84093615724966	1.48667744781505e-11	1.77411372259684e-08	0	1	0	1	7.4185204645971e-09
Sowahb	SOWAHB	chr4	77818548	T	C	MODERATE	0/0=283	0/1=6	1/1=9	rs2703129	PASS	0.1420	0.819,0.181	0.666134,0.333866	0.7728,0.2272	0.7608,0.2392	0.5076,0.4924	0.668,0.332	0.7014,0.2986	0.6661,0.3339	0.0402684563758389	3.1164087226306e-49	3.23550584721453e-23	9.06323947593567e-24	4.59260131185187e-82	8.09584678042237e-42	2.305812212738e-35	1.7825857893447e-46	1.10330749390015e-20	5.22042593813895e-21	2.11259660345186e-79	4.74416621332751e-39	1.28433740249507e-32
Nom1	NOM1	chr7	156742796	A	C	MODERATE	0/0=264	0/1=24	1/1=6	rs6952214	PASS	0.0466	0.903,0.097	0.794529,0.205471	0.7579,0.2421	0.7594,0.2406	0.7557,0.2443	0.8499,0.1501	0.8528,0.1472	0.7945,0.2055	0.0612244897959184	3.47633094953258e-17	5.00022488407725e-20	1.83940559182086e-18	3.26187778218238e-21	1.03531136430707e-07	2.3920585148933e-07	1.89112403654572e-14	1.6700751112818e-17	1.04110356497061e-15	1.27865609061549e-18	5.79774364011959e-05	0.000104293751249348
Pole	POLE	chr12	133202816	C	T	MODERATE	0/0=281	0/1=19	1/1=0	rs5745066	PASS	0.0164	0.98394234,0.016	0.99540735,0.00459265	1,0	0.9971,0.0029	0.997,0.003	0.9831,0.0169	1,0	0.9954,0.004593	0.0316666666666667	3.62376795237651e-13		4.44927421978658e-05	8.33847002557064e-08	0.0531328079354993		1.89885440704529e-10	NA	0.019888255762446	1.98455586608581e-05	1	NA
Atxn2	ATXN2	chr12	111993712	C	T	MODERATE	0/0=286	0/1=13	1/1=1	rs7969300	PASS	0.3008	0.915,0.085	0.820487,0.179513	0.4772,0.5228	0.8847,0.1153	0.8495,0.1505	0.998,0.002	0.907,0.093	0.8205,0.1795	0.025	3.54402680488531e-22	1.03499068634263e-92	5.29414493690541e-10	5.24021099146705e-16	1.32768330149968e-05	1.61030658458876e-07	1.96339084990646e-19	4.08821321105339e-90	2.78472023681225e-07	1.93363785585134e-13	0.00727570449221825	7.05314284049877e-05
Letm1	LETM1	chr4	1843324	C	T	MODERATE	0/0=258	0/1=42	1/1=0	rs116753949	PASS	0.0208	0.95590116,0.044	0.9796326,0.0203674	0.999,0.001	0.9625,0.0375	0.9955,0.0045	0.9443,0.0557	0.9867,0.0133	0.9796,0.02037	0.07	3.77475828372553e-13	0	0.00899230693959097	0	0.246874576554683	2.50635090459639e-09	1.97419858238845e-10	0	1	0	1	1.20054208330167e-06
Helq	HELQ	chr4	84361071	G	A	MODERATE	0/0=290	0/1=10	1/1=0	rs6817280	PASS	0.2101	0.975991763,0.024	0.9157348,0.0842652	1,0	0.9697,0.0303	0.6974,0.3026	0.999,0.001	1,0	0.9157,0.08427	0.0166666666666667	4.40368950467887e-09		0.109901632379935	1.23305400782393e-45	0.000231827984247257		2.03010086165696e-06	NA	1	5.31446277372114e-43	0.121477863745563	NA
Fam220a	FAM220A	chr7	6370305	C	G	MODERATE	0/0=85	0/1=144	1/1=71	rs3750039	PASS	0.0950	0.40890116,0.591	0.277556,0.722444	0.1171,0.8829	0.3429,0.6571	0.1369,0.8631	0.5427,0.4573	0.3139,0.6861	0.2776,0.7224	0.476666666666667	3.80605532743393e-35	1.13864801563233e-70	5.97304792021561e-11	4.55946903291771e-72	0.451567685123192	1.37473677684005e-16	2.1542273153276e-32	4.41795430065344e-68	3.20155368523557e-08	2.03808265771422e-69	1	7.38233649163107e-14
Ulk1	ULK1	chr12	132401566	C	T	MODERATE	0/0=143	0/1=120	1/1=36	rs11546871	PASS	0.0510	0.738991696,0.261	0.796326,0.203674	0.9623,0.0377	0.7349,0.2651	0.9123,0.0877	0.674,0.326	0.638,0.362	0.7963,0.2037	0.321070234113712	4.35496083639464e-11	0	0.0272141622981863	0	0.838375103243376	0.0975247072836281	2.17748041819732e-08	0	1	0	1	1
P2rx7	P2RX7	chr12	121622520	A	T	MODERATE	0/0=6	0/1=16	1/1=278	rs1653624	PASS	0.1611	0.021,0.979	0.00579099999999999,0.994209	0,1	0.00860000000000005,0.9914	0.00149999999999995,0.9985	0.0209,0.9791	0,1	0.005791,0.9942	0.953333333333333	3.98627148348005e-21	4.54597192403371e-12	1.94516784333811e-05	1.31809880071355e-13	0.00368761311679685	9.32951172816332e-12	2.19643558739751e-18	1.24559630718524e-09	0.00898667543622207	4.56062185046888e-11	1	4.70207391099431e-09
Cc2d2a	CC2D2A	chr4	15482360	C	T	HIGH	0/0=282	0/1=18	1/1=0	rs1861050	PASS	0.0606	0.922,0.078	0.88119,0.11881	0.8353,0.1647	0.781,0.219	0.8843,0.1157	0.9583,0.0417	0.9162,0.0838	0.8812,0.1188	0.03	4.44792934072852e-11	2.28571366554291e-16	1.05109879129385e-23	9.60264559791466e-10	0.231487006951466	2.05125032732592e-05	2.21951674102353e-08	7.10856949983845e-14	6.04381804993964e-21	2.74635664100359e-07	1	0.00761013871437916
Sart3	SART3	chr12	108954862	G	C	MODERATE	0/0=219	0/1=72	1/1=9	rs2072579	PASS	0.0556	0.776,0.224	0.749601,0.250399	0.6181,0.3819	0.611,0.389	0.8555,0.1445	0.839,0.161	0.7485,0.2515	0.7496,0.2504	0.15	5.20421286388229e-08	6.31406593085541e-23	1.09292452831065e-21	0.751827030065483	0.557642708268857	1.74129719114044e-06	2.27944523438044e-05	2.14678241649084e-20	6.26245754722002e-19	1	1	0.0007104492539853
Upk3b	UPK3B	chr7	76144560	T	C	MODERATE	0/0=13	0/1=2	1/1=285	rs1799126	PASS	0.0389	0.005,0.995	0.010783,0.989217	0.001,0.999	0,1	0.0401,0.9599	0,1	0,1	0.01078,0.9892	0.953333333333333	4.52312492443252e-12	2.84740765126398e-11	8.74055833150284e-09	0.506744845710601	4.76907648441751e-12	9.32951172816332e-12	2.33393246100718e-09	7.57410435236219e-09	4.49801484839299e-06	1	2.7517571315089e-09	4.70207391099431e-09
Golga3	GOLGA3	chr12	133357412	T	C	MODERATE	0/0=209	0/1=78	1/1=12	rs2291260	PASS	0.0286	0.732,0.268	0.693291,0.306709	0.7123,0.2877	0.7507,0.2493	0.6672,0.3328	0.7813,0.2187	0.5777,0.4223	0.6933,0.3067	0.17056856187291	4.54309462180105e-12	1.27140136264936e-07	0.000566291249122537	2.5988853750053e-13	0.0199635228308869	4.7014508569851e-25	2.33969373022754e-09	2.79708299782859e-05	0.233878285887608	8.86219912876807e-11	1	2.60460377476975e-22
Cwh43	CWH43	chr4	48988450	C	A	MODERATE	0/0=95	0/1=135	1/1=70	rs3747690	PASS	0.2095	0.72,0.280	0.704872,0.295128	0.8175,0.1825	0.4957,0.5043	0.8744,0.1256	0.508,0.492	0.7106,0.2894	0.7049,0.2951	0.458333333333333	4.44089209850063e-16	0	0.0989205117394221	0	0.19139212887389	9.50395318000119e-12	2.38919994899334e-13	0	1	0	1	4.7614805431806e-09
Psapl1	PSAPL1	chr4	7435486	G	T	MODERATE	0/0=223	0/1=69	1/1=8	rs61738677	PASS	0.0276	0.89,0.110	0.9233227,0.0766773	0.9266,0.0734	0.8963,0.1037	0.9871,0.0129	0.8658,0.1342	0.9121,0.0879	0.9233,0.07668	0.141666666666667	5.50707133228912e-08	9.18682565997919e-06	0.0369703586398002	0	0.673758776589047	0.000850443058552086	2.40659017221035e-05	0.00171793639841611	1	0	1	0.242376271687345
Aasdh	AASDH	chr4	57215677	G	A	MODERATE	0/0=116	0/1=128	1/1=56	rs3796544	PASS	0.0469	0.637,0.363	0.722045,0.277955	0.9276,0.0724	0.7061,0.2939	0.7171,0.2829	0.5845,0.4155	0.6697,0.3303	0.722,0.278	0.4	4.9905346521939e-10	0	6.0955728956591e-05	3.36133022527108e-07	0.541179587579687	0.00502102881690192	2.43039037561843e-07	0	0.0270033879277698	7.56299300685993e-05	1	1
Arl6ip4	ARL6IP4	chr12	123466304	A	G	MODERATE	0/0=286	0/1=11	1/1=3	rs74758272	PASS	0.0705	0.976,0.024	0.890974,0.109026	1,0	0.9654,0.0346	0.6059,0.3941	0.999,0.001	1,0	0.891,0.109	0.0283333333333333	5.12349929896934e-10		0.52107175542916	1.58595862843137e-61	4.83447432975126e-07		2.4900206592991e-07	NA	1	7.00993713766666e-59	0.00026879677273417	NA
Anapc7	ANAPC7	chr12	110841437	C	T	MODERATE	0/0=278	0/1=21	1/1=1	rs141147170	PASS	-0.0043	0.975,0.025	0.9890176,0.0109824	1,0	0.9798,0.0202	0.9962,0.0038	0.9722,0.0278	0.9918,0.0082	0.989,0.01098	0.0383333333333333	6.44548836525871e-08		0.0510210808352347	4.83615414381688e-09	0.244047472103459	2.84082067740776e-05	2.8102329272528e-05	NA	1	1.30092546468674e-06	1	0.0103405872657642
Clip1	CLIP1	chr12	122817580	A	G	MODERATE	0/0=257	0/1=39	1/1=4	rs17883517	PASS	0.0181	0.938,0.062	0.9686502,0.0313498	0.999,0.001	0.9409,0.0591	0.997,0.003	0.8966,0.1034	0.9928,0.0072	0.9687,0.03135	0.0783333333333333	6.29297858267819e-09	0	0.170582261463887	0	0.0959253966543615	4.59632332194815e-14	2.89477014803197e-06	0	1	0	1	2.40387709737888e-11
Wfs1	WFS1	chr4	6302519	G	A	MODERATE	0/0=28	0/1=121	1/1=151	rs1801212	PASS	0.0552	0.218,0.782	0.115615,0.884385	0.005,0.995	0.2233,0.7767	0.00609999999999999,0.9939	0.2704,0.7296	0.1421,0.8579	0.1156,0.8844	0.705	5.17588317288344e-34	1.70921423754733e-70	0.00322865894979233	4.42050291640584e-88	0.287945401274901	1.73279564360168e-13	2.92437399267914e-31	6.61465909930817e-68	1	2.0466928502959e-85	1	9.01053734672874e-11
Rbm19	RBM19	chr12	114377899	G	C	MODERATE	0/0=11	0/1=0	1/1=286	rs7299217	PASS	-0.0016	0.002,0.998	0.00459299999999996,0.995407	0,1	0.00290000000000001,0.9971	0.0159,0.9841	0,1	0,1	0.004593,0.9954	0.962962962962963	5.51136129920779e-17	7.62745566037642e-10	6.3291945188053e-06	0.00387267003115953	7.92416048792113e-10	1.35234602653932e-09	2.99266918546983e-14	1.92366037027904e-07	0.00300003820191371	0.41437569333407	4.5009231571392e-07	6.5588782287157e-07
Hgf	HGF	chr7	81359051	C	T	MODERATE	0/0=262	0/1=35	1/1=3	rs5745687	PASS	0.0246	0.955,0.045	0.9802316,0.0197684	0.998,0.002	0.9553,0.0447	0.9985,0.0015	0.9433,0.0567	0.9928,0.0072	0.9802,0.01977	0.0683333333333333	5.78870285039557e-13	1.55431223447522e-15	0.0644290127662841	0	0.346188554176904	6.80722145318668e-12	3.02170288790649e-10	4.80282480452843e-13	1	0	1	3.44445405531246e-09
Sgsm1	SGSM1	chr22	25294369	G	A	MODERATE	0/0=273	0/1=26	1/1=1	rs2073201	PASS	0.0550	0.914,0.086	0.864816,0.135184	0.749,0.251	0.928,0.072	0.9153,0.0847	0.9622,0.0378	0.771,0.229	0.8648,0.1352	0.0466666666666667	6.39530348438766e-10	1.71518894037717e-25	0.0561610943307749	0.0029452528693206	0.386628846986678	8.08428878717383e-22	3.10172218992802e-07	5.91740184430124e-23	1	0.323977815625266	1	4.43019025537126e-19
Clip2	CLIP2	chr7	73814749	G	C	MODERATE	0/0=10	0/1=15	1/1=275	rs2522943	PASS	0.0117	0.01798353,0.982	0.011182,0.988818	0,1	0.0173,0.9827	0.00149999999999995,0.9985	0.0189,0.9811	0.0235,0.9765	0.01118,0.9888	0.941666666666667	5.6990402138893e-18	8.97776735937521e-15	8.34958419813649e-05	4.29646702229669e-17	2.2303148846649e-05	0.000356412453933725	3.11737499699745e-15	2.71128574253131e-12	0.0365711787878378	1.61976806740585e-14	0.0121024812304305	0.111200685627322
Micall2	MICALL2	chr7	1477981	A	C	MODERATE	0/0=287	0/1=12	1/1=1	rs11980797	PASS	0.1225	0.977,0.023	0.913738,0.086262	1,0	0.9712,0.0288	0.7065,0.2935	1,0	0.9755,0.0245	0.9137,0.08626	0.0233333333333333	7.29550308034358e-08		0.539746183027602	1.68110530484299e-41		0.883267309248536	3.17354383994946e-05	NA	1	7.11107543948585e-39	NA	1
Oas3	OAS3	chr12	113376388	G	A	MODERATE	0/0=110	0/1=77	1/1=99	rs1859330	PASS	0.0525	0.326,0.674	0.336861,0.663139	0.251,0.749	0.2781,0.7219	0.4463,0.5537	0.3698,0.6302	0.2853,0.7147	0.3369,0.6631	0.480769230769231	6.02043911269683e-18	5.53319072307996e-27	1.84574899943528e-18	0.00349617165989581	7.73067209578529e-09	3.69526245996749e-20	3.28715975553247e-15	1.93108356235491e-24	1.04284818468093e-15	0.377586539268747	4.35236838992712e-06	2.00652751576235e-17
Oas1a	OAS1	chr12	113357209	G	A	MODERATE	0/0=32	0/1=134	1/1=134	rs1131476	PASS	0.0545	0.284,0.716	0.21226,0.78774	0.255,0.745	0.2046,0.7954	0.0272,0.9728	0.3449,0.6551	0.2873,0.7127	0.2123,0.7877	0.67	6.66299954413585e-11	0.00124190878064907	3.20385472737263e-07	5.88575056321576e-79	0.541811742549568	0.0733134762018652	3.31817377297965e-08	0.166415776606975	0.00015923157995042	2.67801650626317e-76	1	1
Oas1g	OAS1	chr12	113357209	G	A	MODERATE	0/0=32	0/1=134	1/1=134	rs1131476	PASS	0.0545	0.284,0.716	0.21226,0.78774	0.255,0.745	0.2046,0.7954	0.0272,0.9728	0.3449,0.6551	0.2873,0.7127	0.2123,0.7877	0.67	6.66299954413585e-11	0.00124190878064907	3.20385472737263e-07	5.88575056321576e-79	0.541811742549568	0.0733134762018652	3.31817377297965e-08	0.166415776606975	0.00015923157995042	2.67801650626317e-76	1	1
Brat1	BRAT1	chr7	2582907	C	T	MODERATE	0/0=289	0/1=11	1/1=0	rs77213198	PASS	0.1095	0.951,0.049	0.9075479,0.0924521	0.7272,0.2728	0.9496,0.0504	0.9985,0.0015	0.9791,0.0209	0.8671,0.1329	0.9075,0.09245	0.0183333333333333	6.92930636029392e-10	4.16393826002108e-38	0.00188764515952355	2.98121208182067e-05	0.721889231600813	9.51731731006569e-15	3.35378427838226e-07	1.52816534142774e-35	0.739956902533232	0.00500843629745872	1	5.00610890509455e-12
Rbm19	RBM19	chr12	114377877	T	C	MODERATE	0/0=256	0/1=38	1/1=6	rs2290789	PASS	0.0505	0.869,0.131	0.801118,0.198882	0.8115,0.1885	0.9236,0.0764	0.6536,0.3464	0.8867,0.1133	0.8149,0.1851	0.8011,0.1989	0.0833333333333333	6.58133057873541e-12	1.0426496786429e-08	0.645903275546152	8.30159356725735e-34	0.0550234867757694	2.835951693352e-08	3.38280391747e-09	2.47107973838367e-06	1	3.42025654971003e-31	1	1.31304563402198e-05
Oas3	OAS3	chr12	113405328	G	A	MODERATE	0/0=282	0/1=18	1/1=0	rs61732395	PASS	0.0070	0.99,0.010	0.99580671,0.00419329	1,0	1,0	0.9992,0.0008	0.9851,0.0149	0.9949,0.0051	0.9958,0.004193	0.03	6.56141807553468e-13			2.13842543672627e-09	0.0390350188541664	6.13438622030227e-05	3.41849881735357e-10	NA	NA	5.94482271409903e-07	1	0.0211636324600428
Sod3	SOD3	chr4	24801315	G	A	MODERATE	0/0=202	0/1=18	1/1=47	rs2536512	PASS	0.1474	0.481,0.519	0.599441,0.400559	0.6409,0.3591	0.5403,0.4597	0.8601,0.1399	0.3748,0.6252	0.4775,0.5225	0.5994,0.4006	0.209737827715356	6.3278353208877e-18	1.46603589503583e-09	9.19616726351937e-20	0.000202950438554561	2.16345079995269e-54	3.48263572476588e-32	3.4486702498838e-15	3.63576901968886e-07	5.23261917294252e-17	0.0273983092048657	1.26994561957223e-51	1.93286282724506e-29
Tchp	TCHP	chr12	110352361	G	A	MODERATE	0/0=272	0/1=27	1/1=1	rs16940680	PASS	0.1124	0.936,0.064	0.862819,0.137181	0.9752,0.0248	0.9409,0.0591	0.6437,0.3563	0.9742,0.0258	0.8732,0.1268	0.8628,0.1372	0.0483333333333333	7.16020373199409e-10	0.0112938623032723	0.393256286075482	3.86744242406814e-46	0.0162601999338856	3.1626006781446e-07	3.45837840255315e-07	1	1	1.67073512719744e-43	1	0.000135991829160218
Acad12	ACAD10	chr12	112186274	C	T	MODERATE	0/0=275	0/1=24	1/1=1	rs34245489	PASS	0.0123	0.969,0.031	0.9864217,0.0135783	1,0	0.9813,0.0187	0.9992,0.0008	0.9662,0.0338	0.9796,0.0204	0.9864,0.01358	0.0433333333333333	8.09220326303262e-08		0.00972936781633438	2.22932783344731e-13	0.329785832458588	0.0085346456331461	3.51201621615616e-05	NA	1	7.64659446872427e-11	1	1
Acad10	ACAD10	chr12	112186274	C	T	MODERATE	0/0=275	0/1=24	1/1=1	rs34245489	PASS	0.0123	0.969,0.031	0.9864217,0.0135783	1,0	0.9813,0.0187	0.9992,0.0008	0.9662,0.0338	0.9796,0.0204	0.9864,0.01358	0.0433333333333333	8.09220326303262e-08		0.00972936781633438	2.22932783344731e-13	0.329785832458588	0.0085346456331461	3.51201621615616e-05	NA	1	7.64659446872427e-11	1	1
Slc5a6	SLC5A6	chr2	27424636	G	A	MODERATE	0/0=43	0/1=115	1/1=142	rs1395	PASS	0.1014	0.382,0.618	0.467452,0.532548	0.1508,0.8492	0.4755,0.5245	0.8374,0.1626	0.3072,0.6928	0.453,0.547	0.4675,0.5325	0.665	7.32958360671887e-10	6.11848670605873e-18	2.99485527932575e-07	0	0.246990891352844	3.66049276268043e-06	3.5328592984385e-07	1.96403423264485e-15	0.000149143792910422	0	1	0.00146053661230949
Tlr1	TLR1	chr4	38799710	T	C	MODERATE	0/0=160	0/1=99	1/1=41	rs4833095	PASS	0.1508	0.607,0.393	0.425319,0.574681	0.4008,0.5992	0.5274,0.4726	0.1203,0.8797	0.7197,0.2803	0.4877,0.5123	0.4253,0.5747	0.301666666666667	6.56740455991703e-37	7.93144838075206e-31	3.44983635203918e-10	1.29266828262123e-144	0.360463115438839	2.41773811262358e-16	3.73685319459279e-34	2.82359562354773e-28	1.82151359387669e-07	6.12724765962463e-142	1	1.29590762836624e-13
Gsap	GSAP	chr7	77035392	T	C	MODERATE	0/0=9	0/1=78	1/1=213	rs6949654	PASS	0.1430	0.147,0.853	0.0870610000000001,0.912939	0.0774,0.9226	0.1153,0.8847	0.0159,0.9841	0.1421,0.8579	0.1166,0.8834	0.08706,0.9129	0.84	8.32461405188626e-09	2.51549700457434e-07	0.0193344174194266	1.84523192958563e-34	0.329506656545133	0.0137473499112759	3.82099784981579e-06	5.38316358978909e-05	1	7.62080786918865e-32	1	1
Cenpc1	CENPC	chr4	68380070	C	T	MODERATE	0/0=261	0/1=38	1/1=1	rs1056787	PASS	0.0180	0.941,0.059	0.9752396,0.0247604	1,0	0.9481,0.0519	0.9955,0.0045	0.9245,0.0755	0.9939,0.0061	0.9752,0.02476	0.0666666666666667	8.55316173442588e-09		0.259961059486205	2.22044604925031e-16	0.508192909002751	3.78097553266343e-12	3.91734807436705e-06	NA	1	8.34887714518117e-14	1	1.91695459506036e-09
Emilin1	EMILIN1	chr2	27303755	A	G	MODERATE	0/0=72	0/1=4	1/1=219	rs2736976	PASS	0.0863	0.00898343000000001,0.991	0.03115,0.96885	0,1	0.0159,0.9841	0.1089,0.8911	0.001,0.999	0,1	0.03115,0.9688	0.749152542372881	6.8091850944342e-110	1.46891258606717e-62	3.7155835862957e-37	1.58041950794213e-15	1.33818476774583e-61	7.22987583987163e-61	3.9220906143941e-107	5.62593520463726e-60	2.17733198156928e-34	5.76853120398877e-13	7.88190828202294e-59	4.05596034616798e-58
Ankle2	ANKLE2	chr12	133306589	C	T	MODERATE	0/0=115	0/1=140	1/1=45	rs10781634	PASS	0.0564	0.661975174,0.338	0.752796,0.247204	0.8056,0.1944	0.7622,0.2378	0.9198,0.0802	0.5835,0.4165	0.6401,0.3599	0.7528,0.2472	0.383333333333333	7.60724816473157e-13	0	1.43743990044243e-08	0	0.190094100756415	0.348975373991348	3.95576904566042e-10	0	7.34531789126082e-06	0	1	1
Kmt2c	KMT2C	chr7	151949068	C	G	MODERATE	0/0=276	0/1=20	1/1=4	rs3735156	PASS	0.2187	0.924,0.076	0.819089,0.180911	0.9296,0.0704	0.8905,0.1095	0.5023,0.4977	0.9891,0.0109	0.908,0.092	0.8191,0.1809	0.0466666666666667	7.40077584178107e-17	0.0554632140567521	3.38242348864614e-05	1.55102145013762e-81	6.58811564369088e-06	0.000887889113075771	4.01122050624534e-14	1	0.0152547299337941	7.11918845613168e-79	0.00362346360402998	0.250384729887367
Hgfac	HGFAC	chr4	3446132	C	G	MODERATE	0/0=65	0/1=97	1/1=126	rs1987546	PASS	0.0726	0.302,0.698	0.265974,0.734026	0.0764,0.9236	0.2738,0.7262	0.3381,0.6619	0.2803,0.7197	0.3436,0.6564	0.266,0.734	0.605902777777778	8.50442392560296e-11	8.16750392621251e-54	5.50242227080216e-06	0.0190870358715266	3.1285408733862e-06	0.0454774677985173	4.21819426709907e-08	3.09548398803454e-51	0.00261365057863103	1	0.00173008310298257	1
Brat1	BRAT1	chr7	2578181	C	T	MODERATE	0/0=286	0/1=9	1/1=3	rs61627394	PASS	0.0725	0.945,0.055	0.883387,0.116613	0.7252,0.2748	0.9409,0.0591	0.9123,0.0877	0.9801,0.0199	0.8671,0.1329	0.8834,0.1166	0.0251677852348993	8.46371929996673e-12	5.81520262221146e-36	0.00287055410782326	5.02641216733559e-07	0.48584045871672	7.54215836795844e-13	4.324960562283e-09	2.12254895710718e-33	1	0.00011158635011485	1	3.86912724276268e-10
Zfp518b	ZNF518B	chr4	10447640	A	G	MODERATE	0/0=236	0/1=57	1/1=7	rs10016702	PASS	0.0696	0.874991764,0.125	0.789537,0.210463	0.8304,0.1696	0.8804,0.1196	0.5726,0.4274	0.9076,0.0924	0.8548,0.1452	0.7895,0.2105	0.118333333333333	1.00740565701707e-07	0.00542111169899508	0.944056082040916	1.29380521725027e-40	0.0968017551666105	0.129473287774659	4.35199243831374e-05	0.618006733685439	1	5.44691996462364e-38	1	1
Tnrc18	TNRC18	chr7	5352949	G	C	MODERATE	0/0=267	0/1=31	1/1=1	rs76882791	PASS	0.0459	0.923,0.077	0.861422,0.138578	0.8532,0.1468	0.7248,0.2752	0.9077,0.0923	0.8867,0.1133	0.8783,0.1217	0.8614,0.1386	0.0551839464882943	9.61635852817725e-09	1.98696205341973e-08	2.08848717983862e-25	0.00570127716190971	9.57594827702881e-05	1.42293339523207e-05	4.394675847377e-06	4.68923044607056e-06	1.20714558994672e-22	0.553023884705242	0.0511355637993338	0.0053644589000249
Fam175a	FAM175A	chr4	84383735	C	T	MODERATE	0/0=266	0/1=34	1/1=0	rs13125836	PASS	0.0211	0.958,0.042	0.9790335,0.0209665	1,0	0.9611,0.0389	0.9985,0.0015	0.9314,0.0686	0.9928,0.0072	0.979,0.02097	0.0566666666666667	1.06535190225188e-07		0.13262981984097	2.22044604925031e-16	0.345040484076927	2.05590389157351e-09	4.5916666987056e-05	NA	1	8.34887714518117e-14	1	9.88889771846858e-07
C530008M17Rik	KIAA1211	chr4	57181632	G	C	MODERATE	0/0=28	0/1=0	1/1=264	rs7672073	PASS	0.0795	0.00498332000000001,0.995	0.012979,0.987021	0,1	0.00429999999999997,0.9957	0.0469000000000001,0.9531	0,1	0,1	0.01298,0.987	0.904109589041096	8.0425820172383e-39	1.39051795404994e-23	7.62121088635623e-15	4.28865926315362e-05	1.53375913278592e-23	6.05503167469485e-23	4.59231433184307e-36	4.78338176193179e-21	4.22215083104135e-12	0.00673319504315118	8.92647815281405e-21	3.33632245275686e-20
Pmpcb	PMPCB	chr7	102939019	T	C	MODERATE	0/0=289	0/1=10	1/1=1	rs62622397	PASS	0.2223	0.976,0.024	0.9201278,0.0798722	1,0	0.9697,0.0303	0.7148,0.2852	0.998,0.002	1,0	0.9201,0.07987	0.02	1.08459402244547e-07		0.241373703483679	5.38923032204745e-41	0.000175205239165699		4.66375429651552e-05	NA	1	2.27425519590402e-38	0.0925083662794891	NA
Ep400	EP400	chr12	132445675	G	A	MODERATE	0/0=273	0/1=27	1/1=0	rs61745448	PASS	0.0151	0.974,0.026	0.9878195,0.0121805	1,0	0.9769,0.0231	0.9992,0.0008	0.9592,0.0408	0.9969,0.0031	0.9878,0.01218	0.045	9.79600400796699e-10		0.0284487647568017	7.061018436616e-14	0.68604440155145	3.35016725472315e-09	4.71187792783212e-07	NA	1	2.49960052656206e-11	1	1.59467961324822e-06
Letm1	LETM1	chr4	1843342	T	C	MODERATE	0/0=284	0/1=16	1/1=0	rs62623389	PASS	0.0142	0.984,0.016	0.99400958,0.00599042	1,0	0.9942,0.0058	0.9992,0.0008	0.9771,0.0229	0.998,0.002	0.994,0.00599	0.0266666666666667	1.11893956322717e-07		0.00242503893811952	2.10861528238127e-08	0.635378105700024	7.30081116029346e-06	4.80025072624456e-05	NA	0.926364874361657	5.41914127571986e-06	1	0.00281811310787328
Fam185a	FAM185A	chr7	102427889	C	T	MODERATE	0/0=193	0/1=94	1/1=13	rs116082009	PASS	0.0180	0.854,0.146	0.882188,0.117812	0.9881,0.0119	0.8458,0.1542	0.8593,0.1407	0.8052,0.1948	0.909,0.091	0.8822,0.1178	0.2	1.05824731200244e-08	0	0.0307619125184371	0.000992675541165777	0.799813947795889	5.61553692435268e-10	4.82560774273113e-06	0	1	0.122099091563391	1	2.73476648215976e-07
Fry	FRY	chr13	32811607	G	A	MODERATE	0/0=145	0/1=123	1/1=32	rs2806639	PASS	0.0515	0.719,0.281	0.784145,0.215855	0.996,0.004	0.7608,0.2392	0.6513,0.3487	0.6909,0.3091	0.8579,0.1421	0.7841,0.2159	0.311666666666667	1.1465011007239e-07	0	0.00351590435286253	0.111509414115952	0.914326570396044	6.66133814775094e-16	4.90702471109829e-05	0	1	1	1	3.530509218308e-13
Selplg	SELPLG	chr12	109017441	G	C	MODERATE	0/0=296	0/1=4	1/1=0	rs139943851		?	?	0.9285144,0.0714856	0.998,0.002	0.9784,0.0216	0.8177,0.1823	0.9722,0.0278	0.9264,0.0736	0.9285,0.07149	0.00666666666666667	1.0226245645756e-09	0.138227279519747	0.0259009482456817	1.03382186891727e-26	0.00335362282781412	1.64891600807563e-09	4.90859790996288e-07	1	1	4.1663021317366e-24	1	7.94777515892454e-07
Ncf1	NCF1	chr7	74193668	G	A	MODERATE	0/0=19	0/1=107	1/1=173	rs17856077	VQSRTrancheSNP99.80to99.90	-0.0033	0.46498289,0.535	0.36881,0.63119	0.4127,0.5873	0.3545,0.6455	0.4917,0.5083	0.2863,0.7137	0.2526,0.7474	0.3688,0.6312	0.75752508361204	1.05467323763264e-09	4.6029846600959e-12	1.24032463661994e-05	0	0.0558995703689795	0.651850717546885	5.05188480826035e-07	1.25201182754608e-09	0.00580471929938132	0	1	1
Mvk	MVK	chr12	110013879	G	A	MODERATE	0/0=218	0/1=72	1/1=10	rs7957619	PASS	0.0318	0.898,0.102	0.9241214,0.0758786	1,0	0.902,0.098	0.8971,0.1029	0.8529,0.1471	0.9714,0.0286	0.9241,0.07588	0.153333333333333	1.06323172488487e-10		0.00256735192176061	0.00153304588964409	0.734639102689015	0	5.26299703818011e-08	NA	0.973026378347271	0.179366369088359	1	0
Plb1	PLB1	chr2	28814033	A	G	MODERATE	0/0=214	0/1=74	1/1=12	rs11681826	PASS	0.0255	0.755,0.245	0.697284,0.302716	0.6994,0.3006	0.6816,0.3184	0.6188,0.3812	0.8101,0.1899	0.6963,0.3037	0.6973,0.3027	0.163333333333333	1.03096459525455e-12	7.60340067303969e-10	1.08634118669019e-10	1.38782113672847e-21	0.18002997857811	4.14831977596203e-10	5.35070624937111e-10	1.92366037027904e-07	5.80106193692561e-08	5.46801527871017e-19	1	2.02438005066947e-07
Zkscan14	ZNF394	chr7	99091172	G	A	MODERATE	0/0=280	0/1=20	1/1=0	rs138491865	PASS	0.0133	0.981,0.019	0.99201278,0.00798722	1,0	0.9885,0.0115	0.9992,0.0008	0.9781,0.0219	0.9908,0.0092	0.992,0.007987	0.0333333333333333	1.17935403665115e-08		0.007087226101675	2.16670237307426e-10	0.165010700017791	0.000530144152899759	5.35426732639622e-06	NA	1	6.47844009549204e-08	1	0.159043245869928
Tlr1	TLR1	chr4	38798648	C	A	MODERATE	0/0=137	0/1=103	1/1=60	rs5743618	PASS	0.3387	0.461,0.539	0.199481,0.800519	0.00600000000000001,0.994	0.2839,0.7161	0.0356,0.9644	0.673,0.327	0.0736,0.9264	0.1995,0.8005	0.371666666666667	9.38279767068794e-118	1.37287650878053e-176	1.65290447463432e-35	2.18704803771788e-185	0.0682642747497344	2.892936255807e-124	5.41387425598694e-115	5.49150603512212e-174	9.66949117661077e-33	1.04103486595371e-182	1	1.63161604827515e-121
Sh2b3	SH2B3	chr12	111884608	T	C	MODERATE	0/0=90	0/1=116	1/1=94	rs3184504	PASS	0.1623	0.338,0.662	0.147364,0.852636	0.003,0.997	0.2536,0.7464	0.0189,0.9811	0.4642,0.5358	0.0685,0.9315	0.1474,0.8526	0.506666666666667	9.56074785197417e-95	6.25157550991343e-132	4.11001206167464e-19	3.10263917469449e-147	0.258055855948484	2.12936223527322e-84	5.49743001488515e-92	2.48187547743563e-129	2.33037683896952e-16	1.47375360797988e-144	1	1.19883093845882e-81
Ccl24	CCL24	chr7	75442730	T	G	MODERATE	0/0=209	0/1=72	1/1=19	rs2302006	PASS	0.0802	0.724,0.276	0.653954,0.346046	0.4405,0.5595	0.5937,0.4063	0.7315,0.2685	0.8161,0.1839	0.6452,0.3548	0.654,0.346	0.183333333333333	1.07125436710217e-15	1.8244194655009e-49	3.20049660245004e-18	5.34220589497151e-05	0.977366976932752	3.10287360078862e-13	5.75263595133865e-13	6.82332880097337e-47	1.80508008378182e-15	0.00828041913720584	1	1.60418565160772e-10
Lmtk2	LMTK2	chr7	97821855	T	C	MODERATE	0/0=285	0/1=15	1/1=0	rs56204700	PASS	0.1634	0.916,0.084	0.871805,0.128195	0.626,0.374	0.8069,0.1931	0.9803,0.0197	0.9573,0.0427	0.9366,0.0634	0.8718,0.1282	0.025	1.10691210818546e-13	5.50019101842305e-56	3.49698701319621e-21	0.456399692604172	0.0657923391934643	0.00058818488232289	5.86663417338294e-11	2.09557277801918e-53	2.00027657154823e-18	1	1	0.174690910049898
Pigg	PIGG	chr4	515489	G	A	MODERATE	0/0=236	0/1=60	1/1=4	rs13115344	PASS	0.0380	0.862,0.138	0.796725,0.203275	0.7946,0.2054	0.9164,0.0836	0.6225,0.3775	0.8767,0.1233	0.8671,0.1329	0.7967,0.2033	0.113333333333333	1.37494335104717e-07	2.11832172995661e-06	0.0720187110411823	5.76140987957284e-32	0.551508072444337	0.254657327533049	5.87100810897142e-05	0.000418354425729179	1	2.36217805062486e-29	1	1
Oas1a	OAS1	chr12	113357442	G	A	MODERATE	0/0=27	0/1=139	1/1=134	rs2660	PASS	0.0635	0.291,0.709	0.21226,0.78774	0.255,0.745	0.2046,0.7954	0.0272,0.9728	0.3449,0.6551	0.2873,0.7127	0.2123,0.7877	0.678333333333333	1.24309493675786e-09	0.00397735149751688	1.63225465958851e-06	3.81941591524056e-76	0.34037148432444	0.148271210074495	5.94199379770257e-07	0.477282179702026	0.000791643509900427	1.73019540960397e-73	1	1
Oas1g	OAS1	chr12	113357442	G	A	MODERATE	0/0=27	0/1=139	1/1=134	rs2660	PASS	0.0635	0.291,0.709	0.21226,0.78774	0.255,0.745	0.2046,0.7954	0.0272,0.9728	0.3449,0.6551	0.2873,0.7127	0.2123,0.7877	0.678333333333333	1.24309493675786e-09	0.00397735149751688	1.63225465958851e-06	3.81941591524056e-76	0.34037148432444	0.148271210074495	5.94199379770257e-07	0.477282179702026	0.000791643509900427	1.73019540960397e-73	1	1
Mmp17	MMP17	chr12	132326298	G	A	MODERATE	0/0=217	0/1=73	1/1=10	rs35466884	PASS	0.0333	0.79998352,0.200	0.747604,0.252396	0.8343,0.1657	0.8401,0.1599	0.6823,0.3177	0.8131,0.1869	0.6135,0.3865	0.7476,0.2524	0.155	1.40939177881098e-07	0.573015052044637	0.80938358930828	7.89363017660125e-14	0.10359680046087	1.74098573329597e-22	6.00400897773477e-05	1	1	2.77066419198704e-11	1	9.55801167579488e-20
Aasdh	AASDH	chr4	57211352	T	C	MODERATE	0/0=233	0/1=62	1/1=5	rs12498340	PASS	0.0680	0.826,0.174	0.780152,0.219848	0.7827,0.2173	0.6225,0.3775	0.8026,0.1974	0.8698,0.1302	0.7669,0.2331	0.7802,0.2198	0.12	1.32576850225192e-08	9.52660164116312e-07	4.76802046775678e-26	3.2565403655662e-05	0.551778502157252	2.7224036293271e-08	6.0057313152012e-06	0.000195295333643844	2.76545187129893e-23	0.00527559539221724	1	1.26319528400777e-05
Tlr6	TLR6	chr4	38830350	A	G	MODERATE	0/0=48	0/1=106	1/1=146	rs5743810	PASS	0.1441	0.261,0.739	0.115216,0.884784	0,1	0.183,0.817	0.0165999999999999,0.9834	0.4085,0.5915	0.0174,0.9826	0.1152,0.8848	0.663333333333333	1.06442297015016e-49	2.12844435575912e-86	2.44329224218411e-10	2.58224658028205e-91	0.0041483705181915	6.16700453164735e-71	6.09914361896042e-47	8.36478631813334e-84	1.29494488835758e-07	1.20074465983115e-88	1	3.46585654678581e-68
Man2b2	MAN2B2	chr4	6610889	G	A	MODERATE	0/0=252	0/1=45	1/1=3	rs61733402	PASS	0.0270	0.933,0.067	0.9638578,0.0361422	0.999,0.001	0.9611,0.0389	0.9939,0.0061	0.9115,0.0885	0.9427,0.0573	0.9639,0.03614	0.085	1.35483642083045e-08	0	0.000511411548075769	0	0.80993156199986	0.0336491048519341	6.12386062215363e-06	0	0.211724380903368	0	1	1
Mlxip	MLXIP	chr12	122617989	A	G	MODERATE	0/0=147	0/1=99	1/1=53	rs7978353	PASS	0.0126	0.57591729,0.424	0.544129,0.455871	0.6419,0.3581	0.6066,0.3934	0.4887,0.5113	0.5258,0.4742	0.4928,0.5072	0.5441,0.4559	0.342809364548495	1.44287667008677e-07	0.535193172535878	0.0603774355267056	6.82905431791875e-12	2.64675033086431e-07	1.85975715591604e-10	6.13222584786877e-05	1	1	2.17163927309816e-09	0.000147423993429142	9.16860277866608e-08
Gigyf1	GIGYF1	chr7	100285476	C	T	MODERATE	0/0=285	0/1=12	1/1=3	rs77794375	PASS	0.3076	0.901,0.099	0.833067,0.166933	0.503,0.497	0.7176,0.2824	0.9758,0.0242	0.9891,0.0109	0.9018,0.0982	0.8331,0.1669	0.03	1.12550894645008e-18	1.33108574476361e-83	3.63596075807441e-34	0.459136086063282	0.00539576253886009	3.79141744684266e-07	6.16778902654644e-16	5.21785611947335e-81	2.12340108271546e-31	1	1	0.00016265180846955
Arap2	ARAP2	chr4	36189157	T	C	MODERATE	0/0=279	0/1=21	1/1=0	rs116105213	PASS	0.0206	0.986,0.014	0.99021565,0.00978435	1,0	0.9971,0.0029	0.9992,0.0008	0.9871,0.0129	0.9663,0.0337	0.9902,0.009784	0.035	1.4624708333244e-07		1.3193882522744e-05	6.89326373759513e-11	0.0029084744388721	0.890282072516952	6.20087633329546e-05	NA	0.0061483492555987	2.09555217622892e-08	1	1
Ptpn13	PTPN13	chr4	87692393	G	A	MODERATE	0/0=243	0/1=53	1/1=4	rs12500797	PASS	0.0277	0.921991728,0.078	0.9556709,0.0443291	0.9921,0.0079	0.9337,0.0663	0.9902,0.0098	0.8867,0.1133	0.9581,0.0419	0.9557,0.04433	0.101666666666667	1.33485555942059e-09	0	0.0212541143764362	0	0.469172013259646	2.76325860237847e-06	6.35391246284201e-07	0	1	0	1	0.0011163564753609
Lyar	LYAR	chr4	4276132	T	C	MODERATE	0/0=4	0/1=0	1/1=296	rs7376390	PASS	-0.0002	0,1.000	0.000399000000000038,0.999601	0,1	0,1	0.00149999999999995,0.9985	0,1	0,1	0.0003994,0.9996	0.986666666666667	1.27437137550997e-12	0.000237649869849875	0.00227794949844714	0.0008250535978631	0.000241057621225176	0.000294281461737462	6.60124372514164e-10	0.0356211120403919	0.877010556902149	0.103131699732888	0.126073135900767	0.0938757862942504
Tmem119	TMEM119	chr12	108985945	A	G	MODERATE	0/0=96	0/1=134	1/1=70	rs7975237	PASS	0.0779	0.475,0.525	0.344449,0.655551	0.1468,0.8532	0.5461,0.4539	0.2458,0.7542	0.5567,0.4433	0.32,0.68	0.3444,0.6556	0.456666666666667	1.19530917220864e-21	7.85947039935075e-64	0.920613192468428	2.35924580423967e-37	0.602323360190259	1.73186445864822e-18	6.61005972231378e-19	3.01803663335069e-61	1	9.86164746172182e-35	1	9.33474943211391e-16
Slc2a9	SLC2A9	chr4	9922170	C	G	MODERATE	0/0=283	0/1=15	1/1=2	rs73225891	PASS	0.0112	0.979,0.021	0.99341054,0.00658946	1,0	0.9971,0.0029	0.9992,0.0008	0.9712,0.0288	0.999,0.001	0.9934,0.006589	0.0316666666666667	1.39279543454052e-09		4.44927421978658e-05	6.80789202789356e-10	0.744070914872438	1.2275162353248e-07	6.61577831406747e-07	NA	0.019888255762446	1.97428868808913e-07	1	5.42562176013562e-05
Golga3	GOLGA3	chr12	133384864	G	A	MODERATE	0/0=174	0/1=107	1/1=19	rs3741486	PASS	0.0488	0.772,0.228	0.858027,0.141973	0.8264,0.1736	0.8429,0.1571	0.9894,0.0106	0.7187,0.2813	0.8671,0.1329	0.858,0.142	0.241666666666667	1.39363187656727e-10	0.000945010325356543	0.000133894346566077	0	0.0822336447033722	3.21499680211446e-08	6.88454147024231e-08	0.130411424899203	0.0570389916371488	0	1	1.47568353217054e-05
Helq	HELQ	chr4	84374692	A	G	MODERATE	0/0=280	0/1=17	1/1=3	rs17006837	PASS	0.3454	0.96,0.040	0.865216,0.134784	1,0	0.9669,0.0331	0.5106,0.4894	0.996,0.004	0.999,0.001	0.8652,0.1348	0.0383333333333333	1.35023231223354e-11		0.612042747623462	2.09065820477828e-82	2.28050346828823e-07	3.97604393853612e-09	6.88618479239105e-09	NA	1	9.63793432402787e-80	0.000127252093530483	1.88862087080466e-06
Zfp518b	ZNF518B	chr4	10447679	C	T	MODERATE	0/0=289	0/1=8	1/1=3	rs10007352	PASS	0.1407	0.95,0.050	0.85603,0.14397	0.8403,0.1597	0.9654,0.0346	0.6823,0.3177	0.997,0.003	0.8845,0.1155	0.856,0.144	0.0233333333333333	1.28850661993711e-16	2.02107273855855e-17	0.231340424754335	2.11227964404631e-46	0.000118196988162733	6.38963311014794e-11	6.97082081385977e-14	6.4068005812306e-15	1	9.16729365516099e-44	0.0627626007144112	3.16925802263338e-08
N4bp2	N4BP2	chr4	40103767	G	T	MODERATE	0/0=193	0/1=88	1/1=19	rs17511668	PASS	0.0423	0.801,0.199	0.886182,0.113818	0.9792,0.0208	0.745,0.255	0.9894,0.0106	0.7783,0.2217	0.862,0.138	0.8862,0.1138	0.21	1.45208289836773e-11	0	0.0566109810413049	0	0.582339669880183	0.000186109016309111	7.39110195269175e-09	0	1	0	1	0.0610437573493884
Tnrc18	TNRC18	chr7	5427720	A	G	MODERATE	0/0=62	0/1=2	1/1=208	rs4724663	PASS	0.0527	0.00600000000000001,0.994	0.000798999999999994,0.999201	0,1	0.00139999999999996,0.9986	0,1	0.003,0.997	0,1	0.0007987,0.9992	0.768382352941177	1.30485729552231e-250	3.31641538875415e-57	4.42777757574611e-40	2.17507235273159e-73	1.56967141905494e-54	1.19008147515226e-55	7.55512374107418e-248	1.26687067850409e-54	2.59910543696297e-37	9.74432414023752e-71	9.22966794404305e-52	6.65255544610113e-53
Usp42	USP42	chr7	6193464	T	G	MODERATE	0/0=281	0/1=11	1/1=4	rs61732616	PASS	0.0611	0.935,0.065	0.723043,0.276957	0.5645,0.4355	0.8314,0.1686	0.5764,0.4236	0.9105,0.0895	0.8149,0.1851	0.723,0.277	0.0320945945945946	1.34446975963959e-38	1.43047606986646e-66	2.12556734398045e-15	1.45624089034638e-66	1.10704446521753e-05	1.22680578702477e-18	7.66347762994566e-36	5.50733286898587e-64	1.17968987590915e-12	6.48027196204139e-64	0.00607767411404424	6.63701930780401e-16
Steap4	STEAP4	chr7	87913361	C	T	MODERATE	0/0=27	0/1=96	1/1=177	rs1981529	PASS	0.0273	0.222,0.778	0.148762,0.851238	0.0933,0.9067	0.2248,0.7752	0.00980000000000003,0.9902	0.2654,0.7346	0.2198,0.7802	0.1488,0.8512	0.75	1.56654908709577e-10	2.45454732727251e-17	0.287398909862705	1.05662763808039e-68	0.495906603756004	0.167230281353252	7.72308699938215e-08	7.75636955418113e-15	1	4.71255926583854e-66	1	1
Gbp4	GBP6	chr1	89846152	C	T	MODERATE	0/0=252	0/1=42	1/1=6	rs4582772	PASS	0.0403	0.934,0.066	0.9604633,0.0395367	1,0	0.9092,0.0908	0.9955,0.0045	0.8797,0.1203	0.9918,0.0082	0.9605,0.03954	0.09	1.71493017564472e-08		0.960091557921802	0	0.0594204165295958	4.44089209850063e-16	7.73433509215769e-06	NA	1	0	1	2.37143638059934e-13
Gbp8	GBP6	chr1	89846152	C	T	MODERATE	0/0=252	0/1=42	1/1=6	rs4582772	PASS	0.0403	0.934,0.066	0.9604633,0.0395367	1,0	0.9092,0.0908	0.9955,0.0045	0.8797,0.1203	0.9918,0.0082	0.9605,0.03954	0.09	1.71493017564472e-08		0.960091557921802	0	0.0594204165295958	4.44089209850063e-16	7.73433509215769e-06	NA	1	0	1	2.37143638059934e-13
Uvssa	UVSSA	chr4	1349029	G	A	MODERATE	0/0=263	0/1=30	1/1=7	rs2276904	PASS	0.1465	0.872991746,0.127	0.759585,0.240415	0.5754,0.4246	0.7118,0.2882	0.7209,0.2791	0.9692,0.0308	0.82,0.18	0.7596,0.2404	0.0733333333333333	1.43091608924707e-20	1.34376481989322e-50	6.61367066192651e-23	2.50278928088426e-24	9.29044371908994e-05	2.88693884701083e-09	7.87003849085889e-18	5.03911807459958e-48	3.79624695994582e-20	9.93607344511051e-22	0.0497038738971312	1.37706983002417e-06
Iqce	IQCE	chr7	2644519	C	T	MODERATE	0/0=156	0/1=122	1/1=22	rs2293404	PASS	0.0356	0.659,0.341	0.588259,0.411741	0.505,0.495	0.5375,0.4625	0.6044,0.3956	0.674,0.326	0.6002,0.3998	0.5883,0.4117	0.276666666666667	1.66399607194801e-10	8.09956753590802e-18	5.9448858458519e-12	4.69719049885022e-07	0.0382240872428897	6.74423750797287e-07	8.18686067398421e-08	2.59186161149057e-15	3.21618324260588e-09	0.00010474734812436	1	0.000287304517839644
Ncor2	NCOR2	chr12	124856830	C	T	MODERATE	0/0=287	0/1=12	1/1=1	rs142292731	PASS	0.0144	0.98392508,0.016	0.99580671,0.00419329	1,0	0.9899,0.0101	1,0	0.9871,0.0129	0.999,0.001	0.9958,0.004193	0.0233333333333333	1.84762547483786e-08		0.0603357792878949		0.115511311690299	8.9278863155684e-06	8.29583838202199e-06	NA	1	NA	1	0.0034193804588627
Clip1	CLIP1	chr12	122864920	G	A	MODERATE	0/0=287	0/1=12	1/1=1	rs34292795	PASS	0.0196	0.983,0.017	0.99580671,0.00419329	1,0	0.9971,0.0029	0.9992,0.0008	0.9821,0.0179	1,0	0.9958,0.004193	0.0233333333333333	1.84762547483786e-08		0.000914331942657443	2.07884894409816e-07	0.451041182277432		8.29583838202199e-06	NA	0.369390104833607	4.71898710310282e-05	1	NA
Sorcs2	SORCS2	chr4	7666180	C	A	MODERATE	0/0=281	0/1=19	1/1=0	rs35935435	PASS	0.0046	0.98697519,0.013	0.99400958,0.00599042	1,0	0.9885,0.0115	1,0	0.9801,0.0199	0.998,0.002	0.994,0.00599	0.0316666666666667	1.69987801612592e-10		0.0113466174258723		0.138448789947004	5.80441744890692e-07	8.34640105917827e-08	NA	1	NA	1	0.000248429066813216
Usp42	USP42	chr7	6194274	T	C	MODERATE	0/0=272	0/1=11	1/1=11	rs6463529	PASS	0.1532	0.723,0.277	0.528754,0.471246	0.2718,0.7282	0.7233,0.2767	0.3253,0.6747	0.829,0.171	0.6217,0.3783	0.5288,0.4712	0.0561224489795918	1.4651527369601e-82	3.70062782144839e-148	4.4181215159816e-25	1.27967353574689e-137	3.83767480936236e-11	2.75610301763179e-45	8.40997671015097e-80	1.47284987293646e-145	2.54925611472138e-22	6.04005908872532e-135	2.20666301538336e-08	1.53790548383854e-42
Evc2	EVC2	chr4	5624670	T	C	MODERATE	0/0=153	0/1=107	1/1=40	rs730469	PASS	0.1088	0.631,0.369	0.482428,0.517572	0.38,0.62	0.6037,0.3963	0.1225,0.8775	0.7445,0.2555	0.7188,0.2812	0.4824,0.5176	0.311666666666667	1.53156924042106e-21	5.74961206877098e-33	0.00153147572336799	4.44659303954091e-139	0.0149096690521091	0.196662014777867	8.45426220712425e-19	2.08135956889509e-30	0.606464386453724	2.10323850770285e-136	1	1
Usp42	USP42	chr7	6193521	G	C	MODERATE	0/0=278	0/1=5	1/1=13	rs61729726	PASS	0.1681	0.663,0.337	0.421925,0.578075	0.2669,0.7331	0.5879,0.4121	0.1362,0.8638	0.6918,0.3082	0.5726,0.4274	0.4219,0.5781	0.0523648648648649	1.48278469690815e-129	1.41653641267359e-152	2.46194253851729e-50	9.57122231608535e-249	1.84166311456925e-33	3.46633463000511e-57	8.57049554812911e-127	5.65198028656762e-150	1.44762221264817e-47	4.56547304477271e-246	1.07553125890844e-30	1.94114739280286e-54
Psapl1	PSAPL1	chr4	7435058	C	T	MODERATE	0/0=197	0/1=89	1/1=14	rs60816800	PASS	0.0576	0.918,0.082	0.896965,0.103035	0.9236,0.0764	0.8718,0.1282	0.9856,0.0144	0.8091,0.1909	0.8579,0.1421	0.897,0.103	0.195	1.72926117869565e-11	1.64712687933388e-12	0.0010548003193982	0	0.840205059642886	0.00565446033717421	8.7846467877739e-09	4.57901272454819e-10	0.42192012775928	0	1	1
Iqce	IQCE	chr7	2645552	A	G	MODERATE	0/0=158	0/1=121	1/1=21	rs2293407	PASS	0.0396	0.657,0.343	0.586062,0.413938	0.506,0.494	0.536,0.464	0.5991,0.4009	0.673,0.327	0.5971,0.4029	0.5861,0.4139	0.271666666666667	1.74527993453897e-11	1.8911234363503e-18	1.02307826305629e-12	4.5601794185398e-08	0.0199589765396265	1.18779473463314e-07	8.84856926811258e-09	6.12723993377497e-16	5.57577653365678e-10	1.11268377812371e-05	1	5.26193067442481e-05
Guf1	GUF1	chr4	44682465	T	C	MODERATE	0/0=47	0/1=155	1/1=98	rs6447368	PASS	0.0519	0.446,0.554	0.559704,0.440296	0.5982,0.4018	0.4798,0.5202	0.7103,0.2897	0.3986,0.6014	0.5389,0.4611	0.5597,0.4403	0.585	1.75082170983387e-11	1.09046105478683e-12	0.0194563738326163	0	0.517147540964334	1.76030586396259e-06	8.85915785175938e-09	3.04238634285526e-10	1	0	1	0.000714838022001674
Prr14l	PRR14L	chr22	32112461	T	C	MODERATE	0/0=183	0/1=99	1/1=18	rs140081	PASS	0.0603	0.731,0.269	0.652556,0.347444	0.8105,0.1895	0.6902,0.3098	0.4138,0.5862	0.7942,0.2058	0.6401,0.3599	0.6526,0.3474	0.225	1.87989861092058e-09	0.0868147829832333	0.000615919466974564	6.81516400418583e-49	0.363259500245753	1.78461639046746e-08	8.91071941576355e-07	1	0.25375882039352	2.97822666982921e-46	1	8.33415854348304e-06
Rbm19	RBM19	chr12	114383659	C	T	MODERATE	0/0=275	0/1=23	1/1=2	rs62621126		?	?	0.99021565,0.00978435	1,0	0.987,0.013	0.9977,0.0023	0.9692,0.0308	0.9939,0.0061	0.9902,0.009784	0.045	1.78701498043665e-12		0.000484087432779834	2.68385313972885e-12	0.140030869733039	1.56263876061047e-07	9.23886744885748e-10	NA	0.200896284603631	8.80303829831063e-10	1	6.89123693429217e-05
Ugt2b35	UGT2B7	chr4	69964338	T	C	MODERATE	0/0=91	0/1=143	1/1=66	rs7439366	PASS	0.0446	0.44,0.560	0.334864,0.665136	0.2748,0.7252	0.3199,0.6801	0.2269,0.7731	0.4851,0.5149	0.3988,0.6012	0.3349,0.6651	0.458333333333333	1.66343532016987e-23	1.08409959605334e-26	8.07157440610656e-16	2.00057534683219e-42	0.0282755405333112	3.12315389725697e-08	9.31523779295127e-21	3.77266659426562e-24	4.51201009301357e-13	8.52245097750513e-40	1	1.44289710053272e-05
Ugt2b5	UGT2B7	chr4	69964338	T	C	MODERATE	0/0=91	0/1=143	1/1=66	rs7439366	PASS	0.0446	0.44,0.560	0.334864,0.665136	0.2748,0.7252	0.3199,0.6801	0.2269,0.7731	0.4851,0.5149	0.3988,0.6012	0.3349,0.6651	0.458333333333333	1.66343532016987e-23	1.08409959605334e-26	8.07157440610656e-16	2.00057534683219e-42	0.0282755405333112	3.12315389725697e-08	9.31523779295127e-21	3.77266659426562e-24	4.51201009301357e-13	8.52245097750513e-40	1	1.44289710053272e-05
Ugt2b36	UGT2B7	chr4	69964338	T	C	MODERATE	0/0=91	0/1=143	1/1=66	rs7439366	PASS	0.0446	0.44,0.560	0.334864,0.665136	0.2748,0.7252	0.3199,0.6801	0.2269,0.7731	0.4851,0.5149	0.3988,0.6012	0.3349,0.6651	0.458333333333333	1.66343532016987e-23	1.08409959605334e-26	8.07157440610656e-16	2.00057534683219e-42	0.0282755405333112	3.12315389725697e-08	9.31523779295127e-21	3.77266659426562e-24	4.51201009301357e-13	8.52245097750513e-40	1	1.44289710053272e-05
Rbm33	RBM33	chr7	155531080	A	G	MODERATE	0/0=197	0/1=85	1/1=18	rs3735576	PASS	0.0811	0.744,0.256	0.634585,0.365415	0.6865,0.3135	0.719,0.281	0.2761,0.7239	0.8131,0.1869	0.8221,0.1779	0.6346,0.3654	0.201666666666667	1.75005160368762e-15	1.08660640973553e-06	0.000924589820583829	2.17588221602994e-101	0.467702919576446	0.23976478087704	9.38027659576564e-13	0.000220581101176313	0.372609697695283	1.01396111266995e-98	1	1
Naa25	NAA25	chr12	112477055	T	C	MODERATE	0/0=285	0/1=14	1/1=1	rs12231744	PASS	0.3679	0.914,0.086	0.833466,0.166534	0.4256,0.5744	0.8588,0.1412	0.9455,0.0545	0.997,0.003	0.9162,0.0838	0.8335,0.1665	0.0266666666666667	1.7436118253192e-19	2.77582483623832e-107	4.20105179909747e-13	0.00684198342875968	2.22063875787715e-05	4.97155020128847e-06	9.57242892100241e-17	1.09922663515037e-104	2.30217638590541e-10	0.64314644230341	0.0121024812304305	0.00197370542991152
Bmp3	BMP3	chr4	81967188	C	T	MODERATE	0/0=5	0/1=0	1/1=295	rs6831040	PASS	-0.0004	0,1.000	0.00119800000000003,0.998802	0,1	0,1	0.00449999999999995,0.9955	0,1	0,1	0.001198,0.9988	0.983333333333333	1.90459575056766e-11	3.92952111836282e-05	0.000639700080181557	0.00643758663672795	3.9993006881577e-05	5.11783577193794e-05	9.61820854036668e-09	0.00685698052484085	0.26291673295462	0.611570730489155	0.0215162377022884	0.0179636035595022
Sumf2	SUMF2	chr7	56136260	C	A	MODERATE	0/0=5	0/1=0	1/1=295	rs4245575	PASS	-0.0009	0.000991764000000006,0.999	0.00119800000000003,0.998802	0,1	0.00139999999999996,0.9986	0,1	0.005,0.995	0,1	0.001198,0.9988	0.983333333333333	1.90459575056766e-11	3.92952111836282e-05	0.00281866771834101	2.52343804971955e-06	0.0188237226921413	5.11783577193794e-05	9.61820854036668e-09	0.00685698052484085	1	0.00050721104799363	1	0.0179636035595022
Akap9	AKAP9	chr7	91714911	C	T	MODERATE	0/0=5	0/1=8	1/1=287	rs1063242	PASS	0.0122	0.004,0.996	0.00119800000000003,0.998802	0,1	0.00139999999999996,0.9986	0,1	0.003,0.997	0.002,0.998	0.001198,0.9988	0.97	1.73144389312139e-24	3.19993260131569e-08	1.96780236208824e-05	2.49460983318654e-10	4.10920566500255e-06	1.35145204140016e-06	9.73071467934221e-22	7.45584296106556e-06	0.00907156888922679	7.38404510623216e-08	0.00226828152708141	0.000555446789010094
Iqce	IQCE	chr7	2649777	C	T	MODERATE	0/0=220	0/1=74	1/1=6	rs1061566	PASS	0.0383	0.869,0.131	0.938099,0.061901	0.997,0.003	0.9135,0.0865	0.9947,0.0053	0.8658,0.1342	0.8926,0.1074	0.9381,0.0619	0.143333333333333	1.86739512741951e-13	0	0.00127257999811903	0	0.607261707005143	0.0336496315093031	9.87852022404921e-11	0	0.506486839251374	0	1	1
N4bp2	N4BP2	chr4	40138676	A	G	MODERATE	0/0=272	0/1=26	1/1=2	rs2271395	PASS	0.1387	0.914,0.086	0.871406,0.128594	0.6002,0.3998	0.9597,0.0403	0.9924,0.0076	0.9483,0.0517	0.8456,0.1544	0.8714,0.1286	0.05	2.21082303664437e-08	8.45098347053146e-53	0.40025191474464	1.63591740154345e-09	0.880987833956725	2.6550425095349e-10	9.88237897380033e-06	3.19447175186089e-50	1	4.59692789833709e-07	1	1.29831578716257e-07
Ep400	EP400	chr12	132549300	A	G	MODERATE	0/0=285	0/1=11	1/1=3	rs7136109	PASS	0.3814	0.956,0.044	0.848642,0.151358	1,0	0.9697,0.0303	0.4455,0.5545	0.996,0.004	1,0	0.8486,0.1514	0.0284280936454849	1.84349015390385e-16		0.842658024669147	4.09089045943288e-106	3.18873177254098e-05		9.95484683108079e-14	NA	1	1.91862762547402e-103	0.0172191515717213	NA
Rasa4	RASA4	chr7	102235769	T	C	MODERATE	0/0=227	0/1=56	1/1=17	rs144395384	VQSRTrancheSNP99.90to99.95	0.2378	0.876,0.124	?	?	?	?	?	?	?	0.15							NA	NA	NA	NA	NA	NA
Rasa4	RASA4	chr7	102246311	T	C	MODERATE	0/0=251	0/1=49	1/1=0	rs11547189	PASS	-0.1504	0.922,0.078	?	?	?	?	?	?	?	0.0816666666666667							NA	NA	NA	NA	NA	NA
Gtf2ird2	GTF2IRD2	chr7	74536808	T	C	MODERATE	0/0=300	0/1=0	1/1=0	rs150878403	VQSRTrancheSNP99.60to99.80	-0.0345	0.9992866,7.134e-04	?	?	?	?	?	?	?	0							NA	NA	NA	NA	NA	NA
Gtf2ird2	GTF2IRD2	chr7	74538966	C	T	MODERATE	0/0=300	0/1=0	1/1=0	rs200012926	VQSRTrancheSNP99.60to99.80	-0.0048	0.9997771,2.229e-04	?	?	?	?	?	?	?	0							NA	NA	NA	NA	NA	NA
Gtf2ird2	GTF2IRD2	chr7	74542147	G	A	MODERATE	0/0=297	0/1=3	1/1=0	rs201207883		?	?	?	?	?	?	?	?	?	0.005							NA	NA	NA	NA	NA	NA
Chek2	CHEK2	chr22	29091840	T	C	MODERATE	0/0=300	0/1=0	1/1=0	rs142470496	VQSRTrancheSNP99.80to99.90	-0.0381	0.974,0.026	?	?	?	?	?	?	?	0							NA	NA	NA	NA	NA	NA
Rest	REST	chr4	57797265	A	G	MODERATE	0/0=297	0/1=3	1/1=0	rs144031960		?	?	?	?	?	?	?	?	?	0.005							NA	NA	NA	NA	NA	NA
Fam185a	FAM185A	chr7	102389833	G	C	MODERATE	0/0=83	0/1=0	1/1=203	rs28695887	PASS	0.2174	0.00764880000000001,0.992	?	?	?	?	?	?	?	0.70979020979021							NA	NA	NA	NA	NA	NA
Fam185a	FAM185A	chr7	102417753	T	G	MODERATE	0/0=265	0/1=35	1/1=0	rs201667800	PASS	-0.1628	0.882,0.118	?	?	?	?	?	?	?	0.0583333333333333							NA	NA	NA	NA	NA	NA
Pilra	PILRB	chr7	99956444	A	G	MODERATE	0/0=291	0/1=3	1/1=6	rs11761306	VQSRTrancheSNP99.60to99.80	0.0626	0.997073565,2.918e-03	?	?	?	?	?	?	?	0.025							NA	NA	NA	NA	NA	NA
Pilra	PILRB	chr7	99956564	G	A	MODERATE	0/0=300	0/1=0	1/1=0	rs748895668	VQSRTrancheSNP99.80to99.90	-0.0000	0.99998353,1.647e-05	?	?	?	?	?	?	?	0							NA	NA	NA	NA	NA	NA
Gtf2i	GTF2I	chr7	74148279	A	G	MODERATE	0/0=300	0/1=0	1/1=0	rs781917884	VQSRTrancheSNP99.80to99.90	-0.0002	0.99997529,2.471e-05	?	?	?	?	?	?	?	0							NA	NA	NA	NA	NA	NA
Steap1	STEAP1	chr7	89790175	C	G	MODERATE	0/0=299	0/1=1	1/1=0	rs4015375	VQSRTrancheSNP99.60to99.80	-0.0038	0.997134,2.866e-03	?	?	?	?	?	?	?	0.00166666666666667							NA	NA	NA	NA	NA	NA
Steap1	STEAP1	chr7	89790177	A	G	MODERATE	0/0=298	0/1=2	1/1=0	rs200418160	VQSRTrancheSNP99.80to99.90	-0.0037	0.997282,2.718e-03	?	?	?	?	?	?	?	0.00333333333333333							NA	NA	NA	NA	NA	NA
Steap1	STEAP1	chr7	89790392	A	G	MODERATE	0/0=300	0/1=0	1/1=0	rs200347858	VQSRTrancheSNP99.60to99.80	-0.0029	0.9991022,8.978e-04	?	?	?	?	?	?	?	0							NA	NA	NA	NA	NA	NA
Steap1	STEAP1	chr7	89790570	G	C	MODERATE	0/0=300	0/1=0	1/1=0	rs760734771	VQSRTrancheSNP99.60to99.80	-0.0010	0.9998765,1.235e-04	?	?	?	?	?	?	?	0							NA	NA	NA	NA	NA	NA
Steap1	STEAP1	chr7	89790588	G	T	MODERATE	0/0=300	0/1=0	1/1=0	rs61737480	VQSRTrancheSNP99.60to99.80	-0.0009	0.9996952,3.048e-04	?	?	?	?	?	?	?	0							NA	NA	NA	NA	NA	NA
Steap1	STEAP1	chr7	89791240	A	G	MODERATE	0/0=300	0/1=0	1/1=0	rs199817828	VQSRTrancheSNP99.90to99.95	-0.0017	0.9998188,1.812e-04	?	?	?	?	?	?	?	0							NA	NA	NA	NA	NA	NA
Pom121	POM121	chr7	72412427	G	A	MODERATE	0/0=300	0/1=0	1/1=0	rs201876140	PASS	-0.1588	0.94,0.060	?	?	?	?	?	?	?	0							NA	NA	NA	NA	NA	NA
Pom121	POM121	chr7	72412591	G	A	MODERATE	0/0=287	0/1=12	1/1=1	rs201184041	VQSRTrancheSNP99.60to99.80	0.0340	0.99991756,8.244e-05	?	?	?	?	?	?	?	0.0233333333333333							NA	NA	NA	NA	NA	NA
Pom121	POM121	chr7	72412760	C	T	MODERATE	0/0=297	0/1=3	1/1=0	rs140024606	VQSRTrancheSNP99.60to99.80	-0.0465	0.967,0.033	?	?	?	?	?	?	?	0.005							NA	NA	NA	NA	NA	NA
Pom121	POM121	chr7	72412783	A	T	MODERATE	0/0=287	0/1=13	1/1=0	rs200902059	VQSRTrancheSNP99.60to99.80	-0.0005	0.998221,1.779e-03	?	?	?	?	?	?	?	0.0216666666666667							NA	NA	NA	NA	NA	NA
Pom121	POM121	chr7	72413036	C	T	MODERATE	0/0=293	0/1=7	1/1=0	rs781908395	VQSRTrancheSNP99.60to99.80	-0.0873	0.998193,1.807e-03	?	?	?	?	?	?	?	0.0116666666666667							NA	NA	NA	NA	NA	NA
Pom121	POM121	chr7	72413243	A	C	MODERATE	0/0=296	0/1=1	1/1=2	rs437678	PASS	0.3412	0.982,0.018	?	?	?	?	?	?	?	0.00836120401337793							NA	NA	NA	NA	NA	NA
Pom121	POM121	chr7	72413389	G	C	MODERATE	0/0=300	0/1=0	1/1=0	rs62463428	VQSRTrancheSNP99.60to99.80	-0.0236	0.990156,9.844e-03	?	?	?	?	?	?	?	0							NA	NA	NA	NA	NA	NA
Pom121	POM121	chr7	72413423	C	T	MODERATE	0/0=255	0/1=45	1/1=0	rs71554686	PASS	-0.1543	0.852,0.148	?	?	?	?	?	?	?	0.075							NA	NA	NA	NA	NA	NA
Pom121	POM121	chr7	72413443	G	A	MODERATE	0/0=84	0/1=208	1/1=8	rs62463429	InbreedingCoeff_Filter	-0.6982	0.559,0.441	?	?	?	?	?	?	?	0.373333333333333							NA	NA	NA	NA	NA	NA
Pom121	POM121	chr7	72413494	G	A	MODERATE	0/0=297	0/1=3	1/1=0	rs141024045	VQSRTrancheSNP99.80to99.90	-0.0056	0.989,0.011	?	?	?	?	?	?	?	0.005							NA	NA	NA	NA	NA	NA
Pom121	POM121	chr7	72413581	G	A	MODERATE	0/0=161	0/1=139	1/1=0	rs71554687	InbreedingCoeff_Filter	-0.4451	0.692,0.308	?	?	?	?	?	?	?	0.231666666666667							NA	NA	NA	NA	NA	NA
Pom121	POM121	chr7	72413593	T	C	MODERATE	0/0=162	0/1=138	1/1=0	rs71554688	InbreedingCoeff_Filter	-0.5978	0.627,0.373	?	?	?	?	?	?	?	0.23							NA	NA	NA	NA	NA	NA
Pom121	POM121	chr7	72413896	A	G	MODERATE	0/0=300	0/1=0	1/1=0	rs201049716	VQSRTrancheSNP99.80to99.90	0.0015	0.99411,5.890e-03	?	?	?	?	?	?	?	0							NA	NA	NA	NA	NA	NA
Iqce	IQCE	chr7	2649704	T	G	MODERATE	0/0=130	0/1=118	1/1=52	rs3735109	PASS	0.0396	0.54498347,0.455	?	?	?	?	?	?	?	0.37							NA	NA	NA	NA	NA	NA
Tyw1	TYW1	chr7	66660242	A	G	MODERATE	0/0=226	0/1=51	1/1=23	rs2949097	VQSRTrancheSNP99.80to99.90	0.0332	0.789991761,0.210	?	?	?	?	?	?	?	0.161666666666667							NA	NA	NA	NA	NA	NA
Kmt2c	KMT2C	chr7	151882672	C	A	MODERATE	0/0=296	0/1=4	1/1=0	rs145848316		?	?	?	?	?	?	?	?	?	0.00666666666666667							NA	NA	NA	NA	NA	NA
Kmt2c	KMT2C	chr7	151919690	C	T	MODERATE	0/0=300	0/1=0	1/1=0	rs4024339		?	?	?	?	?	?	?	?	?	0							NA	NA	NA	NA	NA	NA
Kmt2c	KMT2C	chr7	151919751	A	G	MODERATE	0/0=300	0/1=0	1/1=0	rs200559566		?	?	?	?	?	?	?	?	?	0							NA	NA	NA	NA	NA	NA
Kmt2c	KMT2C	chr7	151921114	A	T	HIGH	0/0=300	0/1=0	1/1=0	rs4024337		?	?	?	?	?	?	?	?	?	0							NA	NA	NA	NA	NA	NA
Kmt2c	KMT2C	chr7	151927016	T	C	MODERATE	0/0=300	0/1=0	1/1=0	rs141049734	PASS	-0.1148	0.902,0.098	?	?	?	?	?	?	?	0							NA	NA	NA	NA	NA	NA
Kmt2c	KMT2C	chr7	151927021	C	A	MODERATE	0/0=23	0/1=275	1/1=2	rs28522267	PASS	-0.1168	0.89497486,0.105	?	?	?	?	?	?	?	0.465							NA	NA	NA	NA	NA	NA
Kmt2c	KMT2C	chr7	151927025	A	G	MODERATE	0/0=162	0/1=138	1/1=0	rs183684706	InbreedingCoeff_Filter	-0.8132	0.559,0.441	?	?	?	?	?	?	?	0.23							NA	NA	NA	NA	NA	NA
Kmt2c	KMT2C	chr7	151932916	C	G	MODERATE	0/0=300	0/1=0	1/1=0	rs111791757	InbreedingCoeff_Filter	-0.4079	0.721,0.279	?	?	?	?	?	?	?	0							NA	NA	NA	NA	NA	NA
Kmt2c	KMT2C	chr7	151932945	C	T	MODERATE	0/0=289	0/1=11	1/1=0	rs199504848	PASS	-0.1362	0.908,0.092	?	?	?	?	?	?	?	0.0183333333333333							NA	NA	NA	NA	NA	NA
Kmt2c	KMT2C	chr7	151932949	C	A	MODERATE	0/0=300	0/1=0	1/1=0	rs148983031	PASS	-0.0056	0.996589,3.411e-03	?	?	?	?	?	?	?	0							NA	NA	NA	NA	NA	NA
Kmt2c	KMT2C	chr7	151932961	G	A	HIGH	0/0=300	0/1=0	1/1=0	rs200662726	VQSRTrancheSNP99.80to99.90	-0.0475	0.948991757,0.051	?	?	?	?	?	?	?	0							NA	NA	NA	NA	NA	NA
Kmt2c	KMT2C	chr7	151932982	G	A	HIGH	0/0=300	0/1=0	1/1=0	rs772146328	VQSRTrancheSNP99.80to99.90	-0.0118	0.98399176,0.016	?	?	?	?	?	?	?	0							NA	NA	NA	NA	NA	NA
Kmt2c	KMT2C	chr7	151932985	G	A	MODERATE	0/0=300	0/1=0	1/1=0	rs747577575	VQSRTrancheSNP99.80to99.90	-0.0023	0.9997693,2.307e-04	?	?	?	?	?	?	?	0							NA	NA	NA	NA	NA	NA
Kmt2c	KMT2C	chr7	151932990	C	T	MODERATE	0/0=300	0/1=0	1/1=0	rs76844681	VQSRTrancheSNP99.60to99.80	-0.0327	0.988,0.012	?	?	?	?	?	?	?	0							NA	NA	NA	NA	NA	NA
Kmt2c	KMT2C	chr7	151932991	G	A	MODERATE	0/0=300	0/1=0	1/1=0	rs759973306	VQSRTrancheSNP99.80to99.90	-0.0170	0.979,0.021	?	?	?	?	?	?	?	0							NA	NA	NA	NA	NA	NA
Kmt2c	KMT2C	chr7	151932997	C	T	MODERATE	0/0=296	0/1=4	1/1=0	rs199831680	InbreedingCoeff_Filter	-0.3342	0.758,0.242	?	?	?	?	?	?	?	0.00666666666666667							NA	NA	NA	NA	NA	NA
Kmt2c	KMT2C	chr7	151933014	C	T	MODERATE	0/0=296	0/1=4	1/1=0	rs112773078	VQSRTrancheSNP99.60to99.80	-0.0050	0.998978,1.022e-03	?	?	?	?	?	?	?	0.00666666666666667							NA	NA	NA	NA	NA	NA
Kmt2c	KMT2C	chr7	151935799	A	G	MODERATE	0/0=300	0/1=0	1/1=0	rs199839047		?	?	?	?	?	?	?	?	?	0							NA	NA	NA	NA	NA	NA
Kmt2c	KMT2C	chr7	151935853	T	C	MODERATE	0/0=206	0/1=94	1/1=0	rs4024420	VQSRTrancheSNP99.80to99.90	-0.2073	0.872,0.128	?	?	?	?	?	?	?	0.156666666666667							NA	NA	NA	NA	NA	NA
Kmt2c	KMT2C	chr7	151935910	C	T	MODERATE	0/0=277	0/1=23	1/1=0	rs4024419	PASS	-0.0961	0.942,0.058	?	?	?	?	?	?	?	0.0383333333333333							NA	NA	NA	NA	NA	NA
Kmt2c	KMT2C	chr7	151945007	C	T	MODERATE	0/0=43	0/1=257	1/1=0	rs137949498	InbreedingCoeff_Filter	-0.9722	0.507,0.493	?	?	?	?	?	?	?	0.428333333333333							NA	NA	NA	NA	NA	NA
Kmt2c	KMT2C	chr7	151945204	G	A	MODERATE	0/0=6	0/1=294	1/1=0	rs4024453	InbreedingCoeff_Filter	-0.8973	0.52,0.480	?	?	?	?	?	?	?	0.49							NA	NA	NA	NA	NA	NA
Kmt2c	KMT2C	chr7	151945225	T	C	MODERATE	0/0=300	0/1=0	1/1=0	rs202098135	VQSRTrancheSNP99.80to99.90	-0.0444	0.968,0.032	?	?	?	?	?	?	?	0							NA	NA	NA	NA	NA	NA
Kmt2c	KMT2C	chr7	151945228	G	A	MODERATE	0/0=300	0/1=0	1/1=0	rs200184971	VQSRTrancheSNP99.80to99.90	-0.0005	0.998682,1.318e-03	?	?	?	?	?	?	?	0							NA	NA	NA	NA	NA	NA
Kmt2c	KMT2C	chr7	151945256	G	A	HIGH	0/0=300	0/1=0	1/1=0	rs201234598	VQSRTrancheSNP99.80to99.90	-0.0736	0.96,0.040	?	?	?	?	?	?	?	0							NA	NA	NA	NA	NA	NA
Kmt2c	KMT2C	chr7	151945291	G	A	MODERATE	0/0=300	0/1=0	1/1=0	rs763642306	VQSRTrancheSNP99.80to99.90	-0.0015	0.9997776,2.224e-04	?	?	?	?	?	?	?	0							NA	NA	NA	NA	NA	NA
Kmt2c	KMT2C	chr7	151945330	G	T	MODERATE	0/0=300	0/1=0	1/1=0	rs200264581	VQSRTrancheSNP99.80to99.90	0.0024	0.998772763,1.219e-03	?	?	?	?	?	?	?	0							NA	NA	NA	NA	NA	NA
Kmt2c	KMT2C	chr7	151945334	T	C	MODERATE	0/0=298	0/1=2	1/1=0	rs4639425	VQSRTrancheSNP99.80to99.90	-0.0659	0.955,0.045	?	?	?	?	?	?	?	0.00333333333333333							NA	NA	NA	NA	NA	NA
Kmt2c	KMT2C	chr7	151962134	G	T	HIGH	0/0=300	0/1=0	1/1=0	rs146238849	VQSRTrancheSNP99.60to99.80	-0.0270	0.96894235,0.031	?	?	?	?	?	?	?	0							NA	NA	NA	NA	NA	NA
Kmt2c	KMT2C	chr7	151962168	C	A	MODERATE	0/0=300	0/1=0	1/1=0	rs138908625	VQSRTrancheSNP99.60to99.80	-0.0212	0.97197529,0.028	?	?	?	?	?	?	?	0							NA	NA	NA	NA	NA	NA
Kmt2c	KMT2C	chr7	151962265	C	T	MODERATE	0/0=300	0/1=0	1/1=0	rs201834857	PASS	-0.1202	0.898,0.102	?	?	?	?	?	?	?	0							NA	NA	NA	NA	NA	NA
Kmt2c	KMT2C	chr7	151962290	C	G	MODERATE	0/0=300	0/1=0	1/1=0	rs775803041	VQSRTrancheSNP99.80to99.90	-0.0087	0.996483,3.517e-03	?	?	?	?	?	?	?	0							NA	NA	NA	NA	NA	NA
Kmt2c	KMT2C	chr7	151962294	G	A	MODERATE	0/0=300	0/1=0	1/1=0	rs763762478	VQSRTrancheSNP99.80to99.90	-0.0011	0.998229,1.771e-03	?	?	?	?	?	?	?	0							NA	NA	NA	NA	NA	NA
Kmt2c	KMT2C	chr7	151962296	T	C	HIGH	0/0=300	0/1=0	1/1=0	rs751158858	VQSRTrancheSNP99.80to99.90	-0.0019	0.998377,1.623e-03	?	?	?	?	?	?	?	0							NA	NA	NA	NA	NA	NA
Kmt2c	KMT2C	chr7	151970856	T	A	MODERATE	0/0=5	0/1=1	1/1=294	rs10454320	InbreedingCoeff_Filter	-0.8905	0.469,0.531	?	?	?	?	?	?	?	0.981666666666667							NA	NA	NA	NA	NA	NA
Kmt2c	KMT2C	chr7	151970858	C	T	MODERATE	0/0=300	0/1=0	1/1=0	.		?	?	?	?	?	?	?	?	?	0							NA	NA	NA	NA	NA	NA
Kmt2c	KMT2C	chr7	151970877	G	A	MODERATE	0/0=298	0/1=2	1/1=0	rs138627563	PASS	-0.1448	0.896,0.104	?	?	?	?	?	?	?	0.00333333333333333							NA	NA	NA	NA	NA	NA
Kmt2c	KMT2C	chr7	151970945	G	T	MODERATE	0/0=300	0/1=0	1/1=0	rs779424402	VQSRTrancheSNP99.60to99.80	0.0028	0.99991763,8.237e-05	?	?	?	?	?	?	?	0							NA	NA	NA	NA	NA	NA
Kmt2c	KMT2C	chr7	151970951	C	T	MODERATE	0/0=300	0/1=0	1/1=0	rs201009236	VQSRTrancheSNP99.60to99.80	-0.0340	0.979,0.021	?	?	?	?	?	?	?	0							NA	NA	NA	NA	NA	NA
Ncf1	NCF1	chr7	74193642	G	A	MODERATE	0/0=265	0/1=35	1/1=0	rs201802880	VQSRTrancheSNP99.80to99.90	0.0158	0.998595,1.405e-03	?	?	?	?	?	?	?	0.0583333333333333							NA	NA	NA	NA	NA	NA
Kmt2c	KMT2C	chr7	151970859	C	A,T	MODERATE	0/0=300	0/1=0	1/1=0	rs149992209	PASS	-0.0538	0.914907,9.093e-03,0.076	?	?	?	?	?	?	?	0,0							NA,NA	NA,NA	NA,NA	NA,NA	NA,NA	NA,NA

## Sheet: Supplementary Table 7
Supplementary Table 7: PWD polymorphisms on chr5 in genes that are expressed in the intestine and/or in adenoma
chr	pos	Black6	PWD	effect	type	gene	AAchange
chr5	3519360	A	G	MODERATE	missense_variant&splice_region_variant	Cdk6	p.Ile234Val
chr5	3519394	G	C	MODERATE	missense_variant	Cdk6	p.Arg245Thr
chr5	3596171	T	C	MODERATE	missense_variant	Rbm48	p.Asn11Ser
chr5	3605847	A	G	MODERATE	missense_variant	Pex1	p.Ile225Val
chr5	3610185	G	A	MODERATE	missense_variant	Pex1	p.Arg496Lys
chr5	3612898	G	C	MODERATE	missense_variant	Pex1	p.Met536Ile
chr5	3622386	C	A	MODERATE	missense_variant&splice_region_variant	Pex1	p.Pro743Gln
chr5	3693361	A	T	MODERATE	missense_variant	Ankib1	p.Ser891Thr
chr5	3693382	T	C	MODERATE	missense_variant	Ankib1	p.Thr884Ala
chr5	3819402	C	A	MODERATE	missense_variant	Krit1	p.Asp413Glu
chr5	3822208	G	A	MODERATE	missense_variant	Krit1	p.Arg459Gln
chr5	3831504	C	A	MODERATE	missense_variant	Krit1	p.Thr580Asn
chr5	3948861	C	G	MODERATE	missense_variant	Akap9	p.Pro77Ala
chr5	3960242	C	G	MODERATE	missense_variant	Akap9	p.Thr315Ser
chr5	3960289	A	G	MODERATE	missense_variant	Akap9	p.Asn331Asp
chr5	3960628	A	G	MODERATE	missense_variant	Akap9	p.Ile444Val
chr5	3960704	A	G	MODERATE	missense_variant	Akap9	p.Gln469Arg
chr5	3961160	G	T	MODERATE	missense_variant	Akap9	p.Gly621Val
chr5	3962160	ACTCCTCG	CCTCCTCA	MODERATE	missense_variant	Akap9	p.GluLeuLeuAla954AspLeuLeuThr
chr5	3962246	A	T	MODERATE	missense_variant	Akap9	p.Lys983Met
chr5	3968775	T	G	MODERATE	missense_variant	Akap9	p.Phe1119Val
chr5	3970702	C	A	MODERATE	missense_variant	Akap9	p.Gln1138Lys
chr5	3975620	G	A	MODERATE	missense_variant	Akap9	p.Gly1231Ser
chr5	3975705	GCAC	G	MODERATE	disruptive_inframe_deletion&splice_region_variant	Akap9	p.Ser1259_Thr1260delinsArg
chr5	4003777	G	A	MODERATE	missense_variant	Akap9	p.Ala1581Thr
chr5	4014075	C	G	MODERATE	missense_variant	Akap9	p.Thr1808Ser
chr5	4034826	G	C	MODERATE	missense_variant	Akap9	p.Val2039Leu
chr5	4046064	A	C	MODERATE	missense_variant	Akap9	p.Glu2313Ala
chr5	4046411	A	G	MODERATE	missense_variant	Akap9	p.Lys2429Glu
chr5	4046436	A	G	MODERATE	missense_variant	Akap9	p.Gln2437Arg
chr5	4046694	T	C	MODERATE	missense_variant	Akap9	p.Ile2523Thr
chr5	4046778	G	A	MODERATE	missense_variant	Akap9	p.Arg2551His
chr5	4046866	A	G	MODERATE	missense_variant	Akap9	p.Ile2580Met
chr5	4046894	G	A	MODERATE	missense_variant	Akap9	p.Glu2590Lys
chr5	4046930	C	T	MODERATE	missense_variant	Akap9	p.Arg2602Trp
chr5	4050348	C	T	MODERATE	missense_variant	Akap9	p.Thr2670Ile
chr5	4050368	G	A	MODERATE	missense_variant	Akap9	p.Gly2677Ser
chr5	4050416	G	A	MODERATE	missense_variant	Akap9	p.Asp2693Asn
chr5	4058469	C	A	MODERATE	missense_variant	Akap9	p.Gln2958Lys
chr5	4061257	ACCACGAGGG	GCCACGAGGA	MODERATE	missense_variant	Akap9	p.HisHisGluGly3106ArgHisGluGlu
chr5	4070455	T	C	MODERATE	missense_variant	Akap9	p.Ser3624Pro
chr5	4077230	C	G	MODERATE	missense_variant	Akap9	p.Gln3693Glu
chr5	4077936	GCTGAG	ACTGAA	MODERATE	missense_variant	Akap9	p.AlaLeuArg3757AlaLeuLys
chr5	4103012	ATG	GTA	MODERATE	missense_variant	Cyp51	p.His63Tyr
chr5	4756828	ACCG	A	MODERATE	disruptive_inframe_deletion	Fzd1	p.Gly251del
chr5	5539311	C	T	MODERATE	missense_variant	Gtpbp10	p.Gly348Ser
chr5	5542352	T	C	MODERATE	missense_variant	Gtpbp10	p.Asp284Gly
chr5	5736658	C	G	MODERATE	missense_variant	Steap1	p.Val260Leu
chr5	7975454	A	G	MODERATE	missense_variant	Steap4	p.His5Arg
chr5	7975724	A	G	MODERATE	missense_variant	Steap4	p.Tyr95Cys
chr5	7975763	G	A	MODERATE	missense_variant	Steap4	p.Arg108His
chr5	7975820	G	A	MODERATE	missense_variant	Steap4	p.Gly127Glu
chr5	7976530	AAGAGTA	CAGAGTG	MODERATE	missense_variant	Steap4	p.GlnArgVal164HisArgVal
chr5	7976672	GTCTTC	ATCTTT	MODERATE	missense_variant	Steap4	p.ValPhe212IlePhe
chr5	7976720	G	A	MODERATE	missense_variant	Steap4	p.Val228Met
chr5	7978418	A	G	MODERATE	missense_variant	Steap4	p.Asn332Ser
chr5	8397585	A	G	MODERATE	missense_variant	Dbf4	p.Cys542Arg
chr5	8397878	T	C	MODERATE	missense_variant	Dbf4	p.Tyr444Cys
chr5	8403616	G	A	MODERATE	missense_variant	Dbf4	p.Leu269Phe
chr5	8403701	CGGCAG	TGGCAT	MODERATE	missense_variant	Dbf4	p.LeuPro239MetPro
chr5	8408253	C	G	MODERATE	missense_variant	Dbf4	p.Ser193Thr
chr5	8421262	T	C	MODERATE	missense_variant	Dbf4	p.Ile60Val
chr5	8492473	G	T	MODERATE	missense_variant	Rundc3b	p.Leu400Ile
chr5	8528713	T	C	MODERATE	missense_variant	Rundc3b	p.Ser232Gly
chr5	8674831	G	A	MODERATE	missense_variant	Abcb1a	p.Ser88Asn
chr5	8740462	G	C	MODERATE	missense_variant	Abcb1a	p.Gln1108His
chr5	8810564	C	T	MODERATE	missense_variant	Abcb1b	p.Pro95Leu
chr5	8824252	G	C	MODERATE	missense_variant	Abcb1b	p.Glu392Asp
chr5	8828857	G	A	MODERATE	missense_variant	Abcb1b	p.Arg747Gln
chr5	8835101	G	A	MODERATE	missense_variant	Abcb1b	p.Ser822Asn
chr5	9121353	T	G	MODERATE	missense_variant	Dmtf1	p.Glu588Ala
chr5	9129352	T	C	MODERATE	missense_variant	Dmtf1	p.Lys282Arg
chr5	16553872	G	A	HIGH	splice_acceptor_variant&intron_variant	Hgf
chr5	17785844	G	T	MODERATE	missense_variant	Cd36	p.Gln433Lys
chr5	20789679	C	T	MODERATE	missense_variant	Phtf2	p.Gly319Ser
chr5	20794318	T	C	MODERATE	missense_variant	Phtf2	p.Thr276Ala
chr5	20794396	T	C	MODERATE	missense_variant	Phtf2	p.Ser250Gly
chr5	20801919	AGCAA	TGCAT	MODERATE	missense_variant	Phtf2	p.LeuAla214HisAla
chr5	20896169	G	A	MODERATE	missense_variant	Rsbn1l	p.Ser791Leu
chr5	21001317	C	A	MODERATE	missense_variant	Ptpn12	p.Ser326Ile
chr5	21022061	G	A	MODERATE	missense_variant	Ptpn12	p.Thr81Ile
chr5	21022076	T	C	MODERATE	missense_variant	Ptpn12	p.Lys76Arg
chr5	21222416	A	G	MODERATE	missense_variant	Gsap	p.Thr181Ala
chr5	21242844	G	A	MODERATE	missense_variant	Gsap	p.Arg300Gln
chr5	21246980	G	C	MODERATE	missense_variant	Gsap	p.Gly340Ala
chr5	21251062	G	A	MODERATE	missense_variant	Gsap	p.Arg419Gln
chr5	21251121	T	G	MODERATE	missense_variant	Gsap	p.Ser439Ala
chr5	21253997	A	G	MODERATE	missense_variant	Gsap	p.Met487Val
chr5	21373053	A	G	MODERATE	missense_variant	Fgl2	p.Asn113Asp
chr5	21375316	G	A	MODERATE	missense_variant	Fgl2	p.Ala219Thr
chr5	21429795	G	A	MODERATE	missense_variant	Fam185a	p.Asp161Asn
chr5	21480391	AC	TT	MODERATE	missense_variant	Fam185a	p.Thr362Phe
chr5	21756861	A	G	MODERATE	missense_variant	Pmpcb	p.His459Arg
chr5	21786769	G	C	MODERATE	missense_variant	Psmc2	p.Lys27Asn
chr5	21915047	T	G	MODERATE	missense_variant	Reln	p.Lys2869Thr
chr5	21976627	C	T	MODERATE	missense_variant	Reln	p.Val1753Ile
chr5	21995439	T	G	MODERATE	missense_variant	Reln	p.Glu1354Asp
chr5	21997949	A	C	MODERATE	missense_variant	Reln	p.Asp1284Glu
chr5	22103436	G	A	MODERATE	missense_variant	Reln	p.His312Tyr
chr5	22134611	C	T	MODERATE	missense_variant	Reln	p.Gly248Ser
chr5	23800712	A	C	MODERATE	missense_variant	Rint1	p.Ile131Leu
chr5	23800731	T	C	MODERATE	missense_variant	Rint1	p.Met137Thr
chr5	23805600	A	G	MODERATE	missense_variant	Rint1	p.His240Arg
chr5	23811820	A	T	MODERATE	missense_variant	Rint1	p.Thr528Ser
chr5	24182411	T	G	MODERATE	missense_variant	Nupl2	p.Ser400Ala
chr5	24321304	C	T	MODERATE	missense_variant	Kcnh2	p.Ala1094Thr
chr5	24387443	T	C	MODERATE	missense_variant	Atg9b	p.Thr606Ala
chr5	24391736	A	G	MODERATE	missense_variant	Atg9b	p.Cys61Arg
chr5	24399969	T	C	MODERATE	missense_variant	Abcb8	p.Val51Ala
chr5	24400013	T	C	MODERATE	missense_variant	Abcb8	p.Trp66Arg
chr5	24409483	T	C	MODERATE	missense_variant	Abcb8	p.Ser715Pro
chr5	24496756	A	G	MODERATE	missense_variant	Agap3	p.Thr506Ala
chr5	24573728	G	C	MODERATE	missense_variant	Abcf2	p.Pro144Arg
chr5	25247501	A	G	MODERATE	missense_variant	Galnt11	p.Ile4Val
chr5	25250094	A	G	MODERATE	missense_variant	Galnt11	p.Arg143Gly
chr5	25298899	TCAGTTTA	ACAGTTTC	MODERATE	missense_variant	Kmt2c	p.GlyLysLeuIle3801GlyLysLeuPhe
chr5	25299409	A	T	MODERATE	missense_variant	Kmt2c	p.Ser3634Thr
chr5	25300427	AAGTGA	GAGTGG	MODERATE	missense_variant	Kmt2c	p.SerLeu3293ProLeu
chr5	25310071	C	T	MODERATE	missense_variant	Kmt2c	p.Asp2925Asn
chr5	25314841	G	C	MODERATE	missense_variant	Kmt2c	p.His2090Gln
chr5	25314902	G	A	MODERATE	missense_variant	Kmt2c	p.Ala2070Val
chr5	25338490	A	T	MODERATE	missense_variant	Kmt2c	p.Phe1389Tyr
chr5	25347380	C	G	MODERATE	missense_variant	Kmt2c	p.Gln1308His
chr5	25409197	T	C	MODERATE	missense_variant	Kmt2c	p.Asn175Ser
chr5	27766191	C	T	MODERATE	missense_variant	Paxip1	p.Ala387Thr
chr5	28352528	A	T	MODERATE	missense_variant	Rbm33	p.Glu246Asp
chr5	28391160	C	A	MODERATE	missense_variant	Rbm33	p.Pro827Thr
chr5	28394186	CGCA	C	MODERATE	disruptive_inframe_deletion	Rbm33	p.Gln898del
chr5	28410754	A	G	MODERATE	missense_variant	Rbm33	p.Ile1185Val
chr5	29346807	G	T	MODERATE	missense_variant	Lmbr1	p.His93Gln
chr5	29435534	G	A	MODERATE	missense_variant	Nom1	p.Arg286Lys
chr5	29435570	G	A	MODERATE	missense_variant	Nom1	p.Gly298Glu
chr5	29440120	G	A	MODERATE	missense_variant	Nom1	p.Ala529Thr
chr5	29443351	C	T	MODERATE	missense_variant&splice_region_variant	Nom1	p.Ala632Val
chr5	29451106	C	T	MODERATE	missense_variant	Nom1	p.Thr823Ile
chr5	29451180	G	A	MODERATE	missense_variant	Nom1	p.Gly848Ser
chr5	29474119	TTGCCGG	T	MODERATE	disruptive_inframe_deletion	Mnx1	p.Thr320_Gly321del
chr5	30123683	T	A	MODERATE	missense_variant	Hadha	p.Glu468Asp
chr5	30657758	T	G	MODERATE	missense_variant	Slc35f6	p.Phe343Cys
chr5	30876700	G	C	MODERATE	missense_variant	Tmem214	p.Leu658Phe
chr5	30917009	G	A	MODERATE	missense_variant	Emilin1	p.Arg198Gln
chr5	30917072	T	C	MODERATE	missense_variant	Emilin1	p.Val219Ala
chr5	30917536	A	G	MODERATE	missense_variant	Emilin1	p.Thr374Ala
chr5	30918122	GCCAGCTGG	ACCAGCTGC	MODERATE	missense_variant	Emilin1	p.SerGlnLeuGlu569AsnGlnLeuGln
chr5	30954155	AT	A	HIGH	frameshift_variant&splice_region_variant	Abhd1	p.Met236fs
chr5	30955700	G	A	MODERATE	missense_variant	Preb	p.Ser346Leu
chr5	30968890	AGGACAAGGCA	GGGACAAGGCG	MODERATE	missense_variant	Tcf23	p.ArgThrArgGln38GlyThrArgArg
chr5	30973573	A	G	MODERATE	missense_variant	Tcf23	p.Lys185Arg
chr5	30973635	T	C	MODERATE	missense_variant	Tcf23	p.Phe206Leu
chr5	31037748	C	T	MODERATE	missense_variant	Slc5a6	p.Ala502Thr
chr5	31048683	G	A	MODERATE	missense_variant	Atraid	p.Arg4Gln
chr5	31048730	G	A	MODERATE	missense_variant	Atraid	p.Val20Met
chr5	31072833	G	T	MODERATE	missense_variant	Cad	p.Ala1527Ser
chr5	31174279	C	CTCT	MODERATE	inframe_insertion	Gtf3c2	p.Asp64_Arg65insLys
chr5	31174356	T	TGAG	MODERATE	disruptive_inframe_insertion	Gtf3c2	p.Ser39dup
chr5	31189619	C	T	MODERATE	missense_variant	Eif2b4	p.Val402Ile
chr5	31261854	A	G	MODERATE	missense_variant	Ift172	p.Tyr1148His
chr5	31261875	C	T	MODERATE	missense_variant	Ift172	p.Ala1141Thr
chr5	31465537	T	G	MODERATE	missense_variant	Zfp512	p.Cys61Gly
chr5	31480180	CCC	TCT	MODERATE	missense_variant	Zfp512	p.Pro538Ser
chr5	31494812	C	G	MODERATE	missense_variant	Gpn1	p.Arg14Gly
chr5	31518348	A	T	MODERATE	missense_variant	Supt7l	p.Ser299Thr
chr5	31528120	A	G	MODERATE	missense_variant	Slc4a1ap	p.Ile247Met
chr5	31528217	C	A	MODERATE	missense_variant	Slc4a1ap	p.Leu280Met
chr5	31543808	G	A	MODERATE	missense_variant	Slc4a1ap	p.Gly618Arg
chr5	31647849	TCAT	CCAA	MODERATE	missense_variant	Rbks	p.MetIle223LeuVal
chr5	31660033	A	G	MODERATE	missense_variant	Rbks	p.Phe131Leu
chr5	31697591	C	G	MODERATE	missense_variant	Rbks	p.Cys4Ser
chr5	31702037	G	GA	HIGH	frameshift_variant	Bre	p.Gly31fs
chr5	31702053	A	G	MODERATE	missense_variant	Bre	p.Gln34Arg
chr5	31702068	A	G	MODERATE	missense_variant	Bre	p.Lys39Arg
chr5	31820634	G	A	MODERATE	missense_variant	Bre	p.Glu190Lys
chr5	32247510	A	G	MODERATE	missense_variant	Plb1	p.Tyr4Cys
chr5	32247532	A	ACTGCTG	MODERATE	disruptive_inframe_insertion	Plb1	p.Leu15_Leu16dup
chr5	32316649	G	A	MODERATE	missense_variant	Plb1	p.Val602Ile
chr5	32317234	G	A	MODERATE	missense_variant	Plb1	p.Val647Met
chr5	32332837	T	C	MODERATE	missense_variant	Plb1	p.Leu1007Pro
chr5	32355359	T	C	MODERATE	missense_variant	Plb1	p.Tyr1354His
chr5	32364034	C	T	MODERATE	missense_variant	Plb1	p.Leu1410Phe
chr5	32364157	CAGG	C	MODERATE	disruptive_inframe_deletion	Plb1	p.Glu1456del
chr5	32793537	G	A	MODERATE	missense_variant	Prr14l	p.Leu1971Phe
chr5	32793569	T	C	MODERATE	missense_variant	Prr14l	p.Gln1960Arg
chr5	32793584	C	T	MODERATE	missense_variant	Prr14l	p.Gly1955Glu
chr5	32828312	A	T	MODERATE	missense_variant	Prr14l	p.Trp1280Arg
chr5	32828513	G	C	MODERATE	missense_variant	Prr14l	p.Pro1213Ala
chr5	32829191	C	T	MODERATE	missense_variant	Prr14l	p.Ala987Thr
chr5	32829631	A	G	MODERATE	missense_variant	Prr14l	p.Phe840Ser
chr5	32829782	T	C	MODERATE	missense_variant	Prr14l	p.Ile790Val
chr5	32830216	G	A	MODERATE	missense_variant	Prr14l	p.Thr645Ile
chr5	32835619	C	T	MODERATE	missense_variant	Prr14l	p.Gly181Arg
chr5	32943248	TCG	CCA	MODERATE	missense_variant	Depdc5	p.AsnArg834AsnHis
chr5	32946694	GCAG	TCAA	MODERATE	missense_variant	Depdc5	p.AlaAla1018SerThr
chr5	32990802	G	A	MODERATE	missense_variant	Depdc5	p.Ser1476Asn
chr5	33217304	T	C	MODERATE	missense_variant	Spon2	p.Thr53Ala
chr5	33217403	T	G	MODERATE	missense_variant	Spon2	p.Ile20Leu
chr5	33414030	A	G	MODERATE	missense_variant	Uvssa	p.Thr673Ala
chr5	33600684	T	C	MODERATE	missense_variant	Fam53a	p.Asn365Ser
chr5	33600712	T	C	MODERATE	missense_variant	Fam53a	p.Ile356Val
chr5	33667999	G	T	MODERATE	missense_variant	Tacc3	p.Lys384Asn
chr5	33668705	A	T	MODERATE	missense_variant	Tacc3	p.Tyr451Phe
chr5	33669510	A	C	MODERATE	missense_variant	Tacc3	p.Ile488Leu
chr5	33727881	G	A	MODERATE	missense_variant	Fgfr3	p.Arg113Gln
chr5	33743707	T	G	MODERATE	missense_variant	Letm1	p.Ile668Leu
chr5	33747477	G	C	MODERATE	missense_variant	Letm1	p.Leu502Val
chr5	33778635	G	T	MODERATE	missense_variant	Letm1	p.Thr38Asn
chr5	33846109	C	A	MODERATE	missense_variant	Whsc1	p.Pro201Gln
chr5	33855583	C	A	MODERATE	missense_variant	Whsc1	p.Asp419Glu
chr5	33867634	G	A	MODERATE	missense_variant	Whsc1	p.Ala579Thr
chr5	33881169	A	C	MODERATE	missense_variant	Whsc1	p.Asn775His
chr5	34499708	C	A	MODERATE	missense_variant	Tnip2	p.Arg230Leu
chr5	34503806	GCTCC	ACTCT	MODERATE	missense_variant	Tnip2	p.ThrGluArg99ThrGluCys
chr5	34551585	G	C	MODERATE	missense_variant	Sh3bp2	p.Gln63His
chr5	34556884	GTTCCAGC	TTTCCAGT	HIGH	splice_acceptor_variant&splice_region_variant&synonymous_variant&intron_variant	Sh3bp2	p.Ser199Ser
chr5	34559159	T	C	MODERATE	missense_variant	Sh3bp2	p.Ser305Pro
chr5	34559532	T	C	MODERATE	missense_variant	Sh3bp2	p.Phe429Ser
chr5	34616746	C	A	MODERATE	missense_variant	Add1	p.His449Asn
chr5	34639266	T	A	MODERATE	missense_variant	Nop14	p.Gln749Leu
chr5	34640872	G	T	MODERATE	missense_variant&splice_region_variant	Nop14	p.Gln736Lys
chr5	34640911	A	C	MODERATE	missense_variant	Nop14	p.Ser723Ala
chr5	34640935	A	C	MODERATE	missense_variant	Nop14	p.Phe715Val
chr5	34641000	G	A	MODERATE	missense_variant	Nop14	p.Ser693Leu
chr5	34641405	T	C	MODERATE	missense_variant	Nop14	p.Thr660Ala
chr5	34648393	C	T	MODERATE	missense_variant&splice_region_variant	Nop14	p.Val503Met
chr5	34648434	G	A	MODERATE	missense_variant	Nop14	p.Thr489Ile
chr5	34650531	G	C	MODERATE	missense_variant	Nop14	p.Asp362Glu
chr5	34653909	C	T	MODERATE	missense_variant	Nop14	p.Asp239Asn
chr5	34804528	C	T	MODERATE	missense_variant	Htt	p.His286Tyr
chr5	34882955	A	G	MODERATE	missense_variant	Htt	p.Asn2154Asp
chr5	35042625	C	T	MODERATE	missense_variant	Hgfac	p.His117Tyr
chr5	35044834	C	A	MODERATE	missense_variant	Hgfac	p.Arg360Ser
chr5	35048331	A	G	MODERATE	missense_variant	Hgfac	p.Thr652Ala
chr5	35079627	A	C	MODERATE	missense_variant	Dok7	p.Thr420Pro
chr5	35079652	C	T	MODERATE	missense_variant	Dok7	p.Ala428Val
chr5	35098184	ATTGTACTCC	GTTGTACTCG	MODERATE	missense_variant	Lrpap1	p.GlnGluTyrAsn187HisGluTyrAsn
chr5	35557983	T	C	MODERATE	missense_variant	Trmt44	p.Gln662Arg
chr5	35558023	G	A	MODERATE	missense_variant	Trmt44	p.Arg649Trp
chr5	35564209	C	T	MODERATE	missense_variant	Trmt44	p.Ala537Thr
chr5	35564235	G	T	MODERATE	missense_variant	Trmt44	p.Ala528Asp
chr5	35564269	T	C	MODERATE	missense_variant	Trmt44	p.Asn517Asp
chr5	35564389	T	C	MODERATE	missense_variant	Trmt44	p.Thr477Ala
chr5	35572764	G	C	MODERATE	missense_variant	Trmt44	p.Ser254Cys
chr5	35574855	T	A	MODERATE	missense_variant	Trmt44	p.Gln64Leu
chr5	35588192	A	G	MODERATE	missense_variant	Acox3	p.Lys8Arg
chr5	35706596	C	T	MODERATE	missense_variant	Sh3tc1	p.Arg749Lys
chr5	35707235	T	C	MODERATE	missense_variant	Sh3tc1	p.Tyr536Cys
chr5	35707376	C	G	MODERATE	missense_variant	Sh3tc1	p.Arg489Pro
chr5	35707394	A	G	MODERATE	missense_variant	Sh3tc1	p.Leu483Pro
chr5	35716266	T	G	MODERATE	missense_variant	Sh3tc1	p.Lys232Gln
chr5	35935648	C	G	MODERATE	missense_variant	Afap1	p.Thr32Ser
chr5	36029178	CAGGGGAGCTGGAG	TAGGGGGGCTGGAT	HIGH	splice_acceptor_variant&splice_region_variant&synonymous_variant&intron_variant	Sorcs2	p.SerProLeu871SerProLeu
chr5	36039352	C	T	MODERATE	missense_variant	Sorcs2	p.Gly650Ser
chr5	36068112	C	T	MODERATE	missense_variant	Sorcs2	p.Val310Met
chr5	36077932	A	G	MODERATE	missense_variant	Sorcs2	p.Met252Thr
chr5	36205200	A	C	MODERATE	missense_variant	Psapl1	p.Ile379Leu
chr5	36205568	AATGTGTA	GATGTGTG	MODERATE	missense_variant	Psapl1	p.GluMetCysAsn501GluMetCysAsp
chr5	36525023	G	A	MODERATE	missense_variant	Tbc1d14	p.Pro311Leu
chr5	36571319	G	T	MODERATE	missense_variant	Tbc1d14	p.His254Gln
chr5	36571883	G	T	MODERATE	missense_variant	Tbc1d14	p.Asp66Glu
chr5	36615696	T	C	MODERATE	missense_variant	D5Ertd579e	p.Ile452Val
chr5	36616051	A	C	MODERATE	missense_variant	D5Ertd579e	p.His333Gln
chr5	36807833	T	C	MODERATE	missense_variant	Man2b2	p.Gln972Arg
chr5	36809019	CGCAGGCC	TGCAGGCT	MODERATE	missense_variant	Man2b2	p.ArgProAla941GlnProAla
chr5	36813039	A	G	MODERATE	missense_variant	Man2b2	p.Met841Thr
chr5	36814363	T	C	MODERATE	missense_variant	Man2b2	p.Thr670Ala
chr5	36815494	C	T	MODERATE	missense_variant	Man2b2	p.Gly559Arg
chr5	36821928	C	T	MODERATE	missense_variant	Man2b2	p.Gly256Glu
chr5	36826060	C	T	MODERATE	missense_variant	Man2b2	p.Asp182Asn
chr5	36830530	AC	CT	MODERATE	missense_variant	Man2b2	p.LeuLeu15LeuVal
chr5	36973243	C	T	MODERATE	missense_variant	Wfs1	p.Val220Ile
chr5	36982079	G	A	MODERATE	missense_variant	Wfs1	p.Arg72Trp
chr5	37338635	T	G	MODERATE	missense_variant	Evc2	p.Ser30Ala
chr5	37357440	C	T	MODERATE	missense_variant	Evc2	p.Ala214Val
chr5	37357469	G	T	MODERATE	missense_variant	Evc2	p.Val224Leu
chr5	37357517	A	G	MODERATE	missense_variant	Evc2	p.Met240Val
chr5	37378396	A	ATGC	MODERATE	disruptive_inframe_insertion	Evc2	p.Leu473dup
chr5	37387082	T	C	MODERATE	missense_variant	Evc2	p.Leu725Pro
chr5	37387111	C	A	MODERATE	missense_variant	Evc2	p.Leu735Met
chr5	37410402	A	G	MODERATE	missense_variant	Evc2	p.Ser908Gly
chr5	37415720	TCTGCAGGAG	T	HIGH	splice_acceptor_variant&inframe_deletion&splice_region_variant&intron_variant	Evc2	p.Glu928_Leu929del
chr5	37417459	T	G	MODERATE	missense_variant	Evc2	p.Ile1019Met
chr5	37419289	A	G	MODERATE	missense_variant	Evc2	p.Ser1086Gly
chr5	37419316	A	G	MODERATE	missense_variant	Evc2	p.Ser1095Gly
chr5	37421927	A	G	MODERATE	missense_variant	Evc2	p.Gln1128Arg
chr5	37421938	CGGTA	AGGTG	HIGH	splice_donor_variant&missense_variant&splice_region_variant&intron_variant	Evc2	p.Arg1132Ser
chr5	37739250	AG	GT	MODERATE	missense_variant	Cytl1	p.GluAsp125GluTyr
chr5	38104977	T	G	MODERATE	missense_variant	Stx18	p.His112Gln
chr5	38116153	C	T	MODERATE	missense_variant	Stx18	p.Ala189Val
chr5	38200827	T	C	MODERATE	missense_variant	Zbtb49	p.Gln694Arg
chr5	38200989	C	G	MODERATE	missense_variant	Zbtb49	p.Ser640Thr
chr5	38213591	TGCCG	AGCCA	MODERATE	missense_variant	Zbtb49	p.SerAla314LeuAla
chr5	38213998	TTGCCG	CTGCCA	MODERATE	missense_variant	Zbtb49	p.SerAlaAsn178LeuAlaAsp
chr5	38214017	GT	AC	MODERATE	missense_variant	Zbtb49	p.Asn173Ser
chr5	38214123	C	T	MODERATE	missense_variant	Zbtb49	p.Ser138Asn
chr5	38230616	C	A	MODERATE	missense_variant	Lyar	p.Pro162Gln
chr5	38234010	C	T	MODERATE	missense_variant	Lyar	p.Ala351Val
chr5	38382059	G	A	MODERATE	missense_variant	Slc2a9	p.Ala381Val
chr5	38440737	A	C	MODERATE	missense_variant	Slc2a9	p.Ser131Ala
chr5	38480046	C	G	MODERATE	missense_variant	Slc2a9	p.Arg29Thr
chr5	38480059	G	A	MODERATE	missense_variant	Slc2a9	p.His25Tyr
chr5	38483341	GGA	AGG	MODERATE	missense_variant	Slc2a9	p.Ser8Pro
chr5	38672904	G	A	MODERATE	missense_variant	Zfp518b	p.Thr586Met
chr5	41788862	G	C	MODERATE	missense_variant	Bod1l	p.Asp3023Glu
chr5	41794273	G	GCTC	MODERATE	inframe_insertion	Bod1l	p.Glu2931dup
chr5	41795090	C	G	MODERATE	missense_variant	Bod1l	p.Glu2862Gln
chr5	41799777	T	A	MODERATE	missense_variant	Bod1l	p.Thr2835Ser
chr5	41799902	C	A	MODERATE	missense_variant	Bod1l	p.Ala2821Ser
chr5	41799957	A	C	MODERATE	missense_variant	Bod1l	p.His2802Gln
chr5	41805196	T	C	MODERATE	missense_variant	Bod1l	p.Thr2733Ala
chr5	41808722	C	T	MODERATE	missense_variant	Bod1l	p.Glu2667Lys
chr5	41808756	T	A	MODERATE	missense_variant	Bod1l	p.Lys2655Asn
chr5	41816307	G	C	MODERATE	missense_variant	Bod1l	p.Pro2555Ala
chr5	41816519	G	A	MODERATE	missense_variant	Bod1l	p.Thr2484Ile
chr5	41817386	A	G	MODERATE	missense_variant	Bod1l	p.Phe2195Ser
chr5	41817743	C	A	MODERATE	missense_variant	Bod1l	p.Arg2076Met
chr5	41818574	CTT	TTG	MODERATE	missense_variant	Bod1l	p.GluSer1798AspAsn
chr5	41819148	C	T	MODERATE	missense_variant	Bod1l	p.Gly1608Ser
chr5	41819522	C	T	MODERATE	missense_variant	Bod1l	p.Arg1483Lys
chr5	41819612	A	C	MODERATE	missense_variant	Bod1l	p.Val1453Gly
chr5	41820456	C	T	MODERATE	missense_variant	Bod1l	p.Ala1172Thr
chr5	41820637	C	A	MODERATE	missense_variant	Bod1l	p.Glu1111Asp
chr5	41821059	T	C	MODERATE	missense_variant	Bod1l	p.Thr971Ala
chr5	41821341	C	T	MODERATE	missense_variant	Bod1l	p.Ala877Thr
chr5	41832429	A	G	MODERATE	missense_variant	Bod1l	p.Met317Thr
chr5	41832450	GTGC	CTGT	MODERATE	missense_variant	Bod1l	p.SerThr309AsnSer
chr5	41832615	G	A	MODERATE	missense_variant	Bod1l	p.Thr255Ile
chr5	41832687	G	A	MODERATE	missense_variant	Bod1l	p.Thr231Ile
chr5	43668674	ACCAAC	GCCAAT	MODERATE	missense_variant	Cc2d2a	p.ThrAsn3AlaAsn
chr5	43688214	G	T	MODERATE	missense_variant	Cc2d2a	p.Arg324Leu
chr5	43703205	C	T	MODERATE	missense_variant	Cc2d2a	p.Pro541Leu
chr5	43728278	A	G	MODERATE	missense_variant	Cc2d2a	p.Asp1266Gly
chr5	43729998	A	C	MODERATE	missense_variant	Cc2d2a	p.Lys1318Gln
chr5	43735351	T	A	MODERATE	missense_variant	Cc2d2a	p.Asn1418Lys
chr5	43758201	C	T	MODERATE	missense_variant	Fbxl5	p.Cys623Tyr
chr5	43758747	G	A	MODERATE	missense_variant	Fbxl5	p.Thr441Met
chr5	43907980	T	A	MODERATE	missense_variant	Cd38	p.Asn274Lys
chr5	43979768	G	T	MODERATE	missense_variant	Fgfbp1	p.Leu61Met
chr5	44016568	G	C	MODERATE	missense_variant&splice_region_variant	Prom1	p.Gln590Glu
chr5	44177173	G	C	MODERATE	missense_variant	Tapt1	p.Thr492Arg
chr5	45503475	T	C	MODERATE	missense_variant	Lap3	p.Met267Thr
chr5	45676663	G	A	MODERATE	missense_variant	Ncapg	p.Arg347Lys
chr5	45681381	A	G	MODERATE	missense_variant	Ncapg	p.Ile465Val
chr5	45691725	G	A	MODERATE	missense_variant	Ncapg	p.Glu668Lys
chr5	45693817	T	C	MODERATE	missense_variant	Ncapg	p.Val784Ala
chr5	47987877	T	C	MODERATE	missense_variant	Slit2	p.Ile73Thr
chr5	48189583	G	A	MODERATE	missense_variant	Slit2	p.Val256Ile
chr5	48281756	C	G	MODERATE	missense_variant	Slit2	p.Asp1087Glu
chr5	48281962	T	C	MODERATE	missense_variant	Slit2	p.Phe1126Ser
chr5	48302385	A	G	MODERATE	missense_variant	Slit2	p.Met1336Val
chr5	48379413	A	C	MODERATE	missense_variant	Pacrgl	p.Glu150Asp
chr5	48381866	A	G	MODERATE	missense_variant&splice_region_variant	Pacrgl	p.Asn230Ser
chr5	52368021	A	G	MODERATE	missense_variant	Sod3	p.Asn21Asp
chr5	52368129	G	C	MODERATE	missense_variant	Sod3	p.Glu57Gln
chr5	52376414	T	C	MODERATE	missense_variant	Ccdc149	p.Lys470Arg
chr5	52376446	C	A	MODERATE	missense_variant	Ccdc149	p.Glu459Asp
chr5	52376493	C	T	MODERATE	missense_variant	Ccdc149	p.Glu444Lys
chr5	52546705	T	C	MODERATE	missense_variant	Lgi2	p.Thr195Ala
chr5	52643893	G	T	MODERATE	missense_variant	Sepsecs	p.Arg476Ser
chr5	52656260	C	A	MODERATE	missense_variant	Sepsecs	p.Glu300Asp
chr5	52807002	A	C	MODERATE	missense_variant	Zcchc4	p.Lys267Gln
chr5	52808325	C	G	MODERATE	missense_variant	Zcchc4	p.Gln324Glu
chr5	52856802	TTACAGA	CTACAGG	HIGH	splice_acceptor_variant&missense_variant&splice_region_variant&intron_variant	Anapc4	p.Met440Val
chr5	53058370	A	G	MODERATE	missense_variant	Slc34a2	p.Asn41Ser
chr5	53108082	C	T	MODERATE	missense_variant	Sel1l3	p.Asp1123Asn
chr5	53116171	T	C	MODERATE	missense_variant	Sel1l3	p.Tyr1089Cys
chr5	53846232	C	T	MODERATE	missense_variant	Tbc1d19	p.Thr208Ile
chr5	54111098	C	T	MODERATE	missense_variant	Stim2	p.Pro493Ser
chr5	61809193	C	T	MODERATE	missense_variant	G6pd2	p.Arg104Cys
chr5	61809445	T	G	MODERATE	missense_variant	G6pd2	p.Ser188Ala
chr5	61810382	G	C	MODERATE	missense_variant	G6pd2	p.Gly500Ala
chr5	62604379	GGATCT	TGATCG	MODERATE	missense_variant	Arap2	p.AlaAspPro1666AlaAspHis
chr5	62630157	T	C	MODERATE	missense_variant	Arap2	p.Ile1419Val
chr5	62646262	T	C	MODERATE	missense_variant	Arap2	p.Ser1221Gly
chr5	62676062	A	G	MODERATE	missense_variant	Arap2	p.Phe879Ser
chr5	62749018	GT	CT,G	HIGH	frameshift_variant	Arap2	p.Asp219fs
chr5	62749371	GGG	TGC	MODERATE	missense_variant	Arap2	p.ThrHis101SerAsn
chr5	63898403	G	A	MODERATE	missense_variant	0610040J01Rik	p.Val161Met
chr5	63898502	A	G	MODERATE	missense_variant	0610040J01Rik	p.Thr194Ala
chr5	63898599	T	A	MODERATE	missense_variant	0610040J01Rik	p.Leu226Gln
chr5	63898731	G	A	MODERATE	missense_variant	0610040J01Rik	p.Ser270Asn
chr5	63938018	T	C	MODERATE	missense_variant	Rell1	p.His35Arg
chr5	64108223	C	A	MODERATE	missense_variant	Pgm1	p.Asp422Glu
chr5	64925644	T	C	MODERATE	missense_variant	Tlr1	p.Gln530Arg
chr5	64926493	A	G	MODERATE	missense_variant	Tlr1	p.Leu247Pro
chr5	64926518	C	T	MODERATE	missense_variant	Tlr1	p.Ala239Thr
chr5	64926616	C	T	MODERATE	missense_variant	Tlr1	p.Arg206His
chr5	64926775	C	T	MODERATE	missense_variant	Tlr1	p.Arg153Gln
chr5	64926898	A	G	MODERATE	missense_variant	Tlr1	p.Leu112Ser
chr5	64953438	C	A	MODERATE	missense_variant	Tlr6	p.Ala709Ser
chr5	64954068	G	A	MODERATE	missense_variant	Tlr6	p.Leu499Phe
chr5	64955178	A	C	MODERATE	missense_variant	Tlr6	p.Cys129Gly
chr5	64955192	T	C	MODERATE	missense_variant	Tlr6	p.Gln124Arg
chr5	64979911	C	A	MODERATE	missense_variant	Fam114a1	p.Pro66Thr
chr5	64979993	A	T	MODERATE	missense_variant	Fam114a1	p.Glu93Val
chr5	65006060	A	G	MODERATE	missense_variant	Fam114a1	p.Arg193Gly
chr5	65006091	CG	TA	MODERATE	missense_variant	Fam114a1	p.Ala203Val
chr5	65034400	A	G	MODERATE	missense_variant	Fam114a1	p.Thr499Ala
chr5	65040697	G	A	MODERATE	missense_variant	Fam114a1	p.Arg556His
chr5	65148761	G	A	MODERATE	missense_variant	Klhl5	p.Arg357Lys
chr5	65228627	G	A	MODERATE	missense_variant	Wdr19	p.Arg650Lys
chr5	65250990	C	G	MODERATE	missense_variant	Wdr19	p.Ser1118Cys
chr5	65266205	T	G	MODERATE	missense_variant	Rfc1	p.Lys1007Thr
chr5	65279618	T	C	MODERATE	missense_variant	Rfc1	p.Asn559Ser
chr5	65279702	A	G	MODERATE	missense_variant	Rfc1	p.Leu531Pro
chr5	65284883	T	C	MODERATE	missense_variant	Rfc1	p.Lys482Arg
chr5	65303023	T	C	MODERATE	missense_variant	Rfc1	p.Ser172Gly
chr5	65311073	T	C	MODERATE	missense_variant	Rfc1	p.Gln99Arg
chr5	65312967	T	A	MODERATE	missense_variant	Rfc1	p.Asn66Tyr
chr5	65453260	TGGCG	CGGCA	MODERATE	missense_variant	Smim14	p.IleAlaMet63IleAlaVal
chr5	65790396	C	T	MODERATE	missense_variant	N4bp2	p.Thr123Ile
chr5	65790612	C	T	MODERATE	missense_variant	N4bp2	p.Ala195Val
chr5	65791097	G	A	MODERATE	missense_variant	N4bp2	p.Ala357Thr
chr5	65806339	G	C	MODERATE	missense_variant	N4bp2	p.Gly577Ala
chr5	65806520	GCCTGCG	TCCTGCA	MODERATE	missense_variant	N4bp2	p.ArgProAla637SerProAla
chr5	65806559	TGA	CGG	MODERATE	missense_variant	N4bp2	p.AspAsp650AspGly
chr5	65806631	G	A	MODERATE	missense_variant	N4bp2	p.Met674Ile
chr5	65807421	A	G	MODERATE	missense_variant	N4bp2	p.Ile938Val
chr5	65807595	G	A	MODERATE	missense_variant	N4bp2	p.Ala996Thr
chr5	65807860	C	T	MODERATE	missense_variant	N4bp2	p.Ser1084Phe
chr5	65808028	GTAA	G	MODERATE	inframe_deletion	N4bp2	p.Asn1142del
chr5	65808085	A	G	MODERATE	missense_variant	N4bp2	p.Lys1159Arg
chr5	66019277	C	T	MODERATE	missense_variant	Rbm47	p.Ala568Thr
chr5	66974565	G	A	MODERATE	missense_variant	Limch1	p.Val280Ile
chr5	67002567	A	G	MODERATE	missense_variant	Limch1	p.Asp602Gly
chr5	67021907	T	A	MODERATE	missense_variant	Limch1	p.Ser719Thr
chr5	67026072	C	T	MODERATE	missense_variant&splice_region_variant	Limch1	p.Ala749Val
chr5	67030865	G	A	MODERATE	missense_variant	Limch1	p.Glu869Lys
chr5	67030937	C	T	MODERATE	missense_variant	Limch1	p.Pro893Ser
chr5	67033105	TGAAAT	CGAAAA	MODERATE	missense_variant	Limch1	p.ProGluIle906ProGluAsn
chr5	67324674	T	C	MODERATE	missense_variant&splice_region_variant	Slc30a9	p.Val91Ala
chr5	67345682	A	T	MODERATE	missense_variant	Slc30a9	p.Thr376Ser
chr5	69566418	C	A	MODERATE	missense_variant	Guf1	p.Gln447Lys
chr5	72160987	TCA	CCG	MODERATE	missense_variant	Commd8	p.AspAsp150AspGly
chr5	72162742	C	T	MODERATE	missense_variant	Commd8	p.Asp119Asn
chr5	72165399	AACATCTTC	GACATCTTG	MODERATE	missense_variant	Commd8	p.GluAspVal56GlnAspVal
chr5	72165482	A	G	MODERATE	missense_variant	Commd8	p.Phe31Leu
chr5	72203443	T	A	HIGH	start_lost	Atp10d	p.Met1?
chr5	72203497	C	G	MODERATE	missense_variant	Atp10d	p.Pro19Arg
chr5	72227726	G	A	MODERATE	missense_variant	Atp10d	p.Ala73Thr
chr5	72255096	G	A	MODERATE	missense_variant	Atp10d	p.Gly581Arg
chr5	72260972	C	A	MODERATE	missense_variant	Atp10d	p.Leu614Ile
chr5	72264109	G	C	MODERATE	missense_variant	Atp10d	p.Ser696Thr
chr5	72264280	T	C	MODERATE	missense_variant	Atp10d	p.Val753Ala
chr5	72264328	C	T	MODERATE	missense_variant	Atp10d	p.Ser769Leu
chr5	72264471	T	C	HIGH	stop_lost	Atp10d	p.Ter817Glnext*?
chr5	72524162	CAAC	TAAT	MODERATE	missense_variant	Nfxl1	p.MetLeu674IleLeu
chr5	72647895	T	A	MODERATE	missense_variant	Nipal1	p.Val3Glu
chr5	72658747	GAGTC	CAGTT	MODERATE	missense_variant	Nipal1	p.GluSer38GlnLeu
chr5	72666907	A	G	MODERATE	missense_variant	Nipal1	p.His198Arg
chr5	73022159	T	A	MODERATE	missense_variant	Fryl	p.Glu2968Asp
chr5	73022182	TGATGACC	CGATGACC,CGATGACT	MODERATE	missense_variant	Fryl	p.Ser2961Gly
chr5	73057779	G	A	MODERATE	missense_variant	Fryl	p.Ala2218Val
chr5	73065253	G	A	MODERATE	missense_variant	Fryl	p.Thr1995Met
chr5	73065326	C	T	MODERATE	missense_variant	Fryl	p.Gly1971Ser
chr5	73097493	C	T	MODERATE	missense_variant	Fryl	p.Val869Ile
chr5	73303594	A	T	MODERATE	missense_variant&splice_region_variant	Ociad1	p.Ile66Phe
chr5	73423987	G	A	MODERATE	missense_variant	Cwh43	p.Gly420Asp
chr5	73607098	C	CT	HIGH	frameshift_variant	Lrrc66	p.Arg868fs
chr5	73607103	G	A	MODERATE	missense_variant	Lrrc66	p.Arg866Cys
chr5	73607338	TGT	CGC	MODERATE	missense_variant	Lrrc66	p.Thr787Ala
chr5	73607448	C	T	MODERATE	missense_variant	Lrrc66	p.Glu751Lys
chr5	73607720	G	A	MODERATE	missense_variant	Lrrc66	p.Pro660Leu
chr5	73607777	A	G	MODERATE	missense_variant	Lrrc66	p.Val641Ala
chr5	73608102	C	T	MODERATE	missense_variant	Lrrc66	p.Glu533Lys
chr5	73608141	C	G	MODERATE	missense_variant	Lrrc66	p.Ala520Pro
chr5	73608330	GCTCTGC	ACTCTGT	MODERATE	missense_variant	Lrrc66	p.AlaGluPro455ThrGluSer
chr5	73608632	T	C	MODERATE	missense_variant	Lrrc66	p.Glu356Gly
chr5	73608657	C	T	MODERATE	missense_variant	Lrrc66	p.Val348Ile
chr5	73608812	G	A	MODERATE	missense_variant	Lrrc66	p.Thr296Ile
chr5	73608836	T	G	MODERATE	missense_variant	Lrrc66	p.His288Pro
chr5	73610807	AAGAGGTA	CAGAGGTG	MODERATE	missense_variant	Lrrc66	p.IleThrSerSer261IleThrSerAla
chr5	73629642	GCT	ACA	MODERATE	missense_variant	Lrrc66	p.GlnPro121LeuSer
chr5	73629657	AGT	GGG	MODERATE	missense_variant	Lrrc66	p.TyrPhe116SerLeu
chr5	73629719	T	C	MODERATE	missense_variant	Lrrc66	p.Asp96Gly
chr5	73629752	C	A	MODERATE	missense_variant	Lrrc66	p.Arg85Leu
chr5	73629875	A	G	MODERATE	missense_variant	Lrrc66	p.Val44Ala
chr5	74206390	C	T	MODERATE	missense_variant	Scfd2	p.Met656Ile
chr5	74397736	G	T	MODERATE	missense_variant	Scfd2	p.Asp493Glu
chr5	74458569	C	T	MODERATE	missense_variant	Scfd2	p.Arg462His
chr5	74519523	T	C	MODERATE	missense_variant	Scfd2	p.Asn323Ser
chr5	74595972	G	A	MODERATE	missense_variant	Fip1l1	p.Ala578Thr
chr5	74627392	A	G	MODERATE	missense_variant	Lnx1	p.Val248Ala
chr5	74685665	G	T	MODERATE	missense_variant	Lnx1	p.Asp41Glu
chr5	75607078	T	G	MODERATE	missense_variant	Kit	p.His40Gln
chr5	75653313	C	G	MODERATE	missense_variant	Kit	p.Asp932Glu
chr5	75968840	G	T	MODERATE	missense_variant	Kdr	p.Ala129Asp
chr5	76147789	A	G	MODERATE	missense_variant	Srd5a3	p.Ser109Gly
chr5	76149753	C	T	MODERATE	missense_variant&splice_region_variant	Srd5a3	p.Ala134Val
chr5	76154682	C	T	MODERATE	missense_variant	Srd5a3	p.Ser298Phe
chr5	76227042	G	GGCT	MODERATE	inframe_insertion	Clock	p.Gln759dup
chr5	76545274	G	A	MODERATE	missense_variant	Exoc1	p.Val336Ile
chr5	76567157	GTAA	G	HIGH	splice_donor_variant&splice_region_variant&intron_variant	Exoc1
chr5	76594032	C	T	MODERATE	missense_variant	Cep135	p.Thr105Met
chr5	76624769	C	A	MODERATE	missense_variant	Cep135	p.Thr667Asn
chr5	76856878	A	G	MODERATE	missense_variant	C530008M17Rik	p.Lys362Arg
chr5	76857333	CGGG	GGGA	MODERATE	missense_variant	C530008M17Rik	p.ArgAsp514GlyAsn
chr5	76857369	G	C	MODERATE	missense_variant	C530008M17Rik	p.Asp526His
chr5	76858075	C	G	MODERATE	missense_variant	C530008M17Rik	p.Pro761Arg
chr5	76858200	G	A	MODERATE	missense_variant	C530008M17Rik	p.Gly803Ser
chr5	76867185	T	A	MODERATE	missense_variant	C530008M17Rik	p.Leu1186Gln
chr5	76877645	G	A	MODERATE	missense_variant	Aasdh	p.Thr929Met
chr5	76878462	A	G	MODERATE	missense_variant	Aasdh	p.Leu905Pro
chr5	76882602	T	C	MODERATE	missense_variant	Aasdh	p.Asn717Ser
chr5	76882736	G	C	MODERATE	missense_variant	Aasdh	p.Asn672Lys
chr5	76882776	C	T	MODERATE	missense_variant	Aasdh	p.Ser659Asn
chr5	76882839	C	A	MODERATE	missense_variant	Aasdh	p.Arg638Met
chr5	76882875	T	C	MODERATE	missense_variant	Aasdh	p.Asn626Ser
chr5	76882897	T	C	MODERATE	missense_variant	Aasdh	p.Ser619Gly
chr5	76882966	GCATG	ACACA	MODERATE	missense_variant	Aasdh	p.SerMetArg594SerValTrp
chr5	76884148	G	T	MODERATE	missense_variant	Aasdh	p.Gln543Lys
chr5	76886217	T	C	MODERATE	missense_variant	Aasdh	p.Ile496Val
chr5	76896567	CTCTGTCACCA	TTCTGTCACCG	MODERATE	missense_variant	Aasdh	p.LeuGlyAspArgAla155LeuGlyAspArgThr
chr5	76896593	CG	AC	MODERATE	missense_variant	Aasdh	p.Arg150Val
chr5	76901976	T	C	MODERATE	missense_variant	Aasdh	p.Ile58Val
chr5	76902000	T	A	MODERATE	missense_variant	Aasdh	p.Ile50Leu
chr5	76902048	A	T	MODERATE	missense_variant	Aasdh	p.Ser34Thr
chr5	76902101	T	G	MODERATE	missense_variant	Aasdh	p.Asp16Ala
chr5	76904207	A	G	HIGH	splice_donor_variant&intron_variant	Aasdh
chr5	76995852	G	C	MODERATE	missense_variant	Srp72	p.Gly526Ala
chr5	77061214	G	A	MODERATE	missense_variant	1700023E05Rik	p.Val428Ile
chr5	77268535	T	C	MODERATE	missense_variant	Rest	p.Ser199Pro
chr5	77281337	A	C	MODERATE	missense_variant	Rest	p.Glu534Asp
chr5	77281401	G	A	MODERATE	missense_variant	Rest	p.Gly556Ser
chr5	77281511	A	AAGT	MODERATE	disruptive_inframe_insertion	Rest	p.Ser593dup
chr5	77281584	G	A	MODERATE	missense_variant	Rest	p.Val617Met
chr5	77281899	T	TCTC	MODERATE	disruptive_inframe_insertion	Rest	p.Pro723dup
chr5	77282027	CGCTCAGAT	TGCTCAGAC	MODERATE	missense_variant	Rest	p.ProAlaGlnIle764ProAlaGlnThr
chr5	77282227	G	A	MODERATE	missense_variant	Rest	p.Ser831Asn
chr5	77282245	A	G	MODERATE	missense_variant	Rest	p.Asn837Ser
chr5	77282311	C	T	MODERATE	missense_variant	Rest	p.Thr859Ile
chr5	77282434	G	C	MODERATE	missense_variant	Rest	p.Arg900Pro
chr5	77282613	G	A	MODERATE	missense_variant	Rest	p.Ala960Thr
chr5	77306365	CA	TG	MODERATE	missense_variant	Noa1	p.Cys476His
chr5	77306446	C	G	MODERATE	missense_variant	Noa1	p.Arg449Thr
chr5	77309390	T	C	MODERATE	missense_variant	Noa1	p.Asn223Asp
chr5	77401522	T	C	MODERATE	missense_variant	Igfbp7	p.Asn178Ser
chr5	77401535	G	A	MODERATE	missense_variant	Igfbp7	p.Pro174Ser
chr5	77401557	T	G	MODERATE	missense_variant	Igfbp7	p.Gln166His
chr5	86045475	A	G	MODERATE	missense_variant	Cenpc1	p.Leu185Ser
chr5	86046553	G	A	MODERATE	missense_variant	Cenpc1	p.Ala118Val
chr5	86096582	A	T	MODERATE	missense_variant	Stap1	p.Asp274Val
chr5	87008180	C	T	MODERATE	missense_variant	Ugt2b35	p.Ala377Val
chr5	87008281	A	G	MODERATE	missense_variant	Ugt2b35	p.Thr411Ala
chr5	87092080	T	C	MODERATE	missense_variant	Ugt2b36	p.Ile149Val
chr5	87092385	T	A	MODERATE	missense_variant	Ugt2b36	p.Lys47Ile
chr5	87125308	A	C	MODERATE	missense_variant	Ugt2b5	p.Ser500Ala
chr5	87139788	GAT	AAG	MODERATE	missense_variant	Ugt2b5	p.Ile173Leu
chr5	87336835	T	C	MODERATE	missense_variant	Ugt2a3	p.Lys110Arg
chr5	88521320	G	A	MODERATE	missense_variant	Igj	p.Pro158Leu
chr5	88614937	ACAGATCCC	GCAGATCCT	HIGH	splice_acceptor_variant&splice_region_variant&synonymous_variant&intron_variant	Rufy3	p.Pro111Pro
chr5	88621315	T	C	MODERATE	missense_variant	Rufy3	p.Val246Ala
chr5	90219368	T	C	MODERATE	missense_variant	Cox18	p.His194Arg
chr5	90219492	T	C	MODERATE	missense_variant	Cox18	p.Ile153Val
chr5	90223699	T	C	MODERATE	missense_variant	Cox18	p.Ser81Gly
chr5	90253610	T	C	MODERATE	missense_variant	Ankrd17	p.Asn1632Asp
chr5	90283202	A	G	MODERATE	missense_variant	Ankrd17	p.Phe908Leu
chr5	90285505	A	G	MODERATE	missense_variant	Ankrd17	p.Ser734Pro
chr5	90468624	T	G	MODERATE	missense_variant	Alb	p.Ile329Met
chr5	90474607	G	T	MODERATE	missense_variant	Alb	p.Ala565Ser
chr5	90475298	C	A	MODERATE	missense_variant	Alb	p.Asp605Glu
chr5	90496117	C	T	MODERATE	missense_variant	Afp	p.Pro138Ser
chr5	90496144	C	T	MODERATE	missense_variant	Afp	p.His147Tyr
chr5	90759489	T	G	MODERATE	missense_variant	Cxcl5	p.Ile16Ser
chr5	90760456	C	A	MODERATE	missense_variant	Cxcl5	p.Asp114Glu
chr5	90946818	A	G	MODERATE	missense_variant	Mthfd2l	p.Asn49Asp
chr5	91020236	T	A	MODERATE	missense_variant	Mthfd2l	p.Leu330His
chr5	91020260	A	G	MODERATE	missense_variant	Mthfd2l	p.Tyr338Cys
chr5	91143534	A	G	MODERATE	missense_variant	Areg	p.Lys112Arg
chr5	91593902	C	T	MODERATE	missense_variant	Parm1	p.Thr43Ile
chr5	91593937	G	T	MODERATE	missense_variant	Parm1	p.Val55Leu
chr5	91594132	C	G	MODERATE	missense_variant	Parm1	p.His120Asp
chr5	92272470	T	C	MODERATE	missense_variant	Naaa	p.Asn163Asp
chr5	92288473	C	A	MODERATE	missense_variant	Sdad1	p.Glu670Asp
chr5	92291024	TCTGTATTA	GCTGTATTC	MODERATE	missense_variant	Sdad1	p.AspAsnThrGlu488GluAsnThrAla
chr5	92300161	C	G	MODERATE	missense_variant&splice_region_variant	Sdad1	p.Glu238Asp
chr5	92325099	T	G	MODERATE	missense_variant	Cxcl9	p.Asn80His
chr5	92326856	C	G	MODERATE	missense_variant	Cxcl9	p.Ala28Pro
chr5	92348796	C	T	MODERATE	missense_variant	Cxcl10	p.Val7Ile
chr5	92363176	T	TG	HIGH	frameshift_variant	Cxcl11	p.Ser14fs
chr5	92430804	T	TCTG	MODERATE	inframe_insertion	Nup54	p.Gln100dup
chr5	92941176	CGT	GGA	MODERATE	missense_variant	Shroom3	p.AlaCys595GlySer
chr5	92941217	G	A	MODERATE	missense_variant	Shroom3	p.Ala609Thr
chr5	92941253	C	G	MODERATE	missense_variant	Shroom3	p.Leu621Val
chr5	92941440	A	C	MODERATE	missense_variant	Shroom3	p.Gln683Pro
chr5	92941451	C	T	MODERATE	missense_variant	Shroom3	p.Pro687Ser
chr5	92942961	A	G	MODERATE	missense_variant	Shroom3	p.Glu1190Gly
chr5	92948429	A	G	MODERATE	missense_variant	Shroom3	p.Asn1258Ser
chr5	92950532	GCACCACCCTA	CCACCACCCTT	MODERATE	missense_variant	Shroom3	p.LeuHisHisProThr1290LeuHisHisProSer
chr5	92950864	G	A	MODERATE	missense_variant	Shroom3	p.Gly1401Glu
chr5	92950981	C	T	MODERATE	missense_variant	Shroom3	p.Ala1440Val
chr5	92951014	G	T	MODERATE	missense_variant	Shroom3	p.Arg1451Leu
chr5	92951133	A	G	MODERATE	missense_variant	Shroom3	p.Met1491Val
chr5	92952562	T	C	MODERATE	missense_variant	Shroom3	p.Met1561Thr
chr5	92952770	GAGAA	CAGAT	MODERATE	missense_variant	Shroom3	p.GluArgThr1630AspArgSer
chr5	92964663	G	C	MODERATE	missense_variant	Shroom3	p.Gly1961Ala
chr5	93042590	C	G	MODERATE	missense_variant	Sowahb	p.Glu757Gln
chr5	93042822	G	T	MODERATE	missense_variant	Sowahb	p.Asn679Lys
chr5	93043363	G	T	MODERATE	missense_variant	Sowahb	p.Ser499Tyr
chr5	93187797	C	T	MODERATE	missense_variant	Ccni	p.Ala161Thr
chr5	95959958	A	G	MODERATE	missense_variant	Cxcl13	p.Gln91Arg
chr5	96210187	C	T	MODERATE	missense_variant	Mrpl1	p.Arg9Cys
chr5	96213810	T	A	MODERATE	missense_variant	Mrpl1	p.Cys19Ser
chr5	96213855	G	A	MODERATE	missense_variant	Mrpl1	p.Val34Met
chr5	96374876	A	C	MODERATE	missense_variant	Fras1	p.Asn22His
chr5	96559948	A	G	MODERATE	missense_variant	Fras1	p.Ile349Val
chr5	96614775	T	C	MODERATE	missense_variant&splice_region_variant	Fras1	p.Val712Ala
chr5	96614861	TGCTGCGTCTCCCA	CGCTGCATCTCCCG	MODERATE	missense_variant	Fras1	p.CysCysValSerGln741ArgCysIleSerArg
chr5	96618436	A	G	MODERATE	missense_variant	Fras1	p.Thr785Ala
chr5	96636732	C	G	MODERATE	missense_variant&splice_region_variant	Fras1	p.Thr858Arg
chr5	96645098	G	A	MODERATE	missense_variant	Fras1	p.Ala963Thr
chr5	96645131	C	G	MODERATE	missense_variant	Fras1	p.Gln974Glu
chr5	96647507	A	G	MODERATE	missense_variant	Fras1	p.Gln1053Arg
chr5	96650523	A	G	MODERATE	missense_variant	Fras1	p.Asp1131Gly
chr5	96677285	G	A	MODERATE	missense_variant	Fras1	p.Ala1445Thr
chr5	96700202	T	C	MODERATE	missense_variant	Fras1	p.Leu1757Pro
chr5	96700226	G	A	MODERATE	missense_variant	Fras1	p.Arg1765Lys
chr5	96700242	C	A	MODERATE	missense_variant	Fras1	p.Asp1770Glu
chr5	96700296	G	C	MODERATE	missense_variant	Fras1	p.Lys1788Asn
chr5	96714020	G	A	MODERATE	missense_variant	Fras1	p.Ser2171Asn
chr5	96714362	C	T	MODERATE	missense_variant	Fras1	p.Ser2200Phe
chr5	96714386	G	A	MODERATE	missense_variant	Fras1	p.Arg2208Lys
chr5	96726946	C	A	MODERATE	missense_variant	Fras1	p.Arg2323Ser
chr5	96728566	G	T	MODERATE	missense_variant	Fras1	p.Arg2386Leu
chr5	96739227	G	A	MODERATE	missense_variant	Fras1	p.Gly2623Ser
chr5	96739263	GAT	AAC	MODERATE	missense_variant	Fras1	p.Asp2635Asn
chr5	96739350	G	A	MODERATE	missense_variant	Fras1	p.Val2664Ile
chr5	96749522	A	G	MODERATE	missense_variant	Fras1	p.Ile2937Val
chr5	96749659	GC	AG	MODERATE	missense_variant	Fras1	p.GlyGln2982GlyGlu
chr5	96758142	T	C	MODERATE	missense_variant	Fras1	p.Leu3135Pro
chr5	96758165	G	A	MODERATE	missense_variant	Fras1	p.Val3143Met
chr5	96764986	A	G	MODERATE	missense_variant	Fras1	p.Gln3383Arg
chr5	96768291	A	G	MODERATE	missense_variant	Fras1	p.Asn3395Asp
chr5	96812856	A	G	MODERATE	missense_variant	Anxa3	p.Thr40Ala
chr5	96812908	T	C	MODERATE	missense_variant	Anxa3	p.Val57Ala
chr5	96820450	T	A	MODERATE	missense_variant	Anxa3	p.Ser121Thr
chr5	96828402	CAGGT	C	HIGH	frameshift_variant&splice_donor_variant&splice_region_variant&intron_variant	Anxa3	p.Gln180fs
chr5	97061608	ACAACAG	A	MODERATE	disruptive_inframe_deletion	Bmp2k	p.Gln480_Gln481del
chr5	97074682	CGC	TGT	MODERATE	missense_variant	Bmp2k	p.ProAla654ProVal
chr5	97087265	C	T	MODERATE	missense_variant	Bmp2k	p.Ala849Val
chr5	97455946	TTCCCCT	ATCCCCC	MODERATE	missense_variant	Gk2	p.SerGlyGlu342SerGlyAsp
chr5	97456730	G	T	MODERATE	missense_variant	Gk2	p.Ser83Tyr
chr5	97960684	C	T	MODERATE	missense_variant	Antxr2	p.Val323Ile
chr5	98879795	G	A	MODERATE	missense_variant	Bmp3	p.Val425Ile
chr5	99024731	C	T	MODERATE	missense_variant	Prkg2	p.Ala42Thr
chr5	100063879	G	C	MODERATE	missense_variant	Enoph1	p.Val212Leu
chr5	100454439	T	G	MODERATE	missense_variant	Lin54	p.Lys413Thr
chr5	100454496	ACC	GCT	MODERATE	missense_variant	Lin54	p.ValVal393ValAla
chr5	100454509	CT	C	HIGH	splice_acceptor_variant&intron_variant	Lin54
chr5	100661873	C	T	MODERATE	missense_variant	Coq2	p.Val198Met
chr5	100719470	C	T	MODERATE	missense_variant	Hpse	p.Arg42Gln
chr5	100771738	T	C	MODERATE	missense_variant	Helq	p.Lys849Arg
chr5	100774010	C	T	MODERATE	missense_variant	Helq	p.Cys776Tyr
chr5	100778820	C	T	MODERATE	missense_variant	Helq	p.Ser695Asn
chr5	100779195	G	A	MODERATE	missense_variant	Helq	p.Ala675Val
chr5	100787021	G	A	MODERATE	missense_variant	Helq	p.Ala501Val
chr5	100791815	T	C	MODERATE	missense_variant	Helq	p.Ser411Gly
chr5	100796633	C	G	MODERATE	missense_variant	Helq	p.Glu204Gln
chr5	100796656	A	G	MODERATE	missense_variant	Helq	p.Val196Ala
chr5	100796668	T	A	MODERATE	missense_variant	Helq	p.His192Leu
chr5	100796693	TTGTCTT	CTGTCTC	MODERATE	missense_variant	Helq	p.LysThrAsn182GluThrAsp
chr5	100799560	A	C	MODERATE	missense_variant	Mrps18c	p.Ile34Leu
chr5	100806230	G	C	MODERATE	missense_variant	Fam175a	p.His351Gln
chr5	101848391	T	C	MODERATE	missense_variant	Wdfy3	p.Met3202Val
chr5	101888094	C	T	MODERATE	missense_variant	Wdfy3	p.Ala2153Thr
chr5	102552157	G	C	MODERATE	missense_variant	Arhgap24	p.Arg4Ser
chr5	103501481	G	A	MODERATE	missense_variant	Ptpn13	p.Arg250Gln
chr5	103501590	G	T	MODERATE	missense_variant	Ptpn13	p.Met286Ile
chr5	103501685	G	A	MODERATE	missense_variant	Ptpn13	p.Arg318His
chr5	103525932	A	C	HIGH	splice_acceptor_variant&intron_variant	Ptpn13
chr5	103541283	A	T	MODERATE	missense_variant	Ptpn13	p.Met981Leu
chr5	103554804	G	A	MODERATE	missense_variant	Ptpn13	p.Arg1212Gln
chr5	103555144	GT	AC	MODERATE	missense_variant	Ptpn13	p.ThrSer1325ThrPro
chr5	103556137	C	T	MODERATE	missense_variant	Ptpn13	p.Ser1345Leu
chr5	103559969	A	C	MODERATE	missense_variant	Ptpn13	p.Arg1465Ser
chr5	103559985	G	A	MODERATE	missense_variant	Ptpn13	p.Val1471Met
chr5	103562123	C	T	MODERATE	missense_variant	Ptpn13	p.Pro1551Ser
chr5	103568164	G	C	MODERATE	missense_variant	Ptpn13	p.Ala1806Pro
chr5	103573111	TACA	T	MODERATE	disruptive_inframe_deletion	Ptpn13	p.Thr1949del
chr5	103575121	C	T	MODERATE	missense_variant	Ptpn13	p.Pro1977Leu
chr5	103578895	A	G	MODERATE	missense_variant	Ptpn13	p.Glu1991Gly
chr5	103578910	C	G	MODERATE	missense_variant	Ptpn13	p.Ala1996Gly
chr5	103582748	A	G	MODERATE	missense_variant	Ptpn13	p.Ser2092Gly
chr5	103617708	C	T	MODERATE	missense_variant	Slc10a6	p.Val170Met
chr5	103629226	T	C	MODERATE	missense_variant	Slc10a6	p.Thr3Ala
chr5	103783890	C	T	MODERATE	missense_variant	Aff1	p.Pro133Ser
chr5	103784238	G	A	MODERATE	missense_variant	Aff1	p.Gly249Ser
chr5	103784410	T	C	MODERATE	missense_variant	Aff1	p.Leu306Pro
chr5	103811067	C	T	MODERATE	missense_variant	Aff1	p.Pro342Leu
chr5	103833632	T	C	MODERATE	missense_variant	Aff1	p.Ser554Pro
chr5	103833645	T	C	MODERATE	missense_variant	Aff1	p.Leu558Pro
chr5	103846303	TCA	ACG	MODERATE	missense_variant	Aff1	p.Ser1020Thr
chr5	103846336	G	A	MODERATE	missense_variant	Aff1	p.Ala1031Thr
chr5	103886086	A	G	MODERATE	missense_variant	Klhl8	p.Tyr22His
chr5	103967032	G	T	MODERATE	missense_variant	Hsd17b13	p.Gln212Lys
chr5	103977279	C	T	MODERATE	missense_variant	Hsd17b13	p.Val13Ile
chr5	104065090	A	G	MODERATE	missense_variant	Nudt9	p.His343Arg
chr5	104089661	C	T	MODERATE	missense_variant	Sparcl1	p.Gly436Glu
chr5	104092802	T	G	MODERATE	missense_variant	Sparcl1	p.Gln252Pro
chr5	104093029	G	T	MODERATE	missense_variant	Sparcl1	p.Asp176Glu
chr5	104093100	T	C	MODERATE	missense_variant	Sparcl1	p.Lys153Glu
chr5	104093138	T	A	MODERATE	missense_variant	Sparcl1	p.Tyr140Phe
chr5	104094646	C	T	MODERATE	missense_variant	Sparcl1	p.Ser59Asn
chr5	104436571	G	GAGA	HIGH	stop_gained&disruptive_inframe_insertion	Spp1	p.Ser43delinsTerAla
chr5	104439350	G	A	MODERATE	missense_variant	Spp1	p.Ser117Asn
chr5	104439415	G	T	MODERATE	missense_variant	Spp1	p.Val139Phe
chr5	104439475	A	G	MODERATE	missense_variant	Spp1	p.Asn159Asp
chr5	104440244	G	T	MODERATE	missense_variant	Spp1	p.Asp188Tyr
chr5	104440295	G	A	MODERATE	missense_variant	Spp1	p.Asp205Asn
chr5	104440353	A	G	MODERATE	missense_variant	Spp1	p.Lys224Arg
chr5	104440405	ACTTGAG	CCTTGAA	MODERATE	missense_variant	Spp1	p.ArgLeuGlu241SerLeuGlu
chr5	104440429	G	C	MODERATE	missense_variant	Spp1	p.Gln249His
chr5	104440562	T	C	MODERATE	missense_variant	Spp1	p.Tyr294His
chr5	104466919	C	G	MODERATE	missense_variant	Pkd2	p.Ala209Gly
chr5	104480156	G	C	MODERATE	missense_variant	Pkd2	p.Met365Ile
chr5	104480170	A	G	MODERATE	missense_variant	Pkd2	p.Lys370Arg
chr5	104486782	AG	GC	MODERATE	missense_variant	Pkd2	p.Ser560Ala
chr5	104503611	C	T	MODERATE	missense_variant	Pkd2	p.Pro942Ser
chr5	104517635	G	C	MODERATE	missense_variant	BC005561	p.Val8Leu
chr5	104518017	G	A	MODERATE	missense_variant	BC005561	p.Gly135Glu
chr5	104518395	A	G	MODERATE	missense_variant	BC005561	p.Asn261Ser
chr5	104521303	ACGAGAAAGAG	GCGAGAAAGAT	MODERATE	missense_variant	BC005561	p.SerArgGluArgAla1230SerArgGluArgSer
chr5	104521432	CAAAGAG	C	MODERATE	disruptive_inframe_deletion	BC005561	p.Lys1278_Glu1279del
chr5	104521644	T	C	MODERATE	missense_variant	BC005561	p.Ile1344Thr
chr5	104521704	A	G	MODERATE	missense_variant	BC005561	p.Lys1364Arg
chr5	105015020	GT	G	HIGH	frameshift_variant	Gbp8	p.Lys502fs
chr5	105017807	C	A	MODERATE	missense_variant	Gbp8	p.Asp327Tyr
chr5	105018692	CGCTGGA	TGCTGGG	MODERATE	missense_variant	Gbp8	p.ValGlnArg255AlaGlnGln
chr5	105018728	C	T	MODERATE	missense_variant	Gbp8	p.Arg245Lys
chr5	105031281	ACTG	GCCA	MODERATE	missense_variant	Gbp8	p.LeuSer116LeuGly
chr5	105050882	G	T	MODERATE	missense_variant	Gbp8	p.Leu56Met
chr5	105080134	T	C	MODERATE	missense_variant	Gbp9	p.Lys594Arg
chr5	105083766	C	T	MODERATE	missense_variant	Gbp9	p.Arg318Gln
chr5	105094213	GTGGGGATTTC	ATGGGGATTTG	MODERATE	missense_variant	Gbp9	p.ArgAsnProHis156ProAsnProHis
chr5	105118483	C	A	MODERATE	missense_variant	Gbp4	p.Arg564Leu
chr5	105121898	T	G	MODERATE	missense_variant	Gbp4	p.Ile355Leu
chr5	105122952	G	C	MODERATE	missense_variant	Gbp4	p.Ala271Gly
chr5	105122967	G	T	MODERATE	missense_variant	Gbp4	p.Thr266Lys
chr5	105125550	T	C	MODERATE	missense_variant	Gbp4	p.Asn138Ser
chr5	105135107	A	AGGGT	HIGH	frameshift_variant	Gbp4	p.Leu99fs
chr5	105135129	G	T	MODERATE	missense_variant	Gbp4	p.Pro92Thr
chr5	105606949	G	A	MODERATE	missense_variant	Lrrc8c	p.Gly197Ser
chr5	105811948	A	G	MODERATE	missense_variant	Lrrc8d	p.Ile75Val
chr5	105812086	T	C	MODERATE	missense_variant	Lrrc8d	p.Ser121Pro
chr5	105914747	G	A	MODERATE	missense_variant	Zfp326	p.Gly494Asp
chr5	106634840	C	T	MODERATE	missense_variant	Zfp644	p.Val1192Met
chr5	106636537	T	C	MODERATE	missense_variant	Zfp644	p.Ser715Gly
chr5	106637621	TCCAC	CCCAT	MODERATE	missense_variant	Zfp644	p.GlyGly352AspGly
chr5	106637681	C	T	MODERATE	missense_variant	Zfp644	p.Met333Ile
chr5	106637973	T	C	MODERATE	missense_variant	Zfp644	p.Asp236Gly
chr5	106638048	T	C	MODERATE	missense_variant	Zfp644	p.Asn211Ser
chr5	106638550	C	T	MODERATE	missense_variant	Zfp644	p.Asp44Asn
chr5	106638629	CT	AC	MODERATE	missense_variant	Zfp644	p.Lys17Ser
chr5	106975543	C	T	MODERATE	missense_variant	Cdc7	p.Thr318Met
chr5	106983207	A	G	MODERATE	missense_variant	Cdc7	p.Lys516Arg
chr5	107121372	G	C	MODERATE	missense_variant	Tgfbr3	p.Pro772Ala
chr5	107121392	AT	GG	MODERATE	missense_variant	Tgfbr3	p.Met765Pro
chr5	107177909	G	A	MODERATE	missense_variant	Tgfbr3	p.His96Tyr
chr5	107452170	T	C	MODERATE	missense_variant	Btbd8	p.Cys176Arg
chr5	107570241	T	G	MODERATE	missense_variant	Glmn	p.Tyr270Ser
chr5	107620365	C	G	MODERATE	missense_variant	Rpap2	p.His356Gln
chr5	107623715	GTGAC	ATGAT	MODERATE	missense_variant	Rpap2	p.ArgAsp491HisAsp
chr5	108332093	T	G	MODERATE	missense_variant	Pigg	p.His411Gln
chr5	108332874	T	C	MODERATE	missense_variant	Pigg	p.Val500Ala
chr5	108336324	A	G	MODERATE	missense_variant	Pigg	p.Glu604Gly
chr5	108336344	CTTGCCT	C	MODERATE	disruptive_inframe_deletion	Pigg	p.Leu611_Cys613delinsArg
chr5	108341898	A	G	MODERATE	missense_variant	Pigg	p.Thr782Ala
chr5	108572066	C	T	MODERATE	missense_variant	Gak	p.Ala1101Thr
chr5	108604334	T	G	MODERATE	missense_variant	Gak	p.Thr353Pro
chr5	108648762	T	A	MODERATE	missense_variant	Dgkq	p.Asn918Ile
chr5	108650236	T	G	MODERATE	missense_variant	Dgkq	p.Thr719Pro
chr5	108681777	G	A	MODERATE	missense_variant	Idua	p.Arg502His
chr5	108682001	A	G	MODERATE	missense_variant	Idua	p.Thr541Ala
chr5	110106771	ACTCCAGC	TCTCCAGT	MODERATE	missense_variant	Gtpbp6	p.GluLeuGluSer177GluLeuGluThr
chr5	110136077	G	C	MODERATE	missense_variant	Chfr	p.Glu6Gln
chr5	110143656	A	T	MODERATE	missense_variant	Chfr	p.Glu113Asp
chr5	110144811	G	C	MODERATE	missense_variant	Chfr	p.Cys148Ser
chr5	110144837	C	T	MODERATE	missense_variant	Chfr	p.Pro157Ser
chr5	110144874	G	A	MODERATE	missense_variant	Chfr	p.Cys169Tyr
chr5	110146502	C	T	MODERATE	missense_variant	Chfr	p.Arg218Cys
chr5	110203750	T	A	MODERATE	missense_variant	Golga3	p.Leu790Met
chr5	110207605	T	A	MODERATE	missense_variant	Golga3	p.Ser942Thr
chr5	110217933	G	A	MODERATE	missense_variant	Golga3	p.Gly1238Glu
chr5	110218129	A	T	MODERATE	missense_variant	Golga3	p.Glu1253Asp
chr5	110234571	A	G	MODERATE	missense_variant	Ankle2	p.Thr138Ala
chr5	110234721	A	G	MODERATE	missense_variant	Ankle2	p.Thr188Ala
chr5	110236414	A	G	MODERATE	missense_variant	Ankle2	p.Asn268Ser
chr5	110238001	A	G	MODERATE	missense_variant	Ankle2	p.Met374Val
chr5	110250791	A	G	MODERATE	missense_variant	Ankle2	p.Ile569Val
chr5	110253081	A	C	MODERATE	missense_variant	Ankle2	p.His761Pro
chr5	110297856	A	G	MODERATE	missense_variant	Pole	p.Met533Val
chr5	110318346	C	G	MODERATE	missense_variant	Pole	p.Pro1305Ala
chr5	110337027	A	G	MODERATE	missense_variant	Pole	p.Thr2240Ala
chr5	110649547	C	T	MODERATE	missense_variant	Noc4l	p.Arg407His
chr5	110651405	A	C	MODERATE	missense_variant	Noc4l	p.His170Gln
chr5	110655892	C	G	MODERATE	missense_variant	Ddx51	p.Leu385Val
chr5	110657314	C	T	MODERATE	missense_variant	Ddx51	p.Pro608Ser
chr5	110676525	T	C	MODERATE	missense_variant	Ep400	p.Thr2481Ala
chr5	110676531	CCTGGGG	C	MODERATE	inframe_deletion	Ep400	p.Pro2477_Gln2478del
chr5	110685084	A	C	MODERATE	missense_variant	Ep400	p.Ile2063Ser
chr5	110756244	T	C	MODERATE	missense_variant	Ep400	p.Asn163Ser
chr5	110787203	C	T	MODERATE	missense_variant	Ulk1	p.Val949Ile
chr5	110790870	A	G	MODERATE	missense_variant	Ulk1	p.Val529Ala
chr5	110839583	A	G	MODERATE	missense_variant	Hscb	p.Val49Ala
chr5	110873486	A	G	MODERATE	missense_variant	Chek2	p.Ser521Gly
chr5	112327482	TAGGA	CAGGT	HIGH	splice_acceptor_variant&splice_region_variant&5_prime_UTR_variant&intron_variant	Tfip11
chr5	112340027	G	C	MODERATE	missense_variant	Srrd	p.Ala96Gly
chr5	112370197	G	A	MODERATE	missense_variant	Hps4	p.Arg352Gln
chr5	112370343	CACCCTTG	GACCCTTC	MODERATE	missense_variant	Hps4	p.HisProCys401AspProSer
chr5	112370720	C	A	MODERATE	missense_variant	Hps4	p.Ser526Arg
chr5	112375370	A	G	MODERATE	missense_variant	Hps4	p.Thr585Ala
chr5	112920043	C	T	MODERATE	missense_variant	Adrbk2	p.Arg540Lys
chr5	113093203	G	C	MODERATE	missense_variant	2900026A02Rik	p.Asp249Glu
chr5	113095643	C	T	MODERATE	missense_variant	2900026A02Rik	p.Arg178Gln
chr5	113258101	AT	A	HIGH	frameshift_variant	Sgsm1	p.Ile1035fs
chr5	113258152	CA	TG	MODERATE	missense_variant	Sgsm1	p.Cys1018His
chr5	113570751	C	T	MODERATE	missense_variant	Wscd2	p.Thr272Ile
chr5	113614488	T	C	MODERATE	missense_variant	Cmklr1	p.Ile151Val
chr5	113737021	T	G	MODERATE	missense_variant	Ficd	p.His50Gln
chr5	113744566	G	C	MODERATE	missense_variant	Sart3	p.Leu898Val
chr5	113746665	T	G	MODERATE	missense_variant	Sart3	p.Glu626Ala
chr5	113795065	T	C	MODERATE	missense_variant	Tmem119	p.Lys225Arg
chr5	113795252	T	A	MODERATE	missense_variant	Tmem119	p.Thr163Ser
chr5	113795554	T	C	MODERATE	missense_variant	Tmem119	p.Glu62Gly
chr5	113819318	T	C	MODERATE	missense_variant	Selplg	p.Asn309Ser
chr5	113942766	GTGCGGGCTCC	TTACAGGCTCT	MODERATE	missense_variant	Ssh1	p.GlnGluProAlaHis864GlnGluProValAsn
chr5	113946436	G	A	MODERATE	missense_variant	Ssh1	p.Pro581Leu
chr5	113946600	T	A	MODERATE	missense_variant	Ssh1	p.Glu526Asp
chr5	114019018	A	AGAG	MODERATE	disruptive_inframe_insertion	Dao	p.Gly172dup
chr5	114124195	G	A	MODERATE	missense_variant	Alkbh2	p.Pro158Leu
chr5	114132238	C	G	MODERATE	missense_variant	Ung	p.Gln126Glu
chr5	114165636	A	G	MODERATE	missense_variant	Acacb	p.Asn40Ser
chr5	114165681	G	A	MODERATE	missense_variant	Acacb	p.Gly55Glu
chr5	114165708	A	G	MODERATE	missense_variant	Acacb	p.His64Arg
chr5	114165780	G	A	MODERATE	missense_variant	Acacb	p.Arg88Lys
chr5	114165852	C	G	MODERATE	missense_variant	Acacb	p.Ala112Gly
chr5	114387496	A	G	MODERATE	missense_variant	Ube3b	p.Ser93Gly
chr5	114450794	G	T	MODERATE	missense_variant	Mvk	p.Ala154Ser
chr5	114452895	T	A	MODERATE	missense_variant	Mvk	p.Phe216Tyr
chr5	114611691	T	C	MODERATE	missense_variant	Fam222a	p.Ile316Thr
chr5	114628960	C	G	MODERATE	missense_variant	Trpv4	p.Val558Leu
chr5	114644868	G	A	MODERATE	missense_variant	Trpv4	p.Ala11Val
chr5	114709446	G	A	MODERATE	missense_variant	Tchp	p.Gly109Ser
chr5	114899943	G	A	MODERATE	missense_variant	Oasl2	p.Ala134Thr
chr5	114911131	T	A	MODERATE	missense_variant	Oasl2	p.Phe431Ile
chr5	114911188	A	G	MODERATE	missense_variant	Oasl2	p.Thr450Ala
chr5	114911311	A	G	MODERATE	missense_variant	Oasl2	p.Lys491Glu
chr5	114935925	A	G	MODERATE	missense_variant	Oasl1	p.Ile298Val
chr5	114936048	G	A	MODERATE	missense_variant	Oasl1	p.Val339Ile
chr5	114936948	G	C	MODERATE	missense_variant	Oasl1	p.Glu356Gln
chr5	114936960	T	C	MODERATE	missense_variant	Oasl1	p.Ser360Pro
chr5	114937030	A	G	MODERATE	missense_variant	Oasl1	p.Gln383Arg
chr5	114937069	C	T	MODERATE	missense_variant	Oasl1	p.Pro396Leu
chr5	114937335	T	C	MODERATE	missense_variant	Oasl1	p.Phe485Leu
chr5	114937384	C	T	MODERATE	missense_variant	Oasl1	p.Thr501Met
chr5	114945809	A	G	MODERATE	missense_variant	2210016L21Rik	p.Thr58Ala
chr5	114946347	T	C	MODERATE	missense_variant	2210016L21Rik	p.Val116Ala
chr5	114947878	G	A	MODERATE	missense_variant	2210016L21Rik	p.Val218Ile
chr5	115246931	G	A	MODERATE	missense_variant	Rnf10	p.Arg606Cys
chr5	115249002	CA	TG	MODERATE	missense_variant	Rnf10	p.ThrVal475ThrIle
chr5	115334581	C	A	MODERATE	missense_variant	Gatc	p.Leu142Phe
chr5	115341029	G	A	MODERATE	missense_variant	Gatc	p.Arg41Cys
chr5	115341043	C	T	MODERATE	missense_variant	Gatc	p.Gly36Glu
chr5	115479614	AACTC	GTCTG	MODERATE	missense_variant	Sirt4	p.LeuSerSer326LeuArgPro
chr5	115479629	T	C	MODERATE	missense_variant	Sirt4	p.Asn323Asp
chr5	115479664	C	T	MODERATE	missense_variant	Sirt4	p.Arg311Gln
chr5	115480474	T	G	MODERATE	missense_variant	Sirt4	p.Glu180Asp
chr5	115545431	G	A	MODERATE	missense_variant	Pxn	p.Gly139Asp
chr5	115552219	A	G	MODERATE	missense_variant	Pxn	p.Lys407Arg
chr5	115552252	A	G	MODERATE	missense_variant	Pxn	p.Tyr418Cys
chr5	115562558	A	G	MODERATE	missense_variant	Rplp0	p.Thr262Ala
chr5	115619657	G	A	MODERATE	missense_variant	Gcn1l1	p.Val2474Ile
chr5	115620210	A	G	MODERATE	missense_variant	Gcn1l1	p.Ser2544Gly
chr5	115656004	C	A	MODERATE	missense_variant	Ccdc64	p.Ala449Ser
chr5	115662712	ACC	GCT	MODERATE	missense_variant	Ccdc64	p.Gly435Ser
chr5	115663782	AGCCGA	GGCCGA,GGCCGC	MODERATE	missense_variant	Ccdc64	p.SerAla340AlaAla
chr5	115851288	A	G	MODERATE	missense_variant	Cit	p.Gln78Arg
chr5	116021501	T	C	MODERATE	missense_variant	Prkab1	p.Lys102Arg
chr5	116021541	TTCCA	CCCCG	MODERATE	missense_variant	Prkab1	p.GlyGlyLys87GlyGlyGlu
chr5	117193727	A	G	MODERATE	missense_variant	Taok3	p.Lys3Arg
chr5	117323506	A	G	MODERATE	missense_variant	Vsig10	p.Gln23Arg
chr5	117323527	G	T	MODERATE	missense_variant	Vsig10	p.Arg30Leu
chr5	117324963	G	A	MODERATE	missense_variant	Vsig10	p.Ala85Thr
chr5	117324979	T	C	MODERATE	missense_variant	Vsig10	p.Phe90Ser
chr5	117351616	GGAA	G	MODERATE	disruptive_inframe_deletion	Vsig10	p.Glu486del
chr5	117351789	A	C	MODERATE	missense_variant&splice_region_variant	Vsig10	p.Gln540Pro
chr5	117383413	T	C	MODERATE	missense_variant	Rfc5	p.His187Arg
chr5	118259027	G	A	MODERATE	missense_variant	2410131K14Rik	p.Ser107Asn
chr5	118726299	C	G	MODERATE	missense_variant	Med13l	p.Ala400Gly
chr5	118731440	A	C	MODERATE	missense_variant	Med13l	p.Glu814Asp
chr5	118748755	A	G	MODERATE	missense_variant	Med13l	p.Thr1574Ala
chr5	118761320	C	G	MODERATE	missense_variant	Med13l	p.Thr2138Ser
chr5	119678717	G	C	MODERATE	missense_variant	Tbx3	p.Glu326Asp
chr5	120123069	C	T	MODERATE	missense_variant	Rbm19	p.Pro253Ser
chr5	120140280	AGAG	A	MODERATE	disruptive_inframe_deletion	Rbm19	p.Glu716del
chr5	120463196	C	T	MODERATE	missense_variant	Sdsl	p.Ala4Thr
chr5	120521123	A	G	MODERATE	missense_variant	Slc8b1	p.Thr228Ala
chr5	120524059	GTGAGGCCGGGCA	G	HIGH	splice_donor_variant&splice_region_variant&intron_variant	Slc8b1
chr5	120524234	G	A	MODERATE	missense_variant	Slc8b1	p.Arg298Gln
chr5	120530310	ATGCAGATGCC	GTACAGATGCG	HIGH	splice_acceptor_variant&splice_region_variant&synonymous_variant&intron_variant	Slc8b1	p.Ala472Ala
chr5	120532917	A	G	MODERATE	missense_variant	Slc8b1	p.Ile540Val
chr5	120532995	A	G	MODERATE	missense_variant	Slc8b1	p.Ile566Val
chr5	120536116	CA	TG	MODERATE	missense_variant	Tpcn1	p.ThrVal815ThrIle
chr5	120543400	G	A	MODERATE	missense_variant	Tpcn1	p.Leu528Phe
chr5	120557940	G	C	MODERATE	missense_variant	Tpcn1	p.Gln83Glu
chr5	120609556	A	G	MODERATE	missense_variant	Rita1	p.Ser226Pro
chr5	120609706	A	G	MODERATE	missense_variant	Rita1	p.Cys176Arg
chr5	120623578	A	G	MODERATE	missense_variant	Ddx54	p.Asp473Gly
chr5	120758844	A	G	MODERATE	missense_variant	Oas3	p.Met904Thr
chr5	120758864	A	C	MODERATE	missense_variant	Oas3	p.His897Gln
chr5	120761698	C	T	MODERATE	missense_variant	Oas3	p.Arg707Gln
chr5	120766175	G	T	MODERATE	missense_variant	Oas3	p.Gln545Lys
chr5	120769111	T	C	MODERATE	missense_variant	Oas3	p.Lys487Arg
chr5	120769312	T	C	MODERATE	missense_variant	Oas3	p.Gln420Arg
chr5	120769345	A	C	MODERATE	missense_variant	Oas3	p.Ile409Ser
chr5	120769360	T	C	MODERATE	missense_variant	Oas3	p.Asn404Ser
chr5	120769403	C	T	MODERATE	missense_variant	Oas3	p.Glu390Lys
chr5	120769435	T	A	MODERATE	missense_variant	Oas3	p.Gln379Leu
chr5	120769488	C	A	MODERATE	missense_variant	Oas3	p.Gln361His
chr5	120772885	T	C	MODERATE	missense_variant	Oas3	p.His210Arg
chr5	120774134	G	A	MODERATE	missense_variant	Oas3	p.Arg64Trp
chr5	120777495	T	C	MODERATE	missense_variant	Oas3	p.Arg44Gly
chr5	120777510	T	C	MODERATE	missense_variant	Oas3	p.Thr39Ala
chr5	120885836	G	T	MODERATE	missense_variant	Oas1g	p.Leu137Met
chr5	120885901	CGTCTCTC	TGTCTCTC,TGTCTCTT	MODERATE	missense_variant	Oas1g	p.GluArgArg113LysArgHis
chr5	120886024	C	T	MODERATE	missense_variant	Oas1g	p.Arg74Lys
chr5	120887528	G	T	MODERATE	missense_variant	Oas1g	p.Thr12Lys
chr5	120905724	CGTCTCTC	TGTCTCTC,TGTCTCTT	MODERATE	missense_variant	Oas1a	p.GluArgArg113LysArgHis
chr5	120907331	C	T	MODERATE	missense_variant	Oas1a	p.Gly49Asp
chr5	120907355	A	G	MODERATE	missense_variant	Oas1a	p.Phe41Ser
chr5	121349514	T	C	MODERATE	missense_variant	Gm15800	p.Val3524Ala
chr5	121375243	T	A	MODERATE	missense_variant	Trafd1	p.Ser311Cys
chr5	121436700	G	A	MODERATE	missense_variant	Naa25	p.Ala806Thr
chr5	121439847	A	G	MODERATE	missense_variant	Naa25	p.Lys939Arg
chr5	121445095	T	C	MODERATE	missense_variant	Erp29	p.Glu256Gly
chr5	121445458	T	C	MODERATE	missense_variant	Erp29	p.Asn135Ser
chr5	121572097	C	G	MODERATE	missense_variant	Aldh2	p.Ala392Pro
chr5	121607201	TT	CC	MODERATE	missense_variant	Acad12	p.Asn307Gly
chr5	121607384	CGAAT	AGAAC	MODERATE	missense_variant	Acad12	p.HisSer280ArgSer
chr5	121607408	TG	CA	MODERATE	missense_variant	Acad12	p.Pro273Leu
chr5	121608005	AGG	GGA	MODERATE	missense_variant	Acad12	p.AsnLeu206AsnPro
chr5	121609804	T	C	MODERATE	missense_variant	Acad12	p.Asn184Asp
chr5	121610001	G	T	MODERATE	missense_variant	Acad12	p.Pro118Gln
chr5	121610136	C	G	MODERATE	missense_variant	Acad12	p.Ser73Thr
chr5	121622011	G	T	MODERATE	missense_variant	Acad10	p.His1006Gln
chr5	121622029	GACG	AGCT	MODERATE	missense_variant	Acad10	p.ValVal999ValAla
chr5	121622067	T	C	MODERATE	missense_variant&splice_region_variant	Acad10	p.Thr988Ala
chr5	121626187	C	T	MODERATE	missense_variant	Acad10	p.Arg893His
chr5	121656196	A	C	MODERATE	missense_variant	Acad10	p.Leu2Trp
chr5	121772688	T	G	MODERATE	missense_variant	Atxn2	p.Leu328Arg
chr5	121818231	G	C	MODERATE	missense_variant	Sh2b3	p.Leu437Val
chr5	121818802	G	A	MODERATE	missense_variant	Sh2b3	p.Pro299Ser
chr5	121828428	A	G	MODERATE	missense_variant	Sh2b3	p.Phe208Leu
chr5	121828482	G	A	MODERATE	missense_variant	Sh2b3	p.Arg190Cys
chr5	121828592	G	T	MODERATE	missense_variant	Sh2b3	p.Pro153Gln
chr5	121853022	A	G	MODERATE	missense_variant	Fam109a	p.Gln149Arg
chr5	121853065	CGAGCAGCCCT	TGAGCAGCCCG	MODERATE	missense_variant	Fam109a	p.ProGluGlnProSer163ProGluGlnProAla
chr5	121853091	GGCC	G	MODERATE	disruptive_inframe_deletion	Fam109a	p.Pro175del
chr5	122233595	A	C	MODERATE	missense_variant	Hvcn1	p.Glu66Ala
chr5	122331693	G	C	MODERATE	missense_variant	Rad9b	p.His293Asp
chr5	122339749	A	G	MODERATE	missense_variant	Rad9b	p.Leu188Ser
chr5	122351268	C	A	MODERATE	missense_variant	Rad9b	p.Gly122Cys
chr5	122351313	C	T	MODERATE	missense_variant	Rad9b	p.Val107Ile
chr5	122351613	G	A	MODERATE	missense_variant	Rad9b	p.Thr69Met
chr5	122369609	C	A	MODERATE	missense_variant	Fam216a	p.Ala52Ser
chr5	122435659	GAGGTGAG	AAGGTGAA	HIGH	splice_donor_variant&missense_variant&splice_region_variant&intron_variant	Anapc7	p.ArgGly272LysGly
chr5	122654204	G	A	MODERATE	missense_variant	P2rx7	p.Gly113Asp
chr5	122680868	T	C	MODERATE	missense_variant	P2rx7	p.Leu451Pro
chr5	122681057	A	G	MODERATE	missense_variant	P2rx7	p.His514Arg
chr5	122788447	C	T	MODERATE	missense_variant	Anapc5	p.Gly616Arg
chr5	123099889	G	A	MODERATE	missense_variant	Tmem120b	p.Ala81Thr
chr5	123157003	C	A	MODERATE	missense_variant	Setd1b	p.His907Gln
chr5	123157577	GGAGGAGGAA	G	MODERATE	disruptive_inframe_deletion	Setd1b	p.Glu1073_Glu1075del
chr5	123157775	C	A	MODERATE	missense_variant	Setd1b	p.Ala1108Asp
chr5	123157806	CGAC	GGAA	MODERATE	missense_variant	Setd1b	p.IleAsp1118MetGlu
chr5	123157844	AAGACAATGG	A	MODERATE	disruptive_inframe_deletion	Setd1b	p.Asn1133_Asp1135del
chr5	123160580	C	T	MODERATE	missense_variant	Setd1b	p.Pro1560Ser
chr5	123228375	CCAGGAT	TCAGGAA	MODERATE	missense_variant	Psmd9	p.IleGlnAsp23IleGlnGlu
chr5	123239689	T	C	MODERATE	missense_variant	Psmd9	p.Val130Ala
chr5	123241895	G	C	MODERATE	missense_variant	Psmd9	p.Val172Leu
chr5	123246231	A	G	MODERATE	missense_variant	Psmd9	p.Lys197Arg
chr5	123445507	C	A	MODERATE	missense_variant	Mlxip	p.Leu378Met
chr5	123446204	A	C	MODERATE	missense_variant	Mlxip	p.Asn610Thr
chr5	123558755	ACCACTGCCGCCA	GCCACCGCCGCCG	MODERATE	missense_variant	Vps33a	p.GlyGlyGlySerGly274GlyGlyGlyGlyGly
chr5	123603655	C	T	MODERATE	missense_variant	Clip1	p.Val1133Ile
chr5	123630305	C	T	MODERATE	missense_variant	Clip1	p.Glu744Lys
chr5	123714091	A	G	MODERATE	missense_variant	Zcchc8	p.Val162Ala
chr5	123764178	G	A	MODERATE	missense_variant	Kntc1	p.Val295Ile
chr5	123765041	C	T	MODERATE	missense_variant	Kntc1	p.Ala327Val
chr5	123769677	G	C	MODERATE	missense_variant	Kntc1	p.Ser447Thr
chr5	123771108	AG	GA	MODERATE	missense_variant	Kntc1	p.ArgAla504ArgThr
chr5	123782881	G	A	MODERATE	missense_variant	Kntc1	p.Ala921Thr
chr5	123791054	C	A	MODERATE	missense_variant&splice_region_variant	Kntc1	p.Gln1298Lys
chr5	123796096	T	C	MODERATE	missense_variant	Kntc1	p.Trp1397Arg
chr5	123803636	A	G	MODERATE	missense_variant	Kntc1	p.Thr1798Ala
chr5	123807268	C	T	MODERATE	missense_variant	Kntc1	p.Ser1834Leu
chr5	123878735	T	C	MODERATE	missense_variant	Hcar1	p.Thr298Ala
chr5	124090130	G	A	MODERATE	missense_variant	Abcb9	p.Thr16Met
chr5	124114549	T	G	MODERATE	missense_variant	Ogfod2	p.Asp230Glu
chr5	124117095	T	G	MODERATE	missense_variant	Arl6ip4	p.Val116Gly
chr5	124123577	CTT	TTC	MODERATE	missense_variant	Pitpnm2	p.GluArg973GluLys
chr5	124133235	T	C	MODERATE	missense_variant	Pitpnm2	p.Glu383Gly
chr5	124262909	C	T	MODERATE	missense_variant	Mphosph9	p.Ser925Asn
chr5	124263024	A	G	MODERATE	missense_variant	Mphosph9	p.Ser887Pro
chr5	124265422	C	A	MODERATE	missense_variant	Mphosph9	p.Asp848Tyr
chr5	124283640	C	T	MODERATE	missense_variant	Mphosph9	p.Arg776Gln
chr5	124292344	G	C	MODERATE	missense_variant	Mphosph9	p.Asn626Lys
chr5	124307004	T	G	MODERATE	missense_variant	Mphosph9	p.Ile349Leu
chr5	124307021	C	T	MODERATE	missense_variant	Mphosph9	p.Arg343His
chr5	124315692	A	G	MODERATE	missense_variant	Mphosph9	p.Tyr186His
chr5	124315739	G	T	MODERATE	missense_variant	Mphosph9	p.Ser170Tyr
chr5	124338675	C	T	MODERATE	missense_variant	2810006K23Rik	p.Arg11Cys
chr5	124468621	C	T	MODERATE	missense_variant	Rilpl2	p.Gly177Ser
chr5	124478077	A	C	MODERATE	missense_variant	Rilpl2	p.Asp3Glu
chr5	124558016	CCAAAGT	ACAAAGC	HIGH	splice_acceptor_variant&splice_region_variant&synonymous_variant&intron_variant	Ddx55	p.Gly134Gly
chr5	124578495	T	G	MODERATE	missense_variant	Eif2b1	p.Lys19Asn
chr5	124579008	C	G	MODERATE	missense_variant	Eif2b1	p.Glu2Asp
chr5	124584140	C	T	MODERATE	missense_variant	Gtf2h3	p.Leu69Phe
chr5	124584163	TG	CA	MODERATE	missense_variant	Gtf2h3	p.GlyGly76GlyArg
chr5	124584255	TT	CC	MODERATE	missense_variant	Gtf2h3	p.Val107Ala
chr5	124599752	T	C	MODERATE	missense_variant	Tctn2	p.Val79Ala
chr5	124610400	G	A	MODERATE	missense_variant	Tctn2	p.Arg339His
chr5	124623041	C	A	MODERATE	missense_variant	Tctn2	p.Gln511Lys
chr5	124624334	T	TAC	HIGH	frameshift_variant	Tctn2	p.Arg541fs
chr5	124716412	C	T	MODERATE	missense_variant	Atp6v0a2	p.Ala611Val
chr5	124885536	GA	G	HIGH	frameshift_variant&start_lost	Zfp664	p.Met1fs
chr5	125024179	T	C	MODERATE	missense_variant	Ncor2	p.Thr2191Ala
chr5	125048390	ACTGCC	GCTGCA	MODERATE	missense_variant	Ncor2	p.ProAlaVal783ProAlaAla
chr5	125050980	C	T	MODERATE	missense_variant	Ncor2	p.Ala696Thr
chr5	125124778	A	G	MODERATE	missense_variant	Ncor2	p.Ser33Pro
chr5	125283826	GAGCT	G	HIGH	frameshift_variant	Scarb1	p.Ala491fs
chr5	125415322	C	T	MODERATE	missense_variant	Dhx37	p.Ala1116Thr
chr5	125416043	T	C	MODERATE	missense_variant	Dhx37	p.Lys1059Arg
chr5	125424970	C	G	MODERATE	missense_variant	Dhx37	p.Lys487Asn
chr5	125431709	C	T	MODERATE	missense_variant	Dhx37	p.Arg54Lys
chr5	125475993	G	A	MODERATE	missense_variant	Aacs	p.Arg6Gln
chr5	125484618	C	T	MODERATE	missense_variant	Aacs	p.Arg107Trp
chr5	127604172	G	A	MODERATE	missense_variant	Slc15a4	p.Ala344Val
chr5	127608941	A	G	MODERATE	missense_variant	Slc15a4	p.Phe226Leu
chr5	127644404	A	G	MODERATE	missense_variant	Glt1d1	p.Met52Val
chr5	127650688	A	G	MODERATE	missense_variant	Glt1d1	p.Ser75Gly
chr5	127663363	T	G	MODERATE	missense_variant	Glt1d1	p.Phe133Val
chr5	129606538	A	G	HIGH	stop_lost	Mmp17	p.Ter579Trpext*?
chr5	129793710	A	G	MODERATE	missense_variant	Cct6a	p.Glu348Gly
chr5	129847012	G	A	HIGH	stop_gained	Sumf2	p.Trp6*
chr5	129847032	TTGCTCCCTC	CTGCTCCCTG	MODERATE	missense_variant	Sumf2	p.LeuLeuProPro13LeuLeuProAla
chr5	129860142	G	A	MODERATE	missense_variant	Sumf2	p.Arg257His
chr5	130213045	A	G	MODERATE	missense_variant	Rabgef1	p.Glu430Gly
chr5	130236945	CGTCACTGTGTAAGTG	TGTCACCGTGTAAGTA	HIGH	splice_donor_variant&splice_region_variant&synonymous_variant&intron_variant	Tmem248	p.ProValThrVal196ProValThrVal
chr5	130267946	T	C	MODERATE	missense_variant	Tyw1	p.Cys135Arg
chr5	132259105	G	A	MODERATE	missense_variant	Auts2	p.Ala114Val
chr5	134191206	A	C	MODERATE	missense_variant	Gtf2ird2	p.Thr8Pro
chr5	134203334	T	C	MODERATE	missense_variant	Gtf2ird2	p.Val242Ala
chr5	134203346	A	C	MODERATE	missense_variant&splice_region_variant	Gtf2ird2	p.Gln246Pro
chr5	134222050	A	T	MODERATE	missense_variant	Ncf1	p.Leu345Gln
chr5	134295595	A	G	MODERATE	missense_variant	Gtf2i	p.Val5Ala
chr5	134492281	T	C	MODERATE	missense_variant	Clip2	p.Asn1003Asp
chr5	134523104	A	C	MODERATE	missense_variant	Clip2	p.Ser55Ala
chr5	134535093	CCCAACGGAC	TCCAATGGAT	MODERATE	missense_variant	Clip2	p.ProSerValGly23ProSerIleGly
chr5	134604785	T	C	MODERATE	missense_variant	Lat2	p.Asn120Asp
chr5	134606576	T	C	MODERATE	missense_variant	Lat2	p.Asn76Asp
chr5	134606795	G	A	MODERATE	missense_variant	Lat2	p.Ala55Val
chr5	134657333	A	C	MODERATE	missense_variant	Limk1	p.Ser612Ala
chr5	134933537	G	A	MODERATE	missense_variant	Wbscr27	p.Arg63Gln
chr5	134940465	G	A	MODERATE	missense_variant	Wbscr27	p.Val164Ile
chr5	134940521	A	C	MODERATE	missense_variant	Wbscr27	p.Glu182Asp
chr5	134940544	G	A	MODERATE	missense_variant	Wbscr27	p.Arg190Gln
chr5	135011655	A	G	MODERATE	missense_variant	Abhd11	p.Thr261Ala
chr5	135122074	G	A	MODERATE	missense_variant	Mlxipl	p.Arg193His
chr5	135132648	T	C	MODERATE	missense_variant	Mlxipl	p.Ser474Pro
chr5	135132714	G	A	MODERATE	missense_variant	Mlxipl	p.Gly496Ser
chr5	135133588	T	C	MODERATE	missense_variant	Mlxipl	p.Ser635Pro
chr5	135216801	G	A	MODERATE	missense_variant	Baz1b	p.Gly368Glu
chr5	135218015	G	A	MODERATE	missense_variant	Baz1b	p.Val773Met
chr5	135240024	C	CAT	HIGH	splice_acceptor_variant&intron_variant	Baz1b
chr5	135370260	GCCAGT	ACCAGC	MODERATE	missense_variant	Nsun5	p.AlaSer55ThrSer
chr5	135374982	G	C	MODERATE	missense_variant	Nsun5	p.Val271Leu
chr5	135375565	G	A	MODERATE	missense_variant	Nsun5	p.Val386Ile
chr5	135380977	C	T	MODERATE	missense_variant	Pom121	p.Gly1109Ser
chr5	135381186	C	T	MODERATE	missense_variant	Pom121	p.Ser1039Asn
chr5	135381858	G	A	MODERATE	missense_variant	Pom121	p.Ala815Val
chr5	135428531	T	G	MODERATE	missense_variant	Hip1	p.Asn747Thr
chr5	135429201	C	G	MODERATE	missense_variant	Hip1	p.Gly667Arg
chr5	135429239	C	T	MODERATE	missense_variant	Hip1	p.Ser654Asn
chr5	135431661	CAGGT	TAGGC	MODERATE	missense_variant	Hip1	p.AsnLeu547SerLeu
chr5	135435102	A	G	MODERATE	missense_variant	Hip1	p.Met427Thr
chr5	135435178	TG	CA	MODERATE	missense_variant	Hip1	p.AlaMet401AlaVal
chr5	135570851	C	T	MODERATE	missense_variant	Ccl24	p.Ala102Thr
chr5	135570895	T	C	MODERATE	missense_variant	Ccl24	p.Gln87Arg
chr5	135734123	A	G	MODERATE	missense_variant	Por	p.Thr496Ala
chr5	136038875	G	A	MODERATE	missense_variant	Upk3b	p.Ser25Asn
chr5	136098764	A	T	MODERATE	missense_variant	Rasa4	p.Lys240Ile
chr5	136101012	G	C	MODERATE	missense_variant	Rasa4	p.Gly282Ala
chr5	136102362	A	G	MODERATE	missense_variant	Rasa4	p.Ile437Val
chr5	136105730	GAC	ATT	MODERATE	missense_variant	Rasa4	p.Asp698Ile
chr5	136133024	G	T	MODERATE	missense_variant	Lrwd1	p.Ala210Asp
chr5	136133408	C	T	MODERATE	missense_variant	Lrwd1	p.Ser157Asn
chr5	136140561	CA	TG	MODERATE	missense_variant	Alkbh4	p.Thr148Met
chr5	136181413	C	T	MODERATE	missense_variant	Prkrip1	p.Val182Ile
chr5	136274885	A	G	MODERATE	missense_variant	Cux1	p.Leu1583Pro
chr5	136304779	A	G	MODERATE	missense_variant&splice_region_variant	Cux1	p.Val1118Ala
chr5	136308466	C	T	MODERATE	missense_variant	Cux1	p.Ala827Thr
chr5	136972437	A	G	MODERATE	missense_variant	Cldn15	p.Lys112Arg
chr5	137071068	C	T	MODERATE	missense_variant	Serpine1	p.Arg79Gln
chr5	137114647	T	A	MODERATE	missense_variant	Trim56	p.Asp5Val
chr5	137299773	G	A	MODERATE	missense_variant	Srrt	p.Ala341Val
chr5	137315577	G	T	MODERATE	missense_variant	Slc12a9	p.Pro707Thr
chr5	137332537	A	C	MODERATE	missense_variant	Slc12a9	p.Ser34Ala
chr5	137373591	G	A	MODERATE	missense_variant	Ephb4	p.Ala981Thr
chr5	137520682	G	A	MODERATE	missense_variant	Gigyf1	p.Arg275Lys
chr5	137520969	T	G	MODERATE	missense_variant	Gigyf1	p.Ser343Ala
chr5	137522138	G	C	MODERATE	missense_variant	Gigyf1	p.Gly404Ala
chr5	137524054	G	T	MODERATE	missense_variant	Gigyf1	p.Gln711His
chr5	137599632	A	G	MODERATE	missense_variant	Mospd3	p.Val158Ala
chr5	137599708	A	C	MODERATE	missense_variant	Mospd3	p.Ser133Ala
chr5	137600430	C	T	MODERATE	missense_variant	Mospd3	p.Ala16Thr
chr5	137661424	T	C	MODERATE	missense_variant	Agfg2	p.Thr276Ala
chr5	137664278	T	C	MODERATE	missense_variant	Agfg2	p.Ile176Val
chr5	137731755	A	C	MODERATE	missense_variant	Nyap1	p.Val810Gly
chr5	137735931	G	A	MODERATE	missense_variant	Nyap1	p.Thr280Met
chr5	137747780	C	G	MODERATE	missense_variant	Tsc22d4	p.Ala222Gly
chr5	137762526	G	A	MODERATE	missense_variant	Tsc22d4	p.Gly369Ser
chr5	137768114	C	T	MODERATE	missense_variant	Tsc22d4	p.Arg481Trp
chr5	137768126	T	C	MODERATE	missense_variant	Tsc22d4	p.Trp485Arg
chr5	137785312	CCTG	C	MODERATE	inframe_deletion	Mepce	p.Gln250del
chr5	137831211	A	G	MODERATE	missense_variant	Pilra	p.Val197Ala
chr5	137831253	AC	TT	MODERATE	missense_variant	Pilra	p.Val183Asn
chr5	137835373	ACTG	CCTT	MODERATE	missense_variant	Pilra	p.GlnPhe143LysVal
chr5	137835418	G	A	MODERATE	missense_variant	Pilra	p.Arg129Trp
chr5	137835544	A	C	MODERATE	missense_variant	Pilra	p.Phe87Val
chr5	137835640	A	G	MODERATE	missense_variant	Pilra	p.Ser55Pro
chr5	137981603	C	G	MODERATE	missense_variant	Azgp1	p.Ala15Gly
chr5	137985135	A	C	MODERATE	missense_variant	Azgp1	p.Tyr24Ser
chr5	138125242	C	T	MODERATE	missense_variant	Zscan21	p.Pro61Leu
chr5	138145470	T	C	MODERATE	missense_variant	Zfp113	p.Lys173Glu
chr5	138194452	T	A	MODERATE	missense_variant	Mblac1	p.Ser19Thr
chr5	138456067	G	A	MODERATE	missense_variant	Zfp157	p.Ala176Thr
chr5	138607459	A	G	MODERATE	missense_variant	Zfp68	p.Ser201Pro
chr5	138607520	T	A	MODERATE	missense_variant	Zfp68	p.Gln180His
chr5	138622972	T	C	MODERATE	missense_variant	A430033K04Rik	p.Leu8Pro
chr5	138639548	C	G	MODERATE	missense_variant	A430033K04Rik	p.Pro74Ala
chr5	138646120	G	A	MODERATE	missense_variant	A430033K04Rik	p.Arg89His
chr5	138646146	G	A	MODERATE	missense_variant	A430033K04Rik	p.Gly98Ser
chr5	138646201	CAC	TAT	MODERATE	missense_variant	A430033K04Rik	p.ThrPro116IleSer
chr5	138647266	A	C	MODERATE	missense_variant	A430033K04Rik	p.Glu471Ala
chr5	138757947	G	A	MODERATE	missense_variant	Fam20c	p.Arg246Gln
chr5	139229865	T	TGAATCA	MODERATE	inframe_insertion	Sun1	p.Glu259_Thr260insSerGlu
chr5	139235588	G	T	MODERATE	missense_variant	Sun1	p.Ala509Ser
chr5	139474889	T	C	MODERATE	missense_variant	Zfand2a	p.Asn133Ser
chr5	139478520	C	T	MODERATE	missense_variant	Zfand2a	p.Gly77Ser
chr5	139713387	C	T	MODERATE	missense_variant	Micall2	p.Ala598Thr
chr5	139715793	G	A	MODERATE	missense_variant	Micall2	p.Ala565Val
chr5	139716396	T	C	MODERATE	missense_variant	Micall2	p.Asn364Ser
chr5	139716432	A	G	MODERATE	missense_variant	Micall2	p.Ile352Thr
chr5	139716495	A	C	MODERATE	missense_variant	Micall2	p.Ile331Ser
chr5	139716536	T	G	MODERATE	missense_variant	Micall2	p.Gln317His
chr5	139716674	GCCGAA	ACCGAC	MODERATE	missense_variant	Micall2	p.PheGly270ValGly
chr5	139755190	C	T	MODERATE	missense_variant	Ints1	p.Val1907Ile
chr5	139755298	C	T	MODERATE	missense_variant	Ints1	p.Val1871Ile
chr5	139756324	G	A	MODERATE	missense_variant	Ints1	p.Pro1762Leu
chr5	139757101	A	G	MODERATE	missense_variant	Ints1	p.Cys1707Arg
chr5	139757179	T	C	MODERATE	missense_variant	Ints1	p.Ile1681Val
chr5	139757904	TG	CC	MODERATE	missense_variant	Ints1	p.ThrThr1596ThrAla
chr5	139759201	C	A	MODERATE	missense_variant	Ints1	p.Ala1451Ser
chr5	139759311	C	T	MODERATE	missense_variant	Ints1	p.Gly1414Asp
chr5	139762914	A	G	MODERATE	missense_variant	Ints1	p.Ile1046Thr
chr5	139775426	T	G	MODERATE	missense_variant	Ints1	p.Glu15Asp
chr5	140328366	C	T	MODERATE	missense_variant	Ftsj2	p.Arg238His
chr5	140331001	G	T	MODERATE	missense_variant	Ftsj2	p.Arg93Ser
chr5	140331267	T	G	MODERATE	missense_variant&splice_region_variant	Ftsj2	p.His4Pro
chr5	140337640	C	A	MODERATE	missense_variant	Nudt1	p.Leu116Met
chr5	140523891	T	C	MODERATE	missense_variant	Chst12	p.Val91Ala
chr5	140635576	T	C	MODERATE	missense_variant	Ttyh3	p.Ile115Val
chr5	140635913	T	C	MODERATE	missense_variant	Ttyh3	p.Thr93Ala
chr5	140636045	T	C	MODERATE	missense_variant	Ttyh3	p.Thr49Ala
chr5	140666205	A	G	MODERATE	missense_variant	Iqce	p.Val671Ala
chr5	140675151	G	T	MODERATE	missense_variant	Iqce	p.Ala523Asp
chr5	140677427	C	T	MODERATE	missense_variant	Iqce	p.Val487Met
chr5	140705144	G	T	MODERATE	missense_variant	Brat1	p.Val12Leu
chr5	140711609	A	C	MODERATE	missense_variant	Brat1	p.Tyr174Ser
chr5	140714609	T	C	MODERATE	missense_variant	Brat1	p.Ile398Thr
chr5	140882319	G	A	MODERATE	missense_variant	Card11	p.Ala858Val
chr5	142466500	A	G	MODERATE	missense_variant	Ap5z1	p.Met63Val
chr5	142467666	TGT	CGC	MODERATE	missense_variant	Ap5z1	p.Cys130Arg
chr5	142472337	T	C	MODERATE	missense_variant	Ap5z1	p.Ser422Pro
chr5	142474411	A	G	MODERATE	missense_variant	Ap5z1	p.Ile498Val
chr5	142474513	A	AGGTG	HIGH	frameshift_variant	Ap5z1	p.Ser529fs
chr5	142475703	A	G	MODERATE	missense_variant&splice_region_variant	Ap5z1	p.Thr570Ala
chr5	142477286	G	A	MODERATE	missense_variant	Ap5z1	p.Glu742Lys
chr5	142666167	A	G	MODERATE	missense_variant	Wipi2	p.Thr381Ala
chr5	142759764	T	A	MODERATE	missense_variant	Tnrc18	p.Gln1600Leu
chr5	142759837	G	A	MODERATE	missense_variant	Tnrc18	p.Pro1576Ser
chr5	142759954	C	T	MODERATE	missense_variant	Tnrc18	p.Gly1537Ser
chr5	142771580	A	G	MODERATE	missense_variant	Tnrc18	p.Val1244Ala
chr5	142771592	G	A	MODERATE	missense_variant	Tnrc18	p.Ala1240Val
chr5	142771965	C	T	MODERATE	missense_variant	Tnrc18	p.Val1116Met
chr5	143087523	GCG	ACA	MODERATE	missense_variant	Rnf216	p.AspAla394AspVal
chr5	143090241	T	C	MODERATE	missense_variant	Rnf216	p.Asp296Gly
chr5	143173880	A	G	MODERATE	missense_variant	Rbak	p.Trp473Arg
chr5	143174328	AAAGGT	GAAGGA	MODERATE	missense_variant	Rbak	p.ThrPhe322SerPhe
chr5	143174590	CCAGAGTCT	TCAGACTCA	MODERATE	missense_variant	Rbak	p.GlyAspSerGly233GlyGluSerGlu
chr5	143174732	CGTG	TGGA	MODERATE	missense_variant	Rbak	p.HisAsp188SerAsn
chr5	143174981	A	G	MODERATE	missense_variant	Rbak	p.Tyr106His
chr5	143175011	C	T	MODERATE	missense_variant	Rbak	p.Glu96Lys
chr5	143244325	C	G	MODERATE	missense_variant	Zfp12	p.Pro168Ala
chr5	143254321	G	T	MODERATE	missense_variant	Zfp316	p.His648Asn
chr5	143255251	A	C	MODERATE	missense_variant	Zfp316	p.Cys338Gly
chr5	143264333	G	C	MODERATE	missense_variant	Zfp316	p.Ser108Arg
chr5	143321866	A	T	MODERATE	missense_variant	Zdhhc4	p.Phe133Leu
chr5	143324294	C	T	MODERATE	missense_variant	Zdhhc4	p.Val70Ile
chr5	143466961	T	C	MODERATE	missense_variant	Daglb	p.Val35Ala
chr5	143562887	GAGG	CAGA	MODERATE	missense_variant	Fam220a	p.GlyGly18AlaAsp
chr5	143563067	A	G	MODERATE	missense_variant	Fam220a	p.His78Arg
chr5	143563141	G	A	MODERATE	missense_variant	Fam220a	p.Gly103Ser
chr5	143563342	G	A	MODERATE	missense_variant	Fam220a	p.Gly170Ser
chr5	143563400	GATACTT	AATACTC	MODERATE	missense_variant	Fam220a	p.ArgTyrPhe189GlnTyrSer
chr5	143563471	T	C	MODERATE	missense_variant	Fam220a	p.Cys213Arg
chr5	143714984	C	T	MODERATE	missense_variant	Usp42	p.Val1095Ile
chr5	143715062	C	T	MODERATE	missense_variant	Usp42	p.Asp1069Asn
chr5	143715614	T	C	MODERATE	missense_variant	Usp42	p.Thr885Ala
chr5	143716033	A	G	MODERATE	missense_variant	Usp42	p.Leu745Pro
chr5	143718037	C	T	MODERATE	missense_variant	Usp42	p.Ala424Thr
chr5	143899186	T	C	MODERATE	missense_variant	Eif2ak1	p.Val526Ala
chr5	143909666	T	C	MODERATE	missense_variant	Aimp2	p.His17Arg
chr5	143914774	T	C	MODERATE	missense_variant	Pms2	p.Tyr170His
chr5	143917638	A	T	MODERATE	missense_variant	Pms2	p.Tyr255Phe
chr5	143925482	G	A	MODERATE	missense_variant	Pms2	p.Arg469His
chr5	143925716	CAGGACAG	TAGGACAC	MODERATE	missense_variant	Pms2	p.ThrGlyGln547IleGlyHis
chr5	143925776	G	A	MODERATE	missense_variant	Pms2	p.Arg567His
chr5	143925900	G	A	MODERATE	missense_variant	Pms2	p.Met608Ile
chr5	144156954	G	T	MODERATE	missense_variant	Lmtk2	p.Ala250Ser
chr5	144173643	G	A	MODERATE	missense_variant	Lmtk2	p.Asp394Asn
chr5	144173754	G	A	MODERATE	missense_variant	Lmtk2	p.Asp431Asn
chr5	144175231	A	C	MODERATE	missense_variant	Lmtk2	p.Asn923Thr
chr5	144175347	T	G	MODERATE	missense_variant	Lmtk2	p.Ser962Ala
chr5	144175426	G	A	MODERATE	missense_variant	Lmtk2	p.Arg988Gln
chr5	144195942	G	A	MODERATE	missense_variant	Tecpr1	p.Arg1159Cys
chr5	144275846	C	T	MODERATE	missense_variant	Baiap2l1	p.Gly453Asp
chr5	144901192	T	C	MODERATE	missense_variant	Smurf1	p.Asn63Ser
chr5	145097324	G	GTGGGGA	HIGH	splice_donor_variant&intron_variant	Arpc1a
chr5	145148379	CA	TG	MODERATE	missense_variant	Ptcd1	p.ValGly680ValArg
chr5	145151354	C	T	MODERATE	missense_variant	Ptcd1	p.Val616Ile
chr5	145151459	C	T	MODERATE	missense_variant	Ptcd1	p.Val581Met
chr5	145154790	T	C	MODERATE	missense_variant	Ptcd1	p.Thr500Ala
chr5	145155119	G	A	MODERATE	missense_variant	Ptcd1	p.Ser390Phe
chr5	145155206	G	C	MODERATE	missense_variant	Ptcd1	p.Ala361Gly
chr5	145159490	GCACAG	ACACAT	MODERATE	missense_variant	Ptcd1	p.LeuCys263MetCys
chr5	145165233	C	T	MODERATE	missense_variant	Ptcd1	p.Gly92Asp
chr5	145195941	T	G	MODERATE	missense_variant	Zkscan14	p.Asn260Thr
chr5	145201647	G	A	MODERATE	missense_variant	Zkscan14	p.Pro10Leu
chr5	145205676	A	G	MODERATE	missense_variant	Zkscan5	p.Ile128Val
chr5	145207677	G	T	MODERATE	missense_variant	Zkscan5	p.Glu172Asp
chr5	145220739	A	G	MODERATE	missense_variant	Zkscan5	p.Ile684Val
chr5	145220778	A	G	MODERATE	missense_variant	Zkscan5	p.Lys697Glu
chr5	145242995	A	G	MODERATE	missense_variant	Zfp655	p.Asn71Ser
chr5	145243013	G	A	MODERATE	missense_variant	Zfp655	p.Gly77Asp
chr5	145244301	A	G	MODERATE	missense_variant	Zfp655	p.Gln323Arg
chr5	145244328	A	G	MODERATE	missense_variant	Zfp655	p.Lys332Arg
chr5	145244553	A	G	MODERATE	missense_variant	Zfp655	p.Gln407Arg
chr5	145791729	T	G	MODERATE	missense_variant	Cyp3a44	p.Leu228Phe
chr5	145794753	A	T	MODERATE	missense_variant	Cyp3a44	p.Met168Lys
chr5	145864961	AA	CG	MODERATE	missense_variant	Cyp3a11	p.AsnSer277AsnAla
chr5	145992915	T	C	MODERATE	missense_variant	Cyp3a25	p.Ile215Val
chr5	145993280	TA	GG	MODERATE	missense_variant	Cyp3a25	p.SerMet171SerLeu
chr5	145993343	G	C	MODERATE	missense_variant	Cyp3a25	p.Gln151Glu
chr5	146001467	T	G	MODERATE	missense_variant	Cyp3a25	p.Lys67Thr
chr5	146003062	G	A	MODERATE	missense_variant	Cyp3a25	p.Pro45Leu
chr5	146009505	C	A	MODERATE	missense_variant	Cyp3a25	p.Trp12Cys
chr5	146211321	T	G	MODERATE	missense_variant	Rnf6	p.Ser307Arg
chr5	146219267	TTAATT	CTAATC	MODERATE	missense_variant&splice_region_variant	Rnf6	p.GluLeuLys3GlyLeuGlu
chr5	146740469	G	T	MODERATE	missense_variant	Usp12	p.Leu253Met
chr5	146847458	T	C	MODERATE	missense_variant	Rasl11a	p.Ser238Pro
chr5	147029269	T	C	MODERATE	missense_variant	Lnx2	p.Thr347Ala
chr5	147033348	A	G	MODERATE	missense_variant	Lnx2	p.Ser195Pro
chr5	147042139	C	G	MODERATE	missense_variant	Lnx2	p.Ser101Thr
chr5	147571453	G	T	MODERATE	missense_variant&splice_region_variant	Flt1	p.Gln1164Lys
chr5	147582596	TG	CA	MODERATE	missense_variant	Flt1	p.SerSer969SerGly
chr5	147582670	C	T	MODERATE	missense_variant	Flt1	p.Ser945Asn
chr5	147599651	TGTCTTTACTTCG	CGTCTTTATTTCA	MODERATE	missense_variant	Flt1	p.SerGluValLysThr789SerGluIleLysThr
chr5	147634434	C	T	MODERATE	missense_variant	Flt1	p.Val688Ile
chr5	147646202	T	C	MODERATE	missense_variant	Flt1	p.Gln529Arg
chr5	147678283	G	C	MODERATE	missense_variant	Flt1	p.Asp284Glu
chr5	147699835	G	T	MODERATE	missense_variant	Flt1	p.Thr113Lys
chr5	147699883	G	A	MODERATE	missense_variant	Flt1	p.Thr97Met
chr5	147699920	C	T	MODERATE	missense_variant	Flt1	p.Asp85Asn
chr5	147879210	C	T	MODERATE	missense_variant	Slc46a3	p.Val436Ile
chr5	147886375	T	C	MODERATE	missense_variant	Slc46a3	p.Asn219Ser
chr5	148334656	C	T	MODERATE	missense_variant&splice_region_variant	Slc7a1	p.Ala498Thr
chr5	148335386	C	T	MODERATE	missense_variant	Slc7a1	p.Gly494Ser
chr5	149184804	AGGGTAAGGA	CGGGTAAGGG	HIGH	splice_donor_variant&splice_region_variant&5_prime_UTR_variant&intron_variant	Uspl1
chr5	149188415	C	T	MODERATE	missense_variant	Uspl1	p.Ala58Val
chr5	149193964	T	C	MODERATE	missense_variant	Uspl1	p.Leu119Pro
chr5	149194051	A	G	MODERATE	missense_variant	Uspl1	p.Asp148Gly
chr5	149194075	A	C	MODERATE	missense_variant	Uspl1	p.Asp156Ala
chr5	149194099	C	T	MODERATE	missense_variant	Uspl1	p.Ala164Val
chr5	149204300	A	G	MODERATE	missense_variant	Uspl1	p.Ile370Val
chr5	149209754	G	T	MODERATE	missense_variant	Uspl1	p.Gln438His
chr5	149213481	C	T	MODERATE	missense_variant	Uspl1	p.Ala497Val
chr5	149213975	G	T	MODERATE	missense_variant	Uspl1	p.Val662Leu
chr5	149214032	T	C	MODERATE	missense_variant	Uspl1	p.Ser681Pro
chr5	149214060	C	T	MODERATE	missense_variant	Uspl1	p.Thr690Ile
chr5	149214404	A	G	MODERATE	missense_variant	Uspl1	p.Met805Val
chr5	149412220	A	C	MODERATE	missense_variant	Medag	p.Glu81Asp
chr5	149625025	GAGAGGAG	CAGAGGAA	MODERATE	missense_variant	Hsph1	p.GlySerSerLeu508GlySerSerVal
chr5	149629974	C	T	MODERATE	missense_variant	Hsph1	p.Val241Ile
chr5	149709395	A	G	MODERATE	missense_variant	B3glct	p.Lys70Arg
chr5	150388799	TA	CG	MODERATE	missense_variant	Fry	p.ArgMet726ArgVal
chr5	150394168	C	T	MODERATE	missense_variant	Fry	p.Thr871Met
chr5	150436792	A	G	MODERATE	missense_variant	Fry	p.Ser1968Gly
chr5	150436813	A	G	MODERATE	missense_variant	Fry	p.Ser1975Gly
chr5	150643128	C	T	MODERATE	missense_variant	N4bp2l2	p.Ala572Thr
chr5	150661553	A	C	MODERATE	missense_variant	N4bp2l2	p.Cys321Gly
chr5	150661919	C	T	MODERATE	missense_variant	N4bp2l2	p.Glu199Lys
chr5	150801229	T	TGTAA	HIGH	splice_donor_variant&intron_variant	Pds5b
chr5	151045928	C	A	MODERATE	missense_variant	Stard13	p.Ala919Ser
chr5	151046010	GTGTGGAAC	CTGTGGAAA	MODERATE	missense_variant&splice_region_variant	Stard13	p.ValProHis889PheProGln
chr5	151047592	T	C	MODERATE	missense_variant&splice_region_variant	Stard13	p.Lys850Arg
chr5	151059659	C	T	MODERATE	missense_variant	Stard13	p.Ala647Thr
chr5	151062894	T	C	MODERATE	missense_variant	Stard13	p.Met384Val
